# Supplementary material for: In leukemia, knock-down of the death inducer-obliterator gene would inhibit the proliferation of endothelial cells by inhibiting the expression of CDK6 and CCND1
Source: PubMed Central journal article supplement (PMC8815367; doi:10.7717/peerj.12832), 2022-02-01

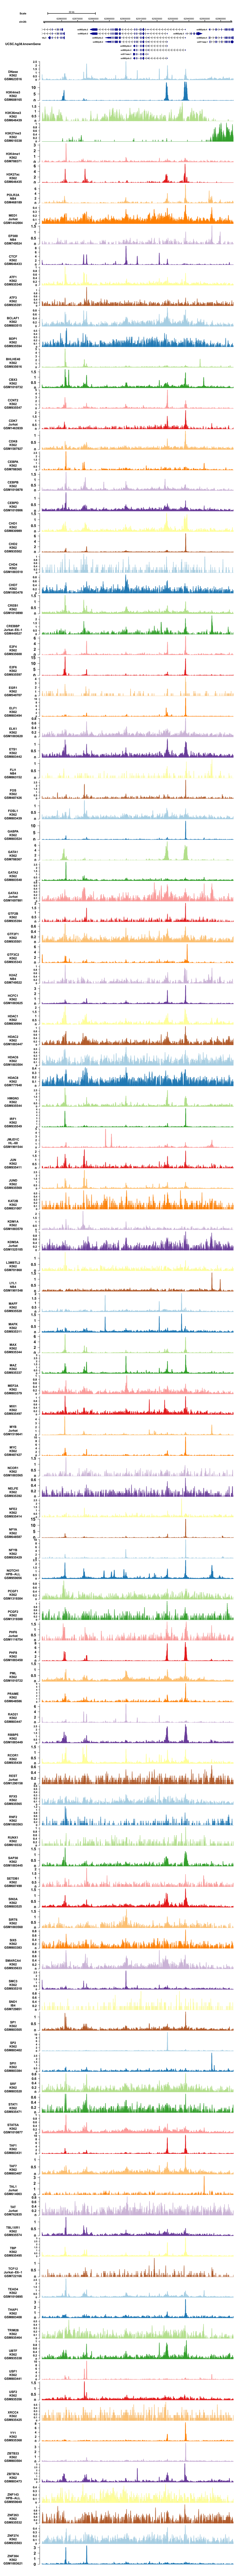

Supplement: peerj-10-12832-s004.pdf [file peerj-10-12832-s004.pdf]
