# Supplementary material for: In leukemia, knock-down of the death inducer-obliterator gene would inhibit the proliferation of endothelial cells by inhibiting the expression of CDK6 and CCND1
Source: PeerJ. 2022 Feb 1;10:e12832. doi: 10.7717/peerj.12832 (PMC8815367; doi:10.7717/peerj.12832)
Supplement: Supplemental Information 6 [file peerj-10-12832-s006.xls]

## Sheet: Sheet1
Gene ID	Gene Name	Synonyms	Description	Corrected p-value	Fold change
284695	ZNF326	ZAN75|ZIRD|Zfp326|dJ871E2.1	zinc finger protein 326	6.52139e-05	1.61986
122786	FRMD6	C14orf31|EX1|Willin|c14_5320	FERM domain containing 6	1.05529e-05	1.56363
22809	ATF5	ATFX|HMFN0395	activating transcription factor 5	7.2104e-06	1.56063
63901	FAM111A	GCLEB|KCS2	family with sequence similarity 111 member A	5.25715e-05	1.53054
1974	EIF4A2	BM-010|DDX2B|EIF4A|EIF4F|eIF-4A-II|eIF4A-II	eukaryotic translation initiation factor 4A2	0.00012279	1.52719
100302143	MIR1248	MIRN1248|hsa-mir-1248|mir-1248	microRNA 1248	0.00012279	1.52719
8148	TAF15	Npl3|RBP56|TAF2N|TAFII68	TATA-box binding protein associated factor 15	1.14374e-05	1.47743
124245	ZC3H18	NHN1	zinc finger CCCH-type containing 18	5.72642e-05	1.47433
84946	LTV1	C6orf93|dJ468K18.4	LTV1 ribosome biogenesis factor	0.000145824	1.44226
692149	SCARNA14	U100	small Cajal body-specific RNA 14	7.68131e-05	1.44151
51388	NIP7	CGI-37|HSPC031|KD93	NIP7, nucleolar pre-rRNA processing protein	3.99842e-05	1.41845
7398	USP1	UBP	ubiquitin specific peptidase 1	1.71358e-05	1.39523
24147	FJX1	-	four jointed box 1	9.84574e-05	1.39182
3422	IDI1	IPP1|IPPI1	isopentenyl-diphosphate delta isomerase 1	0.000225868	1.39084
10938	EHD1	H-PAST|HPAST1|PAST|PAST1	EH domain containing 1	0.000165349	1.38288
127933	UHMK1	KIS|KIST|P-CIP2	U2AF homology motif (UHM) kinase 1	8.59298e-05	1.37789
26973	CHORDC1	CHP1	cysteine and histidine rich domain containing 1	0.000204412	1.37474
23175	LPIN1	PAP1	lipin 1	0.000115009	1.3649
55728	N4BP2	B3BP	NEDD4 binding protein 2	0.00238873	1.3618
151636	DTX3L	BBAP	deltex E3 ubiquitin ligase 3L	6.02812e-05	1.34871
378708	APITD1	CENP-S|CENPS|FAAP16|MHF1	apoptosis-inducing, TAF9-like domain 1	0.000226091	1.34798
144348	ZNF664	ZFOC1|ZNF176	zinc finger protein 664	0.000117753	1.3443
112495	GTF3C6	C6orf51|TFIIIC35|bA397G5.3	general transcription factor IIIC subunit 6	0.00016864	1.33799
64750	SMURF2	-	SMAD specific E3 ubiquitin protein ligase 2	0.000291102	1.33652
11083	DIDO1	BYE1|C20orf158|DATF-1|DATF1|DIDO2|DIDO3|DIO-1|DIO1|dJ885L7.8	death inducer-obliterator 1	0.000183389	1.32434
3157	HMGCS1	HMGCS	3-hydroxy-3-methylglutaryl-CoA synthase 1	7.68131e-05	1.32326
55299	BRIX1	BRIX|BXDC2	BRX1, biogenesis of ribosomes	0.000184646	1.31538
25926	NOL11	-	nucleolar protein 11	6.52139e-05	1.3144
80014	WWC2	BOMB	WW and C2 domain containing 2	0.000213125	1.31375
54962	TIPIN	-	TIMELESS interacting protein	6.3144e-05	1.30956
