# Supplementary material for: In leukemia, knock-down of the death inducer-obliterator gene would inhibit the proliferation of endothelial cells by inhibiting the expression of CDK6 and CCND1
Source: PeerJ. 2022 Feb 1;10:e12832. doi: 10.7717/peerj.12832 (PMC8815367; doi:10.7717/peerj.12832)
Supplement: Supplemental Information 7 [file peerj-10-12832-s007.xlsx]

## Sheet: Different Gene
Entrez	Gene Symbol	Gene Title	4893-1	4893-2	4893-3	4892-1	4892-2	4892-3	Fold Change	logFC	absolute FC	Regulation	P-value	FDR
81488	POLR2M	polymerase (RNA) II (DNA directed) polypeptide M	7.85223	7.76567	7.69012	8.57587	8.62398	8.6014	-1.77901	-0.831077	1.77901	down	8.64812e-11	4.57512e-09
6288	SAA1	serum amyloid A1	6.8216	6.77546	7.03532	7.91992	7.73216	7.92613	-1.97512	-0.981943	1.97512	down	1.88862e-09	5.09862e-08
92259	MRPS36	mitochondrial ribosomal protein S36	6.30452	5.9742	6.34138	6.73502	6.78685	6.86763	-1.50504	-0.5898	1.50504	down	1.00423e-05	6.41424e-05
100130562	RPS2P5	ribosomal protein S2 pseudogene 5	11.0895	11.356	11.0729	10.6611	10.5246	10.5491	1.50996	0.594513	1.50996	up	7.20382e-08	9.89882e-07
5836	PYGL	phosphorylase, glycogen, liver	10.1231	10.0454	10.2146	9.52674	9.51257	9.57587	1.50451	0.589293	1.50451	up	8.23747e-10	2.65184e-08
64105	CENPK	centromere protein K	8.0638	8.08128	7.9671	8.95654	8.87915	8.90075	-1.83369	-0.874753	1.83369	down	1.42947e-11	1.14204e-09
4809	SNU13	SNU13 homolog, small nuclear ribonucleoprotein (U4/U6.U5)	9.23978	9.15045	9.14809	10.5247	10.4945	10.6102	-2.57347	-1.36371	2.57347	down	3.09173e-15	3.79771e-12
4047	LSS	lanosterol synthase (2,3-oxidosqualene-lanosterol cyclase)	7.96174	7.79106	8.03922	7.24768	7.24194	7.35679	1.56758	0.648537	1.56758	up	7.48768e-08	1.02318e-06
100533105	C8orf44-SGK3	C8orf44-SGK3 readthrough	4.97762	4.82531	4.81387	5.86425	5.87171	5.97527	-2.04412	-1.03148	2.04412	down	3.27867e-09	7.96999e-08
730755	KRTAP2-3	keratin associated protein 2-3	10.4654	10.485	10.5259	9.24106	8.99429	9.26614	2.50519	1.32492	2.50519	up	6.94815e-13	1.21924e-10
8139	GAN	gigaxonin	4.81145	4.6232	4.90715	5.39931	5.39289	5.58254	-1.59953	-0.677647	1.59953	down	3.9449e-06	2.88059e-05
8697	CDC23	cell division cycle 23	6.71283	6.66736	6.91646	7.32268	7.37902	7.36356	-1.50476	-0.589537	1.50476	down	4.56736e-07	4.65354e-06
100533467	BIVM-ERCC5	BIVM-ERCC5 readthrough	7.52659	7.5242	7.66611	6.94516	6.94481	7.07091	1.50039	0.58534	1.50039	up	1.38224e-07	1.70105e-06
3371	TNC	tenascin C	9.24283	9.22203	9.19957	9.82975	9.84897	10.0458	-1.60959	-0.686697	1.60959	down	1.0164e-09	3.12123e-08
59277	NTN4	netrin 4	5.59166	5.26059	5.63755	4.90688	4.79129	4.95333	1.52919	0.612767	1.52919	up	2.75501e-05	0.000152932
4241	MFI2	antigen p97 (melanoma associated) identified by monoclonal antibodies 133.2 and 96.5	7.08484	7.12501	7.11446	6.42211	6.50491	6.61323	1.51014	0.594687	1.51014	up	2.07133e-07	2.40099e-06
54602	NDFIP2	Nedd4 family interacting protein 2	6.00929	5.73431	5.94796	6.64874	6.7021	6.7081	-1.72803	-0.789127	1.72803	down	6.2995e-08	8.891e-07
1605	DAG1	dystroglycan 1	9.22212	9.24135	9.27959	8.60147	8.73805	8.61472	1.51181	0.596273	1.51181	up	1.52134e-09	4.30211e-08
201725	C4orf46	chromosome 4 open reading frame 46	7.37858	7.18573	7.16217	7.87615	7.78632	7.91184	-1.53256	-0.615943	1.53256	down	1.17488e-07	1.48206e-06
8704	B4GALT2	UDP-Gal:betaGlcNAc beta 1,4- galactosyltransferase, polypeptide 2	9.27981	9.25272	9.26889	9.8737	9.95628	9.91218	-1.56581	-0.646913	1.56581	down	2.26042e-11	1.61253e-09
60559	SPCS3	signal peptidase complex subunit 3	8.93741	8.77787	8.8093	9.57181	9.57616	9.47424	-1.62362	-0.69921	1.62362	down	3.96607e-10	1.49611e-08
9702	CEP57	centrosomal protein 57kDa	6.75335	6.94252	6.9173	7.43535	7.50193	7.69367	-1.59394	-0.672593	1.59394	down	2.28008e-07	2.59928e-06
3161	HMMR	hyaluronan-mediated motility receptor (RHAMM)	8.55829	8.52295	8.5456	9.22154	9.2417	9.13259	-1.57607	-0.65633	1.57607	down	1.84941e-10	8.18635e-09
11052	CPSF6	cleavage and polyadenylation specific factor 6	7.26688	7.16838	7.28073	7.89324	7.90262	7.99053	-1.61343	-0.690133	1.61343	down	3.42935e-09	8.25458e-08
23225	NUP210	nucleoporin 210kDa	7.35935	7.23867	7.25131	8.52164	8.36706	8.58372	-2.30969	-1.2077	2.30969	down	6.65115e-12	6.4712e-10
55274	PHF10	PHD finger protein 10	7.60799	7.51813	7.40356	6.25196	6.30381	6.31198	2.33051	1.22064	2.33051	up	1.64154e-11	1.25289e-09
51124	IER3IP1	immediate early response 3 interacting protein 1	10.0812	9.8746	9.92227	9.01751	9.08654	9.09649	1.8564	0.892507	1.8564	up	2.19025e-11	1.57103e-09
27229	TUBGCP4	tubulin, gamma complex associated protein 4	7.60208	7.62634	7.49121	6.89479	6.99948	6.98243	1.53083	0.61431	1.53083	up	4.34193e-08	6.54402e-07
64089	SNX16	sorting nexin 16	6.57369	6.39907	6.45537	5.58031	5.53599	5.54421	1.89545	0.92254	1.89545	up	3.2639e-09	7.94882e-08
54443	ANLN	anillin actin binding protein	8.84591	8.69703	8.75704	9.71408	9.66191	9.60946	-1.85981	-0.895157	1.85981	down	6.77204e-12	6.52423e-10
3146	HMGB1	high mobility group box 1	8.44867	8.33028	8.27977	8.87627	8.96009	9.02953	-1.51823	-0.60239	1.51823	down	1.27992e-08	2.39116e-07
995	CDC25C	cell division cycle 25C	7.84567	7.68198	7.82114	8.34986	8.4287	8.4208	-1.53353	-0.616857	1.53353	down	1.02438e-08	1.99828e-07
348801	LNP1	leukemia NUP98 fusion partner 1	5.45722	5.56045	5.28705	6.40519	6.18894	6.31338	-1.82462	-0.867597	1.82462	down	7.66079e-08	1.0426e-06
4780	NFE2L2	nuclear factor, erythroid 2 like 2	10.5122	10.4607	10.5458	11.0649	11.1031	11.1075	-1.50069	-0.585623	1.50069	down	1.14172e-11	9.69282e-10
23590	PDSS1	prenyl (decaprenyl) diphosphate synthase, subunit 1	7.05437	6.99392	6.86971	7.64664	7.57918	7.55883	-1.53924	-0.622217	1.53924	down	5.49425e-08	7.91072e-07
55012	PPP2R3C	protein phosphatase 2 regulatory subunit B'', gamma	6.5162	6.53058	6.6308	5.96639	6.00907	5.85183	1.53343	0.616763	1.53343	up	4.45752e-07	4.56519e-06
57181	SLC39A10	solute carrier family 39 (zinc transporter), member 10	6.36235	6.29092	6.23338	6.81853	7.05953	6.81853	-1.5192	-0.603313	1.5192	down	1.24383e-06	1.08047e-05
55757	UGGT2	UDP-glucose glycoprotein glucosyltransferase 2	5.34884	5.2898	5.45963	5.96926	6.00568	6.00942	-1.54617	-0.628697	1.54617	down	7.41654e-07	6.98591e-06
7067	THRA	thyroid hormone receptor, alpha	7.48944	7.473	7.37795	6.49297	6.55606	6.43679	1.93391	0.951523	1.93391	up	2.11294e-10	9.18793e-09
9117	SEC22C	SEC22 homolog C, vesicle trafficking protein	6.30816	6.11727	6.18731	7.18405	7.17675	7.16391	-1.95973	-0.970657	1.95973	down	4.39106e-10	1.62676e-08
29970	SCHIP1	schwannomin interacting protein 1	7.14491	7.08129	7.13102	7.77755	7.68594	7.88056	-1.58258	-0.662277	1.58258	down	1.65802e-08	2.96216e-07
22903	BTBD3	BTB (POZ) domain containing 3	8.07821	8.01523	7.97828	8.7106	8.70952	8.67807	-1.59714	-0.67549	1.59714	down	2.94917e-10	1.19299e-08
5607	MAP2K5	mitogen-activated protein kinase kinase 5	5.76388	5.93625	5.87362	5.20817	5.36984	4.90382	1.62147	0.697307	1.62147	up	1.04964e-05	6.66854e-05
1969	EPHA2	EPH receptor A2	9.76169	9.68555	9.70723	10.3205	10.2393	10.3504	-1.5003	-0.585247	1.5003	down	1.7295e-10	7.7693e-09
56934	CA10	carbonic anhydrase X	5.79232	5.86413	5.90176	6.6304	6.697	6.67391	-1.75853	-0.814367	1.75853	down	5.8593e-09	1.26545e-07
279	AMY2A	amylase, alpha 2A (pancreatic)	5.35526	5.34506	5.33899	3.75544	4.40974	4.33303	2.26634	1.18037	2.26634	up	3.96963e-07	4.13008e-06
55326	AGPAT5	1-acylglycerol-3-phosphate O-acyltransferase 5	5.2477	5.31333	5.2477	5.95532	5.99282	5.92168	-1.60997	-0.68703	1.60997	down	1.64131e-07	1.97294e-06
79780	CCDC82	coiled-coil domain containing 82	5.59451	5.58254	5.42915	6.21303	6.09222	6.30535	-1.58902	-0.668133	1.58902	down	7.9396e-07	7.38481e-06
374291	NDUFS7	NADH:ubiquinone oxidoreductase core subunit S7	5.0209	5.17821	5.22249	4.52686	4.31018	4.54287	1.60277	0.680563	1.60277	up	3.88295e-06	2.84745e-05
80205	CHD9	chromodomain helicase DNA binding protein 9	7.32766	7.27459	7.26026	7.8946	7.88181	7.91651	-1.5264	-0.610137	1.5264	down	5.46064e-09	1.19555e-07
153572	IRX2	iroquois homeobox 2	5.98135	5.93212	5.88883	5.17709	5.32192	5.45694	1.53204	0.61545	1.53204	up	3.34837e-06	2.51325e-05
9414	TJP2	tight junction protein 2	10.3054	10.2001	10.3015	9.71187	9.60718	9.67845	1.51904	0.60316	1.51904	up	2.44303e-10	1.02814e-08
84333	PCGF5	polycomb group ring finger 5	3.76436	3.95917	3.54038	4.73648	4.79143	4.78762	-2.024	-1.01721	2.024	down	1.22519e-07	1.53468e-06
5094	PCBP2	poly(rC) binding protein 2	7.16781	7.04123	7.27786	7.68587	7.72247	7.84923	-1.50548	-0.590223	1.50548	down	3.48507e-07	3.70337e-06
51560	RAB6B	RAB6B, member RAS oncogene family	8.05245	8.05275	8.12009	7.00882	7.45371	7.66041	1.62539	0.700783	1.62539	up	1.95178e-05	0.000113691
1459	CSNK2A2	casein kinase 2, alpha prime polypeptide	6.58006	6.57116	6.62575	5.97737	5.84614	5.51519	1.75656	0.812757	1.75656	up	7.22554e-07	6.838e-06
8317	CDC7	cell division cycle 7	5.36674	4.99095	5.15031	6.12728	6.07843	6.18162	-1.94501	-0.959777	1.94501	down	4.78122e-08	7.05198e-07
56912	IFT46	intraflagellar transport 46	6.27151	5.94153	6.06435	6.98072	7.18798	7.17296	-2.02992	-1.02142	2.02992	down	7.99482e-09	1.62153e-07
23076	RRP1B	ribosomal RNA processing 1B	9.30619	9.29152	9.2627	10.7423	10.7497	10.7446	-2.74869	-1.45874	2.74869	down	3.9022e-17	2.90664e-13
84945	ABHD13	abhydrolase domain containing 13	4.65517	4.44386	4.7883	5.31144	5.25995	5.26863	-1.57014	-0.650897	1.57014	down	6.61102e-06	4.4873e-05
55680	RUFY2	RUN and FYVE domain containing 2	5.88155	5.79119	5.60238	6.43343	6.35906	6.35442	-1.54107	-0.62393	1.54107	down	1.63141e-06	1.35918e-05
10221	TRIB1	tribbles pseudokinase 1	8.59541	8.46803	8.5453	9.20641	9.09596	9.37852	-1.61409	-0.690717	1.61409	down	1.33343e-08	2.47349e-07
8744	TNFSF9	tumor necrosis factor superfamily member 9	7.14226	7.05928	7.24742	7.86741	7.90059	7.87014	-1.65832	-0.729727	1.65832	down	3.17437e-09	7.78869e-08
6924	TCEB3	transcription elongation factor B (SIII), polypeptide 3 (110kDa, elongin A)	8.71288	8.60164	8.5664	7.87634	7.76985	7.76272	1.77031	0.824003	1.77031	up	1.7837e-10	7.96726e-09
572	BAD	BCL2 associated agonist of cell death	9.36257	9.31209	9.36067	8.70472	8.78927	8.76315	1.5081	0.59273	1.5081	up	3.45293e-10	1.34915e-08
27327	TNRC6A	trinucleotide repeat containing 6A	8.53546	8.4456	8.47591	9.12901	9.03544	9.14076	-1.5327	-0.61608	1.5327	down	9.17889e-10	2.88867e-08
55500	ETNK1	ethanolamine kinase 1	7.5821	7.45975	7.41858	8.39809	8.45129	8.35666	-1.88583	-0.915203	1.88583	down	6.47853e-11	3.61721e-09
359948	IRF2BP2	interferon regulatory factor 2 binding protein 2	6.86731	6.79357	6.79083	7.4122	7.42207	7.56743	-1.56916	-0.649997	1.56916	down	3.2815e-08	5.18641e-07
54793	KCTD9	potassium channel tetramerization domain containing 9	5.68891	5.46934	5.60741	6.25949	6.42181	6.50582	-1.74976	-0.807153	1.74976	down	1.28231e-07	1.59658e-06
595	CCND1	cyclin D1	7.88677	7.70729	7.73867	8.9368	8.90815	9.10166	-2.30478	-1.20463	2.30478	down	5.95338e-12	6.00024e-10
9467	SH3BP5	SH3-domain binding protein 5 (BTK-associated)	8.92679	8.96338	9.04688	8.27174	8.2022	8.26953	1.66001	0.731193	1.66001	up	1.25573e-10	6.04892e-09
342931	RFPL4A	ret finger protein-like 4A	4.10236	3.98005	3.94699	5.03392	4.46332	4.90766	-1.73127	-0.791833	1.73127	down	1.74262e-05	0.000102957
5191	PEX7	peroxisomal biogenesis factor 7	8.16233	8.10263	8.10528	7.15737	7.2981	7.22591	1.86127	0.896287	1.86127	up	7.24132e-11	3.95387e-09
50618	ITSN2	intersectin 2	7.09578	7.08129	7.0921	7.89352	7.94391	7.75113	-1.70897	-0.77313	1.70897	down	1.85633e-09	5.02527e-08
3953	LEPR	leptin receptor	6.1851	6.11727	6.2808	5.0986	5.32505	5.06293	2.04514	1.0322	2.04514	up	7.73069e-09	1.57609e-07
5127	CDK16	cyclin-dependent kinase 16	8.59521	8.62491	8.52674	9.28845	9.31671	9.28444	-1.64063	-0.714247	1.64063	down	3.63249e-11	2.26999e-09
116461	TSEN15	tRNA splicing endonuclease subunit 15	8.22923	8.06924	8.08228	8.92444	8.78636	9.06515	-1.73917	-0.7984	1.73917	down	4.46117e-09	1.01951e-07
1652	DDT	D-dopachrome tautomerase	9.49416	9.46608	9.49593	10.2246	10.1687	10.231	-1.65026	-0.722693	1.65026	down	2.19265e-12	2.8371e-10
9766	SUSD6	sushi domain containing 6	7.6209	7.57425	7.59411	8.29209	8.31365	8.38831	-1.66432	-0.73493	1.66432	down	2.59214e-10	1.07934e-08
332	BIRC5	baculoviral IAP repeat containing 5	10.3225	10.2679	10.253	9.56463	9.62284	9.53332	1.63301	0.70753	1.63301	up	7.25696e-12	6.90676e-10
58493	INIP	INTS3 and NABP interacting protein	6.8489	6.71084	6.86623	7.63384	7.72901	7.83636	-1.89791	-0.924413	1.89791	down	8.44648e-10	2.69924e-08
23478	SEC11A	SEC11 homolog A, signal peptidase complex subunit	10.6382	10.614	10.6389	9.85748	9.87669	9.84363	1.70655	0.771083	1.70655	up	1.91094e-13	5.05738e-11
57563	KLHL8	kelch like family member 8	5.99748	5.67611	5.79516	6.4627	6.34989	6.51513	-1.53651	-0.619657	1.53651	down	3.91254e-06	2.86388e-05
2309	FOXO3	forkhead box O3	8.17026	8.06009	8.05035	8.65446	8.70606	8.78825	-1.53974	-0.62269	1.53974	down	4.40595e-09	1.00806e-07
6595	SMARCA2	SWI/SNF related, matrix associated, actin dependent regulator of chromatin, subfamily a, member 2	7.70705	7.69633	7.5622	8.27857	8.31673	8.27857	-1.55412	-0.636097	1.55412	down	4.71855e-09	1.06045e-07
1389	CREBL2	cAMP responsive element binding protein-like 2	7.57774	7.52304	7.59874	6.44848	6.3766	6.46952	2.19615	1.13497	2.19615	up	9.66887e-12	8.48336e-10
81931	ZNF93	zinc finger protein 93	5.80265	5.5599	5.6128	6.26463	6.25916	6.32327	-1.54104	-0.623903	1.54104	down	1.2589e-06	1.09163e-05
11169	WDHD1	WD repeat and HMG-box DNA binding protein 1	5.18545	4.98188	4.76372	5.585	5.76605	5.57513	-1.58562	-0.665043	1.58562	down	1.44297e-05	8.76598e-05
10097	ACTR2	ARP2 actin-related protein 2 homolog (yeast)	8.55862	8.42593	8.4808	9.83266	9.68872	9.69914	-2.38126	-1.25172	2.38126	down	1.56137e-13	4.47975e-11
8476	CDC42BPA	CDC42 binding protein kinase alpha (DMPK-like)	5.3262	5.26649	5.25206	5.90354	5.90993	5.98602	-1.57089	-0.65158	1.57089	down	3.53111e-07	3.74117e-06
54997	TESC	tescalcin	5.92711	5.74782	5.87272	5.01693	5.16824	5.08546	1.69233	0.759007	1.69233	up	1.81238e-07	2.14641e-06
54014	BRWD1	bromodomain and WD repeat domain containing 1	4.87741	4.40647	4.51626	5.4855	5.44045	5.53466	-1.8491	-0.886823	1.8491	down	9.03589e-07	8.2426e-06
55664	CDC37L1	cell division cycle 37-like 1	4.87546	4.64544	4.77733	5.56824	5.60607	5.75813	-1.83791	-0.87807	1.83791	down	8.60876e-08	1.14668e-06
7832	BTG2	BTG family member 2	4.12895	4.0902	3.98013	4.83916	4.99084	4.94155	-1.8118	-0.857423	1.8118	down	1.10642e-07	1.4111e-06
83786	FRMD8	FERM domain containing 8	8.70007	8.95534	8.92522	9.77598	9.69373	9.59443	-1.77502	-0.827837	1.77502	down	1.50374e-09	4.2554e-08
9253	NUMBL	numb homolog (Drosophila)-like	8.47306	8.43464	8.48041	7.75389	7.82944	7.76789	1.60099	0.678963	1.60099	up	3.97214e-10	1.49696e-08
51099	ABHD5	abhydrolase domain containing 5	5.06334	4.8008	4.87675	5.63345	5.78088	5.92421	-1.82246	-0.865883	1.82246	down	2.60603e-07	2.89938e-06
200424	TET3	tet methylcytosine dioxygenase 3	7.07629	6.80201	6.95154	7.927	7.84417	8.04122	-1.99195	-0.994183	1.99195	down	1.05431e-09	3.22505e-08
3756	KCNH1	potassium channel, voltage gated eag related subfamily H, member 1	6.08307	5.93916	5.94378	7.0721	6.93105	7.23578	-2.13018	-1.09097	2.13018	down	1.35365e-09	3.9335e-08
344838	PAQR9	progestin and adipoQ receptor family member IX	5.18456	5.20393	5.24015	6.1636	6.18823	6.30689	-2.01395	-1.01003	2.01395	down	1.42028e-09	4.08988e-08
4919	ROR1	receptor tyrosine kinase-like orphan receptor 1	6.32279	6.2684	6.28254	7.01759	7.0202	7.16507	-1.71282	-0.776377	1.71282	down	7.10745e-09	1.47509e-07
5510	PPP1R7	protein phosphatase 1 regulatory subunit 7	9.07166	8.98641	9.08188	8.44846	8.44193	8.44039	1.51893	0.603057	1.51893	up	5.46051e-10	1.91811e-08
151648	SGOL1	shugoshin-like 1 (S. pombe)	4.62179	4.41118	4.66919	5.32461	5.09915	5.38659	-1.62758	-0.70273	1.62758	down	5.22095e-06	3.66464e-05
7052	TGM2	transglutaminase 2	10.2529	10.1853	10.2259	9.5633	9.50759	9.52902	1.61112	0.688067	1.61112	up	5.40942e-12	5.62508e-10
22862	FNDC3A	fibronectin type III domain containing 3A	8.1539	8.05129	8.07434	9.04287	9.07228	9.14766	-1.99229	-0.994427	1.99229	down	2.16528e-12	2.82601e-10
140739	UBE2F	ubiquitin conjugating enzyme E2F (putative)	7.88926	7.56491	7.83106	7.0797	7.0657	7.14358	1.58603	0.665417	1.58603	up	2.70886e-07	2.99514e-06
839	CASP6	caspase 6	7.14553	7.09367	7.09543	6.2007	6.58774	6.49182	1.60747	0.68479	1.60747	up	1.02317e-06	9.14457e-06
7534	YWHAZ	tyrosine 3-monooxygenase/tryptophan 5-monooxygenase activation protein, zeta	10.8738	10.8554	10.7908	11.5655	11.4887	11.4932	-1.5975	-0.67582	1.5975	down	2.16809e-12	2.82601e-10
55591	VEZT	vezatin, adherens junctions transmembrane protein	6.24869	6.15865	6.12634	7.01372	7.07399	7.04805	-1.82432	-0.86736	1.82432	down	1.22084e-09	3.63817e-08
9653	HS2ST1	heparan sulfate 2-O-sulfotransferase 1	7.81866	7.72238	7.67298	8.60034	8.65367	8.58882	-1.83562	-0.87627	1.83562	down	3.76598e-11	2.33485e-09
388650	FAM69A	family with sequence similarity 69 member A	4.48189	4.30503	4.64834	5.68299	5.65469	5.74669	-2.32361	-1.21637	2.32361	down	2.59243e-09	6.61693e-08
4811	NID1	nidogen 1	8.09075	7.84603	7.90735	8.82387	8.81651	9.01751	-1.91576	-0.93792	1.91576	down	7.6377e-10	2.50179e-08
55113	XKR8	X-linked Kx blood group related 8	8.11928	8.07105	8.07192	8.78076	8.76681	8.84485	-1.63587	-0.710057	1.63587	down	1.08187e-10	5.41824e-09
54165	DCUN1D1	DCN1, defective in cullin neddylation 1, domain containing 1	7.25218	7.03724	7.08589	7.76621	7.75008	7.83835	-1.57984	-0.659777	1.57984	down	3.49102e-08	5.44745e-07
6502	SKP2	S-phase kinase-associated protein 2, E3 ubiquitin protein ligase	5.42479	5.45707	5.20019	6.36922	6.1885	6.2584	-1.88081	-0.911357	1.88081	down	3.47364e-08	5.42465e-07
56852	RAD18	RAD18, E3 ubiquitin protein ligase	7.51302	7.4691	7.37425	8.20202	8.17542	8.28497	-1.70371	-0.76868	1.70371	down	6.6853e-10	2.25368e-08
102723478	LOC102723478	coxsackievirus and adenovirus receptor pseudogene	7.00498	6.9279	7.10445	6.33682	6.45578	6.4256	1.52243	0.606377	1.52243	up	2.61203e-07	2.90359e-06
51060	TXNDC12	thioredoxin domain containing 12 (endoplasmic reticulum)	8.58791	8.51829	8.53301	9.15122	9.18427	9.14143	-1.52898	-0.61257	1.52898	down	2.43833e-10	1.02726e-08
860	RUNX2	runt-related transcription factor 2	5.49071	5.32064	5.32058	6.01497	6.24463	6.21212	-1.71705	-0.77993	1.71705	down	2.12071e-07	2.44957e-06
11001	SLC27A2	solute carrier family 27 (fatty acid transporter), member 2	5.01577	4.65733	4.90383	4.28417	4.265	4.25321	1.50683	0.591517	1.50683	up	3.00972e-05	0.000164905
9092	SART1	squamous cell carcinoma antigen recognized by T-cells 1	8.07063	7.99117	8.03054	7.3075	7.46905	7.43461	1.54441	0.62706	1.54441	up	1.41709e-08	2.59681e-07
54566	EPB41L4B	erythrocyte membrane protein band 4.1 like 4B	8.97738	9.03022	8.88787	9.63417	9.54942	9.61677	-1.5529	-0.634963	1.5529	down	4.61272e-10	1.68037e-08
8226	PUDP	pseudouridine 5'-phosphatase	6.88269	6.97101	7.08484	8.18545	8.10549	8.21682	-2.28112	-1.18974	2.28112	down	8.00194e-12	7.40141e-10
51449	PCYOX1	prenylcysteine oxidase 1	7.64683	7.52053	7.6536	6.74698	6.9638	6.94192	1.65033	0.722753	1.65033	up	3.12451e-08	4.98251e-07
54468	MIOS	missing oocyte, meiosis regulator, homolog (Drosophila)	8.45483	8.47006	8.45708	9.05506	9.09004	9.17893	-1.56629	-0.647353	1.56629	down	3.13412e-10	1.24688e-08
314	AOC2	amine oxidase, copper containing 2 (retina-specific)	6.03928	6.28423	6.09874	5.49289	5.7042	5.42853	1.51454	0.598877	1.51454	up	1.019e-05	6.49695e-05
6249	CLIP1	CAP-Gly domain containing linker protein 1	7.76519	7.71067	7.75532	7.08105	7.05034	7.1772	1.55926	0.640863	1.55926	up	9.87033e-09	1.93793e-07
5306	PITPNA	phosphatidylinositol transfer protein alpha	9.73453	9.64731	9.70993	8.81619	8.79232	8.86857	1.82964	0.871563	1.82964	up	1.53894e-12	2.22393e-10
51661	FKBP7	FK506 binding protein 7	4.64544	5.23219	5.11233	5.65649	5.66541	5.7673	-1.62422	-0.699747	1.62422	down	4.50121e-05	0.000233631
5927	KDM5A	lysine (K)-specific demethylase 5A	5.45303	5.40191	5.48417	6.06305	6.11	6.15427	-1.58308	-0.662737	1.58308	down	2.14064e-07	2.46751e-06
445571	CBWD3	COBW domain containing 3	7.26746	7.15656	7.11384	7.97395	7.91583	7.91311	-1.68764	-0.75501	1.68764	down	1.30499e-09	3.83131e-08
57460	PPM1H	protein phosphatase, Mg2+/Mn2+ dependent 1H	6.45	6.3229	6.46503	5.68257	5.67857	5.71914	1.64629	0.719217	1.64629	up	6.16089e-08	8.71728e-07
84678	KDM2B	lysine (K)-specific demethylase 2B	5.0843	5.00909	4.70052	5.68119	5.49461	5.42477	-1.51805	-0.60222	1.51805	down	4.94237e-05	0.000253021
23041	MON2	MON2 homolog, regulator of endosome-to-Golgi trafficking	6.36801	6.44337	6.37838	7.18862	7.17961	7.31215	-1.77794	-0.830207	1.77794	down	1.92554e-09	5.18406e-08
79071	ELOVL6	ELOVL fatty acid elongase 6	5.43133	4.91304	5.11759	4.01614	4.01614	3.87748	2.27216	1.18407	2.27216	up	5.97351e-08	8.49497e-07
95681	CEP41	centrosomal protein 41kDa	7.31625	7.35316	7.15988	7.93003	8.04395	8.02611	-1.6513	-0.7236	1.6513	down	6.85927e-09	1.4349e-07
254427	PROSER2	proline and serine rich 2	6.88226	6.8176	6.70421	7.53044	7.43891	7.46744	-1.59945	-0.677573	1.59945	down	2.21911e-08	3.77604e-07
554313	HIST2H4B	histone cluster 2, H4b	7.65274	7.62805	7.85564	8.86352	8.74792	8.82317	-2.14265	-1.09939	2.14265	down	2.04912e-11	1.48385e-09
285958	SNHG15	small nucleolar RNA host gene 15	6.0345	6.05239	6.24721	4.91209	5.05438	4.94712	2.20407	1.14017	2.20407	up	1.32239e-09	3.86176e-08
283219	KCTD21	potassium channel tetramerization domain containing 21	6.70002	6.57108	6.59759	5.72139	5.5677	5.64153	1.97159	0.979357	1.97159	up	1.47611e-09	4.19788e-08
6574	SLC20A1	solute carrier family 20 (phosphate transporter), member 1	10.9482	10.8437	10.8498	11.5556	11.4527	11.6375	-1.58889	-0.66802	1.58889	down	1.38779e-10	6.51732e-09
81558	FAM117A	family with sequence similarity 117 member A	7.13931	7.00954	7.2264	6.5319	6.38944	6.6051	1.53291	0.61627	1.53291	up	7.20977e-07	6.82622e-06
3690	ITGB3	integrin beta 3	6.27151	5.93938	6.13613	6.88928	7.0732	7.3559	-1.98681	-0.990453	1.98681	down	1.77301e-07	2.10739e-06
25852	ARMC8	armadillo repeat containing 8	5.41741	5.37552	5.39362	6.04075	6.01623	6.08056	-1.56953	-0.65033	1.56953	down	2.32756e-07	2.63962e-06
728013	CBWD7	COBW domain containing 7	7.26746	7.15656	7.11384	7.97395	7.91583	7.91311	-1.68764	-0.75501	1.68764	down	1.30499e-09	3.83131e-08
84307	ZNF397	zinc finger protein 397	4.55825	4.77795	4.93561	5.30418	5.26332	5.46298	-1.50131	-0.586223	1.50131	down	4.36417e-05	0.000227464
84925	DIRC2	disrupted in renal carcinoma 2	6.79337	6.68091	6.6801	7.43016	7.44156	7.46014	-1.65385	-0.725827	1.65385	down	3.80983e-09	9.00631e-08
6717	SRI	sorcin	6.46975	6.42625	6.19943	7.26204	7.21471	7.28311	-1.85079	-0.888143	1.85079	down	5.98194e-09	1.2853e-07
4288	MKI67	marker of proliferation Ki-67	6.52084	6.5409	6.54739	7.68594	7.50983	7.36982	-1.97998	-0.985487	1.97998	down	1.47701e-09	4.19788e-08
4928	NUP98	nucleoporin 98kDa	7.23413	7.15606	7.18389	7.97474	7.79127	7.87938	-1.61377	-0.690437	1.61377	down	7.24648e-09	1.49833e-07
54807	ZNF586	zinc finger protein 586	6.04934	5.99352	6.16971	6.79123	6.72959	6.80471	-1.62938	-0.70432	1.62938	down	5.52782e-08	7.9474e-07
9650	MTFR1	mitochondrial fission regulator 1	8.4411	8.3306	8.34661	9.25762	9.24306	9.41348	-1.90785	-0.93195	1.90785	down	2.21141e-11	1.58332e-09
51538	ZCCHC17	zinc finger, CCHC domain containing 17	8.54503	8.53109	8.61129	9.40201	9.44855	9.49085	-1.84634	-0.884667	1.84634	down	2.36369e-12	3.01655e-10
48	ACO1	aconitase 1	8.27348	8.39992	8.44537	7.71095	7.69506	7.59323	1.63185	0.70651	1.63185	up	3.16758e-09	7.78461e-08
342371	ATXN1L	ataxin 1-like	8.92902	8.90514	8.87141	9.58743	9.61497	9.7107	-1.66537	-0.735843	1.66537	down	2.89134e-11	1.90687e-09
23048	FNBP1	formin binding protein 1	6.58632	6.23491	6.55069	5.59298	5.58123	5.59871	1.82302	0.866333	1.82302	up	1.05504e-07	1.3572e-06
3770	KCNJ14	potassium channel, inwardly rectifying subfamily J, member 14	6.48738	6.43486	6.43673	5.77104	5.66028	5.7953	1.63669	0.710783	1.63669	up	6.14144e-08	8.69288e-07
28962	OSTM1	osteopetrosis associated transmembrane protein 1	7.62127	7.59879	7.59057	8.18165	8.16109	8.35465	-1.54641	-0.62892	1.54641	down	1.5956e-08	2.87698e-07
80143	SIKE1	suppressor of IKBKE 1	7.09633	7.04861	6.9975	8.25502	8.39359	8.29334	-2.40578	-1.2665	2.40578	down	8.17086e-13	1.3964e-10
23037	PDZD2	PDZ domain containing 2	5.25832	4.88897	5.04133	5.70743	5.54103	5.76162	-1.52325	-0.607153	1.52325	down	2.45099e-05	0.000138282
4552	MTRR	5-methyltetrahydrofolate-homocysteine methyltransferase reductase	8.86446	8.85314	8.76385	9.77444	9.77632	9.83422	-1.95591	-0.967843	1.95591	down	4.2105e-13	8.35868e-11
51706	CYB5R1	cytochrome b5 reductase 1	8.29606	8.24762	8.2188	7.60673	7.50257	7.56607	1.61967	0.695703	1.61967	up	8.55053e-10	2.72142e-08
80723	SLC35G2	solute carrier family 35 member G2	5.02645	5.20408	5.07986	5.92026	6.11307	6.10919	-1.92391	-0.944043	1.92391	down	1.66481e-08	2.97157e-07
654364	NME1-NME2	NME1-NME2 readthrough	11.5575	11.5298	11.5504	12.5831	12.612	12.6793	-2.11244	-1.07891	2.11244	down	3.22771e-16	7.92947e-13
91612	CHURC1	churchill domain containing 1	6.4032	6.37881	6.42861	7.12521	7.16162	7.13095	-1.66523	-0.73572	1.66523	down	3.7786e-09	8.94733e-08
4983	OPHN1	oligophrenin 1	4.77654	4.43769	4.66281	5.3312	4.82929	5.50913	-1.51312	-0.597527	1.51312	down	0.000876323	0.00313941
728492	SERF1B	small EDRK-rich factor 1B (centromeric)	4.12724	4.00167	4.39497	4.91435	4.60213	5.10343	-1.62302	-0.698677	1.62302	down	7.68129e-05	0.000373535
135228	CD109	CD109 molecule	8.7915	8.7498	8.69513	9.66818	9.78904	9.71135	-1.96889	-0.97738	1.96889	down	8.84775e-13	1.47364e-10
116138	KLHDC3	kelch domain containing 3	9.9096	9.82835	9.89504	10.6968	10.7433	10.791	-1.82266	-0.866047	1.82266	down	3.16206e-13	6.98264e-11
5106	PCK2	phosphoenolpyruvate carboxykinase 2 (mitochondrial)	6.69548	6.49221	6.4193	7.55461	7.61148	7.50848	-2.03147	-1.02253	2.03147	down	6.77225e-10	2.2713e-08
81611	ANP32E	acidic nuclear phosphoprotein 32 family member E	10.2457	10.3048	10.2328	11.2069	11.2346	11.0712	-1.87883	-0.909833	1.87883	down	9.86232e-13	1.5953e-10
6495	SIX1	SIX homeobox 1	4.72601	4.51772	4.81387	3.90721	4.20611	4.06888	1.54235	0.625133	1.54235	up	3.30838e-05	0.000179073
573	BAG1	BCL2 associated athanogene 1	6.7732	6.9203	6.67113	6.00046	5.73468	6.11058	1.7896	0.839637	1.7896	up	3.04649e-07	3.29976e-06
148534	TMEM56	transmembrane protein 56	7.20459	7.16271	7.22114	6.04991	6.39124	6.22893	1.96263	0.972787	1.96263	up	4.81143e-09	1.07517e-07
6238	RRBP1	ribosome binding protein 1	8.77062	8.67799	8.72352	7.90628	7.83588	8.02374	1.74361	0.802077	1.74361	up	2.83998e-10	1.1568e-08
6747	SSR3	signal sequence receptor, gamma (translocon-associated protein gamma)	7.96414	7.98043	8.05363	8.78565	8.42073	8.6313	-1.52961	-0.61316	1.52961	down	4.73345e-07	4.7916e-06
83939	EIF2A	eukaryotic translation initiation factor 2A, 65kDa	10.1816	10.193	10.3182	9.50154	9.55176	9.53971	1.62442	0.699923	1.62442	up	3.62744e-11	2.26999e-09
7411	VBP1	von Hippel-Lindau binding protein 1	9.22175	9.09225	9.31944	9.83851	9.87247	9.87141	-1.56879	-0.64965	1.56879	down	1.5302e-09	4.31475e-08
5411	PNN	pinin, desmosome associated protein	9.6716	9.68173	9.57846	10.4217	10.4263	10.32	-1.67648	-0.745433	1.67648	down	1.48279e-11	1.17745e-09
66036	MTMR9	myotubularin related protein 9	6.24007	6.01315	6.29749	7.32188	7.30152	7.44219	-2.25266	-1.17163	2.25266	down	3.0604e-10	1.22625e-08
100528017	SAA2-SAA4	SAA2-SAA4 readthrough	6.8216	6.77546	7.03532	7.91992	7.73216	7.92613	-1.97512	-0.981943	1.97512	down	1.88862e-09	5.09862e-08
23598	PATZ1	POZ (BTB) and AT hook containing zinc finger 1	6.83663	6.69897	6.81117	7.34511	7.50162	7.52537	-1.59672	-0.67511	1.59672	down	4.81085e-08	7.08917e-07
79772	MCTP1	multiple C2 domains, transmembrane 1	5.51836	5.33934	5.42915	5.88524	6.16161	6.23883	-1.58697	-0.666277	1.58697	down	4.67659e-06	3.34041e-05
8503	PIK3R3	phosphoinositide-3-kinase regulatory subunit 3	6.79506	6.74268	6.79039	7.45516	7.53399	7.4597	-1.6323	-0.706907	1.6323	down	3.4717e-09	8.33611e-08
123283	TARSL2	threonyl-tRNA synthetase-like 2	5.62144	5.37973	5.46513	4.57253	4.83168	4.94205	1.63204	0.70668	1.63204	up	6.61788e-06	4.49118e-05
116442	RAB39B	RAB39B, member RAS oncogene family	4.9655	4.83078	4.86218	5.64249	5.71661	5.81348	-1.78762	-0.83804	1.78762	down	5.58134e-08	8.00095e-07
55154	MSTO1	misato 1, mitochondrial distribution and morphology regulator	6.54939	6.30291	6.50651	7.19228	7.17755	7.14117	-1.64421	-0.717397	1.64421	down	5.75622e-08	8.22762e-07
11031	RAB31	RAB31, member RAS oncogene family	7.98332	7.91417	7.83296	8.49256	8.66238	8.62342	-1.60507	-0.682637	1.60507	down	4.6637e-09	1.05223e-07
79850	FAM57A	family with sequence similarity 57 member A	8.80616	8.87781	8.834	10.3852	10.3822	10.5043	-2.99923	-1.58459	2.99923	down	4.91513e-16	8.78177e-13
23678	SGK3	serum/glucocorticoid regulated kinase family member 3	4.97762	4.82531	4.81387	5.86425	5.87171	5.97527	-2.04412	-1.03148	2.04412	down	3.27867e-09	7.96999e-08
57157	PHTF2	putative homeodomain transcription factor 2	4.40466	4.32529	4.21425	5.10816	5.04976	4.99182	-1.66461	-0.73518	1.66461	down	6.27172e-07	6.0675e-06
284273	ZADH2	zinc binding alcohol dehydrogenase domain containing 2	6.41996	6.23107	6.35906	6.93228	6.9834	7.08278	-1.58314	-0.66279	1.58314	down	1.43644e-07	1.75839e-06
84327	ZBED3	zinc finger, BED-type containing 3	6.3012	5.93798	6.15434	7.15245	7.14277	7.30152	-2.09615	-1.06774	2.09615	down	4.15993e-09	9.65257e-08
57565	KLHL14	kelch like family member 14	4.03883	4.10918	4.10544	4.58317	4.95788	4.90897	-1.66116	-0.73219	1.66116	down	4.99813e-06	3.53602e-05
171425	CLYBL	citrate lyase beta like	5.84346	5.75273	5.78193	5.31851	5.0123	4.94404	1.62573	0.70109	1.62573	up	3.43693e-06	2.56787e-05
11329	STK38	serine/threonine kinase 38	8.79634	8.74067	8.84785	9.42869	9.4395	9.44218	-1.56031	-0.641837	1.56031	down	1.11233e-10	5.52051e-09
55031	USP47	ubiquitin specific peptidase 47	6.62789	6.71531	6.77505	7.74006	7.57466	7.80821	-2.00216	-1.00156	2.00216	down	4.4846e-10	1.65064e-08
51290	ERGIC2	ERGIC and golgi 2	9.91829	9.81632	9.90328	9.16743	9.32803	9.21407	1.56134	0.642787	1.56134	up	6.24229e-10	2.14106e-08
83548	COG3	component of oligomeric golgi complex 3	3.99484	3.58263	3.76036	4.4113	4.34971	4.44808	-1.54088	-0.623753	1.54088	down	3.99483e-05	0.000210856
740	MRPL49	mitochondrial ribosomal protein L49	10.545	10.5097	10.578	9.52491	9.56246	9.62111	1.96526	0.974723	1.96526	up	6.8127e-14	2.37898e-11
5563	PRKAA2	protein kinase, AMP-activated, alpha 2 catalytic subunit	6.76377	6.41899	6.65903	5.13637	5.23938	5.38248	2.56896	1.36119	2.56896	up	6.11859e-10	2.10783e-08
8614	STC2	stanniocalcin 2	8.95454	8.93939	8.83884	10.0733	9.91522	10.2717	-2.2592	-1.17581	2.2592	down	3.81651e-11	2.35503e-09
83667	SESN2	sestrin 2	7.17013	7.1179	7.08352	8.61201	8.44367	8.63214	-2.71087	-1.43876	2.71087	down	2.79878e-13	6.39419e-11
5155	PDGFB	platelet-derived growth factor beta polypeptide	8.35493	8.377	8.31793	9.02874	8.99152	8.97148	-1.56623	-0.647293	1.56623	down	1.67989e-10	7.58112e-09
94239	H2AFV	H2A histone family member V	8.10549	7.97677	7.9731	8.62521	8.66469	8.57417	-1.51877	-0.602903	1.51877	down	5.7901e-09	1.25395e-07
10311	DSCR3	Down syndrome critical region 3	8.46465	8.24169	8.41954	7.34193	7.35397	7.51693	1.96022	0.971017	1.96022	up	3.87148e-10	1.47172e-08
1176	AP3S1	adaptor-related protein complex 3, sigma 1 subunit	10.9495	10.884	10.9292	9.7962	9.8487	9.80561	2.14959	1.10406	2.14959	up	2.47738e-15	3.24595e-12
100526837	EEF1E1-BLOC1S5	EEF1E1-BLOC1S5 readthrough (NMD candidate)	6.27029	6.21243	6.13448	6.80096	6.93961	6.93281	-1.60814	-0.685393	1.60814	down	6.90811e-08	9.56453e-07
9125	RQCD1	RCD1 required for cell differentiation1 homolog (S. pombe)	7.0696	6.88114	6.90304	7.62755	7.7475	7.63162	-1.64448	-0.71763	1.64448	down	1.61316e-08	2.90399e-07
6785	ELOVL4	ELOVL fatty acid elongase 4	5.20975	5.44525	5.56446	4.24913	4.22469	4.3212	2.20607	1.14148	2.20607	up	9.73864e-09	1.91303e-07
23116	FAM179B	family with sequence similarity 179 member B	8.05412	8.01826	8.09854	8.64247	8.62274	8.78415	-1.54344	-0.626147	1.54344	down	4.77391e-09	1.06938e-07
64710	NUCKS1	nuclear casein kinase and cyclin-dependent kinase substrate 1	8.7717	8.64874	8.73223	9.94318	9.9039	9.88548	-2.28675	-1.1933	2.28675	down	2.81209e-14	1.25608e-11
6576	SLC25A1	solute carrier family 25 (mitochondrial carrier; citrate transporter), member 1	9.64269	9.62551	9.69909	8.91784	8.97463	9.01333	1.61011	0.687163	1.61011	up	4.1799e-11	2.53158e-09
122953	JDP2	Jun dimerization protein 2	5.79551	5.64006	5.69783	6.88414	6.89182	6.96293	-2.30031	-1.20183	2.30031	down	4.58103e-11	2.72004e-09
79139	DERL1	derlin 1	7.16323	7.11379	7.08264	8.56721	8.62859	8.61779	-2.79848	-1.48464	2.79848	down	1.68102e-14	9.17722e-12
5019	OXCT1	3-oxoacid CoA-transferase 1	7.69134	7.69478	7.55298	8.61451	8.66028	8.57711	-1.96011	-0.970933	1.96011	down	1.49337e-11	1.18347e-09
29103	DNAJC15	DnaJ heat shock protein family (Hsp40) member C15	5.08779	5.0589	5.06148	5.88541	5.75974	6.06146	-1.78116	-0.832813	1.78116	down	1.16992e-07	1.47641e-06
127262	TPRG1L	tumor protein p63 regulated 1-like	7.54914	7.48319	7.69685	8.53939	8.49186	8.61893	-1.96383	-0.973667	1.96383	down	8.52858e-11	4.51796e-09
84100	ARL6	ADP ribosylation factor like GTPase 6	5.83257	6.00773	5.77537	5.07941	4.90895	4.95352	1.8548	0.891263	1.8548	up	5.04349e-08	7.36694e-07
63908	NAPB	N-ethylmaleimide-sensitive factor attachment protein, beta	4.29783	4.51725	4.58858	5.2602	4.96894	4.93884	-1.50327	-0.588107	1.50327	down	7.05963e-05	0.00034691
10236	HNRNPR	heterogeneous nuclear ribonucleoprotein R	6.17668	6.10479	6.23054	6.75798	6.83515	6.71756	-1.51525	-0.59956	1.51525	down	2.87187e-07	3.14354e-06
2683	B4GALT1	UDP-Gal:betaGlcNAc beta 1,4- galactosyltransferase, polypeptide 1	6.74537	6.7501	6.74711	8.2858	8.12074	8.25953	-2.77887	-1.4745	2.77887	down	1.61735e-13	4.55983e-11
10282	BET1	Bet1 golgi vesicular membrane trafficking protein	7.96386	7.81264	7.8619	8.74266	8.69999	8.77156	-1.81328	-0.858603	1.81328	down	4.40166e-11	2.65362e-09
1398	CRK	v-crk avian sarcoma virus CT10 oncogene homolog	9.27999	9.16197	9.22483	10.0656	10.1621	10.1595	-1.87486	-0.906783	1.87486	down	1.4128e-12	2.05705e-10
145282	MIPOL1	mirror-image polydactyly 1	5.61286	5.41584	5.69117	4.90968	4.96743	4.96743	1.54233	0.62511	1.54233	up	4.16198e-06	3.01114e-05
25915	NDUFAF3	NADH dehydrogenase (ubiquinone) complex I, assembly factor 3	9.59192	9.47996	9.5524	8.91012	8.86938	8.91123	1.56322	0.644517	1.56322	up	1.21112e-10	5.9064e-09
10625	IVNS1ABP	influenza virus NS1A binding protein	10.8637	10.8551	10.8749	10.2232	10.2309	10.2486	1.54792	0.630333	1.54792	up	1.36477e-12	2.01673e-10
467	ATF3	activating transcription factor 3	6.21422	6.15824	6.16023	7.16668	7.08066	7.34769	-2.02902	-1.02078	2.02902	down	8.45963e-10	2.70124e-08
55003	PAK1IP1	PAK1 interacting protein 1	8.42973	8.33243	8.32535	9.18588	9.12404	9.29024	-1.78701	-0.83755	1.78701	down	6.2402e-11	3.51409e-09
64151	NCAPG	non-SMC condensin I complex subunit G	5.9632	5.75632	5.68342	6.5829	6.58875	6.64157	-1.74524	-0.803427	1.74524	down	5.9025e-08	8.40919e-07
4300	MLLT3	myeloid/lymphoid or mixed-lineage leukemia; translocated to, 3	6.31463	6.35551	6.20179	5.59803	5.70261	5.59748	1.57782	0.657937	1.57782	up	3.2499e-07	3.48836e-06
121260	SLC15A4	solute carrier family 15 (oligopeptide transporter), member 4	8.82011	8.72363	8.87116	7.8544	7.8751	7.86446	1.91894	0.940313	1.91894	up	7.8025e-12	7.33715e-10
377	ARF3	ADP ribosylation factor 3	8.46959	8.5115	8.34224	9.66578	9.59759	9.63103	-2.28209	-1.19036	2.28209	down	2.0068e-13	5.18346e-11
115572	FAM46B	family with sequence similarity 46 member B	4.90069	4.93556	5.12787	5.65591	5.73072	5.81451	-1.67676	-0.745673	1.67676	down	4.61967e-07	4.69698e-06
3184	HNRNPD	heterogeneous nuclear ribonucleoprotein D	7.83029	7.87172	7.82391	8.42714	8.51054	8.46151	-1.54159	-0.624423	1.54159	down	1.21217e-09	3.62019e-08
79149	ZSCAN5A	zinc finger and SCAN domain containing 5A	5.83754	5.6982	5.91135	5.14661	4.95916	5.22529	1.63053	0.705343	1.63053	up	1.53404e-06	1.28705e-05
57544	TXNDC16	thioredoxin domain containing 16	5.70453	5.71904	5.70461	6.47307	6.59737	6.81076	-1.88907	-0.917673	1.88907	down	2.15413e-08	3.68301e-07
5525	PPP2R5A	protein phosphatase 2 regulatory subunit B', alpha	8.56814	8.49658	8.59559	7.59445	7.54378	7.52375	1.99923	0.999443	1.99923	up	3.81011e-12	4.36257e-10
153642	ARSK	arylsulfatase family member K	6.29895	6.06881	6.09758	6.76464	6.73262	6.86525	-1.55013	-0.63239	1.55013	down	6.41568e-07	6.18395e-06
11216	AKAP10	A-kinase anchoring protein 10	5.75794	5.3245	5.416	6.07951	6.31426	6.35067	-1.68024	-0.748667	1.68024	down	5.73536e-06	3.96971e-05
143458	LDLRAD3	low density lipoprotein receptor class A domain containing 3	7.2349	7.16463	7.11992	7.82285	7.81357	7.87603	-1.58484	-0.664333	1.58484	down	4.34125e-09	9.97321e-08
200844	C3orf67	chromosome 3 open reading frame 67	4.39455	4.32374	4.39732	4.98188	4.70553	5.31967	-1.54809	-0.63049	1.54809	down	0.000154875	0.000690135
677800	SNORA12	small nucleolar RNA, H/ACA box 12	8.08331	7.87092	7.93324	7.3263	7.30506	7.37285	1.54516	0.627753	1.54516	up	3.50637e-08	5.46057e-07
57600	FNIP2	folliculin interacting protein 2	5.28398	5.07271	5.48258	6.82347	6.92285	7.29292	-3.32493	-1.73332	3.32493	down	4.55007e-10	1.66217e-08
55005	RMND1	required for meiotic nuclear division 1 homolog	3.99599	3.51765	3.68644	4.50939	4.37491	4.60504	-1.69712	-0.763087	1.69712	down	1.32206e-05	8.12734e-05
80315	CPEB4	cytoplasmic polyadenylation element binding protein 4	5.94062	5.4598	5.3252	6.06632	6.31495	6.13886	-1.5138	-0.59817	1.5138	down	0.000295507	0.00121071
9144	SYNGR2	synaptogyrin 2	9.82766	9.7848	9.89515	11.0791	11.0491	11.0903	-2.35698	-1.23694	2.35698	down	1.17464e-15	1.77583e-12
2332	FMR1	fragile X mental retardation 1	6.85111	6.72227	6.77358	7.4053	7.41967	7.37058	-1.53283	-0.616197	1.53283	down	3.37408e-08	5.30076e-07
162394	SLFN5	schlafen family member 5	6.23367	5.97392	6.10344	5.39264	5.57967	5.5702	1.50473	0.589507	1.50473	up	6.86864e-06	4.63654e-05
677823	SNORA80E	small nucleolar RNA, H/ACA box 80E	7.9479	7.85185	7.8186	7.20541	7.25032	7.21	1.57012	0.650873	1.57012	up	5.87987e-09	1.2678e-07
255967	PAN3	PAN3 poly(A) specific ribonuclease subunit	8.32516	8.22362	8.30675	9.24852	9.20397	9.24296	-1.92738	-0.94664	1.92738	down	1.39489e-12	2.04586e-10
115294	PCMTD1	protein-L-isoaspartate (D-aspartate) O-methyltransferase domain containing 1	7.47632	7.35748	7.54487	8.09607	8.12763	8.18216	-1.5974	-0.67573	1.5974	down	6.83624e-09	1.4316e-07
23568	ARL2BP	ADP ribosylation factor like GTPase 2 binding protein	9.89633	9.87053	9.84622	9.11663	9.06632	9.17188	1.685	0.75275	1.685	up	7.03739e-12	6.73038e-10
9948	WDR1	WD repeat domain 1	8.86601	8.81508	8.95402	7.5962	7.61779	7.57177	2.43364	1.28312	2.43364	up	1.15692e-13	3.51596e-11
79649	MAP7D3	MAP7 domain containing 3	6.45808	6.47644	6.1962	7.03352	7.02261	6.89108	-1.5215	-0.605497	1.5215	down	2.05974e-06	1.65094e-05
54453	RIN2	Ras and Rab interactor 2	10.2536	10.2474	10.2492	9.51285	9.53776	9.48298	1.66887	0.738873	1.66887	up	9.79285e-13	1.59061e-10
6352	CCL5	chemokine (C-C motif) ligand 5	4.93552	5.12104	5.05754	6.02796	5.77706	6.09075	-1.90161	-0.927223	1.90161	down	7.75007e-08	1.05263e-06
79844	ZDHHC11	zinc finger, DHHC-type containing 11	4.8493	4.76019	4.90988	3.20243	3.76668	4.03219	2.25432	1.17269	2.25432	up	2.34618e-06	1.84812e-05
8019	BRD3	bromodomain containing 3	8.19912	8.10429	8.05793	8.72971	8.73637	8.88536	-1.58377	-0.663367	1.58377	down	4.36231e-09	1.00157e-07
55635	DEPDC1	DEP domain containing 1	7.72694	7.67664	7.64225	9.04113	8.98512	9.01741	-2.51858	-1.33261	2.51858	down	2.15196e-14	1.02586e-11
57609	DIP2B	disco interacting protein 2 homolog B	7.40168	7.27749	7.21145	8.03154	7.97961	8.08435	-1.66435	-0.73496	1.66435	down	3.61759e-09	8.6083e-08
642443	ADH5P4	alcohol dehydrogenase 5 (class III), chi polypeptide, pseudogene 4	6.47633	6.53954	6.43412	7.55701	7.62261	7.44157	-2.0807	-1.05707	2.0807	down	8.83999e-11	4.64319e-09
124976	SPNS2	spinster homolog 2 (Drosophila)	7.75127	7.73482	7.9325	7.19329	7.10761	7.28233	1.52815	0.611787	1.52815	up	1.67539e-07	2.00715e-06
158747	MOSPD2	motile sperm domain containing 2	7.25486	7.21958	7.06421	6.04432	6.28444	6.36224	1.93082	0.949217	1.93082	up	1.36496e-08	2.51867e-07
84869	CBR4	carbonyl reductase 4	6.15824	6.34458	6.01687	7.10582	7.07523	7.151	-1.91514	-0.937453	1.91514	down	7.42274e-09	1.52837e-07
201627	DENND6A	DENN/MADD domain containing 6A	7.19299	7.03849	7.19986	7.98336	8.01834	8.03512	-1.82576	-0.868493	1.82576	down	2.56841e-10	1.07286e-08
10809	STARD10	StAR related lipid transfer domain containing 10	8.17183	8.22718	8.23604	7.46484	7.67731	7.64916	1.53111	0.61458	1.53111	up	3.80039e-08	5.85352e-07
221710	SMIM13	small integral membrane protein 13	5.70683	5.56256	5.68206	6.52891	6.53994	6.52752	-1.84247	-0.88164	1.84247	down	3.75471e-09	8.89611e-08
130872	AHSA2	AHA1, activator of heat shock 90kDa protein ATPase homolog 2 (yeast)	5.90779	6.01315	5.81385	6.50472	6.56082	6.81489	-1.64173	-0.715213	1.64173	down	8.07205e-07	7.49382e-06
9060	PAPSS2	3'-phosphoadenosine 5'-phosphosulfate synthase 2	7.46831	7.36378	7.40148	8.0916	8.16366	8.1005	-1.63285	-0.707397	1.63285	down	9.71197e-10	3.01126e-08
3759	KCNJ2	potassium channel, inwardly rectifying subfamily J, member 2	7.61018	7.61671	7.52424	8.29118	8.36677	8.46288	-1.72895	-0.7899	1.72895	down	5.11611e-10	1.8199e-08
5581	PRKCE	protein kinase C, epsilon	8.09822	8.01084	8.04125	9.07681	8.97037	9.13929	-2.01678	-1.01205	2.01678	down	4.84166e-12	5.22833e-10
5359	PLSCR1	phospholipid scramblase 1	5.8115	5.28067	5.75097	6.42071	6.43702	6.50382	-1.78939	-0.83947	1.78939	down	2.38295e-06	1.87408e-05
10793	ZNF273	zinc finger protein 273	4.6162	4.75388	4.91214	5.73478	5.78759	5.67594	-1.9616	-0.97203	1.9616	down	2.52507e-08	4.19474e-07
51809	GALNT7	polypeptide N-acetylgalactosaminyltransferase 7	9.43273	9.35743	9.4208	10.0231	10.016	10.0633	-1.5481	-0.6305	1.5481	down	3.02428e-11	1.9714e-09
5577	PRKAR2B	protein kinase, cAMP-dependent, regulatory subunit type II beta	5.15943	5.12902	5.26545	4.55631	4.48165	4.54813	1.57564	0.655937	1.57564	up	1.29359e-06	1.11727e-05
7693	ZNF134	zinc finger protein 134	7.39306	7.17104	7.39725	6.47192	6.5559	6.67192	1.68631	0.75387	1.68631	up	6.63577e-08	9.27239e-07
6322	SCML1	sex comb on midleg-like 1 (Drosophila)	5.42486	5.00521	5.39773	5.95811	5.98628	6.19454	-1.70572	-0.770377	1.70572	down	4.45563e-06	3.19769e-05
23344	ESYT1	extended synaptotagmin-like protein 1	10.5588	10.5096	10.597	9.58151	9.57556	9.66562	1.92857	0.947533	1.92857	up	1.57968e-13	4.49947e-11
84263	HSDL2	hydroxysteroid dehydrogenase like 2	7.49254	7.48395	7.48964	8.79382	8.80595	8.78227	-2.47136	-1.3053	2.47136	down	2.1662e-14	1.02586e-11
3716	JAK1	Janus kinase 1	8.86669	8.6192	8.9208	9.42196	9.37748	9.49233	-1.54581	-0.62836	1.54581	down	7.81996e-08	1.06066e-06
2287	FKBP3	FK506 binding protein 3	10.1303	10.104	10.2144	9.02744	9.1376	8.98627	2.14223	1.09911	2.14223	up	3.10762e-13	6.98006e-11
64798	DEPTOR	DEP domain containing MTOR-interacting protein	4.04566	3.88662	3.54329	4.48567	4.75762	4.7624	-1.79424	-0.843373	1.79424	down	7.87934e-06	5.21579e-05
79094	CHAC1	ChaC glutathione-specific gamma-glutamylcyclotransferase 1	5.54698	5.71823	5.6982	6.49459	6.5634	6.64466	-1.88306	-0.91308	1.88306	down	6.04063e-09	1.29536e-07
4154	MBNL1	muscleblind like splicing regulator 1	7.05653	6.89803	7.12707	6.27214	6.2808	6.51047	1.5941	0.67274	1.5941	up	6.4227e-07	6.18919e-06
8717	TRADD	TNFRSF1A-associated via death domain	9.07133	9.04168	9.08415	7.96146	7.90164	7.9682	2.17641	1.12195	2.17641	up	1.25382e-13	3.76213e-11
55075	UACA	uveal autoantigen with coiled-coil domains and ankyrin repeats	4.5756	4.73085	4.872	5.83235	5.80908	5.89065	-2.17027	-1.11788	2.17027	down	3.49717e-09	8.38701e-08
80071	CCDC15	coiled-coil domain containing 15	4.76845	4.4915	4.34682	5.08837	5.29853	5.46326	-1.67923	-0.747797	1.67923	down	1.48427e-05	8.97295e-05
222236	NAPEPLD	N-acyl phosphatidylethanolamine phospholipase D	4.72344	4.63295	5.10577	5.47602	5.67996	5.58393	-1.69261	-0.75925	1.69261	down	7.7667e-06	5.1525e-05
84296	GINS4	GINS complex subunit 4 (Sld5 homolog)	4.05984	4.04234	4.03017	5.01263	4.40705	4.70912	-1.5861	-0.665483	1.5861	down	9.21944e-05	0.000439099
25932	CLIC4	chloride intracellular channel 4	8.849	8.8233	8.87724	9.63167	9.5524	9.60127	-1.67628	-0.745267	1.67628	down	8.72059e-12	7.86193e-10
55038	CDCA4	cell division cycle associated 4	6.00695	5.85217	6.09615	6.76904	6.96494	7.05273	-1.92361	-0.943813	1.92361	down	1.82004e-08	3.19092e-07
8706	B3GALNT1	beta-1,3-N-acetylgalactosaminyltransferase 1 (globoside blood group)	8.30596	8.17645	8.22923	9.00344	9.07998	9.07998	-1.76205	-0.817253	1.76205	down	3.31368e-11	2.10422e-09
10075	HUWE1	HECT, UBA and WWE domain containing 1, E3 ubiquitin protein ligase	4.70349	4.71122	4.5512	5.35995	5.29475	5.41795	-1.62704	-0.702247	1.62704	down	7.17246e-07	6.79836e-06
79794	C12orf49	chromosome 12 open reading frame 49	6.10767	5.97667	5.8134	6.99766	6.86937	6.96293	-1.96892	-0.977407	1.96892	down	4.56675e-09	1.03581e-07
4323	MMP14	matrix metallopeptidase 14 (membrane-inserted)	6.05464	5.86603	5.91694	6.59623	6.51515	6.55195	-1.52475	-0.608573	1.52475	down	5.6478e-07	5.54164e-06
10874	NMU	neuromedin U	8.38347	8.31856	8.31806	8.92737	8.93602	8.99575	-1.52945	-0.613017	1.52945	down	5.52742e-10	1.93218e-08
6016	RIT1	Ras-like without CAAX 1	7.57103	7.39959	7.54449	6.33923	6.9441	7.15138	1.61716	0.693467	1.61716	up	0.000223278	0.00095168
401509	ZNF658B	zinc finger protein 658B, pseudogene	6.01253	5.91455	5.97232	5.01374	5.2117	5.34082	1.71441	0.777713	1.71441	up	3.92429e-07	4.08615e-06
5343	PLGLB1	plasminogen-like B1	4.78322	4.61183	4.39605	4.09497	3.97231	3.90121	1.52366	0.607537	1.52366	up	5.02927e-05	0.000256701
56946	EMSY	EMSY, BRCA2-interacting transcriptional repressor	7.35641	7.26264	7.17262	7.83483	7.90775	7.98726	-1.56489	-0.646057	1.56489	down	3.26615e-08	5.16838e-07
84132	USP42	ubiquitin specific peptidase 42	6.02841	6.13669	6.07507	5.38865	5.48114	5.51802	1.53416	0.617453	1.53416	up	7.50895e-07	7.05773e-06
387763	C11orf96	chromosome 11 open reading frame 96	4.70052	4.32094	4.46463	5.26595	4.83917	5.43149	-1.60604	-0.683507	1.60604	down	0.00016429	0.000726897
5342	PLGLB2	plasminogen-like B2	4.78322	4.61183	4.39605	4.09497	3.97231	3.90121	1.52366	0.607537	1.52366	up	5.02927e-05	0.000256701
9777	TM9SF4	transmembrane 9 superfamily protein member 4	7.033	6.75216	6.97551	7.60364	7.44054	7.64945	-1.563	-0.64432	1.563	down	6.42982e-07	6.19301e-06
8293	SERF1A	small EDRK-rich factor 1A (telomeric)	4.12724	4.00167	4.39497	4.91435	4.60213	5.10343	-1.62302	-0.698677	1.62302	down	7.68129e-05	0.000373535
51501	C11orf73	chromosome 11 open reading frame 73	8.78569	8.78997	8.83004	9.59711	9.61408	9.67383	-1.7733	-0.82644	1.7733	down	2.00322e-12	2.66917e-10
1965	EIF2S1	eukaryotic translation initiation factor 2 subunit alpha	9.85089	9.77836	9.85329	8.43696	8.53188	8.51714	2.51784	1.33219	2.51784	up	6.81658e-15	5.93614e-12
153443	SRFBP1	serum response factor binding protein 1	6.13922	5.87218	5.92802	6.57336	6.91041	6.8169	-1.72558	-0.787083	1.72558	down	5.51866e-07	5.43664e-06
5910	RAP1GDS1	RAP1, GTP-GDP dissociation stimulator 1	8.88672	8.82259	8.89854	8.2963	8.23832	8.30105	1.50601	0.590727	1.50601	up	1.10492e-09	3.35633e-08
55209	SETD5	SET domain containing 5	7.62768	7.47676	7.5831	8.14715	8.10549	8.26525	-1.52638	-0.610117	1.52638	down	3.30589e-08	5.21448e-07
1746	DLX2	distal-less homeobox 2	5.85034	5.80815	5.75636	6.60581	6.46594	6.64433	-1.70182	-0.767077	1.70182	down	3.45933e-08	5.40659e-07
3655	ITGA6	integrin alpha 6	8.28052	8.13955	8.19535	9.1942	9.15018	9.26585	-1.9976	-0.99827	1.9976	down	3.60446e-12	4.16708e-10
677681	SCARNA20	small Cajal body-specific RNA 20	8.32892	8.25361	8.49057	7.20564	7.24257	7.25073	2.18059	1.12472	2.18059	up	1.56406e-11	1.21259e-09
4646	MYO6	myosin VI	6.72785	6.70438	6.62425	7.34721	7.28419	7.41325	-1.58307	-0.662723	1.58307	down	2.30809e-08	3.89541e-07
85236	HIST1H2BK	histone cluster 1, H2bk	10.0236	9.92513	10.2482	12.3809	12.4	12.4818	-5.11678	-2.35524	5.11678	down	3.49156e-16	8.0731e-13
205717	USF3	upstream transcription factor family member 3	7.1907	7.13007	7.11288	6.45351	6.51541	6.5714	1.54876	0.63111	1.54876	up	4.85251e-08	7.13125e-07
10254	STAM2	signal transducing adaptor molecule 2	6.57449	6.50652	6.57457	7.02396	7.20474	7.22126	-1.51375	-0.598127	1.51375	down	2.99431e-07	3.25131e-06
23011	RAB21	RAB21, member RAS oncogene family	7.14356	7.06286	7.08483	7.98377	8.03338	8.02053	-1.88619	-0.915477	1.88619	down	3.07669e-11	1.99893e-09
27063	ANKRD1	ankyrin repeat domain 1 (cardiac muscle)	5.04696	4.7793	4.75197	5.41291	5.48978	5.76361	-1.62003	-0.696023	1.62003	down	1.16323e-05	7.28073e-05
7110	TMF1	TATA element modulatory factor 1	6.93827	6.86354	6.90834	7.44899	7.5031	7.71598	-1.57204	-0.65264	1.57204	down	1.41052e-07	1.73098e-06
10920	COPS8	COP9 signalosome subunit 8	9.33647	9.28673	9.30554	8.70992	8.69661	8.70593	1.52143	0.605427	1.52143	up	1.19794e-10	5.86392e-09
100130733	LRRC70	leucine rich repeat containing 70	4.0678	3.6991	3.75906	4.54114	4.52992	4.53812	-1.61822	-0.694407	1.61822	down	9.04481e-06	5.86674e-05
56910	STARD7	StAR related lipid transfer domain containing 7	8.5043	8.35757	8.46743	9.12429	9.11995	9.11124	-1.59703	-0.675393	1.59703	down	3.13726e-10	1.24688e-08
64754	SMYD3	SET and MYND domain containing 3	8.71702	8.62643	8.63452	7.80886	7.83238	7.86868	1.76869	0.822683	1.76869	up	3.05824e-11	1.99024e-09
27072	VPS41	VPS41 HOPS complex subunit	8.23243	8.07059	8.15204	8.67777	8.78195	8.75259	-1.50082	-0.58575	1.50082	down	1.02436e-08	1.99828e-07
5438	POLR2I	polymerase (RNA) II (DNA directed) polypeptide I, 14.5kDa	10.5108	10.514	10.4973	9.7354	9.737	9.72959	1.70927	0.77338	1.70927	up	1.85759e-13	5.00112e-11
574040	SNORA6	small nucleolar RNA, H/ACA box 6	8.33077	8.23831	8.46211	7.30481	7.16738	7.43313	2.05902	1.04196	2.05902	up	4.1646e-10	1.55903e-08
5321	PLA2G4A	phospholipase A2 group IVA	5.977	5.95698	6.06572	5.20754	5.31041	5.39312	1.62024	0.69621	1.62024	up	3.30328e-07	3.53697e-06
5906	RAP1A	RAP1A, member of RAS oncogene family	12.788	12.7303	12.7606	14.0742	14.0521	14.0655	-2.46964	-1.3043	2.46964	down	3.45579e-19	1.35837e-14
27020	NPTN	neuroplastin	7.2921	7.19795	7.40241	7.80898	7.9134	7.944	-1.50661	-0.591307	1.50661	down	1.20874e-07	1.51989e-06
8301	PICALM	phosphatidylinositol binding clathrin assembly protein	8.82172	8.67523	8.72387	7.94144	7.88506	7.98183	1.74613	0.804163	1.74613	up	1.22042e-10	5.92341e-09
105372733	LOC105372733	uncharacterized LOC105372733	6.82406	6.92275	6.88964	6.21211	6.13632	6.05766	1.67418	0.743453	1.67418	up	1.9758e-08	3.41676e-07
122769	LRR1	leucine rich repeat protein 1	8.39702	8.41395	8.40718	9.00802	9.04328	9.01311	-1.532	-0.61542	1.532	down	1.80705e-10	8.04495e-09
83640	FAM103A1	family with sequence similarity 103 member A1	6.52854	6.47921	6.50323	7.6704	7.73005	7.71872	-2.30175	-1.20273	2.30175	down	2.03311e-12	2.69076e-10
22856	CHSY1	chondroitin sulfate synthase 1	4.88856	4.77221	4.96191	5.71248	5.32951	5.3822	-1.51625	-0.600503	1.51625	down	3.95029e-05	0.000208814
131118	DNAJC19	DnaJ heat shock protein family (Hsp40) member C19	6.93961	6.6382	6.89394	7.39777	7.43924	7.63184	-1.58634	-0.6657	1.58634	down	9.6609e-07	8.70191e-06
89874	SLC25A21	solute carrier family 25 (mitochondrial oxoadipate carrier), member 21	5.31648	5.21706	5.35418	4.32052	4.48551	4.54828	1.7956	0.84447	1.7956	up	1.46688e-07	1.7912e-06
8445	DYRK2	dual specificity tyrosine-(Y)-phosphorylation regulated kinase 2	6.69285	6.64977	6.74181	7.5028	7.57443	7.53674	-1.794	-0.84318	1.794	down	3.80804e-10	1.45182e-08
2760	GM2A	GM2 ganglioside activator	6.45028	6.17406	6.32746	5.62144	5.64686	5.62144	1.61033	0.687353	1.61033	up	4.59402e-07	4.67453e-06
80263	TRIM45	tripartite motif containing 45	4.98066	5.27005	5.27583	5.74413	5.72687	5.81292	-1.50086	-0.585793	1.50086	down	1.27272e-05	7.87079e-05
4734	NEDD4	neural precursor cell expressed, developmentally down-regulated 4, E3 ubiquitin protein ligase	8.46121	8.5716	8.5625	7.70954	7.70971	7.81332	1.72618	0.78758	1.72618	up	2.07464e-10	9.05081e-09
3281	HSBP1	heat shock factor binding protein 1	8.68616	8.5202	8.68649	9.19486	9.36049	9.34741	-1.59104	-0.66997	1.59104	down	5.30285e-09	1.16577e-07
10961	ERP29	endoplasmic reticulum protein 29	8.55856	8.46626	8.56701	10.2015	10.2114	10.3027	-3.26688	-1.70791	3.26688	down	2.65647e-16	7.45842e-13
92344	GORAB	golgin, RAB6-interacting	7.03155	7.18677	7.04897	7.68372	7.73631	7.65373	-1.51798	-0.602157	1.51798	down	4.81364e-08	7.08917e-07
23161	SNX13	sorting nexin 13	6.92157	6.84145	6.71618	7.45434	7.58178	7.66328	-1.67025	-0.740067	1.67025	down	3.19666e-08	5.07886e-07
375190	FAM228B	family with sequence similarity 228 member B	4.89349	4.71387	4.92948	4.36231	4.01233	4.35953	1.51665	0.60089	1.51665	up	6.32442e-05	0.000314995
374986	FAM73A	family with sequence similarity 73 member A	5.91694	5.92488	5.92392	6.88593	6.85773	7.23444	-2.10058	-1.07079	2.10058	down	6.51924e-09	1.38319e-07
91750	LIN52	lin-52 DREAM MuvB core complex component	6.32872	6.14126	6.35094	7.14387	7.14078	6.84629	-1.70528	-0.770007	1.70528	down	3.03293e-07	3.28689e-06
27067	STAU2	staufen double-stranded RNA binding protein 2	5.5128	5.44428	5.69715	3.98197	4.19432	4.32046	2.61322	1.38583	2.61322	up	1.46012e-09	4.17463e-08
132789	GNPDA2	glucosamine-6-phosphate deaminase 2	6.74382	6.74935	6.82	7.30912	7.43101	7.46133	-1.54695	-0.62943	1.54695	down	4.65383e-08	6.9091e-07
63915	BLOC1S5	biogenesis of lysosomal organelles complex-1, subunit 5, muted	6.27029	6.21243	6.13448	6.80096	6.93961	6.93281	-1.60814	-0.685393	1.60814	down	6.90811e-08	9.56453e-07
8876	VNN1	vanin 1	5.8889	5.96495	5.81385	6.8224	6.97521	6.881	-2.00505	-1.00364	2.00505	down	7.18147e-10	2.38213e-08
9156	EXO1	exonuclease 1	7.50854	7.49887	7.59844	8.14425	8.06811	8.26759	-1.54189	-0.6247	1.54189	down	2.64945e-08	4.36653e-07
7486	WRN	Werner syndrome, RecQ helicase-like	6.84047	6.97381	6.79152	7.41781	7.45592	7.63139	-1.5509	-0.633107	1.5509	down	2.35568e-07	2.66649e-06
2355	FOSL2	FOS-like antigen 2	6.29763	6.19355	6.11181	7.0217	7.13105	7.33588	-1.94785	-0.96188	1.94785	down	8.55097e-09	1.71399e-07
55246	CCDC25	coiled-coil domain containing 25	6.86325	6.66873	6.70702	7.47111	7.51388	7.59634	-1.71806	-0.780777	1.71806	down	6.79128e-09	1.42523e-07
55257	MRGBP	MRG/MORF4L binding protein	8.8955	8.79368	8.87274	9.57854	9.57055	9.62172	-1.66589	-0.736297	1.66589	down	1.79363e-11	1.3429e-09
84514	GHDC	GH3 domain containing	5.47052	6.15824	5.75007	6.56846	6.34138	6.45811	-1.58342	-0.66304	1.58342	down	0.000136814	0.000619913
115265	DDIT4L	DNA damage inducible transcript 4 like	6.12224	6.03688	6.08466	5.58842	5.49612	5.39122	1.50456	0.58934	1.50456	up	1.90348e-06	1.54491e-05
51131	PHF11	PHD finger protein 11	4.81921	4.6918	4.37708	5.51337	5.57473	5.52328	-1.87613	-0.907763	1.87613	down	4.00798e-07	4.16183e-06
51639	SF3B6	splicing factor 3b subunit 6	11.2647	11.1838	11.3263	10.4707	10.5507	10.4827	1.68984	0.756883	1.68984	up	4.08186e-12	4.61051e-10
122970	ACOT4	acyl-CoA thioesterase 4	6.32384	6.23367	6.41362	6.90579	6.85663	7.01975	-1.51959	-0.60368	1.51959	down	4.88272e-07	4.91863e-06
23204	ARL6IP1	ADP ribosylation factor like GTPase 6 interacting protein 1	9.60903	9.46775	9.5468	10.1806	10.1429	10.1473	-1.53237	-0.615763	1.53237	down	1.45959e-10	6.74965e-09
7837	PXDN	peroxidasin	5.81111	5.89295	5.80833	5.06248	5.1802	5.07299	1.66122	0.73224	1.66122	up	1.39952e-07	1.71963e-06
4773	NFATC2	nuclear factor of activated T-cells, cytoplasmic, calcineurin-dependent 2	6.46213	6.4557	6.53223	7.42257	7.28044	7.47466	-1.87801	-0.909203	1.87801	down	8.90543e-10	2.81161e-08
677798	SNORA9	small nucleolar RNA, H/ACA box 9	6.0345	6.05239	6.24721	4.91209	5.05438	4.94712	2.20407	1.14017	2.20407	up	1.32239e-09	3.86176e-08
7504	XK	X-linked Kx blood group	4.84743	4.80839	4.76488	5.89704	5.94314	6.04996	-2.22913	-1.15648	2.22913	down	4.65439e-10	1.69085e-08
1836	SLC26A2	solute carrier family 26 (anion exchanger), member 2	8.74279	8.64414	8.68539	7.79924	7.80898	7.84597	1.8311	0.87271	1.8311	up	1.19208e-11	9.99082e-10
58497	PRUNE	prune exopolyphosphatase	7.70388	7.63953	7.70226	8.41345	8.36927	8.42462	-1.64782	-0.720557	1.64782	down	2.16165e-10	9.36801e-09
51534	VTA1	vesicle (multivesicular body) trafficking 1	7.9125	7.67062	7.81686	8.39004	8.39981	8.4366	-1.52501	-0.608823	1.52501	down	3.69517e-08	5.7161e-07
5795	PTPRJ	protein tyrosine phosphatase, receptor type, J	7.74574	7.76912	7.70121	8.39272	8.5709	8.56012	-1.70435	-0.769223	1.70435	down	7.10764e-10	2.36348e-08
116254	GINM1	glycoprotein integral membrane 1	8.36633	8.31089	8.34709	7.73604	7.65778	7.67185	1.5723	0.65288	1.5723	up	9.66388e-10	3.00283e-08
5597	MAPK6	mitogen-activated protein kinase 6	6.56267	6.37653	6.3401	6.99883	7.04003	7.03426	-1.51355	-0.59794	1.51355	down	4.40282e-07	4.52212e-06
51125	GOLGA7	golgin A7	6.92681	6.8307	6.98745	8.52506	8.37836	8.53967	-2.96092	-1.56604	2.96092	down	1.51413e-13	4.42719e-11
440193	CCDC88C	coiled-coil domain containing 88C	6.5902	6.55389	6.54096	5.7535	5.87611	5.71341	1.71794	0.780677	1.71794	up	1.96039e-08	3.39608e-07
91663	MYADM	myeloid-associated differentiation marker	10.7718	10.8383	10.7935	10.1235	10.066	10.1167	1.62357	0.699167	1.62357	up	1.5495e-12	2.22706e-10
280	AMY2B	amylase, alpha 2B (pancreatic)	5.35526	5.34506	5.33899	3.75544	4.40974	4.33303	2.26634	1.18037	2.26634	up	3.96963e-07	4.13008e-06
9134	CCNE2	cyclin E2	7.3999	7.36569	7.33793	8.26438	8.19429	8.21106	-1.80926	-0.855403	1.80926	down	4.01569e-11	2.45101e-09
9262	STK17B	serine/threonine kinase 17b	4.82313	4.56644	4.80457	5.61522	5.44367	5.83636	-1.86654	-0.90037	1.86654	down	5.66858e-07	5.55787e-06
64172	OSGEPL1	O-sialoglycoprotein endopeptidase-like 1	6.776	6.69674	6.7115	7.37064	7.38589	7.50634	-1.6165	-0.692877	1.6165	down	1.17213e-08	2.22039e-07
2308	FOXO1	forkhead box O1	7.53113	7.36037	7.48663	8.32143	8.2493	8.43126	-1.83353	-0.87462	1.83353	down	4.93401e-10	1.76954e-08
55245	UQCC1	ubiquinol-cytochrome c reductase complex assembly factor 1	7.90207	7.83974	8.05032	7.02332	7.15854	7.13806	1.77039	0.82407	1.77039	up	2.35163e-09	6.07999e-08
148206	ZNF714	zinc finger protein 714	4.28008	4.03743	4.12676	4.69301	4.87304	4.67146	-1.51335	-0.597747	1.51335	down	2.10029e-05	0.000121104
81839	VANGL1	VANGL planar cell polarity protein 1	7.28644	7.21093	7.13299	8.371	8.35289	8.43284	-2.25864	-1.17546	2.25864	down	1.8185e-12	2.51689e-10
57102	C12orf4	chromosome 12 open reading frame 4	8.01192	7.96108	7.87424	8.46359	8.53051	8.64869	-1.51416	-0.598517	1.51416	down	2.63798e-08	4.35448e-07
54790	TET2	tet methylcytosine dioxygenase 2	6.9843	6.91495	6.87751	7.56373	7.58139	7.60556	-1.57786	-0.657973	1.57786	down	7.27543e-09	1.50197e-07
339665	SLC35E4	solute carrier family 35 member E4	7.33634	7.39502	7.24131	6.79646	6.58879	6.67968	1.55392	0.635913	1.55392	up	1.61562e-07	1.94682e-06
7072	TIA1	TIA1 cytotoxic granule-associated RNA binding protein	6.81823	6.55246	6.71818	7.45047	7.559	7.48559	-1.74359	-0.802063	1.74359	down	1.21221e-08	2.27656e-07
57534	MIB1	mindbomb E3 ubiquitin protein ligase 1	9.24788	9.14088	9.23238	9.86536	9.89342	9.83645	-1.57793	-0.65803	1.57793	down	5.78771e-11	3.28279e-09
157378	TMEM65	transmembrane protein 65	6.25272	6.26056	6.22725	4.88998	5.16041	5.12078	2.28119	1.18979	2.28119	up	7.71459e-10	2.52068e-08
339166	LOC339166	uncharacterized LOC339166	9.12101	9.11276	9.03957	8.11205	8.24358	8.24591	1.85395	0.8906	1.85395	up	1.66214e-11	1.26615e-09
2495	FTH1	ferritin, heavy polypeptide 1	9.41619	9.34361	9.21106	9.92469	9.88244	10.1336	-1.5764	-0.656633	1.5764	down	2.92055e-08	4.72419e-07
5095	PCCA	propionyl-CoA carboxylase alpha subunit	8.10205	8.04933	8.22662	7.21655	7.44648	7.43693	1.69272	0.759347	1.69272	up	1.58212e-08	2.85792e-07
9761	MLEC	malectin	10.36	10.2997	10.3013	9.55372	9.6183	9.67303	1.63049	0.705303	1.63049	up	1.36563e-11	1.10906e-09
221937	FOXK1	forkhead box K1	8.67756	8.67704	8.7391	7.92724	7.97393	7.99594	1.66117	0.732197	1.66117	up	9.30119e-11	4.82325e-09
92181	UBTD2	ubiquitin domain containing 2	8.53051	8.38283	8.4542	7.62142	7.68381	7.79496	1.68855	0.755783	1.68855	up	1.47378e-09	4.19782e-08
23198	PSME4	proteasome activator subunit 4	5.16565	4.85453	4.90927	5.50731	5.57374	6.02512	-1.65356	-0.725573	1.65356	down	3.88915e-05	0.000205887
84224	NBPF3	neuroblastoma breakpoint family member 3	6.31731	6.10658	6.3616	6.83872	7.00671	6.95868	-1.59424	-0.672873	1.59424	down	4.24157e-07	4.36791e-06
25793	FBXO7	F-box protein 7	9.13401	9.07303	9.13454	9.76412	9.7787	9.85344	-1.60758	-0.684893	1.60758	down	2.97526e-11	1.94267e-09
153339	TMEM167A	transmembrane protein 167A	9.21686	9.18509	9.11635	9.91152	9.875	9.92598	-1.66025	-0.7314	1.66025	down	9.25709e-12	8.19524e-10
26149	ZNF658	zinc finger protein 658	6.01253	5.91455	5.97232	5.01374	5.2117	5.34082	1.71441	0.777713	1.71441	up	3.92429e-07	4.08615e-06
147841	SPC24	SPC24, NDC80 kinetochore complex component	6.33292	5.95191	6.18547	7.14908	7.28466	7.21691	-2.0851	-1.06012	2.0851	down	4.52205e-09	1.03042e-07
55195	C14orf105	chromosome 14 open reading frame 105	6.33376	6.33095	6.35931	5.68041	5.52854	5.60576	1.66606	0.736437	1.66606	up	4.99356e-08	7.29944e-07
1756	DMD	dystrophin	8.17773	8.28734	8.17809	8.95909	8.95178	9.04339	-1.7057	-0.770367	1.7057	down	9.17422e-11	4.78264e-09
55761	TTC17	tetratricopeptide repeat domain 17	7.07517	7.08195	7.07308	7.77096	7.81302	7.86411	-1.66936	-0.739297	1.66936	down	7.24323e-10	2.39878e-08
9581	PREPL	prolyl endopeptidase-like	6.46629	6.45811	6.56679	5.85525	5.85579	5.92901	1.53373	0.617047	1.53373	up	2.78407e-07	3.0645e-06
3014	H2AFX	H2A histone family member X	11.5559	11.5013	11.5799	12.189	12.1748	12.1832	-1.55466	-0.636597	1.55466	down	3.15668e-13	6.98264e-11
64359	NXN	nucleoredoxin	9.78868	9.72226	9.74551	10.537	10.5226	10.6037	-1.74384	-0.80227	1.74384	down	6.68629e-13	1.17856e-10
116028	RMI2	RecQ mediated genome instability 2	7.71873	7.69141	7.54806	8.39442	8.50043	8.55736	-1.77933	-0.831337	1.77933	down	6.19147e-10	2.12921e-08
8824	CES2	carboxylesterase 2	5.54201	5.37574	5.50058	6.07439	6.12219	6.22197	-1.58748	-0.66674	1.58748	down	4.90237e-07	4.93211e-06
26263	FBXO22	F-box protein 22	7.91808	7.84603	7.91024	8.49487	8.46545	8.67551	-1.57334	-0.653827	1.57334	down	1.03724e-08	2.01736e-07
26092	TOR1AIP1	torsin A interacting protein 1	6.99676	6.76922	7.05272	7.58598	7.52569	7.73109	-1.59625	-0.674687	1.59625	down	3.39407e-07	3.62234e-06
677808	SNORA23	small nucleolar RNA, H/ACA box 23	4.98327	4.78475	4.92791	4.34341	4.15213	4.43158	1.50483	0.589603	1.50483	up	2.5967e-05	0.000145128
220213	OTUD1	OTU deubiquitinase 1	5.57316	5.80957	5.69691	6.52376	6.32806	6.55349	-1.71145	-0.775223	1.71145	down	2.0312e-07	2.36354e-06
10569	SLU7	SLU7 homolog, splicing factor	9.01106	8.83922	9.05328	8.2163	8.27631	8.19662	1.66799	0.73811	1.66799	up	1.21296e-09	3.62019e-08
55915	LANCL2	LanC lantibiotic synthetase component C-like 2 (bacterial)	4.6933	4.87718	5.01045	5.44162	5.74839	5.83396	-1.7585	-0.814347	1.7585	down	2.63994e-06	2.05315e-05
1915	EEF1A1	eukaryotic translation elongation factor 1 alpha 1	5.90176	5.9337	6.17854	6.55328	6.73143	6.62359	-1.5491	-0.631433	1.5491	down	2.04837e-06	1.6435e-05
5899	RALB	v-ral simian leukemia viral oncogene homolog B	9.61862	9.51196	9.58056	8.70947	8.71943	8.76073	1.79067	0.840503	1.79067	up	3.36778e-12	3.99931e-10
3638	INSIG1	insulin induced gene 1	7.88801	7.9026	8.16955	8.53758	8.67538	8.72069	-1.57771	-0.65783	1.57771	down	1.6405e-07	1.97256e-06
54149	C21orf91	chromosome 21 open reading frame 91	8.11541	7.95343	7.96157	8.71289	8.83193	8.81043	-1.71113	-0.774947	1.71113	down	5.24114e-10	1.85264e-08
7473	WNT3	wingless-type MMTV integration site family member 3	6.58122	6.38147	6.47443	6.99954	6.98916	7.22502	-1.50754	-0.5922	1.50754	down	1.78124e-06	1.4617e-05
56648	EIF5A2	eukaryotic translation initiation factor 5A2	4.73119	4.7041	4.6426	3.81818	4.00639	4.25321	1.58744	0.666703	1.58744	up	2.02239e-05	0.000117213
56160	NSMCE3	NSE3 homolog, SMC5-SMC6 complex component	8.82689	8.68855	8.72547	7.64024	7.66579	7.58218	2.16981	1.11757	2.16981	up	1.34713e-12	1.99818e-10
10444	ZER1	zyg-11 related, cell cycle regulator	7.30581	7.28031	7.27324	6.34406	6.25272	6.31962	1.97381	0.980987	1.97381	up	9.61894e-11	4.96183e-09
114932	MRFAP1L1	Morf4 family associated protein 1-like 1	8.92977	8.89672	8.99908	7.38971	7.45482	7.35244	2.91373	1.54287	2.91373	up	9.74588e-15	7.02656e-12
19	ABCA1	ATP binding cassette subfamily A member 1	5.69395	5.67155	5.69642	6.57767	6.48301	6.60458	-1.82485	-0.86778	1.82485	down	3.47647e-09	8.34247e-08
6038	RNASE4	ribonuclease, RNase A family, 4	5.18568	4.95959	5.0706	6.60341	6.57995	6.59396	-2.86887	-1.52048	2.86887	down	8.48698e-12	7.70434e-10
6884	TAF13	TATA-box binding protein associated factor 13	5.34435	5.18558	5.41047	4.34643	4.54525	4.22465	1.92033	0.941357	1.92033	up	1.49995e-07	1.82252e-06
374378	GALNT18	polypeptide N-acetylgalactosaminyltransferase 18	6.25243	5.99064	6.21351	5.30694	5.53075	5.51583	1.62565	0.70102	1.62565	up	1.5999e-06	1.33547e-05
2921	CXCL3	chemokine (C-X-C motif) ligand 3	6.91557	6.94973	6.88513	7.73573	7.37364	7.80233	-1.64767	-0.720423	1.64767	down	8.58302e-07	7.88992e-06
394	ARHGAP5	Rho GTPase activating protein 5	7.33344	7.21943	7.28526	8.01914	8.01171	7.98692	-1.65467	-0.726547	1.65467	down	7.57709e-10	2.48816e-08
2152	F3	coagulation factor III (thromboplastin, tissue factor)	8.86242	8.83051	8.87123	8.10557	7.98538	8.15656	1.70789	0.772217	1.70789	up	1.77482e-10	7.95472e-09
677825	SNORA44	small nucleolar RNA, H/ACA box 44	6.33838	6.07404	6.49716	5.44946	5.31236	5.59299	1.80449	0.85159	1.80449	up	8.45713e-07	7.79425e-06
9734	HDAC9	histone deacetylase 9	4.98671	4.68644	5.00651	3.82305	4.29819	4.10209	1.76391	0.818777	1.76391	up	9.14022e-06	5.91691e-05
157	ADRBK2	adrenergic, beta, receptor kinase 2	6.6035	6.20096	6.5799	7.13375	7.17231	7.20333	-1.63393	-0.708343	1.63393	down	1.41499e-06	1.20362e-05
9839	ZEB2	zinc finger E-box binding homeobox 2	4.58606	4.41761	4.30494	5.00424	5.19087	5.1049	-1.58425	-0.6638	1.58425	down	5.50432e-06	3.8341e-05
23576	DDAH1	dimethylarginine dimethylaminohydrolase 1	8.14649	8.02008	7.97743	9.87176	9.84267	9.89967	-3.53906	-1.82337	3.53906	down	4.7999e-16	8.78177e-13
23180	RFTN1	raftlin, lipid raft linker 1	8.40392	8.45996	8.31853	7.73474	7.75911	7.70974	1.57965	0.659607	1.57965	up	1.74766e-09	4.80052e-08
23362	PSD3	pleckstrin and Sec7 domain containing 3	8.49287	8.46585	8.5509	7.59815	7.89129	7.80429	1.66859	0.73863	1.66859	up	1.26868e-08	2.37354e-07
3489	IGFBP6	insulin like growth factor binding protein 6	8.95011	8.7642	8.91381	9.50643	9.45059	9.58535	-1.55626	-0.638083	1.55626	down	3.66013e-09	8.68772e-08
4803	NGF	nerve growth factor (beta polypeptide)	6.94141	6.99994	7.00152	8.01151	7.91938	8.14595	-2.06288	-1.04466	2.06288	down	6.13073e-11	3.4574e-09
2014	EMP3	epithelial membrane protein 3	9.48269	9.47726	9.57803	10.3864	10.3174	10.433	-1.82294	-0.866267	1.82294	down	1.8285e-12	2.52185e-10
9364	RAB28	RAB28, member RAS oncogene family	6.90233	6.87555	6.92328	7.42132	7.55927	7.5757	-1.53515	-0.618377	1.53515	down	4.08091e-08	6.22461e-07
85465	EPT1	ethanolaminephosphotransferase 1	5.94263	5.7838	5.84733	6.42211	6.39498	6.53137	-1.50688	-0.591567	1.50688	down	9.89926e-07	8.87974e-06
54887	UHRF1BP1	UHRF1 binding protein 1	7.91441	7.82653	7.80265	9.01198	9.05445	8.94918	-2.23046	-1.15734	2.23046	down	4.13931e-13	8.30122e-11
4139	MARK1	MAP/microtubule affinity-regulating kinase 1	4.58529	4.59503	4.56227	5.47847	5.46681	5.38611	-1.81873	-0.862933	1.81873	down	2.44703e-08	4.08951e-07
493869	GPX8	glutathione peroxidase 8 (putative)	6.23109	6.279	6.29338	7.1876	7.17036	7.21975	-1.89835	-0.924747	1.89835	down	2.21224e-10	9.54516e-09
8318	CDC45	cell division cycle 45	7.79129	7.74905	7.68917	8.3448	8.38323	8.35535	-1.5347	-0.617957	1.5347	down	2.11796e-09	5.60233e-08
57494	RIMKLB	ribosomal modification protein rimK-like family member B	6.27512	6.04053	6.1614	7.15513	7.18179	7.08528	-1.97481	-0.981717	1.97481	down	1.02305e-09	3.13919e-08
7337	UBE3A	ubiquitin protein ligase E3A	10.076	9.94052	9.99117	9.37722	9.43237	9.40283	1.51407	0.598433	1.51407	up	2.736e-10	1.12376e-08
55785	FGD6	FYVE, RhoGEF and PH domain containing 6	6.43822	6.20176	6.25552	7.16041	7.19421	7.29686	-1.89036	-0.91866	1.89036	down	3.36391e-09	8.12193e-08
993	CDC25A	cell division cycle 25A	6.56156	6.51061	6.56252	7.08761	7.28329	7.36819	-1.62616	-0.701467	1.62616	down	1.00258e-07	1.30407e-06
26151	NAT9	N-acetyltransferase 9 (GCN5-related, putative)	9.07727	8.9949	9.08644	8.2804	8.36332	8.40917	1.62665	0.701907	1.62665	up	2.86943e-10	1.16638e-08
360023	ZBTB41	zinc finger and BTB domain containing 41	5.79371	5.84704	5.8126	6.767	6.84978	6.86945	-2.01525	-1.01096	2.01525	down	2.57826e-10	1.0747e-08
55754	TMEM30A	transmembrane protein 30A	7.74738	7.73301	7.85955	8.46271	8.46796	8.34785	-1.56503	-0.646193	1.56503	down	5.13222e-09	1.13652e-07
9727	RAB11FIP3	RAB11 family interacting protein 3 (class II)	7.32667	7.38577	7.44757	6.76286	6.837	6.77141	1.51178	0.596247	1.51178	up	5.59334e-08	8.01522e-07
8894	EIF2S2	eukaryotic translation initiation factor 2 subunit beta	7.36776	7.46833	7.2879	8.651	8.6167	8.59651	-2.37305	-1.24674	2.37305	down	7.0062e-13	1.22209e-10
11116	FGFR1OP	FGFR1 oncogene partner	6.65344	6.69542	6.96631	5.94545	6.00194	5.96826	1.74091	0.79984	1.74091	up	9.5992e-08	1.25849e-06
8760	CDS2	CDP-diacylglycerol synthase 2	9.07782	8.98051	9.0778	8.04983	8.05065	8.12676	1.95834	0.96963	1.95834	up	2.62294e-12	3.27825e-10
7991	TUSC3	tumor suppressor candidate 3	8.44799	8.42971	8.44799	9.2332	9.33572	9.44663	-1.8617	-0.89662	1.8617	down	2.71873e-11	1.82676e-09
1635	DCTD	dCMP deaminase	9.44232	9.42116	9.43924	9.99294	10.0176	10.0644	-1.50603	-0.590747	1.50603	down	4.61653e-11	2.72875e-09
145407	C14orf37	chromosome 14 open reading frame 37	7.08883	6.90508	7.0716	6.39673	6.24928	6.52215	1.5502	0.63245	1.5502	up	1.00487e-06	8.99536e-06
8731	RNMT	RNA (guanine-7-) methyltransferase	7.01592	6.95919	7.04847	7.71107	7.67448	7.78547	-1.64241	-0.715813	1.64241	down	2.64048e-09	6.70907e-08
84301	DDI2	DNA damage inducible 1 homolog 2	5.97176	5.74127	5.82531	6.4999	6.39725	6.57983	-1.56505	-0.646213	1.56505	down	9.07851e-07	8.26891e-06
161742	SPRED1	sprouty-related, EVH1 domain containing 1	6.31338	6.3009	6.31135	6.98576	6.94232	6.92385	-1.5606	-0.6421	1.5606	down	3.27238e-08	5.17408e-07
9354	UBE4A	ubiquitination factor E4A	6.68124	6.56608	6.60592	7.59379	7.6141	7.69552	-2.02332	-1.01672	2.02332	down	5.03352e-11	2.92249e-09
51626	DYNC2LI1	dynein, cytoplasmic 2, light intermediate chain 1	4.59907	4.43769	4.44574	5.27005	5.50763	5.51498	-1.91417	-0.93672	1.91417	down	6.72675e-08	9.3629e-07
285855	RPL7L1	ribosomal protein L7 like 1	8.65534	8.50465	8.47555	9.41901	9.33741	9.42357	-1.80019	-0.84815	1.80019	down	5.42421e-11	3.11255e-09
10287	RGS19	regulator of G-protein signaling 19	9.30901	9.29597	9.32849	8.2934	8.34915	8.38676	1.9562	0.968053	1.9562	up	5.88028e-13	1.07505e-10
79971	WLS	wntless Wnt ligand secretion mediator	7.73067	7.63137	7.73338	6.89508	6.76791	6.87333	1.80629	0.853033	1.80629	up	5.32334e-10	1.87495e-08
2034	EPAS1	endothelial PAS domain protein 1	9.32961	9.21525	9.14843	9.80778	9.78167	10.0745	-1.57668	-0.656893	1.57668	down	7.20496e-08	9.89882e-07
6715	SRD5A1	steroid-5-alpha-reductase, alpha polypeptide 1 (3-oxo-5 alpha-steroid delta 4-dehydrogenase alpha 1)	8.19669	8.18737	8.09917	7.38022	7.54651	7.41527	1.64005	0.713743	1.64005	up	3.08501e-09	7.63137e-08
55904	KMT2E	lysine (K)-specific methyltransferase 2E	6.84022	6.62818	6.39443	7.32765	7.29514	7.50863	-1.68903	-0.756197	1.68903	down	1.10017e-06	9.73531e-06
10643	IGF2BP3	insulin like growth factor 2 mRNA binding protein 3	8.58687	8.56329	8.5513	9.33762	9.39313	9.39151	-1.74949	-0.806933	1.74949	down	3.30681e-12	3.95078e-10
126321	MFSD12	major facilitator superfamily domain containing 12	8.13038	7.95025	8.06071	7.24565	7.28159	7.48028	1.63725	0.711273	1.63725	up	3.47705e-08	5.42781e-07
84881	RPUSD4	RNA pseudouridylate synthase domain containing 4	8.50189	8.3051	8.52007	6.6623	6.59374	6.72282	3.44077	1.78273	3.44077	up	6.5082e-14	2.32562e-11
55359	STYK1	serine/threonine/tyrosine kinase 1	4.31792	4.38502	4.60599	4.96093	5.05054	5.0891	-1.51279	-0.597213	1.51279	down	1.65285e-05	9.83328e-05
41	ASIC1	acid sensing ion channel 1	7.72683	7.85229	7.84133	7.07858	7.11035	6.95132	1.69357	0.760067	1.69357	up	3.57071e-09	8.52179e-08
57150	SMIM8	small integral membrane protein 8	5.8279	5.88253	5.97119	6.76269	6.71533	6.7546	-1.80292	-0.850333	1.80292	down	3.61523e-09	8.6083e-08
51018	RRP15	ribosomal RNA processing 15 homolog	7.2699	7.12501	6.92808	6.43692	6.4259	6.46611	1.58522	0.664687	1.58522	up	5.45384e-07	5.38493e-06
580	BARD1	BRCA1 associated RING domain 1	7.80158	7.84603	7.84493	8.50899	8.49684	8.53905	-1.60671	-0.684113	1.60671	down	2.2338e-10	9.61707e-09
205327	C2orf69	chromosome 2 open reading frame 69	9.57988	9.51087	9.51645	10.3305	10.3107	10.4218	-1.76367	-0.818583	1.76367	down	1.98715e-12	2.65676e-10
4189	DNAJB9	DnaJ heat shock protein family (Hsp40) member B9	7.24424	7.1024	7.22214	8.03022	7.97541	8.24675	-1.85901	-0.894533	1.85901	down	2.4884e-09	6.39291e-08
10363	HMG20A	high mobility group 20A	7.36616	7.28793	7.34638	6.69828	6.79799	6.59838	1.55323	0.635273	1.55323	up	7.92913e-08	1.07288e-06
57179	KIAA1191	KIAA1191	10.6548	10.6106	10.6858	9.8969	9.88167	9.94275	1.67398	0.743283	1.67398	up	1.10619e-12	1.73232e-10
200728	TMEM17	transmembrane protein 17	6.18974	6.20577	6.07153	6.76391	6.70042	6.85277	-1.53335	-0.616687	1.53335	down	3.2362e-07	3.47555e-06
144501	KRT80	keratin 80, type II	7.78147	7.67891	7.86317	8.47949	8.46599	8.41182	-1.59983	-0.677917	1.59983	down	2.91572e-09	7.29988e-08
647121	EMBP1	embigin pseudogene 1	8.62075	8.42994	8.4907	9.20956	9.21488	9.2604	-1.6409	-0.714483	1.6409	down	4.51924e-10	1.65591e-08
7057	THBS1	thrombospondin 1	7.93348	7.81202	7.69968	8.89516	8.68272	8.91465	-2.022	-1.01578	2.022	down	3.30421e-10	1.30603e-08
220988	HNRNPA3	heterogeneous nuclear ribonucleoprotein A3	7.77372	7.69292	7.86575	8.34158	8.45799	8.29981	-1.5042	-0.588997	1.5042	down	4.73323e-08	7.00222e-07
79365	BHLHE41	basic helix-loop-helix family member e41	6.96351	6.94019	6.84563	7.6185	7.61779	7.91015	-1.73994	-0.799037	1.73994	down	3.34859e-08	5.27208e-07
6146	RPL22	ribosomal protein L22	10.6534	10.6331	10.5322	11.6827	11.7485	11.7383	-2.16889	-1.11696	2.16889	down	5.40606e-15	5.43025e-12
4735	SEPT2	septin 2	9.73322	9.62984	9.73883	8.48178	8.55124	8.46636	2.29873	1.20084	2.29873	up	5.63635e-14	2.09008e-11
79882	ZC3H14	zinc finger CCCH-type containing 14	7.38795	7.24547	7.35188	7.91233	7.96782	7.9658	-1.53711	-0.620217	1.53711	down	1.19797e-08	2.25737e-07
124540	MSI2	musashi RNA binding protein 2	6.21437	6.1219	6.37058	5.19332	5.17011	5.19332	2.07058	1.05003	2.07058	up	2.23025e-09	5.8443e-08
23262	PPIP5K2	diphosphoinositol pentakisphosphate kinase 2	7.35469	7.33405	7.21062	6.62002	6.60086	6.66813	1.5912	0.670117	1.5912	up	2.30685e-08	3.89499e-07
283209	PGM2L1	phosphoglucomutase 2-like 1	5.76695	5.91577	5.91577	7.89534	7.95723	8.06049	-4.30155	-2.10486	4.30155	down	1.14345e-14	7.3361e-12
7414	VCL	vinculin	11.2899	11.3072	11.3104	11.9062	11.8756	11.8991	-1.50646	-0.591167	1.50646	down	3.72676e-13	7.70988e-11
54541	DDIT4	DNA damage inducible transcript 4	9.74139	9.56385	9.582	10.8865	10.8409	10.964	-2.40833	-1.26803	2.40833	down	6.89962e-14	2.37898e-11
3093	UBE2K	ubiquitin conjugating enzyme E2K	8.11446	8.08236	8.10432	9.18593	9.13695	9.23804	-2.12372	-1.08659	2.12372	down	2.03242e-13	5.18346e-11
9827	RGP1	RGP1 homolog, RAB6A GEF complex partner 1	9.72451	9.67737	9.70088	8.95412	9.03071	8.87422	1.67935	0.747903	1.67935	up	3.85366e-11	2.37423e-09
51141	INSIG2	insulin induced gene 2	7.44484	7.25495	7.34733	6.34293	6.43155	6.49894	1.89811	0.924567	1.89811	up	1.24831e-09	3.70599e-08
57515	SERINC1	serine incorporator 1	11.0306	10.9961	11.0214	10.1281	10.1499	10.1856	1.81694	0.861513	1.81694	up	3.15578e-14	1.30573e-11
692086	SNORD17	small nucleolar RNA, C/D box 17	8.22653	8.01369	8.08435	7.28157	7.25824	7.21515	1.81069	0.856537	1.81069	up	5.24868e-10	1.85364e-08
26751	SH3YL1	SH3 and SYLF domain containing 1	7.44713	7.44536	7.4992	6.68303	6.78059	6.91057	1.59383	0.6725	1.59383	up	4.33277e-08	6.53509e-07
79648	MCPH1	microcephalin 1	5.72054	5.48972	5.53665	6.24098	6.20939	6.46117	-1.64895	-0.721543	1.64895	down	8.3947e-07	7.75307e-06
51329	ARL6IP4	ADP ribosylation factor like GTPase 6 interacting protein 4	8.50542	8.5047	8.5453	7.78771	7.83238	7.76251	1.65207	0.724273	1.65207	up	1.33008e-10	6.32526e-09
10795	ZNF268	zinc finger protein 268	7.35728	7.40161	7.24703	7.98217	7.96411	7.91374	-1.53478	-0.618033	1.53478	down	1.55719e-08	2.81677e-07
79723	SUV39H2	suppressor of variegation 3-9 homolog 2	5.24672	5.12726	5.15338	5.7371	5.82199	5.84732	-1.54365	-0.62635	1.54365	down	9.86653e-07	8.85608e-06
116496	FAM129A	family with sequence similarity 129 member A	6.31676	6.12218	6.4562	7.04533	6.94858	7.08998	-1.65816	-0.729583	1.65816	down	2.78327e-07	3.06448e-06
8462	KLF11	Kruppel-like factor 11	6.61106	6.47006	6.49015	7.28938	7.33424	7.52633	-1.81448	-0.85956	1.81448	down	6.68844e-09	1.4074e-07
55733	HHAT	hedgehog acyltransferase	4.51369	4.54309	4.74507	5.51748	5.43185	5.7145	-1.93723	-0.953993	1.93723	down	8.66485e-08	1.15337e-06
51773	RSF1	remodeling and spacing factor 1	9.00353	8.89972	9.021	9.51425	9.52831	9.64343	-1.50238	-0.587247	1.50238	down	2.65088e-09	6.72246e-08
115701	ALPK2	alpha kinase 2	7.15986	7.16191	7.297	6.43497	6.27004	6.36659	1.80132	0.849057	1.80132	up	3.60478e-09	8.59789e-08
677813	SNORA30	small nucleolar RNA, H/ACA box 30	5.93149	6.07394	6.1783	5.41767	5.49843	5.21841	1.60556	0.683073	1.60556	up	2.45718e-06	1.92361e-05
79101	TAF1D	TATA-box binding protein associated factor, RNA polymerase I, D	7.69292	7.55888	7.69988	7.04404	7.06701	7.04731	1.51338	0.597773	1.51338	up	3.65351e-08	5.66951e-07
5537	PPP6C	protein phosphatase 6, catalytic subunit	7.42702	7.29841	7.31035	8.00707	7.96877	8.15858	-1.62399	-0.699547	1.62399	down	1.11385e-08	2.13364e-07
9218	VAPA	VAMP associated protein A	8.20469	8.13491	8.28538	8.75127	8.83527	8.8194	-1.50906	-0.593653	1.50906	down	4.94368e-09	1.10035e-07
283551	LINC01588	long intergenic non-protein coding RNA 1588	5.93138	5.79189	6.00635	5.36676	5.22272	5.12035	1.59468	0.673263	1.59468	up	1.87194e-06	1.52246e-05
6782	HSPA13	heat shock protein family A (Hsp70) member 13	6.31394	6.02973	6.20913	6.80449	6.91591	6.79446	-1.57355	-0.65402	1.57355	down	6.29535e-07	6.08138e-06
101929777	LOC101929777	uncharacterized LOC101929777	6.58122	6.38147	6.47443	6.99954	6.98916	7.22502	-1.50754	-0.5922	1.50754	down	1.78124e-06	1.4617e-05
6733	SRPK2	SRSF protein kinase 2	6.74263	6.60686	6.56109	8.12383	8.11848	8.1675	-2.82792	-1.49974	2.82792	down	2.25688e-13	5.57931e-11
154064	RAET1L	retinoic acid early transcript 1L	5.84346	5.95709	5.95998	6.65258	6.44993	6.44631	-1.51162	-0.596097	1.51162	down	1.5788e-06	1.3201e-05
7319	UBE2A	ubiquitin conjugating enzyme E2A	10.3052	10.276	10.3427	9.61128	9.55004	9.56065	1.66321	0.733973	1.66321	up	2.21058e-12	2.8489e-10
286410	ATP11C	ATPase, class VI, type 11C	7.81786	7.70742	7.70799	8.99063	8.93254	9.0444	-2.3698	-1.24477	2.3698	down	2.17103e-13	5.40107e-11
2027	ENO3	enolase 3 (beta, muscle)	5.92781	5.83952	5.91088	6.51185	6.68303	6.59766	-1.62989	-0.704777	1.62989	down	7.6603e-08	1.0426e-06
677805	SNORA18	small nucleolar RNA, H/ACA box 18	7.69292	7.55888	7.69988	7.04404	7.06701	7.04731	1.51338	0.597773	1.51338	up	3.65351e-08	5.66951e-07
55013	CCDC109B	coiled-coil domain containing 109B	5.19689	5.12862	5.24135	5.55556	5.68615	6.13462	-1.51904	-0.603157	1.51904	down	0.000158004	0.000702088
7378	UPP1	uridine phosphorylase 1	9.30961	9.16781	9.13079	9.92235	9.7728	10.0704	-1.64617	-0.719113	1.64617	down	1.333e-08	2.47349e-07
323	APBB2	amyloid beta (A4) precursor protein-binding, family B, member 2	6.09676	5.88067	5.80146	6.38367	6.46788	6.68868	-1.50224	-0.587113	1.50224	down	1.66869e-05	9.92001e-05
80218	NAA50	N(alpha)-acetyltransferase 50, NatE catalytic subunit	9.25316	9.01319	9.0962	9.78707	9.8128	9.80364	-1.6025	-0.68032	1.6025	down	1.37406e-09	3.98304e-08
6645	SNTB2	syntrophin, beta 2 (dystrophin-associated protein A1, 59kDa, basic component 2)	6.64328	6.51661	6.61877	7.12439	7.23657	7.22107	-1.5169	-0.601123	1.5169	down	1.24466e-07	1.55759e-06
27068	PPA2	pyrophosphatase (inorganic) 2	8.42814	8.34985	8.5054	7.46369	7.72223	7.62768	1.7694	0.823263	1.7694	up	2.86855e-09	7.19554e-08
6470	SHMT1	serine hydroxymethyltransferase 1 (soluble)	9.9912	9.90867	9.99117	9.17014	9.22059	9.14935	1.72148	0.783653	1.72148	up	3.78259e-12	4.34743e-10
79980	DSN1	DSN1 homolog, MIS12 kinetochore complex component	9.58941	9.49935	9.49483	10.3598	10.3495	10.3237	-1.7611	-0.816473	1.7611	down	8.67747e-13	1.46287e-10
55629	PNRC2	proline rich nuclear receptor coactivator 2	9.235	9.15653	9.21698	9.78789	9.76009	9.84233	-1.50936	-0.593933	1.50936	down	1.84056e-10	8.16558e-09
54332	GDAP1	ganglioside induced differentiation associated protein 1	6.96246	6.94337	6.95365	7.77553	7.71059	7.84915	-1.77186	-0.825263	1.77186	down	3.64177e-10	1.40616e-08
79441	HAUS3	HAUS augmin like complex subunit 3	5.32953	5.12724	5.49993	5.80571	6.09864	6.11349	-1.60998	-0.687047	1.60998	down	1.16848e-05	7.3078e-05
64327	LMBR1	limb development membrane protein 1	5.40312	5.4393	5.63222	6.25774	6.21514	6.38322	-1.73366	-0.79382	1.73366	down	1.18648e-07	1.49429e-06
27445	PCLO	piccolo presynaptic cytomatrix protein	5.79268	5.7223	5.81385	6.41571	6.4852	6.55151	-1.63338	-0.707863	1.63338	down	6.6952e-08	9.33468e-07
10730	YME1L1	YME1 like 1 ATPase	9.43336	9.33578	9.38482	10.5158	10.5352	10.5939	-2.24021	-1.16364	2.24021	down	8.555e-15	6.34475e-12
150472	CBWD2	COBW domain containing 2	7.26746	7.15656	7.11384	7.97395	7.91583	7.91311	-1.68764	-0.75501	1.68764	down	1.30499e-09	3.83131e-08
6043	SNORA63	small nucleolar RNA, H/ACA box 63	9.17959	9.09422	9.27245	8.49723	8.4556	8.53419	1.60928	0.686413	1.60928	up	6.59663e-10	2.23144e-08
55071	C9orf40	chromosome 9 open reading frame 40	6.4445	6.43688	6.40144	7.0708	7.00419	7.05409	-1.532	-0.61542	1.532	down	4.81322e-08	7.08917e-07
4076	CAPRIN1	cell cycle associated protein 1	7.60918	7.63368	7.41775	8.29713	8.22012	8.2746	-1.63627	-0.710413	1.63627	down	6.86491e-09	1.43531e-07
259232	NALCN	sodium leak channel, non selective	6.47982	6.37637	6.27682	5.81385	5.71661	5.82849	1.50666	0.591353	1.50666	up	1.42913e-06	1.21249e-05
7086	TKT	transketolase	6.67305	6.57984	6.56154	7.24634	7.10778	7.34114	-1.54429	-0.626943	1.54429	down	2.38914e-07	2.69782e-06
195828	ZNF367	zinc finger protein 367	7.65322	7.61063	7.70454	8.72107	8.78516	8.79755	-2.16115	-1.1118	2.16115	down	5.80566e-13	1.07505e-10
10443	N4BP2L2	NEDD4 binding protein 2-like 2	6.70163	6.62073	6.69238	5.83927	5.76824	5.86559	1.79902	0.847213	1.79902	up	3.701e-09	8.77413e-08
117178	SSX2IP	synovial sarcoma, X breakpoint 2 interacting protein	6.95842	6.71084	6.59335	7.34358	7.41872	7.51638	-1.59331	-0.672023	1.59331	down	9.46443e-07	8.55179e-06
29924	EPN1	epsin 1	10.6056	10.6016	10.5954	9.66814	9.67421	9.61953	1.92777	0.94693	1.92777	up	1.88073e-14	9.85677e-12
10165	SLC25A13	solute carrier family 25 (aspartate/glutamate carrier), member 13	8.79355	8.81294	8.71869	9.43986	9.38552	9.46577	-1.57497	-0.655323	1.57497	down	1.39923e-10	6.54755e-09
105379283	LOC105379283	uncharacterized LOC105379283	7.41653	7.26206	7.29509	6.25706	6.28635	6.389	2.01916	1.01376	2.01916	up	2.45656e-10	1.03273e-08
206358	SLC36A1	solute carrier family 36 (proton/amino acid symporter), member 1	6.71992	6.62063	6.75556	7.85071	7.767	8.1778	-2.35077	-1.23313	2.35077	down	6.98701e-10	2.32942e-08
26135	SERBP1	SERPINE1 mRNA binding protein 1	7.87725	7.85679	7.76633	8.57954	8.61388	8.65597	-1.72071	-0.783007	1.72071	down	9.94246e-11	5.1086e-09
51200	CPA4	carboxypeptidase A4	6.81504	6.97051	6.84717	7.56924	7.35227	7.50848	-1.51476	-0.59909	1.51476	down	3.42961e-07	3.65332e-06
51340	CRNKL1	crooked neck pre-mRNA splicing factor 1	6.41981	6.41812	6.6223	7.7045	7.75929	7.81761	-2.41785	-1.27372	2.41785	down	1.28525e-11	1.05689e-09
55660	PRPF40A	pre-mRNA processing factor 40 homolog A	7.59646	7.4304	7.48552	8.21596	8.17083	8.20423	-1.61651	-0.69288	1.61651	down	2.29303e-09	5.96902e-08
7920	ABHD16A	abhydrolase domain containing 16A	7.62724	7.59483	7.80987	8.43011	8.41251	8.44692	-1.68475	-0.752533	1.68475	down	1.81246e-09	4.93025e-08
192669	AGO3	argonaute 3, RISC catalytic component	7.447	7.44594	7.47916	8.29306	8.31615	8.28087	-1.78921	-0.839327	1.78921	down	2.6335e-11	1.78782e-09
80311	KLHL15	kelch like family member 15	6.09119	5.92487	5.9377	6.74066	6.6482	6.75326	-1.65801	-0.729453	1.65801	down	5.3051e-08	7.68907e-07
132430	PABPC4L	poly(A) binding protein, cytoplasmic 4-like	6.72956	6.64724	6.57496	7.71601	7.7912	7.85638	-2.19965	-1.13728	2.19965	down	1.95924e-11	1.42879e-09
83464	APH1B	aph-1 homolog B, gamma secretase subunit	6.00575	6.01416	6.04742	6.4799	6.83082	6.86939	-1.62931	-0.70426	1.62931	down	1.64361e-06	1.36673e-05
277	AMY1B	amylase, alpha 1B (salivary)	5.35526	5.34506	5.33899	3.75544	4.40974	4.33303	2.26634	1.18037	2.26634	up	3.96963e-07	4.13008e-06
58533	SNX6	sorting nexin 6	8.76847	8.84411	8.82365	9.48997	9.47798	9.49403	-1.59687	-0.67525	1.59687	down	2.89794e-11	1.90803e-09
5806	PTX3	pentraxin 3	10.0627	9.93204	9.95713	10.6972	10.7915	10.7778	-1.70709	-0.77154	1.70709	down	7.19522e-12	6.86462e-10
93099	DMKN	dermokine	8.98609	8.9947	9.03622	8.13087	8.23185	8.23778	1.74776	0.805503	1.74776	up	2.44867e-11	1.70353e-09
2475	MTOR	mechanistic target of rapamycin (serine/threonine kinase)	9.2524	9.08755	9.26347	8.43967	8.44419	8.53249	1.65752	0.729023	1.65752	up	6.28984e-10	2.15174e-08
50807	ASAP1	ArfGAP with SH3 domain, ankyrin repeat and PH domain 1	10.681	10.6325	10.6859	9.91014	9.91587	9.97462	1.66197	0.732897	1.66197	up	1.07792e-12	1.70414e-10
220869	CBWD5	COBW domain containing 5	7.26746	7.15656	7.11384	7.97395	7.91583	7.91311	-1.68764	-0.75501	1.68764	down	1.30499e-09	3.83131e-08
5494	PPM1A	protein phosphatase, Mg2+/Mn2+ dependent 1A	4.92072	4.58577	4.82831	6.12054	6.27631	6.34077	-2.76563	-1.46761	2.76563	down	2.7798e-10	1.13925e-08
1316	KLF6	Kruppel-like factor 6	9.7316	9.57575	9.69189	8.98657	9.02778	9.16546	1.52254	0.606477	1.52254	up	7.56689e-09	1.55074e-07
10440	TIMM17A	translocase of inner mitochondrial membrane 17 homolog A (yeast)	4.77458	4.70023	4.66615	3.83415	3.94415	4.08965	1.69076	0.75767	1.69076	up	9.97759e-07	8.93981e-06
115201	ATG4A	autophagy related 4A, cysteine peptidase	7.97397	7.81101	8.04558	7.27496	7.31155	7.43535	1.51877	0.6029	1.51877	up	2.09436e-07	2.42197e-06
10867	TSPAN9	tetraspanin 9	8.64484	8.58968	8.50844	7.75815	7.68267	7.76964	1.79523	0.844167	1.79523	up	6.96263e-11	3.84923e-09
1787	TRDMT1	tRNA aspartic acid methyltransferase 1	5.35371	5.32301	5.51971	6.0715	6.0831	6.13164	-1.62068	-0.696603	1.62068	down	2.88233e-07	3.15411e-06
540	ATP7B	ATPase, Cu++ transporting, beta polypeptide	6.58875	6.34138	6.59805	5.56051	5.66296	5.6555	1.8443	0.88307	1.8443	up	2.69861e-08	4.43269e-07
51704	GPRC5B	G protein-coupled receptor, class C, group 5, member B	7.09344	7.04048	7.12555	6.33841	6.52574	6.47636	1.55795	0.639653	1.55795	up	1.14008e-07	1.44746e-06
92335	STRADA	STE20-related kinase adaptor alpha	5.4662	5.57267	5.48436	6.20834	6.17976	6.10602	-1.57676	-0.656963	1.57676	down	2.72809e-07	3.01112e-06
112858	TP53RK	TP53 regulating kinase	5.69162	5.71599	5.75015	6.36927	6.44462	6.49203	-1.64268	-0.716053	1.64268	down	4.9342e-08	7.23418e-07
144245	ALG10B	ALG10B, alpha-1,2-glucosyltransferase	5.22366	5.20236	5.18596	5.6919	5.94117	5.93806	-1.57249	-0.65305	1.57249	down	1.76901e-06	1.45469e-05
79979	TRMT2B	tRNA methyltransferase 2 homolog B	6.09634	6.36642	6.26215	7.03759	6.61352	7.233	-1.64688	-0.719733	1.64688	down	3.15116e-05	0.000171555
55884	WSB2	WD repeat and SOCS box containing 2	7.37321	7.24967	7.27709	8.40966	8.34095	8.43508	-2.13649	-1.09524	2.13649	down	3.40685e-12	4.00556e-10
55855	FAM45BP	family with sequence similarity 45, member A pseudogene	6.40212	6.21462	6.45383	6.87553	7.11054	7.07417	-1.58362	-0.663223	1.58362	down	7.5269e-07	7.07122e-06
5010	CLDN11	claudin 11	10.4178	10.3191	10.3082	10.8844	10.9686	11.1752	-1.5812	-0.661023	1.5812	down	8.9255e-09	1.77638e-07
2065	ERBB3	erb-b2 receptor tyrosine kinase 3	8.18096	8.31305	8.43978	7.60088	7.46657	7.64296	1.67148	0.741127	1.67148	up	1.69449e-08	3.01109e-07
397	ARHGDIB	Rho GDP dissociation inhibitor (GDI) beta	6.41085	6.27804	6.47443	5.27005	5.36743	5.10536	2.20405	1.14016	2.20405	up	1.79458e-09	4.892e-08
5170	PDPK1	3-phosphoinositide dependent protein kinase 1	7.90867	7.90381	7.99278	7.14093	7.16577	7.3206	1.65403	0.725987	1.65403	up	4.99204e-09	1.1086e-07
22954	TRIM32	tripartite motif containing 32	5.87207	5.2932	5.78963	4.82481	5.12587	4.51764	1.77628	0.82886	1.77628	up	8.2028e-05	0.000395762
654322	SNORA13	small nucleolar RNA, H/ACA box 13	5.73771	5.783	5.81307	4.76986	4.77983	4.71261	2.03331	1.02383	2.03331	up	1.72229e-09	4.74741e-08
8543	LMO4	LIM domain only 4	7.50555	7.44669	7.49393	8.271	8.22659	8.41194	-1.76678	-0.82112	1.76678	down	3.77895e-10	1.44494e-08
11060	WWP2	WW domain containing E3 ubiquitin protein ligase 2	8.90303	8.87569	8.84726	8.21668	8.27422	8.09423	1.60245	0.680283	1.60245	up	1.14806e-09	3.46186e-08
127018	LYPLAL1	lysophospholipase-like 1	5.52201	5.14565	5.28077	6.14858	6.34984	6.37961	-1.96773	-0.976533	1.96773	down	7.96553e-08	1.07644e-06
26286	ARFGAP3	ADP ribosylation factor GTPase activating protein 3	7.84699	7.83952	7.88627	6.65609	6.82959	6.65429	2.21034	1.14427	2.21034	up	1.51923e-11	1.19433e-09
10010	TANK	TRAF family member associated NFKB activator	8.98794	9.06006	9.10861	8.36693	8.43676	8.54835	1.51732	0.601523	1.51732	up	8.37043e-09	1.68209e-07
441191	RNF216P1	ring finger protein 216 pseudogene 1	8.11928	8.07105	8.07192	8.78076	8.76681	8.84485	-1.63587	-0.710057	1.63587	down	1.08187e-10	5.41824e-09
113146	AHNAK2	AHNAK nucleoprotein 2	9.37764	9.25884	9.47473	8.65761	8.623	8.81146	1.59444	0.673047	1.59444	up	1.0219e-08	1.99541e-07
145781	GCOM1	GRINL1A complex locus 1	7.85223	7.76567	7.69012	8.57587	8.62398	8.6014	-1.77901	-0.831077	1.77901	down	8.64812e-11	4.57512e-09
1745	DLX1	distal-less homeobox 1	7.28758	7.19695	7.248	7.94906	7.96443	8.03022	-1.66678	-0.73706	1.66678	down	7.32904e-10	2.4229e-08
9497	SLC4A7	solute carrier family 4, sodium bicarbonate cotransporter, member 7	9.32218	9.2905	9.21169	9.9635	10.032	10.0253	-1.6611	-0.73214	1.6611	down	1.36909e-11	1.10958e-09
1347	COX7A2	cytochrome c oxidase subunit VIIa polypeptide 2 (liver)	8.26063	8.18181	8.33009	8.88882	8.97643	8.90766	-1.58754	-0.666793	1.58754	down	8.92174e-10	2.8145e-08
5205	ATP8B1	ATPase, aminophospholipid transporter, class I, type 8B, member 1	6.23886	6.05508	6.03143	6.8812	6.69323	6.88719	-1.63817	-0.712083	1.63817	down	2.35447e-07	2.66633e-06
26010	SPATS2L	spermatogenesis associated, serine rich 2 like	6.16707	6.27184	6.33616	5.07103	4.96991	5.15193	2.28797	1.19407	2.28797	up	4.14254e-10	1.55225e-08
2040	STOM	stomatin	7.71811	7.52443	7.58335	8.69346	8.58035	8.79895	-2.11739	-1.08229	2.11739	down	4.78302e-11	2.81447e-09
89978	DPH6	diphthamine biosynthesis 6	4.44156	4.57461	4.32003	5.00664	5.13773	5.07688	-1.5458	-0.62835	1.5458	down	6.2568e-06	4.28013e-05
2069	EREG	epiregulin	11.206	11.2346	11.2608	10.5958	10.4549	10.6054	1.6041	0.681767	1.6041	up	2.60092e-11	1.77171e-09
3340	NDST1	N-deacetylase/N-sulfotransferase (heparan glucosaminyl) 1	7.90972	7.88638	7.87504	8.78396	8.65868	8.77206	-1.79982	-0.847853	1.79982	down	2.85409e-11	1.8895e-09
4601	MXI1	MAX interactor 1, dimerization protein	5.18769	4.90977	5.11233	4.55188	4.33308	4.46118	1.53817	0.621217	1.53817	up	1.44579e-05	8.77816e-05
29761	USP25	ubiquitin specific peptidase 25	6.36787	6.2044	6.29949	7.18485	7.16682	7.21377	-1.86334	-0.897893	1.86334	down	8.15524e-10	2.63184e-08
5255	PHKA1	phosphorylase kinase, alpha 1 (muscle)	5.77135	5.81141	5.73366	6.40805	6.34138	6.56762	-1.58763	-0.666877	1.58763	down	3.57297e-07	3.77433e-06
83943	IMMP2L	inner mitochondrial membrane peptidase subunit 2	6.44988	6.54915	6.53483	5.7631	5.57968	5.79908	1.73789	0.797333	1.73789	up	4.4599e-08	6.69615e-07
54499	TMCO1	transmembrane and coiled-coil domains 1	3.89164	3.96751	4.01785	4.74876	4.82324	4.9466	-1.84106	-0.880533	1.84106	down	1.02168e-07	1.32582e-06
5985	RFC5	replication factor C subunit 5	7.41689	7.37027	7.41171	8.85989	8.82973	8.9426	-2.7852	-1.47778	2.7852	down	1.31435e-14	7.82776e-12
4171	MCM2	minichromosome maintenance complex component 2	8.24003	8.12198	8.13507	8.79478	8.78461	8.73709	-1.52253	-0.606467	1.52253	down	1.9766e-09	5.28891e-08
57763	ANKRA2	ankyrin repeat, family A (RFXANK-like), 2	5.54493	5.43625	5.86283	6.57229	6.55848	6.58398	-1.94115	-0.956913	1.94115	down	6.29287e-08	8.88803e-07
5021	OXTR	oxytocin receptor	6.86282	6.76604	6.88655	7.63223	7.64095	7.76143	-1.78972	-0.839733	1.78972	down	8.53363e-10	2.71825e-08
65062	TMEM237	transmembrane protein 237	6.51235	6.10152	6.33695	6.98802	7.06533	7.18615	-1.69689	-0.762893	1.69689	down	6.66908e-07	6.37982e-06
6248	RSC1A1	regulatory solute carrier protein, family 1, member 1	5.97176	5.74127	5.82531	6.4999	6.39725	6.57983	-1.56505	-0.646213	1.56505	down	9.07851e-07	8.26891e-06
133	ADM	adrenomedullin	10.1736	10.241	10.2122	9.31394	9.16457	9.35179	1.90814	0.93217	1.90814	up	4.21664e-12	4.69529e-10
51134	CEP83	centrosomal protein 83kDa	4.92767	4.64626	4.94528	4.1081	4.12831	4.46237	1.52289	0.60681	1.52289	up	9.71418e-05	0.000460098
93349	SP140L	SP140 nuclear body protein like	3.89165	4.09709	3.89628	4.50088	4.65679	4.50088	-1.50647	-0.591177	1.50647	down	2.04934e-05	0.000118565
55066	PDPR	pyruvate dehydrogenase phosphatase regulatory subunit	7.06942	7.12958	7.09813	8.31887	8.32577	8.54205	-2.45636	-1.29652	2.45636	down	3.22268e-12	3.87382e-10
4179	CD46	CD46 molecule, complement regulatory protein	10.0833	10.0365	10.1881	9.07305	9.0096	9.13006	2.04447	1.03173	2.04447	up	8.24438e-13	1.40287e-10
7428	VHL	von Hippel-Lindau tumor suppressor, E3 ubiquitin protein ligase	9.08443	8.98898	8.96458	9.66203	9.67742	9.70504	-1.58979	-0.668833	1.58979	down	7.54312e-11	4.07837e-09
25903	OLFML2B	olfactomedin like 2B	5.14366	5.45254	5.18361	4.4613	4.72671	4.6952	1.54993	0.6322	1.54993	up	2.36721e-05	0.000134249
26872	STEAP1	six transmembrane epithelial antigen of the prostate 1	6.88557	6.87111	6.72399	7.39542	7.33801	7.63211	-1.54573	-0.62829	1.54573	down	8.33208e-07	7.70791e-06
113251	LARP4	La ribonucleoprotein domain family member 4	8.75906	8.61561	8.64974	7.94034	7.83159	7.87667	1.7314	0.791937	1.7314	up	1.99556e-10	8.7544e-09
60526	LDAH	lipid droplet associated hydrolase	6.22476	5.73326	5.87021	6.73327	6.83035	6.83717	-1.81192	-0.85752	1.81192	down	5.63546e-07	5.53091e-06
7130	TNFAIP6	TNF alpha induced protein 6	6.60284	6.69128	6.65202	5.67501	5.95033	6.09791	1.67129	0.740963	1.67129	up	1.1036e-06	9.74591e-06
10783	NEK6	NIMA-related kinase 6	7.91254	7.92633	7.89661	7.28255	7.2843	7.40876	1.50173	0.586623	1.50173	up	2.08372e-08	3.5735e-07
1184	CLCN5	chloride channel, voltage-sensitive 5	6.67193	6.52168	6.46301	7.55785	7.44663	7.64742	-1.99782	-0.998427	1.99782	down	7.77358e-10	2.53153e-08
54926	UBE2R2	ubiquitin conjugating enzyme E2R 2	6.8756	6.81953	6.97186	7.86514	7.85345	7.86216	-1.96054	-0.971253	1.96054	down	4.80586e-11	2.82367e-09
5711	PSMD5	proteasome 26S subunit, non-ATPase 5	7.58186	7.29111	7.45212	8.36433	8.45639	8.4354	-1.96838	-0.97701	1.96838	down	3.41699e-10	1.33881e-08
7716	VEZF1	vascular endothelial zinc finger 1	7.50472	7.53651	7.67907	8.19012	8.32615	8.19764	-1.58506	-0.664537	1.58506	down	1.36638e-08	2.51915e-07
10654	PMVK	phosphomevalonate kinase	8.51359	8.49596	8.61011	7.73249	7.73243	7.82332	1.71373	0.77714	1.71373	up	1.97241e-10	8.6625e-09
7799	PRDM2	PR domain containing 2, with ZNF domain	7.68387	7.76554	7.67403	8.45456	8.39047	8.42833	-1.64335	-0.71664	1.64335	down	3.24152e-10	1.28442e-08
5728	PTEN	phosphatase and tensin homolog	4.06257	3.9342	4.06848	4.94065	4.8507	5.13326	-1.93606	-0.95312	1.93606	down	7.96646e-08	1.07644e-06
79768	KATNBL1	katanin p80 subunit B-like 1	5.87012	5.50211	5.87816	6.64023	6.69153	6.72162	-1.911	-0.93433	1.911	down	6.7048e-08	9.34227e-07
65005	MRPL9	mitochondrial ribosomal protein L9	9.24485	9.19993	9.3089	9.93568	9.85847	9.99588	-1.60079	-0.678783	1.60079	down	1.40658e-10	6.56632e-09
4507	MTAP	methylthioadenosine phosphorylase	7.56558	7.39306	7.46417	8.13698	8.10549	8.18968	-1.59083	-0.66978	1.59083	down	5.51062e-09	1.20471e-07
140733	MACROD2	MACRO domain containing 2	7.71264	7.64134	7.75258	6.84511	6.78709	6.90913	1.80885	0.855077	1.80885	up	4.17263e-10	1.56055e-08
80777	CYB5B	cytochrome b5 type B (outer mitochondrial membrane)	6.16796	6.15482	5.92128	6.82552	6.99576	6.79415	-1.72962	-0.790457	1.72962	down	1.08206e-07	1.38587e-06
51277	DNAJC27	DnaJ heat shock protein family (Hsp40) member C27	3.9358	4.14174	4.25741	5.26038	5.39528	5.14801	-2.22876	-1.15624	2.22876	down	1.42358e-08	2.60749e-07
51029	DESI2	desumoylating isopeptidase 2	8.36141	8.34985	8.29938	10.0378	10.0454	10.0401	-3.25846	-1.70419	3.25846	down	4.43683e-17	2.90664e-13
105370447	LOC105370447	uncharacterized LOC105370447	8.76847	8.84411	8.82365	9.48997	9.47798	9.49403	-1.59687	-0.67525	1.59687	down	2.89794e-11	1.90803e-09
1303	COL12A1	collagen, type XII, alpha 1	9.20856	9.22582	9.41262	7.91266	7.90741	7.96439	2.55652	1.35418	2.55652	up	2.32448e-13	5.67505e-11
8634	RTCA	RNA 3'-terminal phosphate cyclase	7.48026	7.44409	7.4374	8.43438	8.46928	8.51518	-2.02656	-1.01903	2.02656	down	2.19421e-12	2.8371e-10
444	ASPH	aspartate beta-hydroxylase	7.38125	7.32588	7.30865	6.65927	6.64761	6.63406	1.61509	0.691613	1.61509	up	5.2679e-09	1.16003e-07
54954	FAM120C	family with sequence similarity 120C	5.82582	5.46225	5.43008	6.18725	6.47161	6.16439	-1.62642	-0.7017	1.62642	down	1.33663e-05	8.20408e-05
353	APRT	adenine phosphoribosyltransferase	11.2326	11.1189	11.1946	9.97358	10.0424	9.9256	2.29978	1.2015	2.29978	up	8.18658e-15	6.30961e-12
51091	SEPSECS	Sep (O-phosphoserine) tRNA:Sec (selenocysteine) tRNA synthase	4.00901	4.0746	3.89198	4.92131	4.69706	4.6749	-1.7083	-0.77256	1.7083	down	1.21192e-06	1.05719e-05
29101	SSU72	SSU72 homolog, RNA polymerase II CTD phosphatase	8.83843	8.7979	8.94843	8.09455	8.14481	8.17709	1.65035	0.72277	1.65035	up	3.71233e-10	1.4264e-08
9575	CLOCK	clock circadian regulator	6.4554	6.22471	6.23529	6.97636	7.07652	6.84944	-1.58261	-0.662307	1.58261	down	6.93289e-07	6.59993e-06
5868	RAB5A	RAB5A, member RAS oncogene family	8.95545	8.78546	8.90398	7.17409	7.38247	7.4109	2.94679	1.55914	2.94679	up	4.74948e-13	9.24167e-11
9342	SNAP29	synaptosome associated protein 29kDa	5.57398	5.55723	5.78236	6.13302	6.23686	6.31403	-1.50536	-0.590113	1.50536	down	4.32803e-06	3.11693e-05
51094	ADIPOR1	adiponectin receptor 1	7.372	7.19376	7.22009	8.3925	8.34155	8.38366	-2.15938	-1.11062	2.15938	down	6.44213e-12	6.33052e-10
10490	VTI1B	vesicle transport through interaction with t-SNAREs 1B	6.98162	6.91397	6.91235	6.05735	6.04167	6.22746	1.77418	0.827153	1.77418	up	7.69315e-09	1.57007e-07
23507	LRRC8B	leucine-rich repeat containing 8 family member B	8.14313	7.99076	8.11939	8.66744	8.71759	8.64322	-1.50698	-0.591657	1.50698	down	7.36124e-09	1.51755e-07
64854	USP46	ubiquitin specific peptidase 46	4.51537	4.33726	4.21285	5.55445	5.74043	5.87753	-2.58287	-1.36898	2.58287	down	1.74661e-09	4.80052e-08
81543	LRRC3	leucine rich repeat containing 3	6.05595	5.95417	6.23375	5.27553	5.54389	5.24966	1.65282	0.72493	1.65282	up	2.3419e-06	1.84549e-05
79465	ULBP3	UL16 binding protein 3	4.38738	3.68234	4.2847	4.75388	4.62005	4.89812	-1.55748	-0.63921	1.55748	down	0.000689074	0.00254443
23657	SLC7A11	solute carrier family 7 (anionic amino acid transporter light chain, xc- system), member 11	6.61349	6.46307	6.64127	7.7127	7.5178	7.60344	-2.05438	-1.0387	2.05438	down	2.86748e-10	1.16638e-08
1437	CSF2	colony stimulating factor 2 (granulocyte-macrophage)	7.76404	7.69598	7.93309	8.38507	8.42609	8.36585	-1.51009	-0.594633	1.51009	down	5.44653e-08	7.85927e-07
3843	IPO5	importin 5	7.11346	6.88303	6.94744	7.84787	7.9115	7.90712	-1.87582	-0.90752	1.87582	down	5.8151e-10	2.01565e-08
80155	NAA15	N(alpha)-acetyltransferase 15, NatA auxiliary subunit	8.09036	8.01878	8.09403	7.26724	7.19987	7.15043	1.8174	0.861877	1.8174	up	1.11807e-10	5.54201e-09
22900	CARD8	caspase recruitment domain family member 8	5.4839	5.50587	5.57247	6.43284	6.39141	6.45712	-1.87433	-0.906377	1.87433	down	2.36212e-09	6.10039e-08
23677	SH3BP4	SH3-domain binding protein 4	9.1176	9.10278	9.19375	9.97967	9.91812	10.0287	-1.78689	-0.837453	1.78689	down	3.4138e-12	4.00556e-10
5279	PIGC	phosphatidylinositol glycan anchor biosynthesis class C	8.3479	8.20941	8.29972	8.91362	8.80817	8.95351	-1.52213	-0.60609	1.52213	down	6.81329e-09	1.42908e-07
7267	TTC3	tetratricopeptide repeat domain 3	9.38119	9.22044	9.35764	8.57345	8.73267	8.74908	1.5526	0.63469	1.5526	up	8.90419e-09	1.77303e-07
79096	C11orf49	chromosome 11 open reading frame 49	8.33878	8.16059	8.20754	7.49121	7.61165	7.59181	1.5919	0.670747	1.5919	up	8.83818e-09	1.76257e-07
55634	KRBOX4	KRAB box domain containing 4	7.17998	7.10081	7.02544	7.76301	7.71369	7.8391	-1.59091	-0.669857	1.59091	down	1.31412e-08	2.44459e-07
144811	LACC1	laccase (multicopper oxidoreductase) domain containing 1	6.11354	5.85875	5.96153	6.56003	6.53721	6.66165	-1.52452	-0.608357	1.52452	down	1.41235e-06	1.20163e-05
2786	GNG4	guanine nucleotide binding protein (G protein), gamma 4	6.26845	6.08632	6.1976	6.62994	6.75974	6.93961	-1.50766	-0.592307	1.50766	down	3.96899e-06	2.89549e-05
586	BCAT1	branched chain amino-acid transaminase 1, cytosolic	8.54851	8.48215	8.52855	9.29865	9.28581	9.24772	-1.69074	-0.757657	1.69074	down	1.18588e-11	9.96008e-10
55707	NECAP2	NECAP endocytosis associated 2	8.96025	9.0116	8.98727	8.41801	8.39198	8.32006	1.52593	0.60969	1.52593	up	6.40147e-10	2.18044e-08
147657	ZNF480	zinc finger protein 480	7.25305	7.29558	7.28306	6.20072	6.38656	6.23966	2.0022	1.00158	2.0022	up	2.60391e-10	1.08309e-08
84923	FAM104A	family with sequence similarity 104 member A	5.17392	5.10564	5.16302	6.24975	6.0972	6.18927	-2.04374	-1.03121	2.04374	down	1.26142e-09	3.73083e-08
100529207	RAD51L3-RFFL	RAD51L3-RFFL readthrough	7.74253	7.80095	7.79098	8.36893	8.40783	8.35916	-1.51623	-0.600487	1.51623	down	1.94713e-09	5.23142e-08
1364	CLDN4	claudin 4	4.97578	5.09416	4.70162	5.58556	5.64336	6.04932	-1.78455	-0.83556	1.78455	down	7.82861e-06	5.18744e-05
10379	IRF9	interferon regulatory factor 9	7.01062	6.95197	7.01062	7.4426	7.40849	7.9236	-1.51623	-0.600493	1.51623	down	3.68621e-05	0.000196573
9538	EI24	etoposide induced 2.4	9.50362	9.40141	9.51751	10.1652	10.2671	10.2552	-1.68758	-0.754957	1.68758	down	1.76261e-11	1.32472e-09
619505	SNORA21	small nucleolar RNA, H/ACA box 21	7.64338	7.52833	7.67149	6.88776	6.90403	6.94613	1.62649	0.70176	1.62649	up	5.74453e-09	1.24614e-07
154007	SNRNP48	small nuclear ribonucleoprotein, U11/U12 48KDa subunit	5.80594	5.61098	5.50589	6.50257	6.50875	6.54348	-1.83697	-0.87733	1.83697	down	2.68406e-08	4.41802e-07
79692	ZNF322	zinc finger protein 322	7.58141	7.47787	7.61858	6.86788	6.95945	7.00475	1.53183	0.61526	1.53183	up	5.94904e-08	8.46936e-07
102723737	CT45A8	cancer/testis antigen family 45, member A8	7.17178	7.35035	7.34255	6.59623	6.57423	6.45535	1.67747	0.74629	1.67747	up	2.21146e-08	3.76466e-07
387921	NHLRC3	NHL repeat containing 3	5.46521	5.35672	5.34865	6.64267	6.65109	6.69829	-2.41802	-1.27382	2.41802	down	2.64058e-11	1.78954e-09
8714	ABCC3	ATP binding cassette subfamily C member 3	7.16577	7.08275	6.94219	7.66476	7.84306	7.87963	-1.66122	-0.732247	1.66122	down	4.30596e-08	6.50229e-07
9255	AIMP1	aminoacyl tRNA synthetase complex-interacting multifunctional protein 1	9.65003	9.62498	9.58002	8.63657	8.75922	8.70989	1.88747	0.91645	1.88747	up	1.7101e-12	2.40928e-10
54464	XRN1	5'-3' exoribonuclease 1	7.70759	7.64967	7.61628	8.36263	8.41056	8.40895	-1.66578	-0.7362	1.66578	down	2.04163e-10	8.92661e-09
8829	NRP1	neuropilin 1	4.89621	4.96516	4.74635	6.18968	5.97924	6.12492	-2.34357	-1.22871	2.34357	down	7.86792e-10	2.55591e-08
672	BRCA1	breast cancer 1	7.4859	7.50678	7.33169	8.15755	8.0857	7.91938	-1.52917	-0.612753	1.52917	down	2.07963e-07	2.40849e-06
6546	SLC8A1	solute carrier family 8 (sodium/calcium exchanger), member 1	5.35626	5.17614	5.23968	6.4009	6.30117	6.44605	-2.18154	-1.12535	2.18154	down	5.91891e-10	2.04622e-08
205	AK4	adenylate kinase 4	9.64016	9.6511	9.53254	10.2383	10.1667	10.246	-1.52524	-0.60904	1.52524	down	2.12336e-10	9.22241e-09
10675	CSPG5	chondroitin sulfate proteoglycan 5 (neuroglycan C)	7.56224	7.59282	7.48553	6.78366	7.02151	6.94953	1.5461	0.62863	1.5461	up	1.45457e-07	1.77727e-06
5576	PRKAR2A	protein kinase, cAMP-dependent, regulatory subunit type II alpha	6.48439	6.34512	6.33862	5.67753	5.65831	5.75407	1.61635	0.69274	1.61635	up	1.3778e-07	1.69772e-06
84419	C15orf48	chromosome 15 open reading frame 48	11.4726	11.4277	11.3844	12.148	12.1715	12.2619	-1.70005	-0.76558	1.70005	down	5.5221e-13	1.03361e-10
10914	PAPOLA	poly(A) polymerase alpha	5.62441	5.3661	5.47564	6.42448	6.50122	6.41903	-1.94467	-0.959527	1.94467	down	6.39693e-09	1.36284e-07
23608	MKRN1	makorin ring finger protein 1	8.03432	7.79227	7.89244	8.97797	9.00375	9.02414	-2.13703	-1.09561	2.13703	down	7.90813e-12	7.40107e-10
182	JAG1	jagged 1	5.182	5.28332	5.08668	5.94314	5.75138	5.74495	-1.54666	-0.629157	1.54666	down	3.18148e-06	2.40443e-05
79027	ZNF655	zinc finger protein 655	8.64346	8.62046	8.53444	9.24433	9.20636	9.27942	-1.56257	-0.643917	1.56257	down	3.03033e-10	1.21544e-08
1054	CEBPG	CCAAT/enhancer binding protein (C/EBP), gamma	8.7308	8.63118	8.67322	9.32169	9.34073	9.39604	-1.59596	-0.67442	1.59596	down	1.05772e-10	5.34396e-09
159371	SLC35G1	solute carrier family 35 member G1	6.68537	6.44924	6.50643	7.25467	7.22161	7.16019	-1.58573	-0.665143	1.58573	down	1.2416e-07	1.55426e-06
55110	MAGOHB	mago homolog B, exon junction complex core component	5.34884	5.03814	5.18276	5.89549	5.707	5.75911	-1.51287	-0.597287	1.51287	down	1.21839e-05	7.58015e-05
11017	SNRNP27	small nuclear ribonucleoprotein, U4/U6.U5 27kDa subunit	8.77694	8.81613	8.89276	9.53125	9.55353	9.61774	-1.6689	-0.738897	1.6689	down	3.70484e-11	2.30421e-09
25836	NIPBL	Nipped-B homolog (Drosophila)	6.34201	5.96628	6.10205	6.71501	6.67174	6.81156	-1.51151	-0.59599	1.51151	down	7.36071e-06	4.91802e-05
8357	HIST1H3H	histone cluster 1, H3h	5.6067	5.32266	5.50187	6.33281	6.12971	6.56305	-1.82106	-0.86478	1.82106	down	7.67856e-07	7.19306e-06
146057	TTBK2	tau tubulin kinase 2	6.37233	6.41693	6.36429	7.0377	6.94878	7.00455	-1.5289	-0.612493	1.5289	down	6.83016e-08	9.46875e-07
2013	EMP2	epithelial membrane protein 2	7.29953	7.13469	7.20359	8.03873	7.96781	7.99168	-1.72525	-0.786803	1.72525	down	7.7363e-10	2.52148e-08
387640	SKIDA1	SKI/DACH domain containing 1	4.85566	4.69259	4.64544	5.32596	5.41166	5.61233	-1.64576	-0.718753	1.64576	down	2.22016e-06	1.76263e-05
79598	CEP97	centrosomal protein 97kDa	5.97115	5.68245	5.79167	6.51384	6.44941	6.49987	-1.59396	-0.672617	1.59396	down	5.97373e-07	5.81211e-06
65124	SOWAHC	sosondowah ankyrin repeat domain family member C	7.9699	7.87089	7.84092	8.77345	8.84262	8.88036	-1.91619	-0.93824	1.91619	down	1.24163e-11	1.02747e-09
4087	SMAD2	SMAD family member 2	8.96659	8.84524	9.09334	8.27927	8.32854	8.477	1.52286	0.606787	1.52286	up	1.10481e-07	1.4095e-06
10166	SLC25A15	solute carrier family 25 (mitochondrial carrier; ornithine transporter) member 15	7.73246	7.61902	7.70461	8.38839	8.40328	8.47676	-1.66722	-0.737447	1.66722	down	4.03739e-10	1.51973e-08
619568	SNORA4	small nucleolar RNA, H/ACA box 4	7.20244	6.90191	7.31652	6.45843	6.57107	6.46601	1.56026	0.641787	1.56026	up	3.77731e-06	2.78355e-05
5469	MED1	mediator complex subunit 1	8.52066	8.40409	8.59109	9.14256	9.06593	9.15883	-1.53385	-0.61716	1.53385	down	4.63012e-09	1.04596e-07
3096	HIVEP1	human immunodeficiency virus type I enhancer binding protein 1	6.7348	6.47016	6.55505	7.34037	7.28163	7.45531	-1.70815	-0.772433	1.70815	down	4.28814e-08	6.48036e-07
3930	LBR	lamin B receptor	6.72725	6.4985	6.76048	7.33145	7.42699	7.36	-1.63664	-0.710737	1.63664	down	7.97316e-08	1.07698e-06
11212	PROSC	proline synthetase co-transcribed homolog (bacterial)	8.46318	8.2712	8.40079	7.72086	7.68559	7.89533	1.52746	0.61113	1.52746	up	1.09874e-07	1.40312e-06
55824	PAG1	phosphoprotein membrane anchor with glycosphingolipid microdomains 1	5.20274	5.073	5.08784	6.15429	6.0642	6.26243	-2.05496	-1.03911	2.05496	down	2.58481e-09	6.61035e-08
10966	RAB40B	RAB40B, member RAS oncogene family	7.9874	7.80911	8.07123	7.25622	7.41655	7.33746	1.53599	0.61917	1.53599	up	2.16387e-07	2.48845e-06
6274	S100A3	S100 calcium binding protein A3	7.24396	7.2628	7.41887	8.12099	8.20978	8.35614	-1.89267	-0.920427	1.89267	down	9.25928e-10	2.90466e-08
51272	BET1L	Bet1 golgi vesicular membrane trafficking protein like	8.63966	8.5693	8.56087	7.62332	7.68977	7.73077	1.8773	0.908657	1.8773	up	1.5063e-11	1.18892e-09
54946	SLC41A3	solute carrier family 41, member 3	7.71407	7.74165	7.70016	7.06363	7.18056	7.14417	1.50438	0.589173	1.50438	up	2.30156e-08	3.88773e-07
84312	BRMS1L	breast cancer metastasis-suppressor 1-like	7.64975	7.5617	7.59562	8.27034	8.34325	8.37654	-1.65598	-0.727687	1.65598	down	4.78293e-10	1.72716e-08
9743	ARHGAP32	Rho GTPase activating protein 32	4.80533	4.6872	4.41084	5.14281	5.29475	5.41488	-1.56883	-0.64969	1.56883	down	2.76863e-05	0.000153579
84268	RPAIN	RPA interacting protein	7.6158	7.63885	7.68312	8.44827	8.53089	8.60198	-1.84181	-0.881123	1.84181	down	4.6656e-11	2.74949e-09
222658	KCTD20	potassium channel tetramerization domain containing 20	7.43776	7.3421	7.56345	6.48082	6.5118	6.59697	1.88937	0.917907	1.88937	up	1.25884e-09	3.72599e-08
23710	GABARAPL1	GABA(A) receptor-associated protein like 1	7.82045	7.78613	8.01224	8.50988	8.4649	8.66722	-1.59593	-0.674393	1.59593	down	4.7128e-08	6.98211e-07
8649	LAMTOR3	late endosomal/lysosomal adaptor, MAPK and MTOR activator 3	5.60823	5.69039	5.60823	6.6047	6.48394	6.75542	-1.97119	-0.97907	1.97119	down	4.51334e-09	1.02904e-07
10944	C11orf58	chromosome 11 open reading frame 58	7.11327	7.04707	7.03482	7.62768	7.69476	7.67164	-1.51534	-0.59964	1.51534	down	1.69087e-08	3.00737e-07
84542	KIAA1841	KIAA1841	6.66627	6.64438	6.66803	7.31819	7.34731	7.42305	-1.62821	-0.70329	1.62821	down	5.35008e-09	1.17418e-07
549	AUH	AU RNA binding protein/enoyl-CoA hydratase	7.18573	7.06617	7.15515	7.7045	7.88851	7.8653	-1.60631	-0.683753	1.60631	down	1.8036e-08	3.16775e-07
153768	PRELID2	PRELI domain containing 2	5.76672	5.62701	5.70749	6.45943	6.53055	6.68331	-1.81172	-0.857357	1.81172	down	1.93786e-08	3.36297e-07
871	SERPINH1	serpin peptidase inhibitor, clade H (heat shock protein 47), member 1, (collagen binding protein 1)	9.00278	8.90803	8.97852	9.77328	9.74028	9.86021	-1.7754	-0.828147	1.7754	down	7.42688e-12	7.03442e-10
89796	NAV1	neuron navigator 1	7.8959	7.85024	7.7917	8.57453	8.48619	8.54418	-1.61219	-0.68902	1.61219	down	5.76363e-10	2.00133e-08
51390	AIG1	androgen-induced 1	7.98078	7.8976	7.87192	7.2246	7.25762	7.40086	1.53944	0.622407	1.53944	up	3.50246e-08	5.45913e-07
10797	MTHFD2	methylenetetrahydrofolate dehydrogenase (NADP+ dependent) 2, methenyltetrahydrofolate cyclohydrolase	10.3527	10.2624	10.378	10.9999	11.0085	11.0018	-1.59365	-0.672333	1.59365	down	4.93429e-12	5.2848e-10
29098	RANGRF	RAN guanine nucleotide release factor	9.92148	9.91177	9.92693	9.27901	9.28037	9.3017	1.55082	0.633033	1.55082	up	1.17504e-11	9.8989e-10
2239	GPC4	glypican 4	4.43152	4.36709	4.1758	5.23525	5.20001	5.34321	-1.91148	-0.934687	1.91148	down	6.09526e-08	8.64309e-07
23197	FAF2	Fas associated factor family member 2	6.60001	6.61279	6.61176	7.29777	7.31636	7.47844	-1.68881	-0.756003	1.68881	down	6.93358e-09	1.44736e-07
7364	UGT2B7	UDP glucuronosyltransferase 2 family, polypeptide B7	7.95353	7.90511	7.92258	7.00063	7.16896	7.21751	1.73874	0.79804	1.73874	up	2.02936e-09	5.41534e-08
11319	ECD	ecdysoneless homolog (Drosophila)	7.10376	7.0706	7.10192	8.14623	8.23213	8.31757	-2.20363	-1.13988	2.20363	down	3.81795e-12	4.36257e-10
6599	SMARCC1	SWI/SNF related, matrix associated, actin dependent regulator of chromatin, subfamily c, member 1	9.05652	9.06846	8.94397	8.10011	8.03923	8.01414	1.96132	0.971823	1.96132	up	4.29143e-12	4.76507e-10
23261	CAMTA1	calmodulin binding transcription activator 1	6.30304	6.15824	6.24337	6.90815	6.92338	7.10028	-1.67294	-0.742387	1.67294	down	4.5999e-08	6.85775e-07
2773	GNAI3	guanine nucleotide binding protein (G protein), alpha inhibiting activity polypeptide 3	8.57308	8.38769	8.55232	9.10591	9.11054	9.10464	-1.51852	-0.602667	1.51852	down	4.92056e-09	1.09582e-07
57695	USP37	ubiquitin specific peptidase 37	6.49317	6.44695	6.4363	7.21909	7.27284	7.24126	-1.7238	-0.78559	1.7238	down	1.42848e-09	4.10747e-08
148103	ZNF599	zinc finger protein 599	4.08175	4.06937	3.89932	4.47784	4.90431	4.49084	-1.52363	-0.607517	1.52363	down	0.00011284	0.000524898
276	AMY1A	amylase, alpha 1A (salivary)	5.35526	5.34506	5.33899	3.75544	4.40974	4.33303	2.26634	1.18037	2.26634	up	3.96963e-07	4.13008e-06
55837	EAPP	E2F-associated phosphoprotein	7.23274	7.14068	7.22601	8.04742	8.13676	8.21832	-1.91104	-0.934357	1.91104	down	9.41838e-11	4.87116e-09
6309	SC5D	sterol-C5-desaturase	6.86769	6.63799	6.70588	7.71288	7.79331	7.84493	-2.06554	-1.04652	2.06554	down	1.80909e-10	8.04495e-09
26112	CCDC69	coiled-coil domain containing 69	7.31801	7.234	7.27437	6.59405	6.63649	6.69163	1.55265	0.634737	1.55265	up	2.81198e-08	4.57872e-07
144717	FAM109A	family with sequence similarity 109 member A	7.32231	7.41012	7.30152	6.72775	6.67271	6.73052	1.55221	0.634323	1.55221	up	2.49214e-08	4.15078e-07
4678	NASP	nuclear autoantigenic sperm protein (histone-binding)	6.95132	7.07563	6.99224	7.89636	7.83839	7.93574	-1.84519	-0.883767	1.84519	down	1.60488e-10	7.29284e-09
27235	COQ2	coenzyme Q2 4-hydroxybenzoate polyprenyltransferase	7.60391	7.33318	7.495	8.02921	8.039	8.14595	-1.50945	-0.594023	1.50945	down	2.47855e-07	2.78117e-06
3021	H3F3B	H3 histone, family 3B (H3.3B)	8.41493	8.39371	8.38656	9.61045	9.5697	9.6714	-2.3275	-1.21878	2.3275	down	1.75195e-14	9.30595e-12
2305	FOXM1	forkhead box M1	6.51858	6.6625	6.53048	7.22186	7.14619	7.19393	-1.53348	-0.616807	1.53348	down	8.79556e-08	1.168e-06
203197	C9orf91	chromosome 9 open reading frame 91	4.49952	4.05967	4.31223	5.65395	5.6333	5.94068	-2.73619	-1.45217	2.73619	down	3.64412e-09	8.66542e-08
10447	FAM3C	family with sequence similarity 3 member C	9.91599	9.80547	9.86563	8.72845	8.77479	8.69562	2.18769	1.12941	2.18769	up	5.90787e-14	2.15019e-11
12	SERPINA3	serpin peptidase inhibitor, clade A (alpha-1 antiproteinase, antitrypsin), member 3	5.38002	5.33617	4.92347	5.86691	6.14131	5.88596	-1.68355	-0.751507	1.68355	down	1.16005e-05	7.26313e-05
10923	SUB1	SUB1 homolog, transcriptional regulator	7.70942	7.69988	7.76486	8.38839	8.38759	8.18339	-1.51055	-0.59507	1.51055	down	5.3522e-08	7.74021e-07
80312	TET1	tet methylcytosine dioxygenase 1	4.31883	4.42572	4.38911	5.66187	5.63248	6.16161	-2.71465	-1.44077	2.71465	down	6.84715e-09	1.43313e-07
85458	DIXDC1	DIX domain containing 1	5.75756	5.30976	5.32494	6.66796	6.64445	6.61842	-2.26502	-1.17952	2.26502	down	1.18816e-08	2.24102e-07
9943	OXSR1	oxidative stress responsive 1	8.30671	8.20459	8.23143	9.12871	9.09429	9.17252	-1.84582	-0.884263	1.84582	down	5.60137e-12	5.71878e-10
2310	FOXO3B	forkhead box O3B pseudogene	8.17026	8.06009	8.05035	8.65446	8.70606	8.78825	-1.53974	-0.62269	1.53974	down	4.40595e-09	1.00806e-07
57089	ENTPD7	ectonucleoside triphosphate diphosphohydrolase 7	6.1893	6.06758	6.16173	7.26801	7.23616	7.46824	-2.273	-1.1846	2.273	down	1.07538e-10	5.39967e-09
54742	LY6K	lymphocyte antigen 6 complex, locus K	6.62874	6.59393	6.60809	7.362	7.32283	7.47057	-1.71105	-0.77488	1.71105	down	2.64581e-09	6.71828e-08
98	ACYP2	acylphosphatase 2, muscle type	5.19676	5.17095	5.43476	4.33561	4.56096	4.52017	1.73537	0.795243	1.73537	up	9.14455e-07	8.31734e-06
51232	CRIM1	cysteine rich transmembrane BMP regulator 1 (chordin-like)	9.35444	9.28213	9.25867	10.1311	10.0146	10.038	-1.69678	-0.7628	1.69678	down	1.42727e-11	1.14204e-09
23111	SPG20	spastic paraplegia 20 (Troyer syndrome)	4.99679	4.94248	4.80569	5.78797	5.75325	5.88317	-1.85722	-0.893143	1.85722	down	2.693e-08	4.42872e-07
51108	METTL9	methyltransferase like 9	6.14962	6.0664	6.33933	6.80201	6.7827	6.77537	-1.51737	-0.601577	1.51737	down	1.05901e-06	9.42414e-06
55041	PLEKHB2	pleckstrin homology domain containing B2	9.14362	9.09603	9.08163	8.51725	8.47449	8.47858	1.53367	0.616987	1.53367	up	2.28074e-10	9.77635e-09
54819	ZCCHC10	zinc finger, CCHC domain containing 10	4.5588	4.53748	4.56796	5.18826	5.41031	5.26752	-1.66319	-0.73395	1.66319	down	5.01387e-07	5.0186e-06
100037417	DDTL	D-dopachrome tautomerase-like	9.49416	9.46608	9.49593	10.2246	10.1687	10.231	-1.65026	-0.722693	1.65026	down	2.19265e-12	2.8371e-10
3487	IGFBP4	insulin like growth factor binding protein 4	7.82405	7.75556	7.88488	8.87974	8.8351	8.99071	-2.11455	-1.08035	2.11455	down	3.86143e-12	4.39945e-10
9392	TGFBRAP1	transforming growth factor beta receptor associated protein 1	6.9836	6.82099	7.02432	7.42251	7.46593	7.72655	-1.51085	-0.59536	1.51085	down	2.47828e-06	1.93858e-05
84803	GPAT3	glycerol-3-phosphate acyltransferase 3	6.60997	6.21134	6.54136	7.198	7.11002	7.40972	-1.72312	-0.785023	1.72312	down	1.16201e-06	1.01908e-05
1573	CYP2J2	cytochrome P450, family 2, subfamily J, polypeptide 2	6.87166	6.68666	6.73316	5.85697	5.78532	5.96912	1.85749	0.893357	1.85749	up	8.013e-09	1.62438e-07
11266	DUSP12	dual specificity phosphatase 12	9.22748	9.13928	9.14871	9.7647	9.78338	9.80677	-1.52957	-0.613127	1.52957	down	9.25921e-11	4.80782e-09
51175	TUBE1	tubulin, epsilon 1	6.84751	6.72242	6.81317	7.55023	7.5148	7.61537	-1.70027	-0.765767	1.70027	down	2.25685e-09	5.89436e-08
83695	RHNO1	RAD9-HUS1-RAD1 interacting nuclear orphan 1	7.73243	7.64928	7.59435	9.22796	9.15423	9.24381	-2.92813	-1.54998	2.92813	down	8.41678e-15	6.34475e-12
79817	MOB3B	MOB kinase activator 3B	5.79713	5.78032	5.59455	6.30146	6.3081	6.48115	-1.55786	-0.63957	1.55786	down	1.34916e-06	1.15512e-05
51199	NIN	ninein	6.15245	6.17848	6.15669	5.39984	5.38732	5.56026	1.63966	0.7134	1.63966	up	1.48788e-07	1.81233e-06
2690	GHR	growth hormone receptor	5.95866	5.6982	5.90867	6.53789	6.51179	6.43908	-1.55949	-0.641077	1.55949	down	9.66925e-07	8.7072e-06
5202	PFDN2	prefoldin subunit 2	9.63315	9.55066	9.69866	9.05071	8.95931	9.10359	1.50485	0.58962	1.50485	up	3.56196e-09	8.50608e-08
133418	EMB	embigin	8.62075	8.42994	8.4907	9.20956	9.21488	9.2604	-1.6409	-0.714483	1.6409	down	4.51924e-10	1.65591e-08
7128	TNFAIP3	TNF alpha induced protein 3	7.55537	7.53138	7.56631	8.48143	8.39146	8.50412	-1.87642	-0.907983	1.87642	down	1.59313e-11	1.22787e-09
5792	PTPRF	protein tyrosine phosphatase, receptor type, F	6.45865	6.40712	6.52	7.21852	6.96942	7.31344	-1.63037	-0.705203	1.63037	down	3.9069e-07	4.07343e-06
9586	CREB5	cAMP responsive element binding protein 5	6.01827	5.59846	6.08929	6.80006	6.68342	6.83291	-1.82782	-0.870123	1.82782	down	7.75162e-07	7.24769e-06
644019	CBWD6	COBW domain containing 6	7.26746	7.15656	7.11384	7.97395	7.91583	7.91311	-1.68764	-0.75501	1.68764	down	1.30499e-09	3.83131e-08
55892	MYNN	myoneurin	6.56726	6.3742	6.58476	7.24977	7.15129	7.28242	-1.64614	-0.719087	1.64614	down	5.22807e-08	7.59703e-07
3836	KPNA1	karyopherin alpha 1	7.45071	7.35342	7.4483	8.09761	8.07145	8.16126	-1.61623	-0.69263	1.61623	down	1.58686e-09	4.43632e-08
56270	WDR45B	WD repeat domain 45B	9.43188	9.49476	9.52085	8.77405	8.81614	8.8087	1.60533	0.682867	1.60533	up	3.925e-11	2.40312e-09
130827	TMEM182	transmembrane protein 182	5.0843	5.04478	5.05381	5.81051	5.85454	5.88797	-1.72913	-0.790043	1.72913	down	3.4092e-08	5.34525e-07
928	CD9	CD9 molecule	11.8349	11.8792	11.8843	12.4965	12.5284	12.5546	-1.58047	-0.660357	1.58047	down	9.85909e-14	3.10025e-11
9692	KIAA0391	KIAA0391	7.73882	7.65868	7.62786	8.58121	8.54465	8.63961	-1.88344	-0.91337	1.88344	down	1.74213e-11	1.31537e-09
79796	ALG9	ALG9, alpha-1,2-mannosyltransferase	5.68584	5.64625	5.87538	6.47172	6.57626	6.70956	-1.80253	-0.850023	1.80253	down	5.80269e-08	8.282e-07
10239	AP3S2	adaptor-related protein complex 3, sigma 2 subunit	7.30409	7.18582	7.2635	6.50991	6.43485	6.53957	1.68922	0.75636	1.68922	up	5.19755e-09	1.1484e-07
200933	FBXO45	F-box protein 45	5.10644	4.91128	4.68602	5.67392	5.82335	5.955	-1.88711	-0.916177	1.88711	down	5.05717e-07	5.05936e-06
7582	ZNF33B	zinc finger protein 33B	5.82264	5.86057	5.89794	5.31059	5.15917	5.25594	1.53526	0.618483	1.53526	up	1.04448e-06	9.31379e-06
23670	TMEM2	transmembrane protein 2	6.57892	6.41771	6.48424	7.14485	7.12978	7.1523	-1.56774	-0.648687	1.56774	down	4.45823e-08	6.69615e-07
92	ACVR2A	activin A receptor type IIA	5.96545	5.76515	5.51948	6.43742	6.37519	6.47427	-1.60096	-0.678933	1.60096	down	4.83717e-06	3.43638e-05
132320	SCLT1	sodium channel and clathrin linker 1	5.40594	5.34481	5.25066	6.10235	6.12976	5.97155	-1.66334	-0.734083	1.66334	down	1.78899e-07	2.12318e-06
400	ARL1	ADP ribosylation factor like GTPase 1	7.49763	7.47737	7.36057	8.46693	8.44694	8.45479	-2.01535	-1.01103	2.01535	down	6.4036e-12	6.32428e-10
151473	SLC16A14	solute carrier family 16 member 14	5.25797	5.20765	4.89171	5.73376	5.87298	5.73818	-1.58286	-0.66253	1.58286	down	7.97668e-06	5.27134e-05
4361	MRE11A	MRE11 homolog A, double strand break repair nuclease	5.9961	5.66188	5.76526	6.44509	6.419	6.50977	-1.56939	-0.650207	1.56939	down	1.92558e-06	1.56027e-05
55825	PECR	peroxisomal trans-2-enoyl-CoA reductase	6.87049	6.85016	6.75814	5.87511	5.85182	6.03782	1.87213	0.90468	1.87213	up	3.89151e-09	9.14854e-08
55869	HDAC8	histone deacetylase 8	5.61212	5.33558	5.66067	6.37998	6.42824	6.46788	-1.8522	-0.889243	1.8522	down	5.57286e-08	7.9917e-07
2745	GLRX	glutaredoxin	6.04991	5.84605	6.07799	5.10593	5.09075	5.10536	1.85399	0.890637	1.85399	up	2.5245e-08	4.19474e-07
3654	IRAK1	interleukin 1 receptor associated kinase 1	10.1819	10.0548	10.2439	9.24858	9.11332	9.23636	1.94638	0.960793	1.94638	up	9.38641e-12	8.27246e-10
25914	RTTN	rotatin	7.7319	7.77433	7.83573	8.47625	8.41957	8.54346	-1.6235	-0.699107	1.6235	down	8.72997e-10	2.76956e-08
55007	FAM118A	family with sequence similarity 118 member A	7.25687	7.11021	7.26858	6.30529	6.40788	6.57369	1.72063	0.782933	1.72063	up	4.58983e-08	6.85027e-07
4750	NEK1	NIMA-related kinase 1	5.98163	5.92488	6.1246	5.32563	5.39528	5.3027	1.59015	0.669167	1.59015	up	5.61849e-07	5.51684e-06
654320	SNORA8	small nucleolar RNA, H/ACA box 8	7.98464	7.88237	8.06656	7.2143	7.22288	7.2465	1.68175	0.749963	1.68175	up	1.68317e-09	4.65918e-08
55239	OGFOD1	2-oxoglutarate and iron-dependent oxygenase domain containing 1	8.55746	8.52488	8.67336	7.92059	8.06659	7.9547	1.52056	0.604607	1.52056	up	1.54885e-08	2.80297e-07
348938	NIPAL4	NIPA-like domain containing 4	7.36622	7.40494	7.32837	8.34818	8.23496	8.2301	-1.87199	-0.90457	1.87199	down	4.4109e-11	2.65512e-09
8452	CUL3	cullin 3	7.27808	7.22559	7.12698	7.80273	7.84224	7.80185	-1.52139	-0.60539	1.52139	down	2.14112e-08	3.66237e-07
16	AARS	alanyl-tRNA synthetase	9.56291	9.47172	9.52335	10.1268	10.085	10.114	-1.50446	-0.58925	1.50446	down	7.2525e-11	3.95387e-09
23195	MDN1	midasin AAA ATPase 1	8.98068	8.79384	8.87889	9.43928	9.46142	9.54118	-1.51168	-0.596157	1.51168	down	4.66286e-09	1.05223e-07
55839	CENPN	centromere protein N	7.66498	7.59357	7.52051	8.27467	8.2497	8.26714	-1.59197	-0.670817	1.59197	down	1.74433e-09	4.80052e-08
23092	ARHGAP26	Rho GTPase activating protein 26	6.58651	6.51051	6.65407	5.66465	5.81824	5.65207	1.83025	0.872043	1.83025	up	9.57473e-09	1.88743e-07
7637	ZNF84	zinc finger protein 84	7.26061	7.25217	7.16576	6.38697	6.34884	6.42274	1.79005	0.839997	1.79005	up	1.01592e-09	3.12123e-08
29968	PSAT1	phosphoserine aminotransferase 1	9.54572	9.40235	9.43065	10.1203	10.1122	10.1688	-1.59571	-0.6742	1.59571	down	7.69238e-11	4.14198e-09
6426	SRSF1	serine/arginine-rich splicing factor 1	8.32971	8.26406	8.28117	8.8904	8.91115	8.90213	-1.52581	-0.60958	1.52581	down	3.84189e-10	1.46331e-08
7368	UGT8	UDP glycosyltransferase 8	7.96159	8.06244	8.03674	8.84673	8.89475	8.85784	-1.79774	-0.846183	1.79774	down	1.29432e-11	1.06045e-09
131408	FAM131A	family with sequence similarity 131 member A	6.60119	6.63026	6.49171	7.19808	7.30352	7.40156	-1.65481	-0.726667	1.65481	down	2.89964e-08	4.69618e-07
25936	NSL1	NSL1, MIS12 kinetochore complex component	5.57861	5.72514	5.81812	6.57085	6.52815	6.51101	-1.77692	-0.82938	1.77692	down	2.33852e-08	3.93325e-07
6672	SP100	SP100 nuclear antigen	5.85035	5.765	5.85542	5.22188	5.10536	5.15282	1.584	0.66357	1.584	up	4.34086e-07	4.46198e-06
1847	DUSP5	dual specificity phosphatase 5	10.4773	10.4355	10.4875	11.3311	11.1996	11.3897	-1.79011	-0.84005	1.79011	down	3.9759e-12	4.51678e-10
283635	FAM177A1	family with sequence similarity 177 member A1	7.83313	7.89114	7.73888	8.59283	8.57145	8.59803	-1.701	-0.766387	1.701	down	1.91007e-10	8.42639e-09
11171	STRAP	serine/threonine kinase receptor associated protein	11.122	11.0183	11.2327	10.2813	10.3504	10.2744	1.76818	0.822267	1.76818	up	1.86345e-11	1.3732e-09
23370	ARHGEF18	Rho/Rac guanine nucleotide exchange factor 18	8.93976	8.95478	8.96342	8.26882	8.26456	8.41478	1.55466	0.6366	1.55466	up	1.46391e-09	4.17575e-08
55151	TMEM38B	transmembrane protein 38B	9.45651	9.33912	9.51415	7.6758	7.73914	7.785	3.2564	1.70328	3.2564	up	4.70694e-15	5.00042e-12
254394	MCM9	minichromosome maintenance 9 homologous recombination repair factor	4.47683	4.54788	4.57269	5.11009	5.24404	5.15825	-1.55652	-0.638327	1.55652	down	1.83316e-06	1.49742e-05
54542	RC3H2	ring finger and CCCH-type domains 2	7.42977	7.31449	7.42008	8.39781	8.40393	8.51431	-2.07135	-1.05057	2.07135	down	8.03363e-12	7.41262e-10
8863	PER3	period circadian clock 3	5.73592	5.63329	5.62869	6.2706	6.27011	6.40708	-1.56913	-0.649963	1.56913	down	3.546e-07	3.75268e-06
3673	ITGA2	integrin, alpha 2 (CD49B, alpha 2 subunit of VLA-2 receptor)	7.06416	6.97229	6.88362	5.99689	6.03733	6.19958	1.86016	0.895423	1.86016	up	6.53158e-09	1.38403e-07
5886	RAD23A	RAD23 homolog A, nucleotide excision repair protein	7.36562	7.23978	7.45805	6.66111	6.57232	6.58734	1.67895	0.74756	1.67895	up	1.52766e-08	2.76846e-07
79991	OBFC1	oligonucleotide/oligosaccharide-binding fold containing 1	7.08521	6.9178	6.94847	6.262	6.4541	6.47727	1.50112	0.586037	1.50112	up	1.29805e-06	1.12039e-05
8370	HIST2H4A	histone cluster 2, H4a	7.65274	7.62805	7.85564	8.86352	8.74792	8.82317	-2.14265	-1.09939	2.14265	down	2.04912e-11	1.48385e-09
51465	UBE2J1	ubiquitin conjugating enzyme E2, J1	6.69011	6.8582	6.80622	8.22661	8.29902	8.2515	-2.7783	-1.4742	2.7783	down	1.78475e-13	4.87718e-11
2908	NR3C1	nuclear receptor subfamily 3 group C member 1	7.23131	7.10269	7.33334	7.92508	7.81998	7.89817	-1.57858	-0.65863	1.57858	down	3.75903e-08	5.79647e-07
54625	PARP14	poly(ADP-ribose) polymerase family member 14	6.92567	6.8827	7.00605	7.55279	7.68966	7.67706	-1.62642	-0.701697	1.62642	down	9.22312e-09	1.82728e-07
150864	FAM117B	family with sequence similarity 117 member B	6.81702	6.73587	6.56318	7.49849	7.68343	7.65224	-1.87388	-0.90603	1.87388	down	4.30979e-09	9.90671e-08
27163	NAAA	N-acylethanolamine acid amidase	7.18763	7.11149	7.07553	6.2301	6.27151	6.20724	1.85138	0.8886	1.85138	up	6.76995e-10	2.2713e-08
10897	YIF1A	Yip1 interacting factor homolog A (S. cerevisiae)	8.87074	8.88564	8.91968	9.45429	9.4813	9.51501	-1.50683	-0.591513	1.50683	down	1.59959e-10	7.27719e-09
401152	C4orf3	chromosome 4 open reading frame 3	6.30811	5.91953	6.05958	6.94903	6.88971	6.85073	-1.74201	-0.80075	1.74201	down	2.05967e-07	2.38818e-06
84163	GTF2IRD2	GTF2I repeat domain containing 2	4.89526	4.57309	4.76839	5.22685	5.55296	5.26327	-1.51794	-0.602113	1.51794	down	5.44377e-05	0.000275284
5810	RAD1	RAD1 checkpoint DNA exonuclease	7.40939	7.14553	7.26889	8.14934	8.1513	8.10794	-1.81704	-0.86159	1.81704	down	1.11202e-09	3.37009e-08
10296	MAEA	macrophage erythroblast attacher	8.63138	8.59554	8.6632	7.60084	7.62108	7.58262	2.03994	1.02853	2.03994	up	1.05204e-12	1.68099e-10
1191	CLU	clusterin	7.76809	7.709	7.71484	8.43227	8.45458	8.70606	-1.7415	-0.800327	1.7415	down	4.19975e-09	9.71056e-08
55588	MED29	mediator complex subunit 29	8.53302	8.47844	8.57081	7.53466	7.5406	7.5211	1.9935	0.995303	1.9935	up	2.62714e-12	3.27825e-10
64762	GAREM1	GRB2 associated regulator of MAPK1 subtype 1	5.6347	5.68238	5.58969	6.32739	6.24754	6.44467	-1.62933	-0.704277	1.62933	down	1.63909e-07	1.97147e-06
5595	MAPK3	mitogen-activated protein kinase 3	6.50285	6.48416	6.67853	7.23929	7.30716	7.43281	-1.70674	-0.77124	1.70674	down	2.63697e-08	4.35448e-07
56929	FEM1C	fem-1 homolog c (C. elegans)	6.37901	6.28838	6.45029	7.26147	7.19348	7.24666	-1.81669	-0.86131	1.81669	down	1.34174e-09	3.91048e-08
91893	FDXACB1	ferredoxin-fold anticodon binding domain containing 1	5.45679	5.35073	5.49915	6.04275	6.21044	6.12418	-1.61354	-0.690233	1.61354	down	3.2555e-07	3.49342e-06
91754	NEK9	NIMA-related kinase 9	8.47676	8.34967	8.35553	7.75348	7.83397	7.83061	1.50313	0.587967	1.50313	up	1.08137e-08	2.08155e-07
1525	CXADR	coxsackie virus and adenovirus receptor	7.00498	6.9279	7.10445	6.33682	6.45578	6.4256	1.52243	0.606377	1.52243	up	2.61203e-07	2.90359e-06
56983	POGLUT1	protein O-glucosyltransferase 1	6.73845	6.86731	6.83544	7.51983	7.43535	7.52424	-1.60148	-0.679407	1.60148	down	1.20457e-08	2.26722e-07
1845	DUSP3	dual specificity phosphatase 3	8.05703	7.98634	8.1152	7.21814	7.0964	7.27624	1.80993	0.85593	1.80993	up	5.57167e-10	1.94499e-08
9076	CLDN1	claudin 1	9.61754	9.53396	9.63088	10.2723	10.2319	10.328	-1.6058	-0.683297	1.6058	down	2.60526e-11	1.77171e-09
5990	RFX2	regulatory factor X2	4.60621	4.82553	4.73914	5.42575	5.43142	5.55772	-1.67947	-0.748003	1.67947	down	4.68546e-07	4.75158e-06
7738	ZNF184	zinc finger protein 184	6.13963	6.21437	6.1645	6.77372	6.89182	6.84618	-1.58492	-0.664407	1.58492	down	5.20698e-08	7.57199e-07
9774	BCLAF1	BCL2-associated transcription factor 1	6.27044	6.1783	6.1453	6.73011	6.74299	6.90146	-1.50891	-0.593507	1.50891	down	6.20178e-07	6.01073e-06
54949	SDHAF2	succinate dehydrogenase complex assembly factor 2	9.01847	8.95991	9.02056	9.88436	9.89884	9.91896	-1.86745	-0.901073	1.86745	down	2.45466e-13	5.90245e-11
6515	SLC2A3	solute carrier family 2 (facilitated glucose transporter), member 3	4.52445	4.63517	4.33445	5.23473	5.12247	4.94795	-1.5196	-0.603693	1.5196	down	3.34195e-05	0.000180519
65991	FUNDC2	FUN14 domain containing 2	8.45426	8.38142	8.55497	7.18252	7.30514	7.23089	2.33599	1.22403	2.33599	up	2.08209e-12	2.74633e-10
3084	NRG1	neuregulin 1	8.60465	8.48627	8.51011	9.58322	9.44425	9.52291	-1.97673	-0.983117	1.97673	down	2.84582e-12	3.52503e-10
196394	AMN1	antagonist of mitotic exit network 1 homolog	7.30457	7.36516	7.31415	7.85959	7.9592	8.02333	-1.53625	-0.619413	1.53625	down	1.6209e-08	2.91192e-07
55744	COA1	cytochrome c oxidase assembly factor 1 homolog	8.14298	7.97817	7.96536	8.80897	8.84483	8.94794	-1.78808	-0.83841	1.78808	down	2.95838e-10	1.19512e-08
55149	MTPAP	mitochondrial poly(A) polymerase	5.28354	5.35346	5.26285	6.26206	6.23377	6.037	-1.83739	-0.87766	1.83739	down	2.53629e-08	4.21004e-07
27230	SERP1	stress-associated endoplasmic reticulum protein 1	9.55589	9.47673	9.53484	10.5972	10.597	10.6843	-2.14896	-1.10364	2.14896	down	1.64066e-14	9.083e-12
9145	SYNGR1	synaptogyrin 1	6.49505	6.28365	6.34479	7.84098	7.76339	7.85375	-2.7224	-1.44488	2.7224	down	1.55243e-12	2.22706e-10
81542	TMX1	thioredoxin-related transmembrane protein 1	7.69102	7.5847	7.62945	8.35271	8.40246	8.42824	-1.6928	-0.759413	1.6928	down	2.04912e-10	8.94943e-09
6810	STX4	syntaxin 4	7.41363	7.4339	7.4861	8.06021	8.17731	8.28506	-1.65824	-0.72965	1.65824	down	4.36953e-09	1.00265e-07
22931	RAB18	RAB18, member RAS oncogene family	5.65552	5.52626	5.73048	6.70016	6.77372	6.72789	-2.13836	-1.0965	2.13836	down	3.465e-10	1.34984e-08
6877	TAF5	TATA-box binding protein associated factor 5	6.97688	7.15569	7.12229	7.66702	7.71085	7.80161	-1.55999	-0.64154	1.55999	down	4.56459e-08	6.82206e-07
4155	MBP	myelin basic protein	8.13881	8.02296	8.02846	8.98503	9.00165	9.0477	-1.92926	-0.94805	1.92926	down	4.03487e-12	4.57056e-10
56935	SMCO4	single-pass membrane protein with coiled-coil domains 4	7.72844	7.70932	7.84723	8.81364	8.81219	8.75482	-2.0447	-1.03189	2.0447	down	3.17875e-12	3.85639e-10
64145	RBSN	rabenosyn, RAB effector	8.09598	7.97508	7.97229	8.70938	8.71821	8.74367	-1.63501	-0.709303	1.63501	down	3.10157e-10	1.23896e-08
80306	MED28	mediator complex subunit 28	7.53887	7.46831	7.51969	8.43787	8.56964	8.69189	-2.08134	-1.05751	2.08134	down	3.67024e-11	2.28631e-09
404636	FAM45A	family with sequence similarity 45 member A	6.40212	6.21462	6.45383	6.87553	7.11054	7.07417	-1.58362	-0.663223	1.58362	down	7.5269e-07	7.07122e-06
23019	CNOT1	CCR4-NOT transcription complex subunit 1	4.85406	4.70052	4.66481	5.39296	5.40705	5.74985	-1.71335	-0.776823	1.71335	down	2.24917e-06	1.78242e-05
1073	CFL2	cofilin 2 (muscle)	7.83794	7.7343	7.84603	9.21156	9.15593	9.2509	-2.63909	-1.40004	2.63909	down	2.31805e-14	1.08471e-11
518	ATP5G3	ATP synthase, H+ transporting, mitochondrial Fo complex subunit C3 (subunit 9)	4.90488	4.92527	4.9941	6.06794	6.03967	6.06263	-2.16645	-1.11533	2.16645	down	3.46199e-10	1.34984e-08
440145	MZT1	mitotic spindle organizing protein 1	9.24182	9.22813	8.89843	7.26747	7.04543	6.90267	4.14375	2.05094	4.14375	up	1.6031e-12	2.29138e-10
22841	RAB11FIP2	RAB11 family interacting protein 2 (class I)	4.76883	4.64654	4.71997	5.59751	5.63667	5.74649	-1.92979	-0.948443	1.92979	down	1.06395e-08	2.05406e-07
83607	AMMECR1L	AMMECR1 like	7.44839	7.20759	7.18331	7.81726	7.84701	8.03968	-1.53853	-0.621553	1.53853	down	8.09941e-07	7.51744e-06
1104	RCC1	regulator of chromosome condensation 1	9.18498	8.88765	9.31466	6.94424	7.21164	7.75083	3.54764	1.82686	3.54764	up	4.86884e-09	1.08738e-07
10424	PGRMC2	progesterone receptor membrane component 2	9.16763	9.04591	9.13532	9.78641	9.74554	9.8141	-1.58637	-0.66573	1.58637	down	8.76354e-11	4.62374e-09
4864	NPC1	Niemann-Pick disease, type C1	7.83924	7.80253	7.89332	8.67567	8.63024	8.80664	-1.81397	-0.859153	1.81397	down	1.0356e-10	5.25242e-09
5478	PPIA	peptidylprolyl isomerase A (cyclophilin A)	7.92063	7.79606	7.83202	8.58919	8.64724	8.53534	-1.67136	-0.74102	1.67136	down	3.92552e-10	1.48508e-08
11007	CCDC85B	coiled-coil domain containing 85B	8.68565	8.74953	8.76685	9.38802	9.46092	9.41822	-1.61147	-0.688377	1.61147	down	5.0984e-11	2.94558e-09
57597	BAHCC1	BAH domain and coiled-coil containing 1	6.99824	6.99824	6.90251	7.60239	7.63488	7.61949	-1.57199	-0.65259	1.57199	down	7.27228e-09	1.50197e-07
339745	SPOPL	speckle type POZ protein like	7.28827	7.21646	7.22283	6.69401	6.56939	6.43554	1.59793	0.676207	1.59793	up	1.06655e-07	1.36869e-06
147372	CCBE1	collagen and calcium binding EGF domains 1	6.56314	6.35218	6.54694	7.53631	7.40837	7.64468	-2.0596	-1.04237	2.0596	down	9.55006e-10	2.97924e-08
5771	PTPN2	protein tyrosine phosphatase, non-receptor type 2	5.57375	5.49688	5.47007	6.48113	6.29287	6.49951	-1.88027	-0.910937	1.88027	down	9.44925e-09	1.86738e-07
58528	RRAGD	Ras-related GTP binding D	7.24868	7.20712	7.18469	8.38456	8.31097	8.61903	-2.33705	-1.22469	2.33705	down	2.90862e-11	1.90866e-09
27252	KLHL20	kelch like family member 20	7.2375	7.08198	7.07489	6.04945	6.23353	6.41062	1.8664	0.900257	1.8664	up	3.69167e-08	5.71293e-07
146227	BEAN1	brain expressed, associated with NEDD4, 1	7.76591	7.8228	7.99406	6.98966	7.13702	7.14723	1.70482	0.76962	1.70482	up	1.25211e-08	2.34588e-07
92822	ZNF276	zinc finger protein 276	6.48057	6.54049	6.62147	5.71513	5.98296	6.04683	1.55029	0.632537	1.55029	up	3.26702e-06	2.46198e-05
8544	PIR	pirin	7.26475	7.05271	7.26001	6.3955	6.43612	6.48305	1.68677	0.754267	1.68677	up	2.51888e-08	4.19e-07
5986	RFNG	RFNG O-fucosylpeptide 3-beta-N-acetylglucosaminyltransferase	6.84611	6.8865	6.92895	6.20459	6.17918	6.449	1.52583	0.609597	1.52583	up	1.16582e-06	1.02219e-05
664701	ZNF826P	zinc finger protein 826, pseudogene	5.19157	4.70678	4.62505	6.27212	6.20895	6.10993	-2.55951	-1.35587	2.55951	down	1.66904e-08	2.97663e-07
1318	SLC31A2	solute carrier family 31 (copper transporter), member 2	7.34957	7.11176	7.2861	8.13386	8.11724	8.19145	-1.86396	-0.898373	1.86396	down	5.14554e-10	1.82849e-08
3151	HMGN2	high mobility group nucleosomal binding domain 2	6.93631	6.71356	6.68537	7.52424	7.50888	7.5902	-1.69666	-0.762693	1.69666	down	2.01885e-08	3.47743e-07
55972	SLC25A40	solute carrier family 25, member 40	8.41288	8.37772	8.36339	9.15335	9.14217	9.14403	-1.69567	-0.761853	1.69567	down	9.30381e-12	8.21809e-10
157567	ANKRD46	ankyrin repeat domain 46	6.41309	6.34294	6.32474	5.65591	5.6268	5.73478	1.61078	0.68776	1.61078	up	1.00259e-07	1.30407e-06
285527	FRYL	FRY like transcription coactivator	7.5257	7.39167	7.45276	8.31512	8.19866	8.36902	-1.78702	-0.837557	1.78702	down	4.24754e-10	1.58404e-08
9367	RAB9A	RAB9A, member RAS oncogene family	8.76684	8.67802	8.76772	7.93981	7.95513	8.21249	1.62644	0.701717	1.62644	up	2.33486e-08	3.93124e-07
84920	ALG10	ALG10, alpha-1,2-glucosyltransferase	5.22366	5.20236	5.18596	5.6919	5.94117	5.93806	-1.57249	-0.65305	1.57249	down	1.76901e-06	1.45469e-05
9831	ZNF623	zinc finger protein 623	6.48256	6.47897	6.46279	7.1722	7.03509	7.07863	-1.53744	-0.620533	1.53744	down	6.53354e-08	9.16211e-07
55504	TNFRSF19	tumor necrosis factor receptor superfamily member 19	5.01472	5.08373	5.17095	4.45854	4.44463	4.44441	1.55898	0.640607	1.55898	up	1.80856e-06	1.47979e-05
653659	TMEM183B	transmembrane protein 183B	8.7895	8.79167	8.91657	8.17413	8.11856	8.1883	1.59356	0.67225	1.59356	up	7.26478e-10	2.40368e-08
133746	JMY	junction mediating and regulatory protein, p53 cofactor	6.45885	6.3631	6.51039	7.15914	7.12673	7.06014	-1.59242	-0.671223	1.59242	down	3.88594e-08	5.97359e-07
116238	TLCD1	TLC domain containing 1	5.64199	5.28483	5.57409	6.0959	6.11074	6.11246	-1.5221	-0.606063	1.5221	down	8.6991e-06	5.68188e-05
7697	ZNF138	zinc finger protein 138	4.11712	3.65075	3.57699	4.26023	4.69317	4.50974	-1.63138	-0.706093	1.63138	down	0.000164519	0.000727576
8396	PIP4K2B	phosphatidylinositol-5-phosphate 4-kinase, type II, beta	7.55038	7.56812	7.50883	8.19205	8.16657	8.27293	-1.58895	-0.668073	1.58895	down	1.47519e-09	4.19788e-08
57561	ARRDC3	arrestin domain containing 3	6.2711	6.10398	6.01687	7.1844	7.13398	7.2089	-2.06352	-1.04511	2.06352	down	5.52886e-10	1.93218e-08
10681	GNB5	guanine nucleotide binding protein (G protein), beta 5	6.45647	6.47547	6.26217	7.04579	6.98524	7	-1.5287	-0.612307	1.5287	down	3.49654e-07	3.71155e-06
100526783	C15orf38-AP3S2	C15orf38-AP3S2 readthrough	7.30409	7.18582	7.2635	6.50991	6.43485	6.53957	1.68922	0.75636	1.68922	up	5.19755e-09	1.1484e-07
10138	YAF2	YY1 associated factor 2	5.59688	5.53655	5.58331	6.3381	6.32348	6.14131	-1.61931	-0.695383	1.61931	down	2.39573e-07	2.70289e-06
55871	CBWD1	COBW domain containing 1	7.26746	7.15656	7.11384	7.97395	7.91583	7.91311	-1.68764	-0.75501	1.68764	down	1.30499e-09	3.83131e-08
57678	GPAM	glycerol-3-phosphate acyltransferase, mitochondrial	5.10978	5.14032	4.97589	4.32911	4.28671	4.49573	1.62993	0.704813	1.62993	up	1.65713e-06	1.37623e-05
55917	CTTNBP2NL	CTTNBP2 N-terminal like	6.05725	5.82592	5.95359	6.7619	6.69293	6.91316	-1.7947	-0.843743	1.7947	down	3.55313e-08	5.52682e-07
34	ACADM	acyl-CoA dehydrogenase, C-4 to C-12 straight chain	6.74263	6.50558	6.91694	6.11185	6.2159	6.08009	1.50084	0.58577	1.50084	up	1.3501e-05	8.279e-05
84255	SLC37A3	solute carrier family 37, member 3	6.5118	6.44161	6.32983	7.16165	7.21858	7.28853	-1.73529	-0.795173	1.73529	down	7.23456e-09	1.49668e-07
81575	APOLD1	apolipoprotein L domain containing 1	4.64544	4.62203	4.35711	5.44027	5.65445	5.46546	-1.97046	-0.978533	1.97046	down	7.66297e-08	1.0426e-06
57003	CCDC47	coiled-coil domain containing 47	9.28359	9.24376	9.35591	8.67706	8.68062	8.69696	1.52577	0.60954	1.52577	up	3.46184e-10	1.34984e-08
148213	ZNF681	zinc finger protein 681	6.07305	5.95735	5.75737	4.99998	4.84514	4.73299	2.09927	1.06989	2.09927	up	2.2085e-08	3.76125e-07
201895	SMIM14	small integral membrane protein 14	4.70189	4.98775	4.80906	5.33552	5.66376	5.5335	-1.59995	-0.678027	1.59995	down	8.8628e-06	5.76676e-05
2764	GMFB	glia maturation factor, beta	8.74746	8.78355	8.75735	10.0016	9.93479	10.0382	-2.34364	-1.22875	2.34364	down	7.86041e-15	6.17938e-12
50617	ATP6V0A4	ATPase, H+ transporting, lysosomal V0 subunit a4	6.33624	6.28719	6.42897	5.22605	5.03167	5.19881	2.29521	1.19862	2.29521	up	3.61791e-10	1.39832e-08
2744	GLS	glutaminase	8.3782	8.37049	8.55633	7.59162	7.58637	7.69425	1.75434	0.810927	1.75434	up	8.40618e-10	2.69512e-08
23321	TRIM2	tripartite motif containing 2	5.87417	5.90486	5.8607	6.55602	6.50152	6.76932	-1.65754	-0.729043	1.65754	down	1.61656e-07	1.94688e-06
441520	CT45A4	cancer/testis antigen family 45, member A4	7.17178	7.35035	7.34255	6.59623	6.57423	6.45535	1.67747	0.74629	1.67747	up	2.21146e-08	3.76466e-07
130340	AP1S3	adaptor-related protein complex 1 sigma 3 subunit	5.43752	5.46577	5.71962	4.92056	4.86268	4.71305	1.63453	0.708873	1.63453	up	2.65872e-06	2.06412e-05
7037	TFRC	transferrin receptor	11.5731	11.507	11.4998	10.5981	10.6037	10.6109	1.89521	0.922357	1.89521	up	6.9465e-15	5.93614e-12
3797	KIF3C	kinesin family member 3C	5.34638	5.41563	5.27059	5.8886	5.97925	6.00442	-1.52967	-0.613223	1.52967	down	1.15815e-06	1.01615e-05
23516	SLC39A14	solute carrier family 39 (zinc transporter), member 14	10.673	10.5786	10.6707	11.2188	11.2564	11.3148	-1.53959	-0.622543	1.53959	down	2.29171e-11	1.62894e-09
50486	G0S2	G0/G1 switch 2	5.62995	5.0701	5.55376	6.12179	5.99555	6.15832	-1.59544	-0.67395	1.59544	down	5.22452e-05	0.000265392
51129	ANGPTL4	angiopoietin like 4	7.51799	7.43883	7.48269	8.10055	8.09606	8.3766	-1.6372	-0.711233	1.6372	down	4.36648e-08	6.57851e-07
80823	BHLHB9	basic helix-loop-helix domain containing, class B, 9	4.61072	4.57197	4.70625	4.1924	4.02678	3.71224	1.5719	0.652507	1.5719	up	4.68117e-05	0.00024141
4883	NPR3	natriuretic peptide receptor 3	5.81331	5.91082	5.92942	5.2927	5.37696	5.2002	1.51002	0.594563	1.51002	up	2.34497e-06	1.84754e-05
26060	APPL1	adaptor protein, phosphotyrosine interaction, PH domain and leucine zipper containing 1	8.61675	8.64907	8.65791	7.96174	7.97128	7.93146	1.60928	0.686417	1.60928	up	1.43115e-10	6.63374e-09
6383	SDC2	syndecan 2	7.61534	7.58987	7.73077	6.58696	6.56362	6.58128	2.09658	1.06804	2.09658	up	2.39881e-11	1.67776e-09
79000	AUNIP	aurora kinase A and ninein interacting protein	7.52331	7.28701	7.26344	8.18231	8.13205	8.28526	-1.79248	-0.841953	1.79248	down	4.80724e-09	1.07485e-07
1906	EDN1	endothelin 1	5.81812	5.66935	5.64094	4.82428	4.63857	5.03041	1.83831	0.878383	1.83831	up	3.80126e-07	3.98125e-06
10228	STX6	syntaxin 6	8.07231	7.95783	7.86959	8.80259	8.85841	8.78833	-1.80233	-0.849867	1.80233	down	1.30462e-10	6.22341e-09
55676	SLC30A6	solute carrier family 30 (zinc transporter), member 6	7.03007	6.92158	7.03751	7.65787	7.61779	7.68065	-1.5754	-0.655717	1.5754	down	9.24976e-09	1.83072e-07
28996	HIPK2	homeodomain interacting protein kinase 2	8.13116	7.87089	7.91825	7.1403	7.12921	7.25348	1.74002	0.799103	1.74002	up	8.73239e-09	1.7459e-07
4151	MB	myoglobin	6.64694	6.57116	6.5751	7.62755	7.63683	7.79821	-2.12844	-1.0898	2.12844	down	4.24647e-11	2.56399e-09
55388	MCM10	minichromosome maintenance 10 replication initiation factor	8.16675	7.98485	7.96401	8.88244	8.7916	8.70651	-1.68761	-0.75498	1.68761	down	3.35971e-09	8.11678e-08
2926	GRSF1	G-rich RNA sequence binding factor 1	4.97469	4.93628	4.9653	5.56169	5.63811	5.78073	-1.6261	-0.70142	1.6261	down	5.28311e-07	5.24451e-06
124808	CCDC43	coiled-coil domain containing 43	8.48664	8.48766	8.41617	7.79009	7.76667	7.9788	1.53507	0.618303	1.53507	up	2.69394e-08	4.42872e-07
118812	MORN4	MORN repeat containing 4	5.65019	5.57153	5.52838	6.21928	6.08337	6.3734	-1.56047	-0.641983	1.56047	down	1.81869e-06	1.48658e-05
8658	TNKS	tankyrase, TRF1-interacting ankyrin-related ADP-ribose polymerase	6.29939	6.45811	6.45966	5.53147	5.52851	5.41973	1.88228	0.912483	1.88228	up	6.7007e-09	1.40847e-07
10102	TSFM	Ts translation elongation factor, mitochondrial	5.47448	5.07485	5.35456	4.76172	4.58539	4.44814	1.62775	0.70288	1.62775	up	1.61979e-05	9.67029e-05
92703	TMEM183A	transmembrane protein 183A	8.7895	8.79167	8.91657	8.17413	8.11856	8.1883	1.59356	0.67225	1.59356	up	7.26478e-10	2.40368e-08
23142	DCUN1D4	DCN1, defective in cullin neddylation 1, domain containing 4	7.40544	7.2121	7.37745	6.69332	6.70322	6.64246	1.57134	0.651997	1.57134	up	6.13172e-08	8.68227e-07
10202	DHRS2	dehydrogenase/reductase (SDR family) member 2	4.67865	4.97711	4.2974	7.01427	6.7594	6.97186	-4.80362	-2.26412	4.80362	down	5.53539e-11	3.1671e-09
1373	CPS1	carbamoyl-phosphate synthase 1	6.1894	6.20105	6.21125	6.87376	6.9532	6.94675	-1.65176	-0.724003	1.65176	down	9.62841e-09	1.89706e-07
9880	ZBTB39	zinc finger and BTB domain containing 39	5.51579	5.49461	5.60741	6.04408	6.06378	6.32908	-1.52243	-0.606377	1.52243	down	5.13743e-06	3.62154e-05
6509	SLC1A4	solute carrier family 1 (glutamate/neutral amino acid transporter), member 4	6.35977	6.2923	6.33152	6.90562	7.04405	6.95297	-1.55799	-0.639683	1.55799	down	7.15185e-08	9.83961e-07
90141	EFCAB11	EF-hand calcium binding domain 11	4.89369	4.80224	4.89551	5.86635	5.85116	5.99136	-2.05501	-1.03914	2.05501	down	2.1498e-09	5.67128e-08
54726	OTUD4	OTU deubiquitinase 4	7.93125	7.89534	7.93151	8.60479	8.67942	8.68186	-1.66554	-0.73599	1.66554	down	9.19471e-11	4.78697e-09
55170	PRMT6	protein arginine methyltransferase 6	6.16908	6.09633	6.17769	7.62755	7.75665	7.71672	-2.93347	-1.55261	2.93347	down	2.30399e-13	5.66018e-11
55740	ENAH	enabled homolog (Drosophila)	5.91694	6.11727	5.76039	6.56753	6.74989	6.78559	-1.70464	-0.76947	1.70464	down	5.74791e-07	5.62723e-06
7251	TSG101	tumor susceptibility 101	8.67627	8.6041	8.71026	9.28234	9.33049	9.32758	-1.56909	-0.649927	1.56909	down	1.63962e-10	7.41641e-09
92610	TIFA	TRAF-interacting protein with forkhead-associated domain	5.34884	5.1976	5.15175	6.2389	6.39991	6.32275	-2.12548	-1.08779	2.12548	down	1.39496e-09	4.02879e-08
51479	ANKFY1	ankyrin repeat and FYVE domain containing 1	7.28586	7.20087	7.33446	8.02484	8.011	8.01434	-1.67365	-0.742997	1.67365	down	7.1432e-10	2.37143e-08
4015	LOX	lysyl oxidase	3.87071	3.55734	3.76206	5.46728	5.17302	5.30498	-3.0002	-1.58506	3.0002	down	3.32735e-10	1.31008e-08
51026	GOLT1B	golgi transport 1B	8.79497	8.70035	8.7345	10.227	10.2233	10.2323	-2.79768	-1.48423	2.79768	down	2.92977e-16	7.67736e-13
137392	FAM92A1	family with sequence similarity 92 member A1	8.41122	8.19582	8.39019	7.6282	7.78522	7.70785	1.54255	0.62532	1.54255	up	6.58339e-08	9.21886e-07
11078	TRIOBP	TRIO and F-actin binding protein	7.80898	7.72405	7.70519	6.82249	6.74615	6.93489	1.88108	0.911563	1.88108	up	4.2304e-10	1.57915e-08
389541	LAMTOR4	late endosomal/lysosomal adaptor, MAPK and MTOR activator 4	10.2279	10.2843	10.2508	9.10551	9.15268	9.03625	2.22868	1.15619	2.22868	up	1.74231e-14	9.30595e-12
4090	SMAD5	SMAD family member 5	6.86315	6.92521	6.8713	7.61299	7.67373	7.6361	-1.68691	-0.754387	1.68691	down	8.78668e-10	2.78306e-08
63920	ZBED8	zinc finger, BED-type containing 8	5.69059	5.39305	5.37335	6.03377	6.05954	6.22969	-1.53901	-0.622003	1.53901	down	9.96459e-06	6.37186e-05
7424	VEGFC	vascular endothelial growth factor C	7.94237	7.89419	7.98255	8.5643	8.60925	8.72158	-1.61553	-0.692007	1.61553	down	1.19581e-09	3.58259e-08
165324	UBXN2A	UBX domain protein 2A	7.30969	7.21477	7.31999	7.99488	7.93809	8.07347	-1.64794	-0.720663	1.64794	down	2.24248e-09	5.86851e-08
3148	HMGB2	high mobility group box 2	3.89497	3.91907	4.18436	4.61108	4.86574	4.82838	-1.70401	-0.768933	1.70401	down	3.24525e-06	2.44751e-05
347744	C6orf52	chromosome 6 open reading frame 52	6.27307	6.12792	5.9892	5.32409	5.37307	5.34479	1.7204	0.782747	1.7204	up	1.47623e-07	1.80143e-06
51028	VPS36	vacuolar protein sorting 36 homolog (S. cerevisiae)	6.11146	6.02399	6.20631	6.78124	6.7461	6.78688	-1.57733	-0.657487	1.57733	down	1.13162e-07	1.43857e-06
51330	TNFRSF12A	tumor necrosis factor receptor superfamily member 12A	9.83595	9.76025	9.84397	10.6585	10.6916	10.8186	-1.87841	-0.90951	1.87841	down	1.75069e-12	2.44892e-10
9712	USP6NL	USP6 N-terminal like	5.89387	5.63461	5.93895	6.32979	6.44239	6.53094	-1.52827	-0.611897	1.52827	down	5.8361e-06	4.02738e-05
1738	DLD	dihydrolipoamide dehydrogenase	6.97007	6.83862	6.70476	7.56192	7.31546	7.42071	-1.51035	-0.59488	1.51035	down	1.69823e-06	1.4059e-05
9055	PRC1	protein regulator of cytokinesis 1	8.86529	8.80512	8.98486	8.13806	8.21674	8.17231	1.63511	0.709387	1.63511	up	7.85856e-10	2.55497e-08
6840	SVIL	supervillin	7.89132	7.67266	7.61702	8.40506	8.21627	8.35969	-1.51572	-0.600007	1.51572	down	4.4559e-07	4.56471e-06
79026	AHNAK	AHNAK nucleoprotein	6.21736	6.30439	6.29457	7.16498	7.21639	7.04326	-1.82695	-0.869437	1.82695	down	2.06729e-09	5.49789e-08
3455	IFNAR2	interferon (alpha, beta and omega) receptor 2	6.61459	6.43092	6.6905	7.70141	7.59605	7.73278	-2.14069	-1.09808	2.14069	down	2.1959e-10	9.48506e-09
6526	SLC5A3	solute carrier family 5 (sodium/myo-inositol cotransporter), member 3	9.97983	10.0399	10.1095	9.27865	9.45238	9.4573	1.56589	0.646987	1.56589	up	1.82134e-09	4.95061e-08
51566	ARMCX3	armadillo repeat containing, X-linked 3	8.63088	8.62443	8.61009	7.94673	7.99054	7.90005	1.59773	0.676027	1.59773	up	2.78016e-10	1.13925e-08
8799	PEX11B	peroxisomal biogenesis factor 11 beta	7.89708	7.8437	7.73259	8.61479	8.64855	8.62745	-1.74812	-0.805807	1.74812	down	1.26561e-10	6.08156e-09
64689	GORASP1	golgi reassembly stacking protein 1	7.38053	7.12811	7.30937	6.23638	6.27151	6.35906	1.97751	0.983687	1.97751	up	1.37993e-09	3.99123e-08
27125	AFF4	AF4/FMR2 family member 4	9.8962	9.72857	9.86947	9.14695	9.17739	9.19374	1.57868	0.65872	1.57868	up	3.30934e-10	1.30603e-08
2887	GRB10	growth factor receptor bound protein 10	7.64519	7.51728	7.53378	6.41101	6.33114	6.32154	2.31475	1.21085	2.31475	up	7.96753e-12	7.40141e-10
285189	PLGLA	plasminogen-like A (pseudogene)	4.78322	4.61183	4.39605	4.09497	3.97231	3.90121	1.52366	0.607537	1.52366	up	5.02927e-05	0.000256701
4720	NDUFS2	NADH:ubiquinone oxidoreductase core subunit S2	10.1623	10.2015	10.3114	9.49093	9.54434	9.54482	1.6227	0.698393	1.6227	up	4.62603e-11	2.73026e-09
5796	PTPRK	protein tyrosine phosphatase, receptor type, K	4.41383	3.7549	4.19128	4.59983	4.71852	4.90006	-1.53631	-0.619467	1.53631	down	0.000515696	0.00197356
57512	GPR158	G protein-coupled receptor 158	5.32129	5.38835	5.47754	5.93099	5.89032	6.30447	-1.56504	-0.6462	1.56504	down	1.58857e-05	9.50842e-05
11346	SYNPO	synaptopodin	6.50052	6.23361	6.34303	7.33954	7.14743	7.27203	-1.85825	-0.893947	1.85825	down	9.73836e-09	1.91303e-07
10269	ZMPSTE24	zinc metallopeptidase STE24	9.45269	9.38265	9.36325	10.179	10.1947	10.2277	-1.74221	-0.80092	1.74221	down	1.22392e-12	1.86467e-10
56261	GPCPD1	glycerophosphocholine phosphodiesterase 1	6.2914	6.23251	6.32953	7.70278	7.37178	7.52828	-2.37808	-1.2498	2.37808	down	1.18668e-10	5.82335e-09
84056	KATNAL1	katanin p60 subunit A-like 1	7.87305	7.74323	7.84509	8.65136	8.62228	8.767	-1.81473	-0.859757	1.81473	down	1.08446e-10	5.41824e-09
10613	ERLIN1	ER lipid raft associated 1	9.44542	9.34526	9.37327	10.0051	9.99309	10.0295	-1.53819	-0.62123	1.53819	down	5.55991e-11	3.17651e-09
541466	CT45A1	cancer/testis antigen family 45, member A1	7.17178	7.35035	7.34255	6.59623	6.57423	6.45535	1.67747	0.74629	1.67747	up	2.21146e-08	3.76466e-07
57103	TIGAR	TP53 induced glycolysis regulatory phosphatase	7.21685	7.29847	7.04598	7.82285	7.77243	7.89902	-1.56302	-0.644333	1.56302	down	9.87691e-08	1.28596e-06
1728	NQO1	NAD(P)H dehydrogenase, quinone 1	10.57	10.4575	10.5192	11.2279	11.2644	11.2979	-1.6793	-0.74786	1.6793	down	1.1987e-12	1.84774e-10
1806	DPYD	dihydropyrimidine dehydrogenase	4.43182	4.17924	4.26943	4.88821	4.7865	5.27005	-1.61115	-0.68809	1.61115	down	4.16687e-05	0.00021847
253959	RALGAPA1	Ral GTPase activating protein, alpha subunit 1 (catalytic)	7.76675	7.47444	7.62936	8.18894	8.28276	8.29375	-1.54932	-0.631633	1.54932	down	1.21667e-07	1.52548e-06
9477	MED20	mediator complex subunit 20	8.14934	7.96393	8.02771	8.71743	8.77	8.73614	-1.61798	-0.694197	1.61798	down	1.2206e-09	3.63817e-08
23513	SCRIB	scribbled planar cell polarity protein	8.72025	8.73802	8.74446	8.06416	8.12543	8.22825	1.51043	0.594963	1.51043	up	4.61121e-09	1.04228e-07
102723631	CT45A10	cancer/testis antigen family 45, member A10	7.17178	7.35035	7.34255	6.59623	6.57423	6.45535	1.67747	0.74629	1.67747	up	2.21146e-08	3.76466e-07
138199	CARNMT1	carnosine N-methyltransferase 1	4.11939	3.80961	4.06682	5.10625	5.00221	5.04385	-2.07364	-1.05216	2.07364	down	2.76744e-08	4.51931e-07
23333	DPY19L1	dpy-19-like 1 (C. elegans)	7.91841	7.8958	8.05006	7.23367	7.28116	7.27382	1.61538	0.691873	1.61538	up	3.82086e-09	9.02565e-08
4524	MTHFR	methylenetetrahydrofolate reductase (NAD(P)H)	7.33381	7.30977	7.33444	6.50176	6.56824	6.79022	1.6312	0.705933	1.6312	up	9.60512e-08	1.2585e-06
338645	LUZP2	leucine zipper protein 2	6.27547	6.06776	6.2268	5.17434	5.35815	5.29465	1.88465	0.914297	1.88465	up	2.01765e-08	3.47689e-07
4091	SMAD6	SMAD family member 6	4.75388	4.98188	4.85871	5.25828	5.54018	5.64153	-1.53174	-0.615173	1.53174	down	3.1083e-05	0.000169527
26985	AP3M1	adaptor-related protein complex 3, mu 1 subunit	8.45611	8.36913	8.47977	7.46014	7.3693	7.28699	2.08907	1.06286	2.08907	up	1.20699e-11	1.00515e-09
24147	FJX1	four jointed box 1	9.72883	9.76003	9.74913	10.4501	10.3537	10.5113	-1.61593	-0.692367	1.61593	down	3.2693e-11	2.08614e-09
9759	HDAC4	histone deacetylase 4	5.19987	5.12068	5.31975	5.88329	5.94432	6.14773	-1.71516	-0.778347	1.71516	down	3.6767e-07	3.86368e-06
11328	FKBP9	FK506 binding protein 9	5.22644	4.82939	5.23857	5.77275	5.81385	5.99535	-1.69645	-0.762517	1.69645	down	4.87652e-06	3.46121e-05
7532	YWHAG	tyrosine 3-monooxygenase/tryptophan 5-monooxygenase activation protein, gamma	7.05181	6.87606	6.90043	7.7368	7.76125	7.75451	-1.75089	-0.808087	1.75089	down	1.1649e-09	3.50366e-08
85028	SNHG12	small nucleolar RNA host gene 12	6.33838	6.07404	6.49716	5.44946	5.31236	5.59299	1.80449	0.85159	1.80449	up	8.45713e-07	7.79425e-06
375743	PTAR1	protein prenyltransferase alpha subunit repeat containing 1	6.5118	6.18011	6.30535	7.02356	6.95315	6.97428	-1.57052	-0.651243	1.57052	down	7.84111e-07	7.3146e-06
51082	POLR1D	polymerase (RNA) I polypeptide D	7.00397	6.89117	6.9543	8.17629	8.25848	8.23295	-2.41623	-1.27276	2.41623	down	5.31682e-13	1.00509e-10
54107	POLE3	polymerase (DNA directed), epsilon 3, accessory subunit	9.29738	9.22937	9.32741	9.93976	9.85927	9.91787	-1.53785	-0.620913	1.53785	down	1.20243e-10	5.87858e-09
2673	GFPT1	glutamine--fructose-6-phosphate transaminase 1	7.49847	7.35382	7.45192	8.43429	8.40987	8.62845	-2.07935	-1.05613	2.07935	down	6.2524e-11	3.51593e-09
8507	ENC1	ectodermal-neural cortex 1 (with BTB domain)	9.53306	9.43242	9.43708	10.2901	10.1899	10.3319	-1.74489	-0.80314	1.74489	down	1.25531e-11	1.0366e-09
22868	FASTKD2	FAST kinase domains 2	7.44387	7.505	7.4545	8.06536	7.97968	8.13572	-1.50782	-0.592463	1.50782	down	1.92012e-08	3.33661e-07
27244	SESN1	sestrin 1	5.38158	5.46225	5.59091	6.09443	6.2235	6.14131	-1.59641	-0.674833	1.59641	down	5.13357e-07	5.12145e-06
56990	CDC42SE2	CDC42 small effector 2	8.20522	7.99149	8.16869	9.41943	9.3984	9.46001	-2.46938	-1.30415	2.46938	down	3.2693e-13	7.17912e-11
84893	FBXO18	F-box protein, helicase, 18	8.79129	8.81434	8.72845	8.02961	7.99852	8.06484	1.67834	0.747037	1.67834	up	7.15958e-11	3.93047e-09
112479	ERI2	ERI1 exoribonuclease family member 2	5.81883	5.70796	5.96353	6.47953	6.47931	6.61842	-1.61961	-0.695647	1.61961	down	3.9723e-07	4.13176e-06
728911	CT45A2	cancer/testis antigen family 45, member A2	7.17178	7.35035	7.34255	6.59623	6.57423	6.45535	1.67747	0.74629	1.67747	up	2.21146e-08	3.76466e-07
59345	GNB4	guanine nucleotide binding protein (G protein), beta polypeptide 4	4.52211	4.40352	4.43304	5.43543	5.16574	5.60464	-1.9306	-0.949047	1.9306	down	2.6225e-07	2.91359e-06
6613	SUMO2	small ubiquitin-like modifier 2	11.5082	11.4955	11.5733	12.4108	12.363	12.3267	-1.7915	-0.841167	1.7915	down	2.88009e-14	1.26646e-11
152137	CCDC50	coiled-coil domain containing 50	5.77924	5.91279	5.81874	6.99474	7.31064	7.18119	-2.50579	-1.32527	2.50579	down	1.02205e-10	5.19714e-09
7105	TSPAN6	tetraspanin 6	8.20354	8.19013	8.05417	7.60319	7.49048	7.50848	1.5318	0.61523	1.5318	up	1.98441e-08	3.42711e-07
54834	GDAP2	ganglioside induced differentiation associated protein 2	5.89824	5.44506	5.65274	6.42622	6.20564	6.42503	-1.60988	-0.68695	1.60988	down	1.00589e-05	6.42275e-05
7262	PHLDA2	pleckstrin homology-like domain, family A, member 2	9.09243	9.14777	9.19643	8.565	8.39327	8.60461	1.54177	0.624583	1.54177	up	9.54364e-09	1.88319e-07
6195	RPS6KA1	ribosomal protein S6 kinase, 90kDa, polypeptide 1	7.1471	7.17688	7.21381	7.88552	7.8392	7.89605	-1.61813	-0.694327	1.61813	down	1.30677e-09	3.83157e-08
2135	EXTL2	exostosin-like glycosyltransferase 2	8.3185	8.24603	8.24841	8.93611	8.85933	8.94398	-1.56066	-0.64216	1.56066	down	4.80018e-10	1.72943e-08
490	ATP2B1	ATPase, Ca++ transporting, plasma membrane 1	4.5384	4.27248	4.48732	4.91385	5.06293	5.09995	-1.50822	-0.592843	1.50822	down	2.07166e-05	0.000119681
977	CD151	CD151 molecule (Raph blood group)	8.29569	8.36678	8.40186	7.60043	7.6456	7.69409	1.63362	0.70807	1.63362	up	6.72812e-10	2.26036e-08
58526	MID1IP1	MID1 interacting protein 1	7.23781	7.1773	7.19029	8.09761	8.02824	8.06054	-1.81545	-0.86033	1.81545	down	5.61302e-11	3.20219e-09
144195	SLC2A14	solute carrier family 2 (facilitated glucose transporter), member 14	4.52445	4.63517	4.33445	5.23473	5.12247	4.94795	-1.5196	-0.603693	1.5196	down	3.34195e-05	0.000180519
2767	GNA11	guanine nucleotide binding protein (G protein), alpha 11 (Gq class)	8.57058	8.44966	8.51701	7.78619	7.90813	7.8354	1.59017	0.669177	1.59017	up	1.76622e-09	4.84133e-08
6652	SORD	sorbitol dehydrogenase	9.39888	9.33946	9.28651	8.73195	8.7657	8.73997	1.51125	0.595743	1.51125	up	4.43033e-10	1.63668e-08
51742	ARID4B	AT-rich interaction domain 4B	8.06591	7.89499	7.99012	8.73367	8.70677	8.77579	-1.68771	-0.75507	1.68771	down	3.22467e-10	1.27903e-08
27	ABL2	ABL proto-oncogene 2, non-receptor tyrosine kinase	9.50004	9.4711	9.45896	8.80322	8.74491	9.03252	1.53313	0.616483	1.53313	up	3.87839e-08	5.96431e-07
100302736	TMED7-TICAM2	TMED7-TICAM2 readthrough	6.20888	5.87797	5.97296	5.37871	5.17719	5.2904	1.66767	0.737837	1.66767	up	1.30702e-06	1.1264e-05
998	CDC42	cell division cycle 42	8.59517	8.45724	8.55501	7.9013	7.95236	7.88933	1.53845	0.621477	1.53845	up	3.11153e-09	7.68247e-08
2175	FANCA	Fanconi anemia complementation group A	6.32348	5.91207	6.34138	6.84676	6.85055	6.80849	-1.56153	-0.642957	1.56153	down	8.94077e-06	5.81078e-05
57088	PLSCR4	phospholipid scramblase 4	5.51402	5.25404	5.46225	6.51443	6.42491	6.51603	-2.10675	-1.07502	2.10675	down	1.90522e-09	5.13286e-08
26984	SEC22A	SEC22 homolog A, vesicle trafficking protein	5.82553	5.55177	6.00171	6.465	6.56235	6.59447	-1.679	-0.747603	1.679	down	1.80831e-06	1.47979e-05
5817	PVR	poliovirus receptor	8.21452	8.10723	8.29555	7.41012	7.41037	7.44093	1.72344	0.785293	1.72344	up	6.4245e-10	2.18639e-08
284942	RPL23AP82	ribosomal protein L23a pseudogene 82	8.2515	8.11766	8.34616	7.16227	7.37723	7.49244	1.85891	0.89446	1.85891	up	1.14066e-08	2.16913e-07
6713	SQLE	squalene epoxidase	8.32392	8.26406	8.27832	7.58432	7.50996	7.7145	1.60864	0.68584	1.60864	up	5.01812e-09	1.11376e-07
278	AMY1C	amylase, alpha 1C (salivary)	5.35526	5.34506	5.33899	3.75544	4.40974	4.33303	2.26634	1.18037	2.26634	up	3.96963e-07	4.13008e-06
6304	SATB1	SATB homeobox 1	5.61789	5.23442	5.41925	6.14578	6.00194	6.22727	-1.62579	-0.701143	1.62579	down	3.92228e-06	2.8694e-05
5997	RGS2	regulator of G-protein signaling 2	9.0616	8.93274	8.92171	8.34451	8.2523	8.38187	1.5646	0.64579	1.5646	up	2.6212e-09	6.66872e-08
25945	PVRL3	poliovirus receptor-related 3	7.29552	7.19131	7.26603	8.30489	8.41057	8.48467	-2.21774	-1.14909	2.21774	down	4.91042e-12	5.27361e-10
6289	SAA2	serum amyloid A2	6.8216	6.77546	7.03532	7.91992	7.73216	7.92613	-1.97512	-0.981943	1.97512	down	1.88862e-09	5.09862e-08
55571	CNOT11	CCR4-NOT transcription complex subunit 11	8.65488	8.63202	8.72271	7.79998	7.90139	7.76986	1.79767	0.846127	1.79767	up	5.67836e-11	3.23009e-09
65979	PHACTR4	phosphatase and actin regulator 4	8.40224	8.40093	8.32577	9.38784	9.38213	9.36195	-2.00138	-1.00099	2.00138	down	2.8147e-13	6.39419e-11
26272	FBXO4	F-box protein 4	7.63336	7.58734	7.48338	8.21431	8.34744	8.34927	-1.66514	-0.735647	1.66514	down	2.09562e-09	5.5582e-08
3308	HSPA4	heat shock protein family A (Hsp70) member 4	7.31366	7.3899	7.32004	7.93223	8.01914	8.0138	-1.56611	-0.64719	1.56611	down	3.87343e-09	9.11694e-08
3990	LIPC	lipase, hepatic	6.58696	6.75077	6.92913	4.66362	4.67393	4.81387	4.10812	2.03848	4.10812	up	1.41299e-12	2.05705e-10
283464	GXYLT1	glucoside xylosyltransferase 1	5.80621	5.79365	5.91297	6.94942	6.86235	6.94358	-2.11527	-1.08084	2.11527	down	1.39478e-10	6.53451e-09
6993	DYNLT1	dynein, light chain, Tctex-type 1	10.0523	10.0014	10.0701	11.1129	11.1067	11.2007	-2.1418	-1.09882	2.1418	down	6.70645e-15	5.93614e-12
64167	ERAP2	endoplasmic reticulum aminopeptidase 2	6.00966	5.98282	6.15137	6.46062	6.70329	6.73811	-1.50114	-0.586057	1.50114	down	4.73703e-06	3.37928e-05
64432	MRPS25	mitochondrial ribosomal protein S25	7.63851	7.72728	7.78428	6.88776	7.02736	6.92762	1.70422	0.76911	1.70422	up	2.94204e-09	7.34927e-08
79709	COLGALT1	collagen beta(1-O)galactosyltransferase 1	9.5427	9.46108	9.51764	10.2455	10.1991	10.33	-1.68299	-0.75103	1.68299	down	1.21773e-11	1.01005e-09
541465	CT45A6	cancer/testis antigen family 45, member A6	7.17178	7.35035	7.34255	6.59623	6.57423	6.45535	1.67747	0.74629	1.67747	up	2.21146e-08	3.76466e-07
130535	KCTD18	potassium channel tetramerization domain containing 18	6.39999	6.04628	6.19107	6.72037	6.80846	6.87044	-1.50244	-0.58731	1.50244	down	6.03588e-06	4.14777e-05
4124	MAN2A1	mannosidase, alpha, class 2A, member 1	8.14852	8.10646	8.12797	8.85994	8.69416	8.74668	-1.55755	-0.639277	1.55755	down	2.03548e-09	5.42432e-08
29982	NRBF2	nuclear receptor binding factor 2	6.4057	6.34231	6.35499	7.20335	7.25505	7.31906	-1.85509	-0.891487	1.85509	down	4.75986e-10	1.72439e-08
81579	PLA2G12A	phospholipase A2 group XIIA	7.14553	7.09367	7.09543	6.2007	6.58774	6.49182	1.60747	0.68479	1.60747	up	1.02317e-06	9.14457e-06
51111	KMT5B	lysine (K)-specific methyltransferase 5B	5.93774	5.88175	6.22192	5.32968	5.41739	5.26649	1.59765	0.67595	1.59765	up	3.48991e-06	2.6004e-05
200895	DHFRL1	dihydrofolate reductase like 1	4.01078	3.90984	3.82094	4.55974	4.72252	4.86019	-1.74146	-0.800297	1.74146	down	1.08779e-06	9.63661e-06
8726	EED	embryonic ectoderm development	4.73611	4.91879	4.60635	5.34307	5.65173	5.22118	-1.57088	-0.651577	1.57088	down	4.40198e-05	0.000229147
3035	HARS	histidyl-tRNA synthetase	8.93745	8.93128	8.95347	8.00856	8.13418	8.0236	1.84713	0.885287	1.84713	up	9.76349e-12	8.4965e-10
5286	PIK3C2A	phosphatidylinositol-4-phosphate 3-kinase catalytic subunit type 2 alpha	5.73707	5.70998	5.84245	6.33987	6.45537	6.50911	-1.59286	-0.671617	1.59286	down	2.52843e-07	2.82584e-06
8969	HIST1H2AG	histone cluster 1, H2ag	6.82976	6.71893	6.88237	7.64157	7.68594	7.74146	-1.83949	-0.879303	1.83949	down	4.81677e-10	1.73382e-08
3856	KRT8	keratin 8, type II	11.6741	11.6568	11.8623	10.8635	10.8566	10.7562	1.87335	0.905617	1.87335	up	9.22607e-12	8.19524e-10
3482	IGF2R	insulin like growth factor 2 receptor	8.15466	8.13596	8.14832	9.01487	9.04369	9.21872	-1.92668	-0.946113	1.92668	down	2.36166e-11	1.6572e-09
202018	TAPT1	transmembrane anterior posterior transformation 1	6.81213	6.56987	6.71673	7.81419	7.8918	7.76716	-2.18072	-1.12481	2.18072	down	7.22802e-11	3.95387e-09
139886	SPIN4	spindlin family member 4	8.66205	8.46768	8.391	9.05377	9.15141	9.22742	-1.5554	-0.63729	1.5554	down	6.06028e-08	8.60279e-07
2288	FKBP4	FK506 binding protein 4	5.76985	5.96315	5.74502	5.17766	5.14938	5.03973	1.62873	0.70375	1.62873	up	7.09134e-07	6.73771e-06
653510	CBWD4P	COBW domain containing 4 pseudogene	7.26746	7.15656	7.11384	7.97395	7.91583	7.91311	-1.68764	-0.75501	1.68764	down	1.30499e-09	3.83131e-08
80830	APOL6	apolipoprotein L, 6	5.05769	4.95909	5.16654	7.14494	6.56179	6.82838	-3.44363	-1.78393	3.44363	down	2.57119e-10	1.07289e-08
51473	DCDC2	doublecortin domain containing 2	7.99231	7.86952	8.07259	7.0521	7.14737	7.28273	1.76224	0.817407	1.76224	up	6.47904e-09	1.3766e-07
9270	ITGB1BP1	integrin beta 1 binding protein 1	7.94872	7.97287	8.07358	5.87253	6.09942	6.10909	3.92142	1.97138	3.92142	up	7.21796e-14	2.44547e-11
11137	PWP1	PWP1 homolog, endonuclein	7.58615	7.40984	7.52069	8.14425	8.10997	8.23267	-1.57651	-0.656737	1.57651	down	1.13768e-08	2.16452e-07
51144	HSD17B12	hydroxysteroid (17-beta) dehydrogenase 12	9.87697	9.67017	9.8546	9.1272	9.14546	9.16043	1.57594	0.656217	1.57594	up	1.36295e-09	3.95668e-08
56992	KIF15	kinesin family member 15	7.42699	7.37579	7.35637	8.0364	8.02002	8.01023	-1.55384	-0.635833	1.55384	down	2.31193e-09	6.00627e-08
7170	TPM3	tropomyosin 3	5.88323	5.84095	5.93147	6.79618	6.74135	6.80538	-1.86058	-0.895753	1.86058	down	1.21015e-09	3.61729e-08
2644	GCHFR	GTP cyclohydrolase I feedback regulator	9.17825	9.09285	9.25088	8.53024	8.58122	8.62327	1.51126	0.59575	1.51126	up	3.07618e-09	7.61912e-08
79602	ADIPOR2	adiponectin receptor 2	10.342	10.2787	10.3959	9.21574	9.24139	9.28648	2.13019	1.09098	2.13019	up	4.02333e-14	1.58145e-11
1983	EIF5	eukaryotic translation initiation factor 5	10.9085	10.8792	10.9139	10.2583	10.2407	10.3352	1.53955	0.622507	1.53955	up	9.76296e-12	8.4965e-10
9858	PPP1R26	protein phosphatase 1 regulatory subunit 26	7.22747	7.32523	7.37157	6.65295	6.73972	6.70455	1.52522	0.609017	1.52522	up	7.24567e-08	9.95127e-07
25895	METTL21B	methyltransferase like 21B	6.52582	6.45332	6.63841	7.22314	7.22371	7.23829	-1.61239	-0.689197	1.61239	down	2.42365e-08	4.05907e-07
894	CCND2	cyclin D2	3.93967	3.87587	3.74149	4.9024	4.95978	4.85841	-2.07703	-1.05452	2.07703	down	9.41018e-09	1.86059e-07
27250	PDCD4	programmed cell death 4 (neoplastic transformation inhibitor)	7.64126	7.49488	7.58278	8.63304	8.59916	8.68389	-2.09322	-1.06572	2.09322	down	3.34297e-12	3.98188e-10
7776	ZNF236	zinc finger protein 236	4.05122	3.96058	3.95598	4.77406	4.7247	4.95118	-1.77447	-0.827387	1.77447	down	2.73528e-07	3.01755e-06
1021	CDK6	cyclin-dependent kinase 6	8.36877	8.25422	8.27176	9.2929	9.25011	9.28123	-1.96768	-0.976497	1.96768	down	1.12439e-12	1.75382e-10
23548	TTC33	tetratricopeptide repeat domain 33	6.96625	7.05515	6.80714	6.13252	5.95152	6.00942	1.88125	0.911693	1.88125	up	9.03837e-09	1.79702e-07
259230	SGMS1	sphingomyelin synthase 1	8.06341	7.95577	8.14738	6.83344	6.92815	7.16191	2.11553	1.08102	2.11553	up	8.7264e-10	2.76956e-08
11240	PADI2	peptidyl arginine deiminase, type II	10.1086	9.94571	10.0262	9.26598	9.12501	9.21249	1.77237	0.825683	1.77237	up	3.35327e-11	2.1225e-09
55225	RAVER2	ribonucleoprotein, PTB-binding 2	6.33545	6.18448	6.3253	7.00831	7.11222	7.27025	-1.80065	-0.848517	1.80065	down	1.64613e-08	2.94379e-07
27341	RRP7A	ribosomal RNA processing 7 homolog A	6.87017	6.82764	6.94275	6.1758	6.18119	6.12263	1.64754	0.720313	1.64754	up	1.63958e-08	2.93475e-07
10928	RALBP1	ralA binding protein 1	9.09122	8.99421	9.02846	9.63871	9.71038	9.6822	-1.55739	-0.639133	1.55739	down	1.00681e-10	5.13958e-09
80224	NUBPL	nucleotide binding protein-like	8.23991	8.18953	8.1907	6.66996	6.74075	6.76564	2.79193	1.48126	2.79193	up	5.80219e-14	2.13146e-11
8355	HIST1H3G	histone cluster 1, H3g	6.43169	6.34098	6.47443	7.0315	7.02662	7.18578	-1.58623	-0.6656	1.58623	down	8.78771e-08	1.16735e-06
1824	DSC2	desmocollin 2	7.74722	7.62232	7.75822	8.40328	8.41104	8.55489	-1.67847	-0.74715	1.67847	down	1.64027e-09	4.55648e-08
7097	TLR2	toll-like receptor 2	5.5946	5.3421	5.42447	6.32732	6.35971	6.42995	-1.89028	-0.918603	1.89028	down	1.28923e-08	2.40512e-07
730087	ZNF726	zinc finger protein 726	6.2498	6.57884	6.08929	7.03505	6.9409	7.00956	-1.61238	-0.689193	1.61238	down	4.83959e-06	3.43748e-05
27283	TINAG	tubulointerstitial nephritis antigen	6.70261	6.76269	6.90191	6.04134	6.30813	6.20976	1.51851	0.60266	1.51851	up	2.33315e-06	1.83896e-05
80762	NDFIP1	Nedd4 family interacting protein 1	6.94297	6.85782	6.88821	7.52256	7.53593	7.61483	-1.58166	-0.66144	1.58166	down	8.81229e-09	1.7583e-07
9768	KIAA0101	KIAA0101	9.15377	9.02251	9.08739	9.99591	9.96725	9.97958	-1.85706	-0.893023	1.85706	down	9.76726e-13	1.59061e-10
996	CDC27	cell division cycle 27	8.89986	8.87093	8.82639	7.96103	7.9455	7.96023	1.87923	0.91014	1.87923	up	2.6237e-12	3.27825e-10
55226	NAT10	N-acetyltransferase 10 (GCN5-related)	8.49685	8.48638	8.57115	9.29247	9.31932	9.35351	-1.7455	-0.80364	1.7455	down	8.11121e-12	7.46669e-10
79885	HDAC11	histone deacetylase 11	7.04482	7.12501	7.04676	6.26553	6.28692	6.42104	1.67911	0.7477	1.67911	up	1.3396e-08	2.48377e-07
116150	NUS1	NUS1 dehydrodolichyl diphosphate synthase subunit	6.15888	5.91443	6.12217	7.06931	7.1195	7.05195	-2.02103	-1.01509	2.02103	down	1.00391e-09	3.09739e-08
100526842	RPL17-C18orf32	RPL17-C18orf32 readthrough	8.02066	8.01067	8.05255	9.59002	9.49389	9.56095	-2.86856	-1.52033	2.86856	down	1.28843e-15	1.80872e-12
5743	PTGS2	prostaglandin-endoperoxide synthase 2 (prostaglandin G/H synthase and cyclooxygenase)	4.61284	4.24438	4.24079	5.28039	5.16469	5.21411	-1.80716	-0.853727	1.80716	down	8.7125e-07	7.99585e-06
440	ASNS	asparagine synthetase (glutamine-hydrolyzing)	10.6294	10.4326	10.2922	11.0815	11.0224	11.0529	-1.51663	-0.600873	1.51663	down	5.62067e-08	8.04851e-07
7398	USP1	ubiquitin specific peptidase 1	10.1098	10.0406	10.1174	11.0385	11.0615	11.0464	-1.94462	-0.95949	1.94462	down	1.23825e-14	7.49859e-12
51569	UFM1	ubiquitin-fold modifier 1	5.78331	5.58254	5.72225	5.04294	5.02784	5.01925	1.58669	0.666023	1.58669	up	7.73346e-07	7.23416e-06
54680	ZNHIT6	zinc finger, HIT-type containing 6	9.95509	9.92808	9.92218	9.354	9.29062	9.3858	1.50696	0.591643	1.50696	up	1.02392e-10	5.19991e-09
1759	DNM1	dynamin 1	6.82976	6.67167	6.74165	6.01033	6.06381	6.12418	1.6039	0.681587	1.6039	up	8.45705e-08	1.12992e-06
6936	GCFC2	GC-rich sequence DNA-binding factor 2	6.53037	6.44185	6.42179	7.13477	7.14439	7.18079	-1.61177	-0.688647	1.61177	down	1.3547e-08	2.50467e-07
9811	CTIF	CBP80/20-dependent translation initiation factor	6.98626	7.03007	7.07786	6.43615	6.27151	6.46023	1.5606	0.6421	1.5606	up	1.45126e-07	1.77451e-06
84141	EVA1A	eva-1 homolog A (C. elegans)	7.77755	7.75312	7.8618	8.27264	8.49998	8.4363	-1.52149	-0.605483	1.52149	down	5.2401e-08	7.60745e-07
6167	RPL37	ribosomal protein L37	7.30331	7.23946	7.09845	7.77755	7.86059	7.78872	-1.5107	-0.595213	1.5107	down	8.69233e-08	1.15624e-06
10855	HPSE	heparanase	5.98943	5.81976	5.78715	6.62575	6.64269	6.57369	-1.68016	-0.748597	1.68016	down	5.40573e-08	7.80901e-07
55022	PID1	phosphotyrosine interaction domain containing 1	4.34494	4.17936	4.1491	4.89522	4.98622	5.27076	-1.77309	-0.826267	1.77309	down	1.47598e-06	1.24632e-05
8853	ASAP2	ArfGAP with SH3 domain, ankyrin repeat and PH domain 2	8.40949	8.25885	8.44928	9.18099	9.21614	9.27419	-1.80404	-0.851233	1.80404	down	7.79975e-11	4.18832e-09
148867	SLC30A7	solute carrier family 30 (zinc transporter), member 7	7.38275	7.25553	7.37512	8.33096	8.26681	8.38965	-1.98803	-0.99134	1.98803	down	2.35956e-11	1.6572e-09
729974	RFPL4AL1	ret finger protein-like 4A-like 1	4.10236	3.98005	3.94699	5.03392	4.46332	4.90766	-1.73127	-0.791833	1.73127	down	1.74262e-05	0.000102957
26017	FAM32A	family with sequence similarity 32 member A	9.08312	8.98443	9.0658	9.71753	9.75048	9.78192	-1.63074	-0.705527	1.63074	down	2.48805e-11	1.72788e-09
55322	C5orf22	chromosome 5 open reading frame 22	7.74008	7.57556	7.52943	8.22598	8.21796	8.16868	-1.50439	-0.589183	1.50439	down	5.12555e-08	7.46739e-07
23302	WSCD1	WSC domain containing 1	9.12101	9.11276	9.03957	8.11205	8.24358	8.24591	1.85395	0.8906	1.85395	up	1.66214e-11	1.26615e-09
25998	IBTK	inhibitor of Bruton tyrosine kinase	6.85357	6.7388	6.81924	7.48598	7.4375	7.62498	-1.6384	-0.712283	1.6384	down	1.67014e-08	2.97724e-07
6382	SDC1	syndecan 1	7.38097	7.41486	7.4517	6.68303	6.65706	6.84274	1.61131	0.688233	1.61131	up	2.45211e-08	4.09452e-07
25788	RAD54B	RAD54 homolog B (S. cerevisiae)	8.50297	8.44599	8.41883	9.05088	9.06875	9.07533	-1.52526	-0.609057	1.52526	down	3.46978e-10	1.35036e-08
51503	CWC15	CWC15 spliceosome-associated protein	4.50612	4.41075	4.51098	5.27004	5.16066	5.45031	-1.76262	-0.81772	1.76262	down	3.22852e-07	3.4692e-06
54492	NEURL1B	neuralized E3 ubiquitin protein ligase 1B	7.48054	7.37749	7.3503	6.90816	6.72624	6.81056	1.50294	0.58779	1.50294	up	2.1381e-07	2.46603e-06
51495	HACD3	3-hydroxyacyl-CoA dehydratase 3	10.9946	10.9919	10.9948	10.0267	10.1169	10.1057	1.87992	0.910673	1.87992	up	3.85068e-14	1.56279e-11
6653	SORL1	sortilin-related receptor, L(DLR class) A repeats containing	7.12549	6.94392	7.03696	8.06721	7.95884	8.13923	-2.02741	-1.01964	2.02741	down	1.16432e-10	5.74226e-09
7474	WNT5A	wingless-type MMTV integration site family member 5A	5.12608	5.08409	5.20427	5.95085	5.85832	5.86425	-1.68529	-0.752993	1.68529	down	9.04282e-08	1.19558e-06
51117	COQ4	coenzyme Q4	8.2659	8.15924	8.17745	6.98892	7.03044	7.0556	2.2593	1.17588	2.2593	up	1.31666e-12	1.96815e-10
10428	CFDP1	craniofacial development protein 1	6.11562	6.13175	6.21225	6.78211	6.5953	7.21262	-1.63596	-0.710137	1.63596	down	2.18151e-05	0.00012518
5412	UBL3	ubiquitin like 3	5.71067	5.66706	5.26455	6.31251	6.40601	6.604	-1.85757	-0.893413	1.85757	down	9.98809e-07	8.94717e-06
64426	SUDS3	SDS3 homolog, SIN3A corepressor complex component	6.17802	5.75413	5.96685	6.66748	6.70642	6.55846	-1.59968	-0.677787	1.59968	down	3.61917e-06	2.68355e-05
55323	LARP6	La ribonucleoprotein domain family member 6	7.07809	7.01879	6.98077	6.28302	6.43314	6.46056	1.55148	0.633643	1.55148	up	1.49018e-07	1.81401e-06
3604	TNFRSF9	tumor necrosis factor receptor superfamily member 9	4.15171	4.21044	4.12866	5.058	5.02383	5.39845	-1.99514	-0.99649	1.99514	down	1.14661e-07	1.45339e-06
80010	RMI1	RecQ mediated genome instability 1	7.43195	7.28098	7.19636	7.91938	7.93124	7.84885	-1.51228	-0.596727	1.51228	down	1.191e-07	1.49903e-06
59338	PLEKHA1	pleckstrin homology domain containing A1	7.30532	7.20407	7.22965	7.944	7.97944	8.04836	-1.67511	-0.744253	1.67511	down	9.24359e-10	2.90438e-08
54880	BCOR	BCL6 corepressor	6.77541	6.57931	6.47689	7.34378	7.34358	7.43896	-1.69926	-0.764903	1.69926	down	4.70041e-08	6.9694e-07
5366	PMAIP1	phorbol-12-myristate-13-acetate-induced protein 1	8.73436	8.65743	8.73874	9.68979	9.77381	9.86796	-2.09509	-1.06701	2.09509	down	9.46273e-13	1.56282e-10
4831	NME2	NME/NM23 nucleoside diphosphate kinase 2	11.5575	11.5298	11.5504	12.5831	12.612	12.6793	-2.11244	-1.07891	2.11244	down	3.22771e-16	7.92947e-13
7643	ZNF90	zinc finger protein 90	6.14384	5.97986	6.13975	6.73361	6.65654	6.69236	-1.52241	-0.606353	1.52241	down	4.07252e-07	4.21926e-06
8351	HIST1H3D	histone cluster 1, H3d	7.53795	7.62875	7.88469	8.24265	8.26566	8.48427	-1.56598	-0.647063	1.56598	down	1.23445e-06	1.0743e-05
353091	RAET1G	retinoic acid early transcript 1G	5.84346	5.95709	5.95998	6.65258	6.44993	6.44631	-1.51162	-0.596097	1.51162	down	1.5788e-06	1.3201e-05
205428	C3orf58	chromosome 3 open reading frame 58	4.99356	4.7017	4.64142	5.61375	5.49279	5.68593	-1.76369	-0.818597	1.76369	down	8.35939e-07	7.72772e-06
27113	BBC3	BCL2 binding component 3	7.82878	7.764	7.82586	8.83437	8.8017	8.98587	-2.09619	-1.06777	2.09619	down	5.17992e-12	5.44696e-10
10799	RPP40	ribonuclease P/MRP 40kDa subunit	8.75323	8.63109	8.68323	7.86696	7.92562	7.9651	1.70522	0.769957	1.70522	up	1.4916e-10	6.86538e-09
55638	SYBU	syntabulin (syntaxin-interacting)	7.06728	7.19832	7.20504	7.82195	7.85835	7.85205	-1.6102	-0.687237	1.6102	down	4.18349e-09	9.68436e-08
5441	POLR2L	polymerase (RNA) II (DNA directed) polypeptide L, 7.6kDa	11.7603	11.7821	11.8488	11.2202	11.2055	11.2012	1.50329	0.58812	1.50329	up	2.89831e-12	3.57128e-10
128	ADH5	alcohol dehydrogenase 5 (class III), chi polypeptide	6.47633	6.53954	6.43412	7.55701	7.62261	7.44157	-2.0807	-1.05707	2.0807	down	8.83999e-11	4.64319e-09
3052	HCCS	holocytochrome c synthase	7.83315	7.72247	7.74899	6.31256	6.48024	6.30311	2.64433	1.4029	2.64433	up	2.15314e-12	2.82601e-10
653082	ZDHHC11B	zinc finger, DHHC-type containing 11B	4.8493	4.76019	4.90988	3.20243	3.76668	4.03219	2.25432	1.17269	2.25432	up	2.34618e-06	1.84812e-05
63939	FAM217B	family with sequence similarity 217 member B	7.68045	7.55551	7.64191	8.48148	8.45698	8.23473	-1.6995	-0.765107	1.6995	down	6.98468e-09	1.45482e-07
80328	ULBP2	UL16 binding protein 2	5.84346	5.95709	5.95998	6.65258	6.44993	6.44631	-1.51162	-0.596097	1.51162	down	1.5788e-06	1.3201e-05
91408	BTF3L4	basic transcription factor 3-like 4	8.97179	8.82407	8.90012	6.48025	6.4374	6.41794	5.47729	2.45346	5.47729	up	5.54639e-17	3.11446e-13
64750	SMURF2	SMAD specific E3 ubiquitin protein ligase 2	9.7821	9.68491	9.83652	8.93636	8.83901	8.91569	1.82871	0.870823	1.82871	up	8.76498e-12	7.88387e-10
23186	RCOR1	REST corepressor 1	8.08929	7.94402	8.02568	8.66753	8.70487	8.69582	-1.59079	-0.669743	1.59079	down	7.73113e-10	2.52148e-08
1666	DECR1	2,4-dienoyl-CoA reductase 1, mitochondrial	9.52913	9.43361	9.48492	8.56539	8.63268	8.59733	1.8456	0.884087	1.8456	up	1.89681e-12	2.57097e-10
9444	QKI	QKI, KH domain containing, RNA binding	6.88225	6.93288	6.77003	5.75793	5.91348	5.93166	1.99174	0.99403	1.99174	up	1.46267e-09	4.17524e-08
10081	PDCD7	programmed cell death 7	6.74991	6.77385	6.85262	5.84201	5.81852	5.88487	1.9234	0.94366	1.9234	up	6.92262e-10	2.31384e-08
3624	INHBA	inhibin beta A	8.12708	8.04142	7.94882	7.28215	7.34474	7.55843	1.56266	0.644	1.56266	up	2.12503e-07	2.45367e-06
55765	C1orf106	chromosome 1 open reading frame 106	6.7803	6.84094	6.69951	7.45002	7.48651	7.41858	-1.60005	-0.67812	1.60005	down	1.17479e-08	2.22167e-07
11030	RBPMS	RNA binding protein with multiple splicing	8.26326	8.32206	8.3351	7.45823	7.45627	7.4837	1.79097	0.84074	1.79097	up	3.3833e-11	2.13463e-09
25898	RCHY1	ring finger and CHY zinc finger domain containing 1, E3 ubiquitin protein ligase	8.15279	7.98609	8.07163	7.28116	7.25032	7.22274	1.76389	0.818763	1.76389	up	3.72796e-10	1.42961e-08
114088	TRIM9	tripartite motif containing 9	5.84615	5.80713	5.84032	6.48243	6.43847	6.6434	-1.61354	-0.690233	1.61354	down	1.51675e-07	1.84066e-06
441027	TMEM150C	transmembrane protein 150C	6.00942	5.93024	5.85161	5.25417	5.36655	5.26346	1.55369	0.635697	1.55369	up	8.89396e-07	8.13768e-06
57679	ALS2	ALS2, alsin Rho guanine nucleotide exchange factor	6.83504	6.72889	6.60614	7.48143	7.25032	7.32057	-1.5448	-0.627417	1.5448	down	5.85771e-07	5.72616e-06
6996	TDG	thymine DNA glycosylase	5.79232	5.65156	5.93434	6.56375	6.39544	6.40176	-1.58108	-0.66091	1.58108	down	1.34083e-06	1.14854e-05
27010	TPK1	thiamin pyrophosphokinase 1	5.54601	5.64127	5.45147	4.94292	4.90057	4.74044	1.60764	0.68494	1.60764	up	1.44764e-06	1.2274e-05
352999	C6orf58	chromosome 6 open reading frame 58	4.75388	4.64032	4.5803	5.40918	5.49461	5.36806	-1.70029	-0.765783	1.70029	down	2.38527e-07	2.69574e-06
1967	EIF2B1	eukaryotic translation initiation factor 2B subunit alpha	8.77645	8.63081	8.73208	8.08762	8.16286	8.08349	1.5176	0.60179	1.5176	up	4.77877e-09	1.06938e-07
11316	COPE	coatomer protein complex subunit epsilon	8.89807	9.01367	9.14044	8.37424	8.38692	8.41424	1.54285	0.625593	1.54285	up	1.05285e-08	2.03965e-07
6491	STIL	SCL/TAL1 interrupting locus	7.70732	7.63616	7.71708	8.24776	8.25396	8.31962	-1.50204	-0.586927	1.50204	down	5.70686e-09	1.23933e-07
23306	NEMP1	nuclear envelope integral membrane protein 1	5.04809	4.85638	4.91998	5.96459	5.99297	6.08108	-2.10147	-1.0714	2.10147	down	1.89851e-09	5.11829e-08
6520	SLC3A2	solute carrier family 3 (amino acid transporter heavy chain), member 2	10.3136	10.1592	10.1166	10.9403	10.8482	10.9492	-1.64277	-0.71613	1.64277	down	1.72858e-10	7.7693e-09
91624	NEXN	nexilin (F actin binding protein)	5.21806	5.34035	5.28918	4.37362	4.46132	4.4638	1.80202	0.849617	1.80202	up	5.14604e-08	7.49446e-07
819	CAMLG	calcium modulating ligand	9.32357	9.25652	9.24139	7.83574	7.88342	7.89233	2.64511	1.40333	2.64511	up	6.50267e-15	5.93614e-12
80212	CCDC92	coiled-coil domain containing 92	6.27151	6.30084	6.53089	4.80891	5.24275	4.93701	2.58744	1.37152	2.58744	up	2.99848e-09	7.45958e-08
91272	BOD1	biorientation of chromosomes in cell division 1	10.3834	10.3286	10.4635	9.60846	9.71904	9.74309	1.62633	0.70162	1.62633	up	9.98859e-11	5.11663e-09
220	ALDH1A3	aldehyde dehydrogenase 1 family member A3	8.41191	8.23336	8.29309	7.6022	7.6625	7.71974	1.57059	0.651307	1.57059	up	9.23657e-09	1.82903e-07
123	PLIN2	perilipin 2	7.64066	7.64593	7.72396	8.31327	8.32891	8.51522	-1.64219	-0.715617	1.64219	down	4.50439e-09	1.02759e-07
23582	CCNDBP1	cyclin D-type binding-protein 1	8.42492	8.4553	8.39608	8.99204	8.98925	9.08261	-1.51138	-0.595867	1.51138	down	9.35069e-10	2.92401e-08
5865	RAB3B	RAB3B, member RAS oncogene family	6.65328	6.39306	6.61532	5.62774	5.84289	6.01166	1.65457	0.726457	1.65457	up	2.59067e-06	2.01846e-05
57724	EPG5	ectopic P-granules autophagy protein 5 homolog (C. elegans)	7.85269	7.69605	7.71398	8.5809	8.41911	8.66038	-1.74016	-0.799223	1.74016	down	3.20068e-09	7.83858e-08
160418	TMTC3	transmembrane and tetratricopeptide repeat containing 3	7.88556	7.71556	7.80522	6.64307	6.60787	6.75304	2.19485	1.13412	2.19485	up	2.76919e-11	1.84802e-09
222234	FAM185A	family with sequence similarity 185 member A	5.01242	4.60825	4.97202	5.35151	5.48999	5.51762	-1.50401	-0.58881	1.50401	down	6.13679e-05	0.000306271
8723	SNX4	sorting nexin 4	8.11746	7.97658	8.18017	7.21926	7.26826	7.30877	1.77273	0.825973	1.77273	up	8.5804e-10	2.7275e-08
7039	TGFA	transforming growth factor alpha	8.9384	8.89654	8.90431	7.99887	8.07008	7.95861	1.87111	0.903897	1.87111	up	5.48973e-12	5.67855e-10
51367	POP5	POP5 homolog, ribonuclease P/MRP subunit	8.98164	8.88338	8.90762	8.28131	8.34278	8.27132	1.54301	0.625743	1.54301	up	7.05648e-10	2.35058e-08
348487	FAM131C	family with sequence similarity 131 member C	6.21215	6.12734	6.3255	5.62652	5.54338	5.61682	1.54338	0.62609	1.54338	up	7.91107e-07	7.36349e-06
636	BICD1	bicaudal D homolog 1 (Drosophila)	6.79544	6.50664	6.61833	5.74603	5.88033	6.01323	1.69381	0.760273	1.69381	up	4.45011e-07	4.56354e-06
5049	PAFAH1B2	platelet activating factor acetylhydrolase 1b catalytic subunit 2	8.50469	8.39287	8.56682	9.43855	9.45285	9.53357	-1.98187	-0.986863	1.98187	down	4.63934e-12	5.07962e-10
51203	NUSAP1	nucleolar and spindle associated protein 1	8.65361	8.64943	8.61569	9.2012	9.31643	9.26379	-1.53783	-0.620897	1.53783	down	3.41966e-10	1.33881e-08
51123	ZNF706	zinc finger protein 706	5.51376	5.31293	5.02846	6.49264	6.56099	6.60367	-2.40725	-1.26738	2.40725	down	4.53004e-09	1.03165e-07
81555	YIPF5	Yip1 domain family member 5	8.92137	8.47493	8.82841	8.15141	8.07173	8.16793	1.52754	0.611213	1.52754	up	3.46995e-06	2.58713e-05
10162	LPCAT3	lysophosphatidylcholine acyltransferase 3	8.96	8.97488	9.11169	8.38839	8.48393	8.26354	1.55499	0.636903	1.55499	up	1.87817e-08	3.27821e-07
57542	KLHL42	kelch like family member 42	7.09371	7.09367	6.97444	8.34188	8.2502	8.28138	-2.35743	-1.23721	2.35743	down	1.00056e-12	1.61185e-10
167227	DCP2	decapping mRNA 2	7.98536	8.00875	8.01837	8.6988	8.73415	8.70861	-1.63546	-0.709693	1.63546	down	6.99096e-11	3.85946e-09
23327	NEDD4L	neural precursor cell expressed, developmentally down-regulated 4-like, E3 ubiquitin protein ligase	8.69782	8.60914	8.75318	8.08589	7.97882	8.22705	1.50468	0.58946	1.50468	up	9.45645e-08	1.243e-06
51315	KRCC1	lysine-rich coiled-coil 1	4.59907	4.49568	4.75573	3.77917	3.80816	3.9181	1.71914	0.781683	1.71914	up	9.14647e-07	8.31734e-06
55662	HIF1AN	hypoxia inducible factor 1, alpha subunit inhibitor	6.00773	5.92777	5.95925	6.79128	6.69414	6.70443	-1.69941	-0.765033	1.69941	down	1.12366e-08	2.14823e-07
79866	BORA	bora, aurora kinase A activator	6.86879	6.84815	6.83924	7.721	7.80017	7.63013	-1.82139	-0.86504	1.82139	down	3.87686e-10	1.47187e-08
79989	TTC26	tetratricopeptide repeat domain 26	6.15049	6.00781	6.07458	5.16372	5.08347	5.34915	1.8389	0.878847	1.8389	up	5.01194e-08	7.32358e-07
79837	PIP4K2C	phosphatidylinositol-5-phosphate 4-kinase, type II, gamma	8.38467	8.34542	8.3909	9.2152	9.18285	9.34934	-1.8346	-0.875467	1.8346	down	1.82482e-11	1.35592e-09
79230	ZNF557	zinc finger protein 557	5.14974	4.94083	5.17297	4.51159	4.457	4.51575	1.50845	0.593067	1.50845	up	9.48358e-06	6.11e-05
80209	PROSER1	proline and serine rich 1	7.33676	7.16652	7.25035	8.13752	8.14423	8.26189	-1.90528	-0.930003	1.90528	down	1.39432e-10	6.53451e-09
8165	AKAP1	A-kinase anchoring protein 1	8.19544	8.27931	8.31748	7.39053	7.38386	7.35062	1.85199	0.889073	1.85199	up	3.79526e-11	2.3456e-09
3556	IL1RAP	interleukin 1 receptor accessory protein	5.63803	5.42456	5.36869	6.39657	6.49894	6.80569	-2.1287	-1.08997	2.1287	down	3.4586e-08	5.40659e-07
51441	YTHDF2	YTH N(6)-methyladenosine RNA binding protein 2	9.63466	9.54295	9.57513	8.60912	8.63954	8.60411	1.95431	0.966657	1.95431	up	3.29483e-13	7.195e-11
6945	MLX	MLX, MAX dimerization protein	9.15528	9.06625	9.12521	8.31124	8.37159	8.36815	1.69967	0.765253	1.69967	up	2.53375e-11	1.74116e-09
10276	NET1	neuroepithelial cell transforming 1	7.54269	7.47593	7.53464	8.20224	8.24652	8.25213	-1.64248	-0.715877	1.64248	down	3.48849e-10	1.355e-08
105376843	SNHG25	small nucleolar RNA host gene 25	5.46216	5.63471	5.79924	4.80525	4.94158	4.73555	1.74663	0.804577	1.74663	up	7.1595e-07	6.79099e-06
647087	C7orf73	chromosome 7 open reading frame 73	5.86967	5.86863	5.69465	7.18573	7.18573	7.2502	-2.63214	-1.39624	2.63214	down	5.95102e-12	6.00024e-10
159090	FAM122B	family with sequence similarity 122B	8.28297	8.18614	8.27902	8.80982	8.9037	8.80332	-1.5048	-0.58957	1.5048	down	3.33387e-09	8.06426e-08
9908	G3BP2	GTPase activating protein (SH3 domain) binding protein 2	8.3898	8.22955	8.30412	8.84596	8.90094	8.97405	-1.51483	-0.59916	1.51483	down	7.65284e-09	1.56427e-07
55298	RNF121	ring finger protein 121	5.98031	5.85756	5.95612	6.72132	6.91329	7.1471	-1.99433	-0.995907	1.99433	down	2.63668e-08	4.35448e-07
5292	PIM1	Pim-1 proto-oncogene, serine/threonine kinase	5.45675	5.40343	5.73956	6.85765	6.78827	7.04439	-2.57313	-1.36352	2.57313	down	5.51564e-10	1.93218e-08
101060211	CT45A7	cancer/testis antigen family 45, member A7	7.17178	7.35035	7.34255	6.59623	6.57423	6.45535	1.67747	0.74629	1.67747	up	2.21146e-08	3.76466e-07
1974	EIF4A2	eukaryotic translation initiation factor 4A2	7.20244	6.90191	7.31652	6.45843	6.57107	6.46601	1.56026	0.641787	1.56026	up	3.77731e-06	2.78355e-05
7181	NR2C1	nuclear receptor subfamily 2 group C member 1	6.28791	6.17346	6.1662	6.78841	6.73991	6.91458	-1.52109	-0.60511	1.52109	down	4.47635e-07	4.58089e-06
9289	ADGRG1	adhesion G protein-coupled receptor G1	8.64762	8.67102	8.69326	9.19271	9.29948	9.32128	-1.51627	-0.600523	1.51627	down	8.7556e-10	2.77546e-08
10558	SPTLC1	serine palmitoyltransferase, long chain base subunit 1	8.78481	8.81013	8.81291	8.17232	8.18628	8.17441	1.54215	0.624947	1.54215	up	2.48599e-10	1.04065e-08
64766	S100PBP	S100P binding protein	7.5415	7.45131	7.5418	8.8856	8.89053	8.91456	-2.61237	-1.38536	2.61237	down	1.99578e-14	1.0066e-11
1977	EIF4E	eukaryotic translation initiation factor 4E	5.27774	5.15992	5.0701	6.5985	6.77651	6.80726	-2.9448	-1.55817	2.9448	down	1.44963e-11	1.1558e-09
327	APEH	acylaminoacyl-peptide hydrolase	10.041	10.048	10.0584	9.40333	9.3505	9.32591	1.61242	0.689223	1.61242	up	6.42379e-12	6.32832e-10
2113	ETS1	v-ets avian erythroblastosis virus E26 oncogene homolog 1	11.1796	11.1769	11.2046	11.8087	11.7774	11.8133	-1.5292	-0.612773	1.5292	down	3.63023e-13	7.6565e-11
163786	SASS6	SAS-6 centriolar assembly protein	7.15559	7.10059	7.08746	7.81991	7.90139	7.94327	-1.70958	-0.773643	1.70958	down	6.72639e-10	2.26036e-08
401466	C8orf59	chromosome 8 open reading frame 59	8.71396	8.6988	8.82938	7.86847	7.89636	7.80207	1.85542	0.891747	1.85542	up	2.79502e-11	1.85895e-09
9697	TRAM2	translocation associated membrane protein 2	8.94735	8.92508	8.94415	9.55126	9.52426	9.57017	-1.52595	-0.609703	1.52595	down	6.08929e-11	3.43896e-09
55776	SAYSD1	SAYSVFN motif domain containing 1	5.10624	5.27005	5.25127	6.14713	5.89546	5.91694	-1.71395	-0.777323	1.71395	down	3.31382e-07	3.54728e-06
25978	CHMP2B	charged multivesicular body protein 2B	9.75229	9.63942	9.70725	7.73827	7.8418	8.03577	3.54972	1.82771	3.54972	up	3.02864e-14	1.26646e-11
210	ALAD	aminolevulinate dehydratase	7.74713	7.68978	7.80171	7.12538	7.03586	7.19508	1.54481	0.627433	1.54481	up	2.85469e-08	4.631e-07
123606	NIPA1	non imprinted in Prader-Willi/Angelman syndrome 1	6.98481	6.78902	6.91444	7.52424	7.46898	7.66808	-1.57754	-0.657677	1.57754	down	1.14876e-07	1.45489e-06
23095	KIF1B	kinesin family member 1B	8.64304	8.59982	8.58728	9.33105	9.33933	9.34159	-1.65551	-0.727277	1.65551	down	1.1446e-11	9.6963e-10
5051	PAFAH2	platelet-activating factor acetylhydrolase 2	6.45832	6.37289	6.52508	7.61161	7.66476	7.63439	-2.27336	-1.18482	2.27336	down	7.71471e-12	7.281e-10
79901	CYBRD1	cytochrome b reductase 1	4.86881	4.5511	4.62268	5.30205	5.06599	5.51493	-1.52992	-0.61346	1.52992	down	9.91043e-05	0.00046804
847	CAT	catalase	9.43764	9.35162	9.39527	8.76631	8.812	8.84355	1.5027	0.587557	1.5027	up	4.54598e-10	1.66217e-08
27044	SND1	staphylococcal nuclease and tudor domain containing 1	9.94025	9.93357	9.88456	8.99987	8.99979	8.99129	1.89537	0.922477	1.89537	up	1.30164e-13	3.87602e-11
29880	ALG5	ALG5, dolichyl-phosphate beta-glucosyltransferase	9.58464	9.5508	9.62058	8.46837	8.46309	8.56828	2.122	1.08543	2.122	up	1.76154e-13	4.87718e-11
284992	CCDC150	coiled-coil domain containing 150	4.34243	4.09131	4.12463	4.93576	5.02915	5.32564	-1.87999	-0.910727	1.87999	down	7.62951e-07	7.15224e-06
117584	RFFL	ring finger and FYVE-like domain containing E3 ubiquitin protein ligase	7.74253	7.80095	7.79098	8.36893	8.40783	8.35916	-1.51623	-0.600487	1.51623	down	1.94713e-09	5.23142e-08
29102	DROSHA	drosha, ribonuclease type III	3.95652	4.19848	3.93616	4.56877	4.57281	4.79248	-1.53082	-0.6143	1.53082	down	2.85679e-05	0.000157603
7581	ZNF33A	zinc finger protein 33A	5.82264	5.86057	5.89794	5.31059	5.15917	5.25594	1.53526	0.618483	1.53526	up	1.04448e-06	9.31379e-06
4233	MET	MET proto-oncogene, receptor tyrosine kinase	6.01198	5.92235	6.11971	6.71105	6.50727	6.67406	-1.5292	-0.61278	1.5292	down	1.2993e-06	1.12073e-05
92255	LMBRD2	LMBR1 domain containing 2	5.90205	5.76011	5.82881	4.96078	5.28671	5.35015	1.54876	0.63111	1.54876	up	1.50757e-05	9.08446e-05
2218	FKTN	fukutin	7.10261	7.0706	7.10594	7.89774	7.88065	7.90608	-1.74324	-0.801773	1.74324	down	1.41558e-10	6.59267e-09
11158	RABL2B	RAB, member of RAS oncogene family-like 2B	7.64673	7.41224	7.54072	6.53556	6.68465	6.8023	1.81386	0.85906	1.81386	up	1.62916e-08	2.92276e-07
80204	FBXO11	F-box protein 11	4.58249	4.59982	4.55379	3.6568	3.97047	3.9084	1.66264	0.733477	1.66264	up	2.71082e-06	2.09753e-05
284443	ZNF493	zinc finger protein 493	5.12247	5.04544	5.15728	4.1552	4.3782	4.25637	1.79644	0.84514	1.79644	up	1.42314e-07	1.74483e-06
79960	JADE1	jade family PHD finger 1	6.53138	6.50068	6.74698	7.30555	7.28139	7.24196	-1.60579	-0.683287	1.60579	down	9.72651e-08	1.27101e-06
3783	KCNN4	potassium channel, calcium activated intermediate/small conductance subfamily N alpha, member 4	8.99277	8.93738	8.91102	9.53708	9.54057	9.62911	-1.53886	-0.621863	1.53886	down	2.38514e-10	1.01191e-08
27086	FOXP1	forkhead box P1	6.2443	5.83587	5.96615	7.00569	6.94803	6.94821	-1.93438	-0.95187	1.93438	down	3.02506e-08	4.85926e-07
152006	RNF38	ring finger protein 38	7.91816	7.94065	7.82368	9.26521	9.15906	9.29673	-2.54236	-1.34617	2.54236	down	8.21179e-14	2.66761e-11
7587	ZNF37A	zinc finger protein 37A	8.08021	8.05365	8.15476	7.44136	7.49411	7.42889	1.55986	0.64142	1.55986	up	3.17738e-09	7.79122e-08
125208	RPS2P46	ribosomal protein S2 pseudogene 46	11.0895	11.356	11.0729	10.6611	10.5246	10.5491	1.50996	0.594513	1.50996	up	7.20382e-08	9.89882e-07
80329	ULBP1	UL16 binding protein 1	6.01125	5.9874	6.10486	7.1363	7.14819	7.41123	-2.29327	-1.1974	2.29327	down	2.72013e-10	1.11958e-08
389792	IER5L	immediate early response 5-like	6.86263	6.79327	6.82697	7.75034	7.68294	7.777	-1.87792	-0.909137	1.87792	down	9.10148e-11	4.75734e-09
83544	DNAL1	dynein, axonemal, light chain 1	5.43782	5.45199	5.2046	6.20788	6.21761	6.04778	-1.73262	-0.792953	1.73262	down	2.25464e-07	2.57626e-06
222068	TMED4	transmembrane p24 trafficking protein 4	7.79456	7.81622	7.78689	8.61668	8.61663	8.57001	-1.74338	-0.801883	1.74338	down	2.23244e-11	1.59546e-09
4259	MGST3	microsomal glutathione S-transferase 3	10.3923	10.2511	10.4122	11.107	11.1536	11.1585	-1.72647	-0.787827	1.72647	down	5.53722e-12	5.69769e-10
115752	DIS3L	DIS3 like exosome 3'-5' exoribonuclease	4.98489	4.87725	4.71797	5.55287	5.73258	5.80126	-1.78452	-0.835533	1.78452	down	3.17667e-07	3.42472e-06
23531	MMD	monocyte to macrophage differentiation-associated	5.44213	5.13562	5.16707	6.10923	6.13837	6.12957	-1.83713	-0.87745	1.83713	down	7.11667e-08	9.79807e-07
4673	NAP1L1	nucleosome assembly protein 1-like 1	6.69362	6.68982	6.69355	7.19611	7.40052	7.43957	-1.57251	-0.65307	1.57251	down	1.16847e-07	1.47539e-06
1353	COX11	COX11 cytochrome c oxidase copper chaperone	9.83111	9.73796	9.86486	9.17718	9.16303	9.19466	1.55081	0.63302	1.55081	up	1.26528e-10	6.08156e-09
9491	PSMF1	proteasome inhibitor subunit 1	5.40847	5.49241	5.56892	5.98429	6.29345	6.05856	-1.53919	-0.622167	1.53919	down	5.15111e-06	3.62793e-05
4929	NR4A2	nuclear receptor subfamily 4 group A member 2	3.95001	3.34692	3.68987	4.31411	4.24034	4.20114	-1.50483	-0.589597	1.50483	down	0.000369776	0.00146935
2861	GPR37	G protein-coupled receptor 37 (endothelin receptor type B-like)	6.40565	6.17864	6.31468	6.86157	6.90564	7.20985	-1.6163	-0.692697	1.6163	down	1.76077e-06	1.44913e-05
64901	RANBP17	RAN binding protein 17	6.31956	6.16603	6.31904	5.56395	5.77744	5.59344	1.54036	0.623267	1.54036	up	1.78221e-06	1.46206e-05
100506965	PWAR6	Prader Willi/Angelman region RNA 6	5.06514	4.95717	5.02986	4.18738	4.32572	4.60781	1.56239	0.643753	1.56239	up	2.28614e-05	0.000130366
10148	EBI3	Epstein-Barr virus induced 3	8.47603	8.45388	8.48293	8.97435	9.07709	9.20976	-1.53275	-0.61612	1.53275	down	9.49425e-09	1.87533e-07
203523	ZNF449	zinc finger protein 449	6.28287	6.13335	6.33151	6.7001	6.98999	6.83243	-1.50691	-0.591597	1.50691	down	3.45316e-06	2.57597e-05
10531	PITRM1	pitrilysin metallopeptidase 1	7.84074	7.8525	7.83085	8.39453	8.42373	8.48988	-1.51014	-0.594683	1.51014	down	2.46851e-09	6.35427e-08
55832	CAND1	cullin-associated and neddylation-dissociated 1	6.82976	6.76364	6.86095	7.4842	7.6463	7.56293	-1.67755	-0.74636	1.67755	down	4.56105e-09	1.03571e-07
8971	H1FX	H1 histone family member X	9.73441	9.72039	9.69735	10.4322	10.4068	10.4262	-1.62941	-0.704347	1.62941	down	1.05887e-12	1.68506e-10
102723680	CT45A9	cancer/testis antigen family 45, member A9	7.17178	7.35035	7.34255	6.59623	6.57423	6.45535	1.67747	0.74629	1.67747	up	2.21146e-08	3.76466e-07
11160	ERLIN2	ER lipid raft associated 2	7.28433	7.3421	7.33793	8.10844	8.07635	7.99216	-1.66732	-0.73753	1.66732	down	7.11322e-10	2.36348e-08
55319	TMA16	translation machinery associated 16 homolog	5.6752	5.54772	5.68857	6.35595	6.49554	6.50961	-1.76117	-0.816537	1.76117	down	2.58513e-08	4.28207e-07
2987	GUK1	guanylate kinase 1	10.0292	9.99771	10.0513	9.34102	9.34909	9.34239	1.60426	0.68191	1.60426	up	4.67957e-12	5.10944e-10
25957	PNISR	PNN-interacting serine/arginine-rich protein	6.1298	6.02751	6.09564	6.82552	6.76847	6.67158	-1.59204	-0.670873	1.59204	down	9.16281e-08	1.21022e-06
10260	DENND4A	DENN/MADD domain containing 4A	7.12673	7.08129	7.16903	6.30598	6.28699	6.45904	1.71121	0.775013	1.71121	up	9.67078e-09	1.90446e-07
166968	MIER3	mesoderm induction early response 1, family member 3	7.40631	7.11938	7.20201	7.76555	7.88	7.91307	-1.52658	-0.610307	1.52658	down	4.44607e-07	4.56177e-06
54454	ATAD2B	ATPase family, AAA domain containing 2B	4.32298	4.53653	4.77218	5.98668	5.93888	6.08951	-2.75323	-1.46113	2.75323	down	8.83681e-10	2.79669e-08
116447	TOP1MT	topoisomerase (DNA) I, mitochondrial	9.46719	9.3716	9.5221	8.07447	8.13934	7.99249	2.61147	1.38486	2.61147	up	7.05427e-14	2.41115e-11
221092	HNRNPUL2	heterogeneous nuclear ribonucleoprotein U-like 2	8.55213	8.56857	8.78442	7.79445	7.80727	8.03006	1.69089	0.75778	1.69089	up	2.92787e-08	4.73106e-07
51660	MPC1	mitochondrial pyruvate carrier 1	7.4124	7.29833	7.34315	6.38617	6.56132	6.42399	1.85849	0.894133	1.85849	up	1.17732e-09	3.53258e-08
113115	MTFR2	mitochondrial fission regulator 2	7.36697	7.29847	7.32038	8.28037	8.31337	8.32374	-1.96867	-0.97722	1.96867	down	5.12943e-12	5.43457e-10
3921	RPSA	ribosomal protein SA	8.45127	8.30288	8.47879	7.54434	7.49736	7.65175	1.79813	0.846497	1.79813	up	5.49952e-10	1.93009e-08
79762	C1orf115	chromosome 1 open reading frame 115	7.72119	7.70423	7.68415	6.5842	6.68135	6.69641	2.06939	1.0492	2.06939	up	1.84317e-11	1.3644e-09
3572	IL6ST	interleukin 6 signal transducer	7.96506	7.78561	7.86664	8.54369	8.52981	8.63476	-1.62111	-0.696983	1.62111	down	2.32431e-09	6.03046e-08
950	SCARB2	scavenger receptor class B, member 2	9.06759	8.98645	9.06712	10.5639	10.5451	10.5999	-2.88632	-1.52923	2.88632	down	1.36487e-16	4.47076e-13
5274	SERPINI1	serpin peptidase inhibitor, clade I (neuroserpin), member 1	7.03986	6.75977	7.03997	4.98188	5.25753	4.83404	3.78961	1.92205	3.78961	up	2.6568e-11	1.79743e-09
3669	ISG20	interferon stimulated exonuclease gene 20kDa	5.66834	5.73745	5.73902	6.43683	6.46777	6.72	-1.7735	-0.826597	1.7735	down	6.44117e-08	9.05843e-07
84707	BEX2	brain expressed X-linked 2	5.50326	5.51578	5.4793	6.55008	6.38468	6.64396	-2.03749	-1.02679	2.03749	down	2.11672e-09	5.60233e-08
51105	PHF20L1	PHD finger protein 20-like 1	6.84634	6.7012	6.55846	7.64684	7.70786	7.47643	-1.87693	-0.908377	1.87693	down	1.04101e-08	2.02274e-07
348654	GEN1	GEN1, Holliday junction 5' flap endonuclease	5.43238	4.88721	5.51174	6.07121	5.85955	6.14131	-1.6782	-0.746913	1.6782	down	5.91984e-05	0.0002968
11159	RABL2A	RAB, member of RAS oncogene family-like 2A	7.55348	7.51162	7.37167	6.87748	6.68303	6.84752	1.59798	0.676247	1.59798	up	8.84792e-08	1.17427e-06
677842	SNORA50C	small nucleolar RNA, H/ACA box 50C	5.46216	5.63471	5.79924	4.80525	4.94158	4.73555	1.74663	0.804577	1.74663	up	7.1595e-07	6.79099e-06
10464	PIBF1	progesterone immunomodulatory binding factor 1	5.18973	5.30323	5.29737	4.40987	4.77788	4.72236	1.54407	0.62674	1.54407	up	1.961e-05	0.000114142
1491	CTH	cystathionine gamma-lyase	6.47087	6.47592	6.58602	7.0282	7.0123	7.24913	-1.50067	-0.585607	1.50067	down	1.0834e-06	9.60644e-06
7095	SEC62	SEC62 homolog, preprotein translocation factor	5.66541	5.64864	5.60275	6.697	6.58313	6.72012	-2.03894	-1.02782	2.03894	down	4.44846e-10	1.64184e-08
6187	RPS2	ribosomal protein S2	11.0895	11.356	11.0729	10.6611	10.5246	10.5491	1.50996	0.594513	1.50996	up	7.20382e-08	9.89882e-07
1956	EGFR	epidermal growth factor receptor	6.73289	6.7383	6.82194	7.50562	7.44413	7.5297	-1.65723	-0.728773	1.65723	down	3.18516e-09	7.80544e-08
55166	CENPQ	centromere protein Q	7.14021	7.10521	7.16001	8.09089	8.13314	8.06304	-1.94605	-0.960547	1.94605	down	1.21801e-11	1.01005e-09
8243	SMC1A	structural maintenance of chromosomes 1A	8.39173	8.31695	8.56468	9.41522	9.41804	9.54375	-2.04847	-1.03455	2.04847	down	3.28584e-11	2.0907e-09
7846	TUBA1A	tubulin, alpha 1a	10.2683	10.1853	10.3006	9.58826	9.64021	9.67365	1.53405	0.617343	1.53405	up	1.18918e-10	5.82833e-09
11234	HPS5	Hermansky-Pudlak syndrome 5	6.66862	6.80201	6.73768	7.34713	7.32215	7.42581	-1.54641	-0.628927	1.54641	down	4.37738e-08	6.58988e-07
4775	NFATC3	nuclear factor of activated T-cells, cytoplasmic, calcineurin-dependent 3	6.81988	6.53987	6.85679	7.41858	7.48743	7.59786	-1.69636	-0.762443	1.69636	down	1.37979e-07	1.69911e-06
64859	NABP1	nucleic acid binding protein 1	7.12392	6.9229	7.14553	5.66313	5.78338	5.89105	2.4367	1.28493	2.4367	up	1.4719e-10	6.78571e-09
10052	GJC1	gap junction protein gamma 1	9.73157	9.62945	9.78258	10.5439	10.5711	10.6055	-1.81371	-0.85894	1.81371	down	1.86036e-12	2.54791e-10
221895	JAZF1	JAZF zinc finger 1	6.05722	5.8386	5.86897	6.74935	6.58477	6.76357	-1.71432	-0.777633	1.71432	down	8.91305e-08	1.182e-06
92092	ZC3HAV1L	zinc finger CCCH-type, antiviral 1-like	7.09695	7.08985	7.04897	8.553	8.62818	8.59278	-2.85349	-1.51273	2.85349	down	1.15714e-14	7.3361e-12
25758	KIAA1549L	KIAA1549-like	6.20813	6.10417	5.87957	6.60777	6.697	6.69236	-1.51756	-0.601753	1.51756	down	3.30996e-06	2.49004e-05
79137	FAM134A	family with sequence similarity 134 member A	8.11771	8.07045	8.16329	8.92041	9.0205	9.0278	-1.83073	-0.87242	1.83073	down	1.41419e-11	1.14067e-09
5824	PEX19	peroxisomal biogenesis factor 19	7.85741	7.76875	7.81005	6.39335	6.38477	6.35676	2.70153	1.43378	2.70153	up	2.07068e-13	5.21745e-11
192670	AGO4	argonaute 4, RISC catalytic component	4.72236	4.53936	4.62593	5.25255	5.32306	5.70207	-1.7371	-0.796677	1.7371	down	3.82796e-06	2.81612e-05
80336	PABPC1L	poly(A) binding protein, cytoplasmic 1-like	9.42246	9.37222	9.34965	10.1641	10.1241	10.2305	-1.73085	-0.791477	1.73085	down	3.06331e-12	3.75108e-10
6541	SLC7A1	solute carrier family 7 (cationic amino acid transporter, y+ system), member 1	8.27041	8.19613	8.16549	9.12211	9.09536	9.1236	-1.86997	-0.903013	1.86997	down	2.94694e-12	3.61986e-10
5901	RAN	RAN, member RAS oncogene family	10.5465	10.5775	10.5455	9.53997	9.48831	9.42558	2.10219	1.07189	2.10219	up	1.99747e-14	1.0066e-11
94081	SFXN1	sideroflexin 1	7.32006	7.29711	7.33275	8.56211	8.41863	8.54416	-2.28415	-1.19166	2.28415	down	8.73802e-13	1.46287e-10
4591	TRIM37	tripartite motif containing 37	7.11065	6.96784	7.22232	8.35267	8.40334	8.58721	-2.54465	-1.34747	2.54465	down	1.51771e-11	1.19433e-09
152002	XXYLT1	xyloside xylosyltransferase 1	5.50952	6.05668	5.81256	6.66472	6.61352	6.72	-1.83167	-0.87316	1.83167	down	8.72781e-07	8.00617e-06
5567	PRKACB	protein kinase, cAMP-dependent, beta catalytic subunit	5.44888	5.27392	5.26935	6.32325	6.43727	6.39572	-2.07728	-1.0547	2.07728	down	1.31897e-09	3.85749e-08
4898	NRDC	nardilysin convertase	9.44746	9.41929	9.49502	8.77342	8.76662	8.75398	1.61245	0.68925	1.61245	up	2.35664e-11	1.6572e-09
10903	MTMR11	myotubularin related protein 11	5.39565	5.6926	5.42915	6.28699	6.38268	6.36992	-1.79096	-0.84073	1.79096	down	9.23623e-08	1.21893e-06
1047	CLGN	calmegin	6.1379	6.06709	6.1919	5.5263	5.39528	5.62626	1.53299	0.61635	1.53299	up	1.77317e-06	1.4575e-05
7518	XRCC4	X-ray repair complementing defective repair in Chinese hamster cells 4	6.06207	6.13113	6.00665	6.61106	6.72617	6.71489	-1.53413	-0.617423	1.53413	down	2.54506e-07	2.84039e-06
4836	NMT1	N-myristoyltransferase 1	8.10567	8.02006	8.04391	7.39768	7.32807	7.34796	1.62298	0.698643	1.62298	up	1.00907e-09	3.106e-08
22832	CEP162	centrosomal protein 162kDa	5.20217	5.01742	4.95957	5.60287	5.68872	5.94735	-1.60948	-0.686593	1.60948	down	6.38134e-06	4.35622e-05
3625	INHBB	inhibin beta B	6.25679	6.12648	6.62575	6.97942	6.96273	6.86608	-1.51544	-0.599737	1.51544	down	3.07676e-05	0.000168002
9801	MRPL19	mitochondrial ribosomal protein L19	6.71632	6.53576	6.78211	7.79481	7.85232	7.85464	-2.22817	-1.15586	2.22817	down	4.07896e-11	2.48192e-09
57718	PPP4R4	protein phosphatase 4, regulatory subunit 4	6.2614	5.96835	6.07772	6.899	6.88528	6.87269	-1.7209	-0.783167	1.7209	down	5.08022e-08	7.41508e-07
4314	MMP3	matrix metallopeptidase 3	4.77622	4.36951	4.4774	5.60625	5.77173	6.37366	-2.59578	-1.37617	2.59578	down	4.11366e-07	4.25291e-06
10000	AKT3	v-akt murine thymoma viral oncogene homolog 3	4.68252	4.44024	4.56076	5.33659	5.24236	5.29211	-1.6577	-0.72918	1.6577	down	7.27745e-07	6.87797e-06
25816	TNFAIP8	TNF alpha induced protein 8	5.51493	5.56848	5.46184	6.28795	6.3733	6.29287	-1.74467	-0.802957	1.74467	down	1.65867e-08	2.96216e-07
81928	CABLES2	Cdk5 and Abl enzyme substrate 2	6.46905	6.35684	6.4193	7.60872	7.69426	7.89729	-2.49382	-1.31836	2.49382	down	2.56703e-11	1.75788e-09
8091	HMGA2	high mobility group AT-hook 2	9.76774	9.75013	9.71533	11.616	11.5137	11.5665	-3.53323	-1.82099	3.53323	down	2.92387e-18	5.74643e-14
54495	TMX3	thioredoxin-related transmembrane protein 3	9.2398	9.14374	9.24124	7.92486	7.81966	7.90987	2.50266	1.32346	2.50266	up	5.02553e-14	1.91785e-11
26505	CNNM3	cyclin and CBS domain divalent metal cation transport mediator 3	6.14336	6.03188	6.20086	6.71931	6.69316	7.00023	-1.60088	-0.678867	1.60088	down	1.10265e-06	9.74345e-06
149076	ZNF362	zinc finger protein 362	7.40152	7.47115	7.27979	8.01698	8.00947	8.04875	-1.55932	-0.640913	1.55932	down	1.32847e-08	2.46661e-07
26147	PHF19	PHD finger protein 19	7.14054	7.18079	7.198	8.17056	8.28576	8.27124	-2.09857	-1.06941	2.09857	down	4.31733e-12	4.78032e-10
5980	REV3L	REV3 like, DNA directed polymerase zeta catalytic subunit	7.62244	7.49664	7.64506	8.59216	8.67397	8.62443	-2.05928	-1.04214	2.05928	down	5.59404e-12	5.71878e-10
55144	LRRC8D	leucine-rich repeat containing 8 family member D	7.20435	7.03796	7.14259	7.63295	7.76712	7.79571	-1.51953	-0.603627	1.51953	down	1.08169e-07	1.38587e-06
4853	NOTCH2	notch 2	7.38259	7.35747	7.33146	8.5435	8.41766	8.52833	-2.20278	-1.13932	2.20278	down	1.21377e-12	1.86366e-10
3417	IDH1	isocitrate dehydrogenase 1 (NADP+)	9.56164	9.51307	9.62579	8.94315	8.99158	8.99582	1.50523	0.589983	1.50523	up	4.04029e-10	1.51973e-08
7322	UBE2D2	ubiquitin conjugating enzyme E2D 2	4.67954	4.5099	4.69302	5.38568	5.36045	5.65392	-1.78905	-0.839197	1.78905	down	4.38571e-07	4.5069e-06
23405	DICER1	dicer 1, ribonuclease type III	6.57315	6.32915	6.4513	7.38127	7.32903	7.47177	-1.92229	-0.942823	1.92229	down	1.71213e-09	4.72936e-08
55706	NDC1	NDC1 transmembrane nucleoporin	9.06517	8.99596	8.96743	9.67449	9.69253	9.69742	-1.60062	-0.678627	1.60062	down	2.83933e-11	1.88523e-09
10721	POLQ	polymerase (DNA directed), theta	7.9727	8.02283	7.97812	8.8034	8.73052	8.77668	-1.71592	-0.778983	1.71592	down	3.09798e-11	2.00944e-09
9804	TOMM20	translocase of outer mitochondrial membrane 20 homolog (yeast)	7.92107	7.82109	7.80107	7.24733	7.28205	7.1893	1.52434	0.608183	1.52434	up	1.85038e-08	3.23402e-07
26127	FGFR1OP2	FGFR1 oncogene partner 2	7.68657	7.54322	7.6647	6.68358	6.91591	6.87228	1.75026	0.807573	1.75026	up	9.07652e-09	1.80369e-07
8905	AP1S2	adaptor-related protein complex 1 sigma 2 subunit	5.15375	4.88902	4.95771	6.43979	6.33638	6.20255	-2.50721	-1.32608	2.50721	down	4.51294e-10	1.65591e-08
9532	BAG2	BCL2 associated athanogene 2	7.38934	7.36714	7.49429	8.22431	8.3112	8.23665	-1.79063	-0.840463	1.79063	down	1.42926e-10	6.63282e-09
196074	METTL15	methyltransferase like 15	5.34884	4.84421	5.45789	5.94455	5.8536	6.06035	-1.66538	-0.735853	1.66538	down	4.15328e-05	0.000217845
360132	FKBP9P1	FK506 binding protein 9 pseudogene 1	5.40165	5.45876	5.69257	6.31209	6.24064	6.54904	-1.802	-0.849597	1.802	down	3.39196e-07	3.62107e-06
2260	FGFR1	fibroblast growth factor receptor 1	5.75702	5.60786	5.52443	5.27322	4.9395	4.89672	1.50868	0.59329	1.50868	up	4.8071e-05	0.000247191
5519	PPP2R1B	protein phosphatase 2 regulatory subunit A, beta	6.13026	5.98375	6.09628	7.8807	8.06777	7.75425	-3.55737	-1.83081	3.55737	down	5.86427e-13	1.07505e-10
56951	C5orf15	chromosome 5 open reading frame 15	7.73172	7.57044	7.76764	6.80548	6.76269	6.91731	1.81685	0.86144	1.81685	up	2.18335e-09	5.74436e-08
81831	NETO2	neuropilin and tolloid like 2	9.08074	8.9843	8.9871	10.4211	10.4395	10.4493	-2.67451	-1.41927	2.67451	down	5.27404e-16	9.01334e-13
9349	RPL23	ribosomal protein L23	7.64338	7.52833	7.67149	6.88776	6.90403	6.94613	1.62649	0.70176	1.62649	up	5.74453e-09	1.24614e-07
5877	RABIF	RAB interacting factor	6.65579	6.5889	6.67357	7.44497	7.35977	7.38445	-1.68995	-0.756977	1.68995	down	2.30473e-09	5.99549e-08
55802	DCP1A	decapping mRNA 1A	8.11338	8.07916	8.06269	8.97329	8.98086	8.93238	-1.83668	-0.8771	1.83668	down	3.17473e-12	3.85639e-10
26009	ZZZ3	zinc finger, ZZ-type containing 3	9.24653	9.24444	9.34733	8.52094	8.41955	8.51371	1.73472	0.7947	1.73472	up	3.60456e-11	2.25972e-09
92370	PXYLP1	2-phosphoxylose phosphatase 1	7.28553	7.26929	7.33663	8.15441	8.1885	8.22271	-1.85496	-0.89139	1.85496	down	2.68494e-11	1.81024e-09
11339	OIP5	Opa interacting protein 5	8.67126	8.65524	8.64325	9.30455	9.35855	9.35715	-1.60603	-0.6835	1.60603	down	2.85537e-11	1.8895e-09
22999	RIMS1	regulating synaptic membrane exocytosis 1	7.05886	7.13734	7.31502	6.21284	6.27831	6.37105	1.84421	0.883007	1.84421	up	8.4902e-09	1.70397e-07
51347	TAOK3	TAO kinase 3	5.4638	5.30695	5.53854	4.37675	4.60763	4.8446	1.77371	0.82677	1.77371	up	2.71753e-06	2.10106e-05
10605	PAIP1	poly(A) binding protein interacting protein 1	9.63557	9.57651	9.84251	7.61668	7.83238	7.85816	3.7732	1.91579	3.7732	up	8.64704e-14	2.76333e-11
646243	CXADRP2	coxsackie virus and adenovirus receptor pseudogene 2	7.00498	6.9279	7.10445	6.33682	6.45578	6.4256	1.52243	0.606377	1.52243	up	2.61203e-07	2.90359e-06
105370109	LOC105370109	uncharacterized LOC105370109	9.3947	9.34087	9.37054	9.94783	9.96594	10.0523	-1.53687	-0.619997	1.53687	down	8.7838e-11	4.62821e-09
79682	CENPU	centromere protein U	6.53647	6.6541	6.59904	7.23309	7.20635	7.18784	-1.52897	-0.612557	1.52897	down	4.92272e-08	7.22275e-07
29979	UBQLN1	ubiquilin 1	9.70536	9.63353	9.66721	10.2274	10.251	10.3207	-1.51328	-0.59768	1.51328	down	7.82698e-11	4.1972e-09
497661	C18orf32	chromosome 18 open reading frame 32	8.02066	8.01067	8.05255	9.59002	9.49389	9.56095	-2.86856	-1.52033	2.86856	down	1.28843e-15	1.80872e-12
8028	MLLT10	myeloid/lymphoid or mixed-lineage leukemia; translocated to, 10	8.82172	8.67523	8.72387	7.94144	7.88506	7.98183	1.74613	0.804163	1.74613	up	1.22042e-10	5.92341e-09
29967	LRP12	LDL receptor related protein 12	6.40985	6.51044	6.42682	7.14324	7.25475	7.33111	-1.73387	-0.793997	1.73387	down	6.47011e-09	1.37619e-07
6044	SNORA62	small nucleolar RNA, H/ACA box 62	8.45127	8.30288	8.47879	7.54434	7.49736	7.65175	1.79813	0.846497	1.79813	up	5.49952e-10	1.93009e-08
23193	GANAB	glucosidase, alpha; neutral AB	9.64753	9.61677	9.76811	8.78793	8.75314	8.68315	1.9133	0.936063	1.9133	up	4.86859e-12	5.24301e-10
51542	VPS54	VPS54 GARP complex subunit	7.97227	7.82171	7.94137	8.81477	8.75314	8.83894	-1.85382	-0.8905	1.85382	down	3.17902e-11	2.04179e-09
5825	ABCD3	ATP binding cassette subfamily D member 3	8.47415	8.36502	8.32174	7.14868	7.35933	7.19673	2.2223	1.15206	2.2223	up	1.87783e-11	1.37966e-09
7168	TPM1	tropomyosin 1 (alpha)	7.93382	7.91324	7.9562	8.8042	8.87137	8.97865	-1.9323	-0.95032	1.9323	down	1.14758e-11	9.70066e-10
4677	NARS	asparaginyl-tRNA synthetase	10.0693	9.94347	10.0572	9.42198	9.42477	9.44582	1.50782	0.592463	1.50782	up	2.48522e-10	1.04065e-08
57669	EPB41L5	erythrocyte membrane protein band 4.1 like 5	7.61402	7.47759	7.52309	6.93888	6.93961	6.92125	1.52096	0.604987	1.52096	up	3.07238e-08	4.91318e-07
160518	DENND5B	DENN/MADD domain containing 5B	7.64209	7.62232	7.63886	6.85669	7.1221	6.99106	1.56317	0.644473	1.56317	up	9.05255e-08	1.19646e-06
55719	SLF2	SMC5-SMC6 complex localization factor 2	7.77439	7.59532	7.64142	8.36376	8.40136	8.39788	-1.64409	-0.71729	1.64409	down	1.36903e-09	3.97139e-08
23208	SYT11	synaptotagmin 11	5.03777	4.71259	4.69874	5.39936	5.52377	5.66868	-1.64061	-0.714237	1.64061	down	6.92031e-06	4.66701e-05
100158262	SCARNA9L	small Cajal body-specific RNA 9-like	5.53321	5.46482	5.5346	4.75999	5.07405	4.8298	1.54	0.62293	1.54	up	7.56398e-06	5.03416e-05
10890	RAB10	RAB10, member RAS oncogene family	9.5915	9.4965	9.63571	8.77201	8.83111	8.92853	1.65943	0.730687	1.65943	up	2.69686e-10	1.11352e-08
163702	IFNLR1	interferon, lambda receptor 1	5.39449	5.49426	5.39305	5.95149	6.02419	6.21341	-1.55376	-0.635763	1.55376	down	1.95832e-06	1.58224e-05
23169	SLC35D1	solute carrier family 35 (UDP-GlcA/UDP-GalNAc transporter), member D1	5.63086	5.52626	5.60741	6.67	6.71625	6.71556	-2.16209	-1.11243	2.16209	down	1.07562e-10	5.39967e-09
92400	RBM18	RNA binding motif protein 18	8.38847	8.37114	8.24092	7.57039	7.50595	7.51265	1.74575	0.803847	1.74575	up	2.65712e-10	1.10056e-08
26073	POLDIP2	polymerase (DNA-directed), delta interacting protein 2	8.37289	8.31379	8.42417	7.67035	7.8445	7.63725	1.57234	0.652917	1.57234	up	1.64378e-08	2.94092e-07
8976	WASL	Wiskott-Aldrich syndrome-like	8.5434	8.36524	8.47299	7.71468	7.81772	7.81303	1.60073	0.678733	1.60073	up	4.01634e-09	9.38587e-08
5265	SERPINA1	serpin peptidase inhibitor, clade A (alpha-1 antiproteinase, antitrypsin), member 1	6.15043	6.15207	6.08574	6.71747	6.74275	6.81151	-1.54524	-0.62783	1.54524	down	1.0377e-07	1.3391e-06
57827	C6orf47	chromosome 6 open reading frame 47	6.46235	6.22514	6.22496	5.24311	5.25537	5.16539	2.11823	1.08286	2.11823	up	2.20768e-09	5.79675e-08
7077	TIMP2	TIMP metallopeptidase inhibitor 2	8.02495	7.91324	7.93243	9.25159	9.21219	9.3318	-2.47653	-1.30832	2.47653	down	6.85533e-14	2.37898e-11
4430	MYO1B	myosin IB	8.11107	8.1273	8.13337	8.68846	8.77074	8.7447	-1.52702	-0.61072	1.52702	down	7.07293e-10	2.35407e-08
10469	TIMM44	translocase of inner mitochondrial membrane 44 homolog (yeast)	8.26511	8.30211	8.35049	7.59716	7.55591	7.68594	1.61653	0.6929	1.61653	up	1.30368e-09	3.83131e-08
57211	ADGRG6	adhesion G protein-coupled receptor G6	6.09479	5.75061	6.04376	6.82221	6.55198	6.68253	-1.65006	-0.72252	1.65006	down	1.90731e-06	1.5477e-05
5429	POLH	polymerase (DNA directed), eta	5.4986	5.19332	5.41615	5.97916	5.97992	6.03275	-1.54534	-0.62792	1.54534	down	3.36504e-06	2.52279e-05
1462	VCAN	versican	6.47422	6.34319	6.53465	7.40301	7.37899	7.54824	-1.98994	-0.992727	1.98994	down	6.2369e-10	2.14106e-08
1979	EIF4EBP2	eukaryotic translation initiation factor 4E binding protein 2	5.74829	5.42594	5.71663	6.45764	6.58875	6.74492	-1.95452	-0.966817	1.95452	down	6.54074e-08	9.16893e-07
85379	KIAA1671	KIAA1671	7.96202	7.88168	8.00214	8.47275	8.52912	8.60995	-1.50385	-0.58866	1.50385	down	1.10187e-08	2.11687e-07
8079	MLF2	myeloid leukemia factor 2	10.0953	10.1569	10.0922	9.5919	9.50062	9.46054	1.5127	0.597123	1.5127	up	2.7911e-10	1.13925e-08
6605	SMARCE1	SWI/SNF related, matrix associated, actin dependent regulator of chromatin, subfamily e, member 1	8.50099	8.25902	8.50062	7.52126	7.57571	7.7042	1.76519	0.81982	1.76519	up	6.31721e-09	1.34951e-07
9180	OSMR	oncostatin M receptor	7.85743	7.72714	7.72096	8.71597	8.74472	8.72364	-1.94477	-0.9596	1.94477	down	8.00264e-12	7.40141e-10
84376	HOOK3	hook microtubule-tethering protein 3	5.27958	5.06458	5.2968	6.36854	6.47816	6.52925	-2.37018	-1.245	2.37018	down	3.733e-10	1.43014e-08
9690	UBE3C	ubiquitin protein ligase E3C	7.80049	7.68517	7.74703	8.37058	8.34014	8.28435	-1.5026	-0.58746	1.5026	down	7.68196e-09	1.56941e-07
58986	TMEM8A	transmembrane protein 8A	8.21609	8.10359	8.08734	6.90483	7.09883	7.05121	2.16953	1.11738	2.16953	up	2.49631e-11	1.72921e-09
6990	DYNLT3	dynein, light chain, Tctex-type 3	9.99916	10.054	10.0086	10.6687	10.6817	10.7209	-1.59093	-0.669873	1.59093	down	2.37845e-12	3.02556e-10
6385	SDC4	syndecan 4	11.035	11.0661	11.0605	11.7289	11.6716	11.6779	-1.55716	-0.638917	1.55716	down	4.85783e-13	9.36014e-11
4664	NAB1	NGFI-A binding protein 1	5.49432	5.4837	5.66886	6.2703	6.22299	6.45885	-1.7034	-0.76842	1.7034	down	2.2518e-07	2.57434e-06
440275	EIF2AK4	eukaryotic translation initiation factor 2 alpha kinase 4	7.29929	7.25564	7.41105	7.98285	8.11214	8.11574	-1.67975	-0.74825	1.67975	down	2.72812e-09	6.89608e-08
23392	KIAA0368	KIAA0368	3.77197	3.76668	4.13397	4.81336	5.10536	5.16817	-2.20089	-1.13809	2.20089	down	1.33078e-07	1.64858e-06
404672	GTF2H5	general transcription factor IIH subunit 5	4.61303	4.53936	4.70238	5.39006	5.46694	5.25959	-1.68639	-0.75394	1.68639	down	4.74716e-07	4.80301e-06
50626	CYHR1	cysteine/histidine-rich 1	6.82452	6.62665	6.55778	5.87464	6.10329	6.2684	1.50268	0.58754	1.50268	up	2.50699e-05	0.000140976
2073	ERCC5	excision repair cross-complementation group 5	7.52659	7.5242	7.66611	6.94516	6.94481	7.07091	1.50039	0.58534	1.50039	up	1.38224e-07	1.70105e-06
57507	ZNF608	zinc finger protein 608	6.47982	6.41125	6.2954	7.02332	7.10724	7.16577	-1.62821	-0.703287	1.62821	down	4.96367e-08	7.26384e-07
54968	TMEM70	transmembrane protein 70	4.63895	4.46297	4.36558	5.64908	5.67139	5.4844	-2.16214	-1.11246	2.16214	down	7.63748e-09	1.56195e-07
222584	FAM83B	family with sequence similarity 83 member B	4.87762	4.91489	4.93194	5.58015	5.2673	5.65346	-1.5075	-0.592153	1.5075	down	2.85417e-05	0.000157503
11083	DIDO1	death inducer-obliterator 1	6.15824	5.61126	5.87168	7.40313	7.44062	7.49464	-2.96029	-1.56574	2.96029	down	3.00333e-10	1.20831e-08
113246	C12orf57	chromosome 12 open reading frame 57	10.3261	10.3218	10.3921	10.8905	10.9515	10.9847	-1.51107	-0.595567	1.51107	down	2.94839e-11	1.92832e-09
9939	RBM8A	RNA binding motif protein 8A	5.89415	5.75273	5.9692	6.97731	7.11595	7.23385	-2.3571	-1.23701	2.3571	down	2.32397e-10	9.89691e-09
831	CAST	calpastatin	5.60741	5.50111	5.52443	6.0685	6.09676	6.25557	-1.51148	-0.59596	1.51148	down	1.79284e-06	1.46876e-05
51194	IPO11	importin 11	4.0678	3.6991	3.75906	4.54114	4.52992	4.53812	-1.61822	-0.694407	1.61822	down	9.04481e-06	5.86674e-05
51776	ZAK	sterile alpha motif and leucine zipper containing kinase AZK	5.0843	5.1695	5.26908	6.36034	5.76926	6.50793	-2.05369	-1.03822	2.05369	down	3.11204e-06	2.35875e-05
8914	TIMELESS	timeless circadian clock	7.82187	7.7699	7.77236	8.45044	8.39528	8.43292	-1.55635	-0.63817	1.55635	down	8.04195e-10	2.60598e-08
23191	CYFIP1	cytoplasmic FMR1 interacting protein 1	8.75912	8.67428	8.64347	9.41807	9.5127	9.49067	-1.71894	-0.781523	1.71894	down	2.56425e-11	1.75788e-09
3832	KIF11	kinesin family member 11	9.07553	9.05264	8.93064	10.1342	10.174	10.1345	-2.18552	-1.12797	2.18552	down	7.86397e-14	2.61957e-11
102724668	DPY19L1P2	DPY19L1 pseudogene 2	7.91841	7.8958	8.05006	7.23367	7.28116	7.27382	1.61538	0.691873	1.61538	up	3.82086e-09	9.02565e-08
143279	HECTD2	HECT domain containing E3 ubiquitin protein ligase 2	5.24779	5.08272	5.15338	6.19507	6.10712	6.20096	-2.00892	-1.00642	2.00892	down	2.24437e-09	5.86956e-08
6871	TADA2A	transcriptional adaptor 2A	6.40896	6.16483	6.06726	6.836	6.87733	7.05398	-1.63439	-0.708753	1.63439	down	1.05925e-06	9.42418e-06
7185	TRAF1	TNF receptor associated factor 1	4.81631	5.10513	4.59852	5.87887	5.93166	6.14945	-2.21403	-1.14667	2.21403	down	8.01834e-08	1.08271e-06
281	AMYP1	amylase, alpha pseudogene 1	5.35526	5.34506	5.33899	3.75544	4.40974	4.33303	2.26634	1.18037	2.26634	up	3.96963e-07	4.13008e-06
3419	IDH3A	isocitrate dehydrogenase 3 (NAD+) alpha	8.5661	8.5318	8.57071	7.90718	7.96398	7.89641	1.55152	0.63368	1.55152	up	6.57006e-10	2.22437e-08
79047	KCTD15	potassium channel tetramerization domain containing 15	6.70247	6.40176	6.30074	7.42323	7.35087	7.49639	-1.93881	-0.955173	1.93881	down	2.37225e-08	3.98488e-07
3678	ITGA5	integrin alpha 5	6.00082	5.83197	6.10765	6.94395	6.85064	6.91285	-1.89518	-0.922333	1.89518	down	6.30455e-09	1.34754e-07
169200	TMEM64	transmembrane protein 64	5.04068	4.86395	4.67834	5.66714	5.58254	5.61298	-1.69337	-0.759897	1.69337	down	1.05249e-06	9.37886e-06
9526	MPDU1	mannose-P-dolichol utilization defect 1	7.44782	7.3773	7.59541	8.77092	8.86934	8.7719	-2.51497	-1.33054	2.51497	down	9.01146e-13	1.49457e-10
10053	AP1M2	adaptor-related protein complex 1 mu 2 subunit	9.09096	9.04889	9.2029	8.21032	8.01394	8.295	1.92008	0.941163	1.92008	up	4.25433e-10	1.58466e-08
55137	FIGN	fidgetin	6.39092	6.61858	6.6148	7.10425	7.29531	7.21122	-1.58245	-0.66216	1.58245	down	3.47627e-07	3.69701e-06
9553	MRPL33	mitochondrial ribosomal protein L33	8.64811	8.63855	8.75047	6.66936	6.66211	6.83904	3.87861	1.95554	3.87861	up	6.11379e-15	5.86133e-12
10144	FAM13A	family with sequence similarity 13 member A	4.27554	4.20096	3.87868	4.68628	4.67648	5.11461	-1.63285	-0.707397	1.63285	down	7.46468e-05	0.000364354
26227	PHGDH	phosphoglycerate dehydrogenase	9.69094	9.52296	9.5113	10.4247	10.4109	10.4332	-1.79984	-0.84787	1.79984	down	9.09299e-12	8.11063e-10
55148	UBR7	ubiquitin protein ligase E3 component n-recognin 7 (putative)	6.21437	6.04887	6.0919	6.91154	6.98761	6.82764	-1.72973	-0.79055	1.72973	down	1.72185e-08	3.05281e-07
7171	TPM4	tropomyosin 4	5.03593	4.9042	5.05738	6.74935	6.61129	6.90391	-3.37685	-1.75568	3.37685	down	4.78049e-12	5.1765e-10
205860	TRIML2	tripartite motif family like 2	8.84229	8.72539	8.85171	8.15501	8.04141	8.28487	1.56486	0.646033	1.56486	up	2.22894e-08	3.78949e-07
2820	GPD2	glycerol-3-phosphate dehydrogenase 2	7.83941	7.76143	7.71622	8.95398	8.96661	8.97848	-2.28787	-1.194	2.28787	down	1.53695e-13	4.44212e-11
2932	GSK3B	glycogen synthase kinase 3 beta	8.24967	8.09245	8.24577	7.46831	7.37723	7.59366	1.64288	0.71623	1.64288	up	1.38835e-08	2.55367e-07
159	ADSS	adenylosuccinate synthase	8.87295	8.86731	8.99182	10.0163	9.94184	9.96372	-2.08966	-1.06327	2.08966	down	2.13059e-13	5.33421e-11
5069	PAPPA	pregnancy-associated plasma protein A, pappalysin 1	5.91861	5.93454	6.05914	6.90489	6.6857	6.88871	-1.8096	-0.85567	1.8096	down	1.67458e-08	2.98381e-07
54463	FAM134B	family with sequence similarity 134 member B	5.44733	5.46029	5.22729	4.55419	4.52992	4.63184	1.74875	0.80632	1.74875	up	2.52546e-07	2.82333e-06
127845	GOLT1A	golgi transport 1A	5.99705	5.87915	5.8442	5.19291	5.37218	5.37848	1.50762	0.592277	1.50762	up	3.83695e-06	2.82168e-05
26499	PLEK2	pleckstrin 2	10.0629	10.0101	9.99613	10.5588	10.5942	10.6778	-1.50231	-0.587187	1.50231	down	1.09574e-10	5.45844e-09
7741	ZSCAN26	zinc finger and SCAN domain containing 26	5.26086	5.32288	5.47411	6.12902	6.18266	6.04774	-1.70195	-0.76719	1.70195	down	1.33048e-07	1.64858e-06
100505385	IQCJ-SCHIP1	IQCJ-SCHIP1 readthrough	7.14491	7.08129	7.13102	7.77755	7.68594	7.88056	-1.58258	-0.662277	1.58258	down	1.65802e-08	2.96216e-07
51400	PPME1	protein phosphatase methylesterase 1	9.60308	9.61051	9.82404	8.85012	8.74935	8.83292	1.82565	0.868413	1.82565	up	1.47062e-10	6.78571e-09
221035	REEP3	receptor accessory protein 3	5.0441	4.93715	5.22842	5.94806	5.97973	6.06672	-1.90301	-0.92828	1.90301	down	3.30384e-08	5.21333e-07
90459	ERI1	exoribonuclease 1	7.84435	7.82295	7.80101	8.54956	8.57104	8.54806	-1.66261	-0.73345	1.66261	down	7.03946e-11	3.88078e-09
348180	CTU2	cytosolic thiouridylase subunit 2 homolog (S. pombe)	9.61118	9.62129	9.63688	8.99513	8.89546	8.94252	1.60075	0.678747	1.60075	up	3.2223e-11	2.05949e-09
26523	AGO1	argonaute 1, RISC catalytic component	7.447	7.44594	7.47916	8.29306	8.31615	8.28087	-1.78921	-0.839327	1.78921	down	2.6335e-11	1.78782e-09
3320	HSP90AA1	heat shock protein 90kDa alpha family class A member 1	9.69189	9.66497	9.69189	9.01006	8.96053	8.97069	1.62731	0.70249	1.62731	up	7.894e-12	7.40107e-10
114885	OSBPL11	oxysterol binding protein like 11	7.47875	7.36259	7.33173	8.10378	8.09364	8.00578	-1.59849	-0.67671	1.59849	down	5.19181e-09	1.14777e-07
91782	CHMP7	charged multivesicular body protein 7	6.8742	6.81493	6.91392	6.13124	6.25454	6.2081	1.59077	0.669723	1.59077	up	5.35081e-08	7.74021e-07
10285	SMNDC1	survival motor neuron domain containing 1	6.7803	6.57541	6.63481	6.06556	5.96707	6.15296	1.51744	0.601643	1.51744	up	1.28698e-06	1.11254e-05
1994	ELAVL1	ELAV like RNA binding protein 1	4.18916	4.04234	3.9187	4.85874	4.71279	4.79014	-1.66689	-0.737157	1.66689	down	1.65539e-06	1.37507e-05
23636	NUP62	nucleoporin 62kDa	8.77833	8.78253	8.70125	9.34689	9.27633	9.3956	-1.50063	-0.58557	1.50063	down	1.23875e-09	3.68598e-08
493861	EID3	EP300 interacting inhibitor of differentiation 3	6.80457	6.5626	6.60614	6.06668	6.00068	6.04988	1.53548	0.61869	1.53548	up	7.80248e-07	7.28831e-06
2967	GTF2H3	general transcription factor IIH subunit 3	6.2573	6.03532	6.1783	5.68079	5.28353	5.49976	1.58991	0.668947	1.58991	up	7.28875e-06	4.87575e-05
5076	PAX2	paired box 2	6.51426	6.37964	6.39972	5.47197	5.88293	5.63292	1.70362	0.7686	1.70362	up	9.2205e-07	8.37408e-06
2736	GLI2	GLI family zinc finger 2	5.19738	5.20667	5.27976	5.76584	5.79839	6.01554	-1.5497	-0.631987	1.5497	down	2.48385e-06	1.94255e-05
54892	NCAPG2	non-SMC condensin II complex subunit G2	6.37414	6.26208	6.53628	7.18948	7.11367	6.88898	-1.59462	-0.67321	1.59462	down	1.51981e-06	1.27784e-05
7849	PAX8	paired box 8	6.92157	6.92788	7.01404	6.15309	6.10008	6.2319	1.73244	0.792807	1.73244	up	6.27225e-09	1.34161e-07
160335	TMTC2	transmembrane and tetratricopeptide repeat containing 2	5.4031	5.33699	5.33548	4.47467	4.58858	4.62836	1.73466	0.794653	1.73466	up	1.18552e-07	1.49356e-06
441521	CT45A5	cancer/testis antigen family 45, member A5	7.17178	7.35035	7.34255	6.59623	6.57423	6.45535	1.67747	0.74629	1.67747	up	2.21146e-08	3.76466e-07
9825	SPATA2	spermatogenesis associated 2	6.38666	6.44929	6.51379	7.1953	7.16577	7.21719	-1.67347	-0.74284	1.67347	down	5.54232e-09	1.20828e-07
132864	CPEB2	cytoplasmic polyadenylation element binding protein 2	7.493	7.41858	7.49121	6.65464	6.68993	6.86719	1.65903	0.730343	1.65903	up	1.76071e-08	3.10351e-07
10200	MPHOSPH6	M-phase phosphoprotein 6	8.71119	8.57373	8.63929	9.45478	9.43175	9.48129	-1.75873	-0.814537	1.75873	down	1.20652e-11	1.00515e-09
2182	ACSL4	acyl-CoA synthetase long-chain family member 4	6.22482	6.13644	6.34001	5.52596	5.58637	5.81337	1.50719	0.591857	1.50719	up	8.19302e-06	5.39526e-05
57587	CFAP97	cilia and flagella associated protein 97	7.7599	7.64509	7.62944	8.29304	8.23726	8.27771	-1.50649	-0.591193	1.50649	down	9.53935e-09	1.88319e-07
1999	ELF3	E74-like factor 3 (ets domain transcription factor, epithelial-specific )	7.9324	7.87704	7.83816	8.6095	8.62955	8.57828	-1.65089	-0.723243	1.65089	down	1.54559e-10	7.09466e-09
54621	VSIG10	V-set and immunoglobulin domain containing 10	5.69378	5.71592	5.82209	6.44444	6.43593	6.40643	-1.60771	-0.685003	1.60771	down	8.92984e-08	1.18383e-06
10535	RNASEH2A	ribonuclease H2 subunit A	7.6717	7.56049	7.65189	6.97099	6.98828	7.05879	1.53901	0.622007	1.53901	up	2.04328e-08	3.51644e-07
9454	HOMER3	homer scaffolding protein 3	8.89807	9.01367	9.14044	8.37424	8.38692	8.41424	1.54285	0.625593	1.54285	up	1.05285e-08	2.03965e-07
11118	BTN3A2	butyrophilin, subfamily 3, member A2	5.87911	5.84463	5.91694	6.61021	6.73062	6.59249	-1.69844	-0.764213	1.69844	down	1.91425e-08	3.33082e-07
353376	TICAM2	toll-like receptor adaptor molecule 2	6.20888	5.87797	5.97296	5.37871	5.17719	5.2904	1.66767	0.737837	1.66767	up	1.30702e-06	1.1264e-05
9926	LPGAT1	lysophosphatidylglycerol acyltransferase 1	9.40373	9.19343	9.27367	10.032	10.0718	10.1045	-1.71612	-0.779153	1.71612	down	8.91007e-11	4.66971e-09
10294	DNAJA2	DnaJ heat shock protein family (Hsp40) member A2	10.2494	10.1793	10.2611	9.51206	9.51703	9.57809	1.61801	0.694217	1.61801	up	9.77031e-12	8.4965e-10
427	ASAH1	N-acylsphingosine amidohydrolase (acid ceramidase) 1	4.1431	3.97307	4.00691	4.4403	4.93182	5.01925	-1.68891	-0.756097	1.68891	down	3.70552e-05	0.000197495
388610	TRNP1	TMF1-regulated nuclear protein 1	9.65998	9.62122	9.69308	8.93748	9.03405	9.04645	1.57145	0.6521	1.57145	up	1.26821e-10	6.08664e-09
84919	PPP1R15B	protein phosphatase 1 regulatory subunit 15B	8.64297	8.57234	8.62053	8.03573	8.04662	7.94795	1.51766	0.601847	1.51766	up	2.3458e-09	6.0742e-08
51155	HN1	hematological and neurological expressed 1	9.39282	9.45352	9.48642	10.0628	10.0874	10.0757	-1.54871	-0.631063	1.54871	down	2.92006e-11	1.91298e-09
51635	DHRS7	dehydrogenase/reductase (SDR family) member 7	8.93794	8.96871	9.01027	8.34441	8.39999	8.31507	1.53597	0.61915	1.53597	up	5.31494e-10	1.87367e-08
558	AXL	AXL receptor tyrosine kinase	11.4632	11.4361	11.4402	10.7631	10.7206	10.6907	1.64907	0.721657	1.64907	up	1.91915e-13	5.05738e-11
441519	CT45A3	cancer/testis antigen family 45, member A3	7.17178	7.35035	7.34255	6.59623	6.57423	6.45535	1.67747	0.74629	1.67747	up	2.21146e-08	3.76466e-07
10772	SRSF10	serine/arginine-rich splicing factor 10	6.39526	6.40888	6.19124	7.2519	7.22338	7.2916	-1.89715	-0.923833	1.89715	down	1.70333e-09	4.71168e-08
157570	ESCO2	establishment of sister chromatid cohesion N-acetyltransferase 2	8.03559	7.89885	7.95964	9.133	9.13079	9.13021	-2.24488	-1.16664	2.24488	down	1.76434e-13	4.87718e-11
375444	C5orf34	chromosome 5 open reading frame 34	8.32076	8.29388	8.31176	9.01322	9.03557	9.08681	-1.66601	-0.7364	1.66601	down	2.70637e-11	1.82156e-09
8202	NCOA3	nuclear receptor coactivator 3	7.06272	6.96293	7.30422	6.05398	6.04263	6.01513	2.10338	1.07271	2.10338	up	1.8001e-09	4.90343e-08
23097	CDK19	cyclin-dependent kinase 19	7.26293	7.25472	7.12923	8.00492	8.07638	8.10953	-1.79998	-0.847983	1.79998	down	2.78681e-10	1.13925e-08
5983	RFC3	replication factor C subunit 3	9.25222	9.13347	9.10831	9.76161	9.76175	9.76864	-1.51502	-0.599333	1.51502	down	4.78508e-10	1.72716e-08
133686	NADK2	NAD kinase 2, mitochondrial	7.68697	7.46014	7.54512	8.31395	8.32371	8.42398	-1.72884	-0.789803	1.72884	down	1.95283e-09	5.24113e-08
440224	CXADRP3	coxsackie virus and adenovirus receptor pseudogene 3	7.00498	6.9279	7.10445	6.33682	6.45578	6.4256	1.52243	0.606377	1.52243	up	2.61203e-07	2.90359e-06
9474	ATG5	autophagy related 5	5.34884	5.08405	5.35447	6.46328	6.62263	6.72615	-2.53426	-1.34157	2.53426	down	5.14955e-10	1.82849e-08
134266	GRPEL2	GrpE-like 2, mitochondrial (E. coli)	8.85098	8.87796	8.73909	9.50232	9.55187	9.56364	-1.6433	-0.7166	1.6433	down	8.28581e-11	4.41315e-09
728819	C1GALT1C1L	C1GALT1-specific chaperone 1 like	4.68129	4.44478	4.35902	5.28572	5.22977	5.48062	-1.78634	-0.837007	1.78634	down	8.18607e-07	7.5907e-06
51752	ERAP1	endoplasmic reticulum aminopeptidase 1	7.66908	7.67938	7.69644	8.328	8.24113	8.31695	-1.53021	-0.613727	1.53021	down	2.29086e-09	5.96902e-08
