# Supplementary material for: In leukemia, knock-down of the death inducer-obliterator gene would inhibit the proliferation of endothelial cells by inhibiting the expression of CDK6 and CCND1
Source: PeerJ. 2022 Feb 1;10:e12832. doi: 10.7717/peerj.12832 (PMC8815367; doi:10.7717/peerj.12832)
Supplement: Supplemental Information 8 [file peerj-10-12832-s008.xlsx]

## Sheet: Canonical_Pathway
Ingenuity Canonical Pathways	-log(p-value)	Ratio	z-score	Molecules	Counts of AntibodyList
Hereditary Breast Cancer Signaling	5.24	0.174	NaN	BARD1,CCND1,PTEN,HDAC11,AKT3,BRCA1,POLR2L,POLR2I,HDAC9,CDC25C,HDAC4,HDAC8,PIK3C2A,FGFR1,CDK6,SMARCE1,RFC5,PIK3R3,SMARCA2,H2AFX,MRE11,SMARCC1,FANCA,RFC3,PHF10	5
Insulin Receptor Signaling	4.9	0.17	0.209	PRKACB,JAK1,BAD,PIK3C2A,FGFR1,PRKAR2A,PDPK1,CRK,EIF4E,PTPRF,GRB10,PTEN,PIK3R3,MTOR,PRKAR2B,FOXO1,PPP1R7,MAPK3,FOXO3,EIF2B1,ASIC1,AKT3,STX4,GSK3B	8
IGF-1 Signaling	4.86	0.189	-0.277	PRKACB,IGFBP6,IGFBP4,NEDD4,YWHAG,JAK1,PIK3C2A,BAD,FGFR1,PRKAR2A,YWHAZ,PDPK1,GRB10,PIK3R3,CSNK2A2,PRKAR2B,FOXO1,MAPK3,FOXO3,AKT3	4
Neuregulin Signaling	4.36	0.193	-0.277	BAD,ITGA2,ITGA5,PDPK1,ERBB3,CRK,PTEN,PIK3R3,NRG1,MTOR,MAPK3,TGFA,HSP90AA1,PRKCE,AKT3,EREG,EGFR	8
PI3K/AKT Signaling	4.28	0.168	-1.147	YWHAG,JAK1,BAD,ITGA2,YWHAZ,ITGA5,PDPK1,CCND1,EIF4E,PPP2R5A,PTEN,PIK3R3,MTOR,FOXO1,MAPK3,FOXO3,HSP90AA1,AKT3,PTGS2,GSK3B,PPP2R1B	11
Cell Cycle: G1/S Checkpoint Regulation	4.16	0.212	1.387	HDAC9,CCNE2,HDAC4,HDAC8,PAK1IP1,CDK6,CCND1,SKP2,NRG1,CCND2,FOXO1,HDAC11,GSK3B,CDC25A	5
HER-2 Signaling in Breast Cancer	3.82	0.182	NaN	CCNE2,PIK3C2A,BAD,FGFR1,CDK6,ERBB3,CCND1,ITGB3,PIK3R3,NRG1,FOXO1,CDC42,PRKCE,AKT3,GSK3B,EGFR	7
Molecular Mechanisms of Cancer	3.79	0.114	NaN	PRKACB,JAK1,BAD,WNT3,CDK16,GNA11,CRK,SMAD5,CCND1,LAMTOR3,BBC3,HHAT,MAPK3,PRKCE,AKT3,GSK3B,HIPK2,BRCA1,CDC25A,SMAD2,PMAIP1,CCNE2,CDC25C,PIK3C2A,FGFR1,ITGA2,RALB,SMAD6,CDK6,PRKAR2A,ITGA5,RALBP1,RAP1A,PIK3R3,GNAI3,CCND2,PRKAR2B,RABIF,FOXO1,CDC42,APH1B,ARHGEF18,CDK19,FNBP1,WNT5A	15
ERK/MAPK Signaling	3.62	0.135	-2.041	PRKACB,BAD,CRK,EIF4E,LAMTOR3,ELF3,PPP1R7,MAPK3,PRKCE,PLA2G12A,ETS1,YWHAG,PIK3C2A,FGFR1,ITGA2,YWHAZ,PRKAR2A,ITGA5,CREB5,RAP1A,PPP2R5A,PIK3R3,PLA2G4A,PRKAR2B,H3F3A/H3F3B,RPS6KA1,PPP2R1B	6
p53 Signaling	3.56	0.162	-0.535	HDAC9,PMAIP1,PIK3C2A,JMY,MED1,FGFR1,TIGAR,CCND1,BIRC5,PTEN,PIK3R3,CCND2,BBC3,THBS1,AKT3,GSK3B,HIPK2,BRCA1	7
Huntington's Disease Signaling	3.4	0.124	-0.277	GNA11,GNB5,PDPK1,NGF,VTI1B,TGM2,GNB4,HSPA4,MTOR,HDAC11,MAPK3,AKT3,PRKCE,BET1L,NAPB,POLR2L,EGFR,GNG4,POLR2I,HDAC9,HDAC4,HDAC8,PIK3C2A,PSMF1,GLS,FGFR1,RCOR1,CREB5,DNM1,PIK3R3,PSME4	4
Prostate Cancer Signaling	3.32	0.165	NaN	CCNE2,PIK3C2A,BAD,SRD5A1,FGFR1,PDPK1,CREB5,CCND1,PTEN,PIK3R3,MTOR,FOXO1,MAPK3,HSP90AA1,AKT3,GSK3B	8
CDP-diacylglycerol Biosynthesis I	3.21	0.292	NaN	GPAM,AGPAT5,ABHD5,LPCAT3,GPAT3,LPGAT1,CDS2	0
PTEN Signaling	3.19	0.151	1.213	BAD,FGFR1,ITGA2,ITGA5,PDPK1,CCND1,IGF2R,PTEN,PIK3R3,CSNK2A2,GHR,FOXO1,CDC42,MAPK3,FOXO3,AKT3,GSK3B,EGFR	8
Glucocorticoid Receptor Signaling	3.14	0.112	NaN	PRKACB,JAK1,NFATC3,CCL5,NR3C1,TAF13,HMGB1,CXCL3,HSPA4,PCK2,BAG1,MAPK3,FOXO3,PRKAA2,GTF2H5,AKT3,POLR2L,GTF2H3,POLR2I,SMAD2,PIK3C2A,MED1,FGFR1,SMARCE1,KRT80,TSG101,NCOA3,PIK3R3,KRT8,TAF5,SMARCA2,FKBP4,NFATC2,HSP90AA1,PTGS2,SMARCC1,CSF2,PHF10	9
Androgen Signaling	3.1	0.153	0	POLR2I,PRKACB,GNG4,GNA11,PRKAR2A,GNB5,CCND1,GNB4,GNAI3,HSPA4,PRKAR2B,MAPK3,GTF2H5,HSP90AA1,PRKCE,POLR2L,GTF2H3	3
Role of Tissue Factor in Cancer	3.01	0.146	NaN	PIK3C2A,FGFR1,GNA11,ITGA6,VEGFC,F3,EIF4E,ITGB3,PTEN,PIK3R3,MTOR,CFL2,CDC42,MAPK3,AKT3,RPS6KA1,CSF2,EGFR	9
Hypoxia Signaling in the Cardiovascular System	3.01	0.173	0.447	UBE2A,UBE2R2,NQO1,CREB5,UBE2F,PTEN,UBE2D2,UBE2J1,EDN1,HIF1AN,UBE2K,HSP90AA1,VHL	2
Phosphatidylglycerol Biosynthesis II (Non-plastidic)	2.98	0.269	NaN	GPAM,AGPAT5,ABHD5,LPCAT3,GPAT3,LPGAT1,CDS2	0
Protein Ubiquitination Pathway	2.97	0.117	NaN	UBE2A,CDC23,DNAJC15,UBE4A,UBE2F,HSPA4,BAG1,USP42,USP47,UBE2K,NEDD4L,BRCA1,NEDD4,MED20,DNAJC27,DNAJC19,UBE2R2,PSMD5,USP1,DNAJB9,UBE3A,SKP2,UBE2D2,UBE2J1,HSPA13,HSP90AA1,USP46,SMURF2,USP37,USP25,VHL	2
Regulation of eIF4 and p70S6K Signaling	2.9	0.134	-0.302	EIF4EBP2,PIK3C2A,FGFR1,ITGA2,ITGA5,PDPK1,EIF2S1,EIF4E,EIF2A,PPP2R5A,EIF2S2,PIK3R3,MTOR,MAPK3,PAIP1,EIF2B1,AKT3,RPS2,AGO1,PPP2R1B,AGO4	5
Amyloid Processing	2.85	0.196	NaN	PRKACB,CSNK2A2,PRKAR2B,MAPK3,PRKAR2A,MARK1,AKT3,APH1B,PRKCE,GSK3B	2
ErbB2-ErbB3 Signaling	2.83	0.174	-0.577	NRG1,PIK3R3,BAD,FOXO1,PIK3C2A,MAPK3,FGFR1,PDPK1,ERBB3,GSK3B,CCND1,PTEN	6
G Beta Gamma Signaling	2.82	0.159	-0.577	PRKACB,GNG4,GNA11,PRKAR2A,GNB5,PDPK1,GNB4,GNAI3,PRKAR2B,CDC42,MAPK3,PRKCE,AKT3,EGFR	3
Colorectal Cancer Metastasis Signaling	2.81	0.117	-3	PRKACB,IL6ST,JAK1,WNT3,BAD,MMP3,MMP14,GNB5,CCND1,GNB4,APPL1,MAPK3,AKT3,GSK3B,EGFR,GNG4,SMAD2,PIK3C2A,GRK3,FGFR1,PRKAR2A,VEGFC,BIRC5,TLR2,PIK3R3,PRKAR2B,PTGS2,FNBP1,WNT5A	14
ErbB Signaling	2.8	0.153	NaN	PIK3C2A,FGFR1,PDPK1,ERBB3,PIK3R3,NRG1,MTOR,FOXO1,CDC42,MAPK3,TGFA,PRKCE,GSK3B,EREG,EGFR	7
FAK Signaling	2.76	0.152	NaN	ARHGAP26,PIK3C2A,ASAP1,FGFR1,HMMR,ITGA2,ITGA5,PDPK1,CRK,PTEN,PIK3R3,MAPK3,AKT3,VCL,EGFR	4
Cyclins and Cell Cycle Regulation	2.74	0.162	-2.121	HDAC9,CCNE2,HDAC4,CCND2,HDAC8,HDAC11,CDK6,GSK3B,PPP2R1B,CCND1,PPP2R5A,SKP2,CDC25A	5
Pancreatic Adenocarcinoma Signaling	2.72	0.142	-2.5	SMAD2,NAPEPLD,JAK1,PIK3C2A,BAD,FGFR1,VEGFC,CCND1,RALBP1,BIRC5,PIK3R3,CDC42,MAPK3,TGFA,AKT3,PTGS2,EGFR	12
Macropinocytosis Signaling	2.69	0.16	-1.414	PIK3C2A,FGFR1,ANKFY1,USP6NL,ITGA5,NGF,PDGFB,ITGB3,PIK3R3,MET,RAB5A,CDC42,PRKCE	3
IL-7 Signaling Pathway	2.67	0.154	-2.111	JAK1,PIK3C2A,BAD,FGFR1,PDPK1,CCND1,PIK3R3,MET,FOXO1,MAPK3,FOXO3,AKT3,GSK3B,CDC25A	7
Telomerase Signaling	2.67	0.144	-1.155	ETS1,HDAC9,HDAC4,PIK3C2A,HDAC8,FGFR1,PDPK1,PPP2R5A,PIK3R3,ELF3,MAPK3,HDAC11,HSP90AA1,AKT3,PPP2R1B,EGFR	5
Ovarian Cancer Signaling	2.61	0.132	NaN	PRKACB,WNT3,PIK3C2A,FGFR1,PRKAR2A,VEGFC,CCND1,PTEN,PIK3R3,MTOR,PRKAR2B,EDN1,MAPK3,AKT3,PTGS2,GSK3B,BRCA1,EGFR,WNT5A	10
Endometrial Cancer Signaling	2.6	0.172	NaN	PIK3R3,BAD,PIK3C2A,MAPK3,FGFR1,FOXO3,AKT3,PDPK1,GSK3B,CCND1,PTEN	6
Renal Cell Carcinoma Signaling	2.59	0.157	-1.897	ETS1,PIK3C2A,FGFR1,CRK,RAP1A,PDGFB,PIK3R3,MET,CDC42,MAPK3,TGFA,AKT3,VHL	7
PXR/RXR Activation	2.54	0.169	NaN	PRKACB,PRKAR2B,FOXO1,PCK2,FOXO3,PRKAR2A,AKT3,CES2,ABCC3,NR3C1,PAPSS2	1
Mitotic Roles of Polo-Like Kinase	2.49	0.167	-1.342	CDC25C,PRC1,CDC7,HSP90AA1,CDC23,PPP2R1B,CDC27,KIF11,PPP2R5A,CDC25A,SMC1A	4
Sumoylation Pathway	2.45	0.146	1.414	SERBP1,ETS1,RAN,RCOR1,RFC5,NR3C1,SP100,ARHGDIB,TDG,RCC1,SUMO2,ISG20,FNBP1,RFC3	3
AMPK Signaling	2.45	0.116	0.5	PRKACB,PIK3C2A,FGFR1,STRADA,SMARCE1,PRKAR2A,PDPK1,CREB5,CCND1,ELAVL1,PPP2R5A,PIK3R3,MTOR,PRKAR2B,PCK2,FOXO1,SMARCA2,FOXO3,PRKAA2,AKT3,AK4,PPM1A,SMARCC1,PPP2R1B,PHF10	4
Non-Small Cell Lung Cancer Signaling	2.42	0.156	-0.905	PIK3R3,BAD,PIK3C2A,MAPK3,FGFR1,FOXO3,CDK6,TGFA,AKT3,PDPK1,CCND1,EGFR	7
Integrin Signaling	2.37	0.114	-1.225	ACTR2,ARHGAP26,PIK3C2A,ASAP1,FGFR1,WASL,RALB,ITGA2,ITGA6,ITGA5,CRK,RAP1A,PDGFB,ITGB3,PTEN,ARHGAP5,PIK3R3,ARF3,CDC42,MAPK3,AKT3,GSK3B,VCL,TSPAN6,FNBP1	7
Clathrin-mediated Endocytosis Signaling	2.29	0.116	NaN	MYO6,ACTR2,SH3BP4,EPN1,PIK3C2A,PICALM,FGFR1,WASL,VEGFC,ITGA5,PCYOX1,TSG101,PDGFB,ITGB3,MET,PIK3R3,DNM1,CSNK2A2,RAB5A,CDC42,TFRC,SERPINA1,CLU	6
Osteoarthritis Pathway	2.28	0.114	-1.091	SMAD2,HDAC4,EPAS1,GLI2,DDIT4,MMP3,FGFR1,ITGA2,SMAD6,VEGFC,ITGA5,SDC4,SMAD5,CREB5,TLR2,HMGB1,MTOR,ELF3,RUNX2,FOXO3,PRKAA2,PTGS2,JAG1,IL1RAP	6
Tight Junction Signaling	2.23	0.12	NaN	PRKACB,CLDN11,TJP2,VAPA,NECTIN3,PRKAR2A,VTI1B,PPP2R5A,PTEN,CPSF6,PRKAR2B,CLDN4,CDC42,CLDN1,AKT3,STX4,VCL,PPP2R1B,BET1L,NAPB	3
Epithelial Adherens Junction Signaling	2.19	0.123	NaN	ACTR2,EPN1,FGFR1,NECTIN3,WASL,CRK,RAP1A,CLIP1,PTEN,MET,NOTCH2,TUBA1A,CDC42,AKT3,SSX2IP,VCL,ACVR2A,EGFR	6
VEGF Signaling	2.18	0.136	-1.414	PIK3C2A,BAD,FGFR1,VEGFC,EIF2S1,EIF2S2,ELAVL1,PIK3R3,FOXO1,MAPK3,FOXO3,EIF2B1,AKT3,VCL	5
Glioma Signaling	2.16	0.132	-1.604	PIK3C2A,FGFR1,CDK6,IGF2R,CCND1,PDGFB,IDH1,PTEN,PIK3R3,MTOR,MAPK3,TGFA,PRKCE,AKT3,EGFR	8
Protein Kinase A Signaling	2.14	0.0975	-0.522	PRKACB,NAPEPLD,BAD,PTPN2,NFATC3,GNB5,CDC23,PTPRF,PTEN,GNB4,DUSP5,DUSP3,HHAT,PTPRJ,PPP1R7,MAPK3,H1FX,PRKCE,GSK3B,DUSP12,CDC25A,GNG4,CDC25C,PTPRK,YWHAG,YWHAZ,PRKAR2A,PYGL,CREB5,RAP1A,GNAI3,H3F3A/H3F3B,PRKAR2B,AKAP10,NFATC2,PTGS2,EBI3,CDC27,AKAP1	9
HGF Signaling	2.13	0.13	-1.732	ETS1,PIK3C2A,FGFR1,ITGA2,ITGA5,RAP1A,CCND1,PIK3R3,MET,ELF3,CDC42,MAPK3,PRKCE,AKT3,PTGS2	8
Superpathway of Serine and Glycine Biosynthesis I	2.11	0.429	NaN	PSAT1,PHGDH,SHMT1	0
Cholesterol Biosynthesis I	2.11	0.308	NaN	SQLE,LSS,SC5D,LBR	0
Cholesterol Biosynthesis II (via 24,25-dihydrolanosterol)	2.11	0.308	NaN	SQLE,LSS,SC5D,LBR	0
Cholesterol Biosynthesis III (via Desmosterol)	2.11	0.308	NaN	SQLE,LSS,SC5D,LBR	0
ERK5 Signaling	2.01	0.152	-1.897	IL6ST,YWHAG,BAD,FOXO3,YWHAZ,RPS6KA1,NGF,CREB5,MAP2K5,EGFR	4
UVB-Induced MAPK Signaling	2.01	0.152	-1	PIK3R3,MTOR,H3F3A/H3F3B,BAD,PIK3C2A,MAPK3,FGFR1,PRKCE,EIF4E,EGFR	6
Ephrin Receptor Signaling	2.01	0.114	-0.832	GNG4,ACTR2,GNA11,ITGA2,WASL,GNB5,VEGFC,ITGA5,CRK,CREB5,RAP1A,PDGFB,GNB4,GNAI3,CFL2,CDC42,SDC2,MAPK3,AKT3,EPHA2	5
Role of CHK Proteins in Cell Cycle Checkpoint Control	1.97	0.158	-0.816	CDC25C,MRE11,RFC5,BRCA1,PPP2R1B,PPP2R5A,RAD1,CDC25A,RFC3	1
3-phosphoinositide Biosynthesis	1.97	0.11	NaN	CDC25C,PIK3C2A,MTMR9,PTPN2,FGFR1,PIP4K2B,ERBB3,PXYLP1,PTPRF,PPP2R5A,PTEN,MET,PIK3R3,DUSP5,PTPRJ,PPP1R7,PPM1H,PRUNE1,DUSP12,PIP4K2C,EGFR,CDC25A	6
p70S6K Signaling	1.94	0.121	-1.604	YWHAG,JAK1,PIK3C2A,BAD,FGFR1,YWHAZ,PDPK1,PPP2R5A,PIK3R3,GNAI3,MTOR,MAPK3,PRKCE,AKT3,PPP2R1B,EGFR	6
Cell Cycle: G2/M DNA Damage Checkpoint Regulation	1.89	0.163	1.134	CDC25C,YWHAG,YWHAZ,BORA,RPS6KA1,HIPK2,BRCA1,SKP2	2
Agrin Interactions at Neuromuscular Junction	1.88	0.145	-1	NRG1,CDC42,MAPK3,ITGA2,ITGA6,ITGA5,ERBB3,DAG1,ITGB3,EGFR	3
NRF2-mediated Oxidative Stress Response	1.86	0.109	-1	PIK3C2A,FGFR1,NQO1,DNAJC19,DNAJC15,DNAJB9,CUL3,PIK3R3,ERP29,MAPK3,CAT,UBE2K,PRKCE,DNAJA2,GSK3B,NFE2L2,HACD3,ENC1,MGST3,MAP2K5,FTH1	5
Sirtuin Signaling Pathway	1.85	0.0997	-2.6	ABCA1,MTOR,WRN,PCK2,H1FX,MAPK3,GABARAPL1,FOXO3,PRKAA2,CLOCK,ATG4A,NDUFS2,GSK3B,NFE2L2,POLR1D,ATG5,NEDD4,EPAS1,TIMM44,NDUFS7,GLS,TOMM20,NQO1,MAPK6,TIMM17A,TUBA1A,H3F3A/H3F3B,FOXO1,CPS1	4
Leucine Degradation I	1.77	0.333	NaN	BCAT1,AUH,ACADM	0
Folate Transformations I	1.77	0.333	NaN	MTHFR,MTHFD2,SHMT1	0
EIF2 Signaling	1.77	0.104	-1.807	EIF2AK4,RPL22,ATF3,PIK3C2A,FGFR1,PDPK1,RPL7L1,EIF2S1,CCND1,EIF4E,EIF2A,EIF2S2,PIK3R3,MAPK3,PAIP1,EIF5,EIF2B1,AKT3,RPL37,GSK3B,RPS2,AGO1,AGO4	6
IL-8 Signaling	1.76	0.107	-2.183	GNG4,NAPEPLD,PIK3C2A,FGFR1,GNB5,VEGFC,CCND1,ITGB3,IRAK1,PIK3R3,RAB11FIP2,GNB4,GNAI3,MTOR,CCND2,MAPK3,PRKCE,AKT3,PTGS2,FNBP1,EGFR	9
Docosahexaenoic Acid (DHA) Signaling	1.74	0.154	NaN	PIK3R3,BAD,FOXO1,PIK3C2A,FGFR1,AKT3,PDPK1,GSK3B	3
Estrogen Receptor Signaling	1.73	0.117	NaN	POLR2I,MED20,MED1,HNRNPD,TAF13,NR3C1,NCOA3,H3F3A/H3F3B,PCK2,TAF5,RUNX2,MAPK3,GTF2H5,POLR2L,GTF2H3	2
Axonal Guidance Signaling	1.72	0.0907	NaN	PRKACB,ERAP2,GLI2,MMP3,NTN4,WNT3,NFATC3,WASL,GNA11,GNB5,CRK,NGF,EIF4E,GNB4,CFL2,SDC2,MAPK3,PRKCE,AKT3,GSK3B,GNG4,ACTR2,PAPPA,PIK3C2A,FGFR1,ITGA2,PRKAR2A,ITGA5,VEGFC,RAP1A,PDGFB,PIK3R3,MET,GNAI3,PRKAR2B,TUBA1A,CDC42,NFATC2,EPHA2,NRP1,WNT5A	13
Chronic Myeloid Leukemia Signaling	1.71	0.123	NaN	HDAC9,HDAC4,PIK3C2A,HDAC8,BAD,FGFR1,CDK6,CRK,CCND1,PIK3R3,MAPK3,HDAC11,AKT3	5
Oncostatin M Signaling	1.68	0.176	-2.236	IL6ST,EPAS1,JAK1,MMP3,MAPK3,OSMR	4
Small Cell Lung Cancer Signaling	1.67	0.129	NaN	PIK3R3,CCNE2,PIK3C2A,FGFR1,CDK6,AKT3,PTGS2,CCND1,TRAF1,SKP2,PTEN	6
Regulation of the Epithelial-Mesenchymal Transition Pathway	1.67	0.106	NaN	ETS1,SMAD2,LOX,JAK1,WNT3,PIK3C2A,FGFR1,MET,PIK3R3,NOTCH2,MAPK3,ZEB2,APH1B,AKT3,GSK3B,JAG1,HMGA2,MAP2K5,EGFR,WNT5A	12
RAN Signaling	1.67	0.235	NaN	RCC1,RAN,KPNA1,IPO5	0
RAR Activation	1.65	0.105	NaN	PRKACB,SMAD2,MED1,PRKAR2A,SMAD6,SMARCE1,PDPK1,SMAD5,PTEN,PIK3R3,CSNK2A2,PRKAR2B,ALDH1A3,SMARCA2,GTF2H5,PRKCE,AKT3,SMARCC1,PHF10,GTF2H3	3
Sertoli Cell-Sertoli Cell Junction Signaling	1.65	0.107	NaN	PRKACB,CLDN11,EPN1,TJP2,NECTIN3,ITGA2,PRKAR2A,ITGA5,PTEN,TUBA1A,PRKAR2B,CLDN4,CDC42,CLDN1,MAPK3,MAP3K20,AKT3,GSK3B,VCL	5
14-3-3-mediated Signaling	1.64	0.115	-1.941	YWHAG,PIK3C2A,BAD,FGFR1,STRADA,YWHAZ,PIK3R3,SRPK2,TUBA1A,FOXO1,MAPK3,PRKCE,AKT3,GSK3B,RPS6KA1	4
FLT3 Signaling in Hematopoietic Progenitor Cells	1.64	0.128	-1.508	PIK3R3,MTOR,BAD,PIK3C2A,MAPK3,FGFR1,AKT3,PDPK1,RPS6KA1,CREB5,EIF4E	5
Glutathione Redox Reactions II	1.64	0.5	NaN	TXNDC12,GLRX	0
Melanoma Signaling	1.61	0.145	NaN	PIK3R3,BAD,PIK3C2A,MAPK3,FGFR1,AKT3,CCND1,PTEN	5
α-Adrenergic Signaling	1.61	0.126	-1.414	PRKACB,GNG4,GNAI3,GNB4,PRKAR2B,MAPK3,PRKAR2A,GNB5,PRKCE,PYGL,SLC8A1	1
PPARα/RXRα Activation	1.61	0.106	1	PRKACB,SMAD2,MED1,GNA11,PRKAR2A,ADIPOR1,ABCA1,NCOA3,CAND1,PRKAR2B,GHR,GPD2,MAPK3,CLOCK,PRKAA2,HSP90AA1,ADIPOR2,IL1RAP,ACVR2A	3
Role of NFAT in Cardiac Hypertrophy	1.59	0.104	NaN	GNG4,IL6ST,PRKACB,HDAC9,HDAC4,PIK3C2A,HDAC8,FGFR1,PRKAR2A,GNB5,PIK3R3,GNB4,GNAI3,PRKAR2B,MAPK3,HDAC11,PRKCE,AKT3,GSK3B,SLC8A1	4
Neurotrophin/TRK Signaling	1.57	0.13	-0.632	PIK3R3,PIK3C2A,CDC42,MAPK3,FGFR1,PDPK1,RPS6KA1,NGF,CREB5,MAP2K5	4
P2Y Purigenic Receptor Signaling Pathway	1.57	0.112	-1.155	PRKACB,GNG4,PIK3C2A,FGFR1,PRKAR2A,GNB5,CREB5,ITGB3,PIK3R3,GNB4,GNAI3,PRKAR2B,MAPK3,PRKCE,AKT3	2
Triacylglycerol Biosynthesis	1.56	0.152	NaN	GPAM,AGPAT5,ABHD5,LPCAT3,GPAT3,LPGAT1,ELOVL6	0
Role of Osteoblasts, Osteoclasts and Chondrocytes in Rheumatoid Arthritis	1.53	0.0987	NaN	MMP3,BAD,WNT3,PIK3C2A,NFATC3,MMP14,FGFR1,ITGA2,SMAD6,ITGA5,SMAD5,ITGB3,PIK3R3,TRADD,FOXO1,RUNX2,MAPK3,AKT3,NFATC2,GSK3B,CSF2,IL1RAP,WNT5A	7
Regulation of Cellular Mechanics by Calpain Protease	1.52	0.14	0	MAPK3,ITGA2,CDK6,ITGA5,CAST,VCL,CCND1,EGFR	4
EGF Signaling	1.51	0.132	-1	PIK3R3,CSNK2A2,MTOR,JAK1,PIK3C2A,MAPK3,FGFR1,AKT3,EGFR	5
GADD45 Signaling	1.51	0.211	NaN	CCNE2,CCND2,BRCA1,CCND1	2
DNA damage-induced 14-3-3σ Signaling	1.51	0.211	NaN	CCNE2,AKT3,BRCA1,RAD1	0
ILK Signaling	1.5	0.102	-0.471	PIK3C2A,FGFR1,VEGFC,PDPK1,CREB5,CCND1,PPP2R5A,ITGB3,PTEN,PIK3R3,MTOR,CFL2,CDC42,MAPK3,AKT3,PTGS2,GSK3B,VCL,PPP2R1B,FNBP1	9
Superpathway of Cholesterol Biosynthesis	1.49	0.179	NaN	SQLE,PMVK,LSS,SC5D,LBR	0
Superpathway of Inositol Phosphate Compounds	1.49	0.0979	NaN	CDC25C,PIK3C2A,MTMR9,PTPN2,FGFR1,PIP4K2B,ERBB3,PXYLP1,PTPRF,PPP2R5A,PTEN,MET,PIK3R3,DUSP5,PTPRJ,PPP1R7,PPM1H,PRUNE1,DUSP12,PPIP5K2,PIP4K2C,EGFR,CDC25A	6
Virus Entry via Endocytic Pathways	1.49	0.118	NaN	DNM1,PIK3R3,PIK3C2A,CDC42,FGFR1,ITGA2,ITGA6,ITGA5,TFRC,PRKCE,CXADR,ITGB3	3
Leukocyte Extravasation Signaling	1.47	0.0995	-1.213	CLDN11,MMP3,PIK3C2A,MMP14,FGFR1,ITGA2,WASL,ITGA6,ITGA5,CRK,RAP1A,ITGB3,PIK3R3,ARHGAP5,GNAI3,CLDN4,CDC42,CLDN1,PRKCE,VCL,TIMP2	5
Role of BRCA1 in DNA Damage Response	1.47	0.125	NaN	SMARCA2,MRE11,BARD1,SMARCE1,SMARCC1,RFC5,BRCA1,FANCA,PHF10,RFC3	0
Glioblastoma Multiforme Signaling	1.47	0.105	-1.291	WNT3,PIK3C2A,FGFR1,CDK6,CCND1,PDGFB,PTEN,PIK3R3,MTOR,FOXO1,CDC42,MAPK3,AKT3,GSK3B,FNBP1,EGFR,WNT5A	10
Serine Biosynthesis	1.43	0.4	NaN	PSAT1,PHGDH	0
2-oxobutanoate Degradation I	1.43	0.4	NaN	PCCA,DLD	0
dTMP De Novo Biosynthesis	1.43	0.4	NaN	SHMT1,DHFR2	0
Cancer Drug Resistance By Drug Efflux	1.43	0.143	NaN	PIK3R3,FOXO1,MAPK3,FOXO3,AKT3,PTGS2,PTEN	4
Type II Diabetes Mellitus Signaling	1.42	0.109	-0.577	PIK3C2A,SLC27A2,FGFR1,PDPK1,ADIPOR1,PIK3R3,TRADD,MTOR,MAPK3,PRKAA2,PRKCE,AKT3,ACSL4,ADIPOR2	3
Acute Myeloid Leukemia Signaling	1.42	0.118	-1	PIK3R3,MTOR,BAD,PIK3C2A,PIM1,MAPK3,FGFR1,AKT3,CCND1,MAP2K5,IDH1	7
Netrin Signaling	1.42	0.154	NaN	PRKACB,PRKAR2B,NFATC3,PRKAR2A,NFATC2,ENAH	1
Signaling by Rho Family GTPases	1.42	0.0952	-0.243	GNG4,ACTR2,NEDD4,PIK3C2A,FGFR1,GNA11,ITGA2,WASL,GNB5,ITGA5,PIP4K2B,CLIP1,PIK3R3,GNAI3,GNB4,CFL2,CYFIP1,CDC42,MAPK3,MAP3K20,ARHGEF18,FNBP1,PIP4K2C,SEPT2	3
Phospholipase C Signaling	1.39	0.0954	-0.943	GNG4,HDAC9,NAPEPLD,HDAC4,HDAC8,NFATC3,ITGA2,RALB,GNB5,ITGA5,CREB5,RAP1A,TGM2,PLA2G4A,GNB4,AHNAK,MAPK3,HDAC11,PRKCE,NFATC2,ARHGEF18,FNBP1,PLA2G12A	4
B Cell Receptor Signaling	1.38	0.0995	-1.147	ETS1,PIK3C2A,BAD,NFATC3,FGFR1,PDPK1,CREB5,RAP1A,PTEN,PIK3R3,MTOR,FOXO1,CFL2,CDC42,MAPK3,PAG1,AKT3,NFATC2,GSK3B	10
Sonic Hedgehog Signaling	1.38	0.167	-1.342	PRKACB,GLI2,PRKAR2B,PRKAR2A,GSK3B	1
HIF1α Signaling	1.37	0.11	NaN	PIK3C2A,MMP3,MMP14,FGFR1,MAPK6,VEGFC,PIK3R3,EDN1,SLC2A14,MAPK3,AKT3,HSP90AA1,VHL	5
Salvage Pathways of Pyrimidine Ribonucleotides	1.36	0.116	NaN	PIM1,MAPK3,UPP1,NME2,MAPK6,CDK6,PRKAA2,AK4,PRKCE,ACVR2A,IRAK1	4
Breast Cancer Regulation by Stathmin1	1.35	0.0976	NaN	GNG4,PRKACB,CCNE2,PIK3C2A,FGFR1,PRKAR2A,GNB5,TSG101,PPP2R5A,PIK3R3,GNB4,GNAI3,TUBA1A,PRKAR2B,CDC42,PPP1R7,MAPK3,PRKCE,ARHGEF18,PPP2R1B	4
Human Embryonic Stem Cell Pluripotency	1.35	0.105	NaN	SMAD2,WNT3,PIK3C2A,FGFR1,SMAD6,PDPK1,SMAD5,NGF,PDGFB,INHBA,PIK3R3,FOXO1,AKT3,GSK3B,WNT5A	4
Calcium Signaling	1.35	0.1	-1.667	PRKACB,HDAC9,HDAC4,HDAC8,ATP2B1,NFATC3,PRKAR2A,TPM3,TPM1,CREB5,RAP1A,PRKAR2B,MAPK3,HDAC11,NFATC2,ASPH,TPM4,SLC8A1	3
Aldosterone Signaling in Epithelial Cells	1.34	0.101	-1.265	NEDD4,PIK3C2A,FGFR1,DNAJC27,DNAJC19,PIP4K2B,PDPK1,DNAJC15,DNAJB9,PIK3R3,HSPA4,MAPK3,ASIC1,HSPA13,HSP90AA1,PRKCE,PIP4K2C	3
Ephrin B Signaling	1.34	0.123	0	GNG4,GNAI3,GNB4,CFL2,CDC42,MAPK3,GNA11,GNB5,ITSN2	2
GM-CSF Signaling	1.34	0.123	-1.667	ETS1,PIK3R3,PIK3C2A,PIM1,MAPK3,FGFR1,AKT3,CSF2,CCND1	5
Glycogen Degradation II	1.32	0.231	NaN	PGM2L1,PYGL,MTAP	0
Relaxin Signaling	1.31	0.102	-0.632	GNG4,PRKACB,NAPEPLD,PIK3C2A,FGFR1,GNA11,PRKAR2A,GNB5,RAP1A,PIK3R3,GNB4,GNAI3,PRKAR2B,NPR3,MAPK3,AKT3	3
STAT3 Pathway	1.31	0.122	-1.667	GHR,PTPN2,PIM1,MAPK3,FGFR1,MAP3K20,IGF2R,CDC25A,EGFR	3
CNTF Signaling	1.3	0.127	-1.414	IL6ST,PIK3R3,MTOR,JAK1,PIK3C2A,MAPK3,FGFR1,RPS6KA1	5
Leptin Signaling in Obesity	1.29	0.116	-0.378	PRKACB,PIK3R3,PRKAR2B,FOXO1,PIK3C2A,LEPR,MAPK3,FGFR1,PRKAR2A,AKT3	2
NF-κB Activation by Viruses	1.26	0.115	-1.897	PIK3R3,PIK3C2A,MAPK3,FGFR1,ITGA2,ITGA6,ITGA5,AKT3,PRKCE,ITGB3	2
HIPPO signaling	1.26	0.115	1.633	SMAD2,TJP2,YWHAG,PPP1R7,YWHAZ,SCRIB,SMAD5,PPP2R1B,PPP2R5A,SKP2	2
TGF-β Signaling	1.26	0.115	-0.632	SMAD2,RUNX2,CDC42,MAPK3,SMAD6,SMURF2,SMAD5,INHBB,ACVR2A,INHBA	3
CDK5 Signaling	1.25	0.111	0.333	PRKACB,PRKAR2B,PPP1R7,MAPK3,ITGA2,PRKAR2A,MAPK6,ITGA6,NGF,PPP2R1B,PPP2R5A	1
fMLP Signaling in Neutrophils	1.25	0.106	-1.897	GNG4,ACTR2,PIK3C2A,NFATC3,FGFR1,GNB5,PIK3R3,GNB4,GNAI3,CDC42,MAPK3,PRKCE,NFATC2	4
DNA Double-Strand Break Repair by Homologous Recombination	1.24	0.214	NaN	GEN1,MRE11,BRCA1	0
DNA Double-Strand Break Repair by Non-Homologous End Joining	1.24	0.214	NaN	WRN,MRE11,XRCC4	0
Isoleucine Degradation I	1.24	0.214	NaN	BCAT1,AUH,DLD	0
CREB Signaling in Neurons	1.24	0.0968	-1.732	POLR2I,GNG4,PRKACB,PIK3C2A,FGFR1,GNA11,PRKAR2A,GNB5,CREB5,PIK3R3,GNB4,GNAI3,PRKAR2B,MAPK3,PRKCE,AKT3,RPS6KA1,POLR2L	2
Pyridoxal 5'-phosphate Salvage Pathway	1.23	0.123	NaN	PIM1,MAPK3,MAPK6,CDK6,PRKAA2,PRKCE,ACVR2A,IRAK1	4
VEGF Family Ligand-Receptor Interactions	1.23	0.114	-1	PIK3R3,PLA2G4A,PIK3C2A,MAPK3,FGFR1,VEGFC,AKT3,PRKCE,PLA2G12A,NRP1	4
Gαq Signaling	1.23	0.0994	-1.387	GNG4,RGS2,NAPEPLD,PIK3C2A,NFATC3,FGFR1,GNA11,GNB5,PIK3R3,GNB4,MAPK3,PRKCE,AKT3,NFATC2,GSK3B,FNBP1	4
D-myo-inositol-5-phosphate Metabolism	1.21	0.0988	NaN	CDC25C,MTMR9,PTPN2,PIP4K2B,PXYLP1,PTPRF,PPP2R5A,PTEN,DUSP5,PTPRJ,PPP1R7,PPM1H,PRUNE1,DUSP12,PIP4K2C,CDC25A	3
Nitric Oxide Signaling in the Cardiovascular System	1.2	0.106	-0.905	PRKACB,PIK3R3,PRKAR2B,PIK3C2A,MAPK3,FGFR1,PRKAR2A,VEGFC,HSP90AA1,SLC7A1,AKT3,PRKCE	4
PAK Signaling	1.2	0.109	0	PIK3R3,CFL2,PIK3C2A,CDC42,MAPK3,PAK1IP1,FGFR1,WASL,ITGA2,ITGA5,PDGFB	3
Unfolded protein response	1.2	0.127	NaN	HSPA4,INSIG1,DNAJA2,DNAJB9,NFE2L2,CEBPG,EIF2A	1
Thiamin Salvage III	1.19	1	NaN	TPK1	0
Sorbitol Degradation I	1.19	1	NaN	SORD	0
L-cysteine Degradation II	1.19	1	NaN	CTH	0
Asparagine Biosynthesis I	1.19	1	NaN	ASNS	0
Lanosterol Biosynthesis	1.19	1	NaN	LSS	0
Estrogen-Dependent Breast Cancer Signaling	1.19	0.115	-2.121	PIK3R3,PIK3C2A,MAPK3,FGFR1,HSD17B12,AKT3,CREB5,CCND1,EGFR	4
IL-17A Signaling in Airway Cells	1.19	0.115	-1.414	PIK3R3,CXCL3,JAK1,PIK3C2A,MAPK3,FGFR1,AKT3,GSK3B,PTEN	5
RhoGDI Signaling	1.17	0.096	0	GNG4,ACTR2,GNA11,ITGA2,WASL,GNB5,ITGA5,PIP4K2B,ARHGDIB,ARHGAP5,GNB4,GNAI3,CFL2,CDC42,ARHGEF18,FNBP1,PIP4K2C	1
Cell Cycle Control of Chromosomal Replication	1.16	0.125	NaN	CDC45,MCM2,CDK16,CDK6,CDC7,CDK19,MCM9	2
nNOS Signaling in Skeletal Muscle Cells	1.16	0.2	NaN	SNTB2,DMD,DAG1	0
Glycogen Degradation III	1.16	0.2	NaN	PGM2L1,PYGL,MTAP	0
CD40 Signaling	1.16	0.114	-0.707	PIK3R3,TANK,PIK3C2A,MAPK3,FGFR1,TNFAIP3,PTGS2,MAP2K5,TRAF1	5
Role of PI3K/AKT Signaling in the Pathogenesis of Influenza	1.16	0.114	-2.121	PIK3R3,GNAI3,PIK3C2A,MAPK3,FGFR1,AKT3,CRK,CCL5,GSK3B	3
Cardiac β-adrenergic Signaling	1.15	0.1	-0.378	PRKACB,GNG4,NAPEPLD,GRK3,PRKAR2A,GNB5,PPP2R5A,GNB4,PRKAR2B,PPP1R7,AKAP10,SLC8A1,PPP2R1B,AKAP1	0
Ceramide Degradation	1.15	0.286	NaN	NAAA,ASAH1	0
MIF-mediated Glucocorticoid Regulation	1.13	0.143	1	PLA2G4A,MAPK3,PTGS2,NR3C1,PLA2G12A	3
Nucleotide Excision Repair Pathway	1.13	0.143	NaN	POLR2I,GTF2H5,ERCC5,POLR2L,GTF2H3	0
IL-1 Signaling	1.13	0.109	0.378	PRKACB,GNG4,GNAI3,GNB4,PRKAR2B,GNA11,PRKAR2A,GNB5,IL1RAP,IRAK1	1
Role of JAK family kinases in IL-6-type Cytokine Signaling	1.12	0.16	NaN	IL6ST,JAK1,MAPK3,OSMR	3
Rac Signaling	1.11	0.103	-1.732	PIK3R3,ACTR2,CFL2,PIK3C2A,CYFIP1,CDC42,MAPK3,FGFR1,ITGA2,ITGA5,PIP4K2B,PIP4K2C	3
Role of IL-17A in Arthritis	1.11	0.116	NaN	PIK3R3,CXCL3,PIK3C2A,MAPK3,FGFR1,RPS6KA1,PTGS2,CCL5	3
Fcγ Receptor-mediated Phagocytosis in Macrophages and Monocytes	1.1	0.108	-2.53	PIK3R3,ACTR2,NAPEPLD,CDC42,MAPK3,AKT3,PRKCE,CRK,CSF2,PTEN	4
NF-κB Signaling	1.1	0.0939	-0.5	PRKACB,PIK3C2A,FGFR1,TNFAIP3,NGF,IGF2R,IRAK1,TLR2,TANK,PIK3R3,CSNK2A2,TRADD,GHR,TGFA,AKT3,GSK3B,EGFR	6
Mismatch Repair in Eukaryotes	1.09	0.188	NaN	RFC5,EXO1,RFC3	0
Glioma Invasiveness Signaling	1.08	0.114	-0.707	PIK3R3,PIK3C2A,MAPK3,HMMR,FGFR1,FNBP1,TIMP2,ITGB3	2
Antiproliferative Role of TOB in T Cell Signaling	1.07	0.154	NaN	SMAD2,CCNE2,RPS6KA1,SKP2	2
Estrogen-mediated S-phase Entry	1.07	0.154	-2	CCNE2,CCND1,CDC25A,SKP2	2
D-myo-inositol (1,4,5,6)-Tetrakisphosphate Biosynthesis	1.07	0.0972	NaN	CDC25C,MTMR9,PTPN2,PXYLP1,PTPRF,PPP2R5A,PTEN,DUSP5,PTPRJ,PPP1R7,PPM1H,PRUNE1,DUSP12,CDC25A	3
D-myo-inositol (3,4,5,6)-tetrakisphosphate Biosynthesis	1.07	0.0972	NaN	CDC25C,MTMR9,PTPN2,PXYLP1,PTPRF,PPP2R5A,PTEN,DUSP5,PTPRJ,PPP1R7,PPM1H,PRUNE1,DUSP12,CDC25A	3
IL-3 Signaling	1.05	0.108	-1.667	PIK3R3,JAK1,BAD,FOXO1,PIK3C2A,MAPK3,FGFR1,AKT3,PRKCE	4
Cell Cycle Regulation by BTG Family Proteins	1.05	0.135	NaN	CCNE2,BTG2,PPP2R1B,CCND1,PPP2R5A	1
Superpathway of Methionine Degradation	1.05	0.135	NaN	EEF1AKMT3,PCCA,SUV39H2,DLD,CTH	0
Superoxide Radicals Degradation	1.04	0.25	NaN	NQO1,CAT	0
NGF Signaling	1.03	0.0992	-1.732	PIK3R3,PIK3C2A,CDC42,MAPK3,FGFR1,AKT3,PDPK1,CRK,RPS6KA1,NGF,CREB5,RAP1A	4
ErbB4 Signaling	1.03	0.111	-1.134	NRG1,PIK3R3,PIK3C2A,MAPK3,FGFR1,PDPK1,APH1B,PRKCE	2
Adipogenesis pathway	1.02	0.097	NaN	ATG5,HDAC9,HDAC4,HDAC8,FGFR1,SMAD5,FOXO1,HDAC11,CLOCK,GTF2H5,RPS6KA1,GTF2H3,WNT5A	1
Notch Signaling	1.01	0.132	-2.236	NOTCH2,APH1B,JAG1,NUMBL,RFNG	2
IL-17 Signaling	1	0.106	NaN	PIK3R3,JAK1,PIK3C2A,MMP3,MAPK3,FGFR1,AKT3,PTGS2,GSK3B	6
Hepatic Fibrosis / Hepatic Stellate Cell Activation	1	0.0909	NaN	IGFBP4,SMAD2,LEPR,FGFR1,COL12A1,KLF6,VEGFC,CCL5,IFNAR2,PDGFB,MET,CXCL3,EDN1,TGFA,IL1RAP,EGFR,TIMP2	5
Melanocyte Development and Pigmentation Signaling	0.988	0.102	-1.265	PRKACB,PIK3R3,PRKAR2B,PIK3C2A,MAPK3,FGFR1,PRKAR2A,CRK,RPS6KA1,CREB5	2
mTOR Signaling	0.987	0.0896	-1.5	NAPEPLD,PIK3C2A,DDIT4,FGFR1,VEGFC,PDPK1,EIF4E,PPP2R5A,PIK3R3,MTOR,MAPK3,PRKAA2,PRKCE,AKT3,RPS6KA1,RPS2,PPP2R1B,FNBP1	5
Assembly of RNA Polymerase II Complex	0.987	0.12	NaN	POLR2I,TAF5,GTF2H5,TAF13,POLR2L,GTF2H3	0
Inhibition of Matrix Metalloproteases	0.976	0.128	NaN	SDC1,MMP3,SDC2,MMP14,TIMP2	2
Valine Degradation I	0.969	0.167	NaN	BCAT1,AUH,DLD	0
Neuroinflammation Signaling Pathway	0.956	0.0836	-1.961	JAK1,MMP3,NFATC3,TICAM2,CCL5,NGF,IRAK1,HMGB1,MAPK3,AKT3,GSK3B,NFE2L2,PLA2G12A,PIK3C2A,GLS,FGFR1,MAPK6,CREB5,BIRC5,TLR2,PIK3R3,PLA2G4A,NFATC2,APH1B,PTGS2,ACVR2A	10
Sphingosine and Sphingosine-1-phosphate Metabolism	0.952	0.222	NaN	NAAA,ASAH1	0
Phosphatidylethanolamine Biosynthesis II	0.952	0.222	NaN	SELENOI,ETNK1	0
Corticotropin Releasing Hormone Signaling	0.937	0.0973	-1.265	PRKACB,GNAI3,GLI2,PRKAR2B,NPR3,MAPK3,PRKAR2A,PRKCE,PTGS2,CREB5,RAP1A	3
Antiproliferative Role of Somatostatin Receptor 2	0.926	0.105	-1	GNG4,PIK3R3,GNB4,NPR3,PIK3C2A,MAPK3,FGFR1,GNB5	2
IL-2 Signaling	0.922	0.109	-1.633	PIK3R3,CSNK2A2,JAK1,PIK3C2A,MAPK3,FGFR1,AKT3	3
Granulocyte Adhesion and Diapedesis	0.92	0.0894	NaN	CLDN11,SDC1,MMP3,MMP14,ITGA2,ITGA6,ITGA5,SDC4,CCL5,ITGB3,CXCL3,GNAI3,CLDN4,SDC2,CLDN1,IL1RAP	3
IL-4 Signaling	0.912	0.101	NaN	PIK3R3,MTOR,JAK1,PIK3C2A,NFATC3,FGFR1,NFATC2,AKT3,NR3C1	5
Mechanisms of Viral Exit from Host Cells	0.906	0.122	NaN	NEDD4,CHMP2B,VPS36,PRKCE,TSG101	1
Epoxysqualene Biosynthesis	0.901	0.5	NaN	SQLE	0
All-trans-decaprenyl Diphosphate Biosynthesis	0.901	0.5	NaN	PDSS1	0
S-methyl-5'-thioadenosine Degradation II	0.901	0.5	NaN	MTAP	0
Sulfate Activation for Sulfonation	0.901	0.5	NaN	PAPSS2	0
Cysteine Biosynthesis/Homocysteine Degradation	0.901	0.5	NaN	CTH	0
Adenine and Adenosine Salvage I	0.901	0.5	NaN	APRT	0
Formaldehyde Oxidation II (Glutathione-dependent)	0.901	0.5	NaN	ADH5	0
Glycine Biosynthesis I	0.901	0.5	NaN	SHMT1	0
Glutamine Degradation I	0.901	0.5	NaN	GLS	0
Aryl Hydrocarbon Receptor Signaling	0.897	0.0922	-2.53	CCNE2,MED1,NQO1,CDK6,CCND1,NCOA3,TGM2,CCND2,ALDH1A3,MAPK3,HSP90AA1,NFE2L2,MGST3	6
Triacylglycerol Degradation	0.896	0.113	NaN	LIPC,PPME1,CES2,AARS,NDST1,ABHD16A	0
Production of Nitric Oxide and Reactive Oxygen Species in Macrophages	0.895	0.0876	-2	JAK1,PIK3C2A,FGFR1,PCYOX1,RAP1A,PPP2R5A,TLR2,PIK3R3,PPP1R7,MAPK3,CAT,PRKCE,AKT3,SERPINA1,PPP2R1B,FNBP1,CLU	4
PDGF Signaling	0.89	0.1	-1	PIK3R3,CSNK2A2,JAK1,ABL2,PIK3C2A,MAPK3,FGFR1,CRK,PDGFB	3
Xenobiotic Metabolism Signaling	0.882	0.0828	NaN	HDAC4,PIK3C2A,UGT2B7,MED1,FGFR1,HS2ST1,NQO1,UGT8,CES2,PPP2R5A,CUL3,PIK3R3,ANKRA2,ALDH1A3,MAPK3,CAT,HSP90AA1,PRKCE,ABCC3,NFE2L2,PPP2R1B,NDST1,MGST3,MAP2K5	5
VDR/RXR Activation	0.879	0.103	NaN	IGFBP6,FOXO1,RUNX2,MED1,PRKCE,CCL5,CSF2,NCOA3	0
Angiopoietin Signaling	0.879	0.103	-1.342	PIK3R3,BAD,FOXO1,PIK3C2A,FGFR1,AKT3,CRK,BIRC5	3
CCR3 Signaling in Eosinophils	0.862	0.0923	NaN	GNG4,PIK3R3,GNAI3,PLA2G4A,GNB4,CFL2,PIK3C2A,MAPK3,FGFR1,GNB5,PRKCE,PLA2G12A	2
Reelin Signaling in Neurons	0.848	0.0978	NaN	PIK3R3,PAFAH1B2,PIK3C2A,FGFR1,ITGA2,ITGA6,ITGA5,GSK3B,ITGB3	2
Lymphotoxin β Receptor Signaling	0.846	0.104	-1.134	PIK3R3,PIK3C2A,MAPK3,FGFR1,AKT3,PDPK1,TRAF1	2
Stearate Biosynthesis I (Animals)	0.842	0.116	NaN	SLC27A2,ZADH2,ACSL4,ACOT4,ELOVL6	0
3-phosphoinositide Degradation	0.835	0.0886	NaN	CDC25C,MTMR9,PTPN2,PXYLP1,PTPRF,PPP2R5A,PTEN,DUSP5,PTPRJ,PPP1R7,PPM1H,PRUNE1,DUSP12,CDC25A	3
4-1BB Signaling in T Lymphocytes	0.822	0.125	-2	TNFRSF9,MAPK3,TNFSF9,TRAF1	2
Fatty Acid β-oxidation I	0.822	0.125	NaN	SLC27A2,AUH,ACSL4,ACADM	0
Actin Nucleation by ARP-WASP Complex	0.814	0.107	0.816	ACTR2,CDC42,WASL,ITGA2,ITGA5,FNBP1	1
Germ Cell-Sertoli Cell Junction Signaling	0.812	0.0867	NaN	EPN1,PIK3C2A,FGFR1,ITGA2,WASL,NECTIN3,ITGA6,PDPK1,PIK3R3,TUBA1A,CFL2,CDC42,MAPK3,VCL,FNBP1	3
Gαi Signaling	0.808	0.0917	0	PRKACB,GNG4,GNAI3,GNB4,PRKAR2B,NPR3,MAPK3,RALB,PRKAR2A,GNB5,RAP1A	3
Remodeling of Epithelial Adherens Junctions	0.799	0.101	NaN	DNM1,MET,ACTR2,RAB5A,TUBA1A,VCL,CLIP1	1
Role of Macrophages, Fibroblasts and Endothelial Cells in Rheumatoid Arthritis	0.793	0.0801	NaN	IL6ST,WNT3,MMP3,NFATC3,CCL5,CCND1,CEBPG,IRAK1,TRADD,MAPK3,AKT3,PRKCE,GSK3B,IL1RAP,TRAF1,PIK3C2A,FGFR1,VEGFC,CREB5,PDGFB,TLR2,PIK3R3,NFATC2,CSF2,WNT5A	10
Myc Mediated Apoptosis Signaling	0.777	0.1	NaN	PIK3R3,YWHAG,BAD,PIK3C2A,FGFR1,YWHAZ,AKT3	2
Role of NANOG in Mammalian Embryonic Stem Cell Pluripotency	0.775	0.0902	-2.121	IL6ST,PIK3R3,JAK1,PIK3C2A,WNT3,MAPK3,FGFR1,AKT3,SMAD5,GSK3B,WNT5A	6
Caveolar-mediated Endocytosis Signaling	0.755	0.0986	NaN	RAB5A,ITGA2,ITGA6,COPE,ITGA5,ITGB3,EGFR	1
Circadian Rhythm Signaling	0.754	0.118	NaN	PER3,BHLHE41,CLOCK,CREB5	0
DNA Methylation and Transcriptional Repression Signaling	0.754	0.118	NaN	H3F3A/H3F3B,HIST2H4B,ARID4B,SUDS3	0
Inhibition of Angiogenesis by TSP1	0.754	0.118	NaN	SDC1,THBS1,SDC2,AKT3	1
Gαs Signaling	0.754	0.0909	-1.134	PRKACB,GNG4,GNB4,RGS2,PRKAR2B,MAPK3,PRKAR2A,GNB5,CREB5,RAP1A	2
Cleavage and Polyadenylation of Pre-mRNA	0.744	0.167	NaN	PAPOLA,CPSF6	0
Diphthamide Biosynthesis	0.739	0.333	NaN	DPH6	0
N-acetylglucosamine Degradation I	0.739	0.333	NaN	GNPDA2	0
TCA Cycle II (Eukaryotic)	0.734	0.13	NaN	DLD,IDH3A,ACO1	0
TR/RXR Activation	0.734	0.0918	NaN	PIK3R3,RAB3B,MTOR,PIK3C2A,MED1,FGFR1,AKT3,THRA,NCOA3	2
ATM Signaling	0.734	0.0918	0	CDC25C,H2AFX,MRE11,CREB5,BRCA1,PPP2R1B,PPP2R5A,CDC25A,SMC1A	2
Melatonin Signaling	0.733	0.0972	-0.378	PRKACB,GNAI3,PRKAR2B,MAPK3,PRKAR2A,PRKCE,MAP2K5	2
Role of MAPK Signaling in the Pathogenesis of Influenza	0.733	0.0972	NaN	PAFAH1B2,PLA2G4A,MAPK3,AKT3,PTGS2,CCL5,PLA2G12A	2
Growth Hormone Signaling	0.732	0.0941	-1.414	PIK3R3,GHR,PIK3C2A,MAPK3,FGFR1,PDPK1,PRKCE,RPS6KA1	2
Ephrin A Signaling	0.717	0.1	NaN	PIK3R3,CFL2,PIK3C2A,CDC42,FGFR1,EPHA2	2
CTLA4 Signaling in Cytotoxic T Lymphocytes	0.716	0.0909	NaN	PIK3R3,AP1M2,PIK3C2A,AP1S2,FGFR1,AP1S3,AKT3,PPP2R1B,PPP2R5A	1
Cardiac Hypertrophy Signaling	0.711	0.0805	-0.5	GNG4,PRKACB,PIK3C2A,FGFR1,GNA11,PRKAR2A,GNB5,EIF4E,PIK3R3,ADSS,GNB4,GNAI3,MTOR,PRKAR2B,MAPK3,EIF2B1,RPS6KA1,GSK3B,FNBP1	5
Paxillin Signaling	0.704	0.0885	-0.707	PIK3R3,PIK3C2A,CDC42,FGFR1,ITGA2,ITGA6,ITGA5,CRK,VCL,ITGB3	2
Gap Junction Signaling	0.703	0.0821	NaN	PRKACB,TJP2,PIK3C2A,FGFR1,PRKAR2A,GJC1,PIK3R3,GNAI3,TUBA1A,PRKAR2B,NPR3,MAPK3,PRKCE,AKT3,MAP2K5,EGFR	4
IL-22 Signaling	0.696	0.125	NaN	JAK1,MAPK3,AKT3	2
Role of JAK1, JAK2 and TYK2 in Interferon Signaling	0.696	0.125	NaN	JAK1,PTPN2,IFNAR2	1
Cysteine Biosynthesis III (mammalia)	0.696	0.125	NaN	EEF1AKMT3,SUV39H2,CTH	0
Interferon Signaling	0.693	0.111	NaN	JAK1,PTPN2,IRF9,IFNAR2	1
Fatty Acid Activation	0.689	0.154	NaN	SLC27A2,ACSL4	0
Choline Biosynthesis III	0.689	0.154	NaN	NAPEPLD,PHKA1	0
NAD Phosphorylation and Dephosphorylation	0.689	0.154	NaN	NADK2,PXYLP1	0
Neuropathic Pain Signaling In Dorsal Horn Neurons	0.673	0.087	-1.265	PRKACB,PIK3R3,KCNN4,PRKAR2B,GPR37,PIK3C2A,MAPK3,FGFR1,PRKAR2A,PRKCE	2
TREM1 Signaling	0.673	0.0933	-1.89	TLR2,CXCL3,MAPK3,ITGA5,AKT3,CSF2,IRAK1	2
Acute Phase Response Signaling	0.67	0.0824	-0.577	IL6ST,PDPK1,SERPINA3,NR3C1,IRAK1,PIK3R3,TRADD,MTOR,MAPK3,SAA1,AKT3,SERPINA1,OSMR,IL1RAP	6
Ethanol Degradation II	0.664	0.108	NaN	ADH5,DHRS2,ALDH1A3,PECR	0
IL-17A Signaling in Gastric Cells	0.66	0.12	NaN	MAPK3,CCL5,EGFR	2
IL-15 Signaling	0.654	0.0921	NaN	PIK3R3,JAK1,PIK3C2A,MAPK3,FGFR1,AKT3,CSF2	3
BMP signaling pathway	0.654	0.0921	-0.378	PRKACB,PRKAR2B,RUNX2,MAPK3,PRKAR2A,SMAD6,SMAD5	1
Wnt/Ca+ pathway	0.651	0.0952	-2	NFATC3,NFATC2,GSK3B,ROR1,CREB5,WNT5A	3
eNOS Signaling	0.645	0.0814	-0.302	PRKACB,PIK3C2A,FGFR1,PRKAR2A,VEGFC,SLC7A1,PDPK1,PIK3R3,HSPA4,PRKAR2B,PRKAA2,PRKCE,AKT3,HSP90AA1	3
Regulation of Actin-based Motility by Rho	0.642	0.0889	0	ACTR2,CDC42,WASL,ITGA2,ITGA5,PIP4K2B,FNBP1,PIP4K2C	1
Uracil Degradation II (Reductive)	0.628	0.25	NaN	DPYD	0
Branched-chain α-keto acid Dehydrogenase Complex	0.628	0.25	NaN	DLD	0
Phenylethylamine Degradation I	0.628	0.25	NaN	AOC2	0
Methylmalonyl Pathway	0.628	0.25	NaN	PCCA	0
Ascorbate Recycling (Cytosolic)	0.628	0.25	NaN	GLRX	0
Thymine Degradation	0.628	0.25	NaN	DPYD	0
Glycerol-3-phosphate Shuttle	0.628	0.25	NaN	GPD2	0
N-acetylglucosamine Degradation II	0.628	0.25	NaN	GNPDA2	0
FGF Signaling	0.625	0.0879	-2.121	MET,PIK3R3,PIK3C2A,MAPK3,FGFR1,AKT3,CRK,CREB5	3
Fc Epsilon RI Signaling	0.614	0.084	NaN	PIK3R3,PLA2G4A,PIK3C2A,MAPK3,FGFR1,AKT3,PDPK1,PRKCE,CSF2,PLA2G12A	2
tRNA Charging	0.611	0.103	NaN	NARS,TARSL2,HARS,AARS	0
Mouse Embryonic Stem Cell Pluripotency	0.603	0.0849	-2.333	IL6ST,PIK3R3,JAK1,PIK3C2A,MAPK3,FGFR1,AKT3,SMAD5,GSK3B	5
UVA-Induced MAPK Signaling	0.603	0.0849	-1.414	PIK3R3,TNKS,MTOR,PIK3C2A,MAPK3,FGFR1,RPS6KA1,PARP14,EGFR	4
Telomere Extension by Telomerase	0.596	0.133	NaN	TNKS,MRE11	0
Superpathway of Citrulline Metabolism	0.596	0.133	NaN	GLS,CPS1	0
Ceramide Signaling	0.593	0.086	0.707	PIK3R3,BAD,PIK3C2A,MAPK3,FGFR1,AKT3,PPP2R1B,PPP2R5A	3
Semaphorin Signaling in Neurons	0.587	0.0943	NaN	MET,CFL2,MAPK3,FNBP1,NRP1	3
Noradrenaline and Adrenaline Degradation	0.586	0.1	NaN	ADH5,DHRS2,ALDH1A3,PECR	0
Antioxidant Action of Vitamin C	0.574	0.0833	0.816	PAFAH1B2,PLA2G4A,NAPEPLD,MAPK3,SLC2A14,NXN,CSF2,GLRX,PLA2G12A	1
Synaptic Long Term Potentiation	0.573	0.082	-1.265	PRKACB,PRKAR2B,PPP1R7,MAPK3,GNA11,PRKAR2A,PRKCE,RPS6KA1,CREB5,RAP1A	2
Erythropoietin Signaling	0.566	0.0864	NaN	PIK3R3,PIK3C2A,MAPK3,FGFR1,AKT3,PDPK1,PRKCE	2
CXCR4 Signaling	0.563	0.0788	-1.667	GNG4,PIK3C2A,FGFR1,GNA11,GNB5,CRK,PIK3R3,GNB4,GNAI3,MAPK3,PRKCE,AKT3,FNBP1	2
iCOS-iCOSL Signaling in T Helper Cells	0.559	0.0813	-0.333	PIK3R3,BAD,PIK3C2A,NFATC3,FGFR1,NFATC2,AKT3,PDPK1,PLEKHA1,PTEN	4
Chondroitin Sulfate Degradation (Metazoa)	0.555	0.125	NaN	TMEM2,GM2A	0
Vitamin-C Transport	0.555	0.125	NaN	NXN,GLRX	0
Protein Citrullination	0.545	0.2	NaN	PADI2	0
2-ketoglutarate Dehydrogenase Complex	0.545	0.2	NaN	DLD	0
Tetrahydrofolate Salvage from 5,10-methenyltetrahydrofolate	0.545	0.2	NaN	MTHFD2	0
Tetrapyrrole Biosynthesis II	0.545	0.2	NaN	ALAD	0
Eumelanin Biosynthesis	0.545	0.2	NaN	DDT	0
Folate Polyglutamylation	0.545	0.2	NaN	SHMT1	0
CCR5 Signaling in Macrophages	0.538	0.087	NaN	GNG4,GNAI3,GNB4,GNB5,PRKCE,CCL5	0
Prolactin Signaling	0.534	0.0843	-0.816	PIK3R3,PIK3C2A,MAPK3,FGFR1,PDPK1,PRKCE,NR3C1	3
JAK/Stat Signaling	0.534	0.0843	-1.134	PIK3R3,MTOR,JAK1,PIK3C2A,MAPK3,FGFR1,AKT3	4
Sphingosine-1-phosphate Signaling	0.534	0.08	-1.414	PIK3R3,GNAI3,NAAA,PIK3C2A,MAPK3,FGFR1,AKT3,FNBP1,PDGFB,ASAH1	2
γ-linolenate Biosynthesis II (Animals)	0.518	0.118	NaN	SLC27A2,ACSL4	0
Dermatan Sulfate Degradation (Metazoa)	0.518	0.118	NaN	TMEM2,GM2A	0
Mitochondrial L-carnitine Shuttle Pathway	0.518	0.118	NaN	SLC27A2,ACSL4	0
MIF Regulation of Innate Immunity	0.517	0.093	0	PLA2G4A,MAPK3,PTGS2,PLA2G12A	2
TNFR2 Signaling	0.511	0.1	NaN	TANK,TNFAIP3,TRAF1	1
Atherosclerosis Signaling	0.509	0.0787	NaN	PAFAH1B2,PLA2G4A,MMP3,SERPINA1,PCYOX1,F3,PDGFB,CLU,TNFRSF12A,PLA2G12A	2
Tec Kinase Signaling	0.509	0.0765	-0.707	GNG4,PIK3R3,GNAI3,GNB4,JAK1,PIK3C2A,FGFR1,ITGA2,GNA11,GNB5,ITGA5,PRKCE,FNBP1	2
GPCR-Mediated Nutrient Sensing in Enteroendocrine Cells	0.49	0.0814	NaN	PRKACB,GNG4,GNAI3,PRKAR2B,GNA11,PRKAR2A,PRKCE	0
Differential Regulation of Cytokine Production in Macrophages and T Helper Cells by IL-17A and IL-17F	0.485	0.111	NaN	CCL5,CSF2	0
Urea Cycle	0.48	0.167	NaN	CPS1	0
Chondroitin and Dermatan Biosynthesis	0.48	0.167	NaN	CHSY1	0
Glycerol Degradation I	0.48	0.167	NaN	GPD2	0
Glycine Cleavage Complex	0.48	0.167	NaN	DLD	0
Selenocysteine Biosynthesis II (Archaea and Eukaryotes)	0.48	0.167	NaN	SEPSECS	0
UDP-N-acetyl-D-glucosamine Biosynthesis II	0.48	0.167	NaN	GFPT1	0
Zymosterol Biosynthesis	0.48	0.167	NaN	LBR	0
Rapoport-Luebering Glycolytic Shunt	0.48	0.167	NaN	TIGAR	0
GNRH Signaling	0.479	0.0764	-0.632	PRKACB,DNM1,GNAI3,PRKAR2B,CDC42,MAPK3,GNA11,PRKAR2A,PRKCE,CREB5,EGFR	3
IL-9 Signaling	0.477	0.0889	-1	PIK3R3,JAK1,PIK3C2A,FGFR1	2
Role of IL-17F in Allergic Inflammatory Airway Diseases	0.477	0.0889	-2	MAPK3,RPS6KA1,CREB5,CSF2	1
G Protein Signaling Mediated by Tubby	0.463	0.0938	NaN	GNG4,GNB4,GNB5	0
Bladder Cancer Signaling	0.462	0.0795	NaN	MMP3,THBS1,MMP14,MAPK3,VEGFC,CCND1,EGFR	5
Endothelin-1 Signaling	0.456	0.0737	-1.069	PAFAH1B2,NAPEPLD,PIK3C2A,FGFR1,GNA11,MAPK6,PIK3R3,PLA2G4A,GNAI3,EDN1,MAPK3,PRKCE,PTGS2,PLA2G12A	3
Heparan Sulfate Biosynthesis (Late Stages)	0.445	0.08	NaN	PPME1,HS2ST1,CES2,AARS,EXTL2,NDST1	0
HMGB1 Signaling	0.442	0.0752	-0.632	HMGB1,PIK3R3,PIK3C2A,CDC42,MAPK3,FGFR1,AKT3,CSF2,FNBP1,MAP2K5	4
SAPK/JNK Signaling	0.441	0.0769	0	PIK3R3,TRADD,PIK3C2A,CDC42,NFATC3,FGFR1,MAP3K20,CRK	2
GP6 Signaling Pathway	0.431	0.0746	-1.265	PIK3R3,PIK3C2A,SCHIP1,COL12A1,FGFR1,AKT3,PDPK1,PRKCE,GSK3B,ITGB3	2
Ceramide Biosynthesis	0.426	0.143	NaN	SPTLC1	0
Thioredoxin Pathway	0.426	0.143	NaN	NXN	0
Pentose Phosphate Pathway (Non-oxidative Branch)	0.426	0.143	NaN	TKT	0
Phosphatidylcholine Biosynthesis I	0.426	0.143	NaN	PHKA1	0
Acetyl-CoA Biosynthesis I (Pyruvate Dehydrogenase Complex)	0.426	0.143	NaN	DLD	0
Phospholipases	0.426	0.0806	NaN	PAFAH1B2,PLA2G4A,NAPEPLD,LIPC,PLA2G12A	0
Granzyme A Signaling	0.425	0.1	NaN	H1FX,HMGB2	0
p38 MAPK Signaling	0.425	0.075	-0.378	PLA2G4A,TRADD,TIFA,H3F3A/H3F3B,RPS6KA1,CREB5,IL1RAP,PLA2G12A,IRAK1	1
Dopamine Receptor Signaling	0.417	0.0779	0	PRKACB,PRKAR2B,PPP1R7,PRKAR2A,PPP2R1B,PPP2R5A	0
Factors Promoting Cardiogenesis in Vertebrates	0.411	0.0761	NaN	SMAD2,CCNE2,WNT3,PRKCE,SMAD5,GSK3B,ACVR2A	2
Renin-Angiotensin Signaling	0.404	0.0738	-1	PRKACB,PIK3R3,PRKAR2B,PIK3C2A,MAPK3,FGFR1,PRKAR2A,PRKCE,CCL5	2
Role of Pattern Recognition Receptors in Recognition of Bacteria and Viruses	0.401	0.073	-2.121	PTX3,TLR2,PIK3R3,PIK3C2A,MAPK3,FGFR1,PRKCE,CCL5,CSF2,EIF2S1	3
TWEAK Signaling	0.4	0.0857	NaN	TRADD,TRAF1,TNFRSF12A	0
Endoplasmic Reticulum Stress Pathway	0.399	0.0952	NaN	EIF2S1,TAOK3	1
Actin Cytoskeleton Signaling	0.396	0.0705	-1.069	ACTR2,PIK3C2A,FGFR1,ITGA2,WASL,ITGA5,PIP4K2B,CRK,PDGFB,PIK3R3,CFL2,CDC42,CYFIP1,MAPK3,VCL,PIP4K2C	3
TNFR1 Signaling	0.389	0.08	NaN	TANK,TRADD,CDC42,TNFAIP3	2
RhoA Signaling	0.384	0.0726	-0.378	ARHGAP5,ACTR2,NEDD4,ABL2,CFL2,ANLN,PIP4K2B,SEPT2,PIP4K2C	0
Thrombopoietin Signaling	0.382	0.0769	-1.342	PIK3R3,PIK3C2A,MAPK3,FGFR1,PRKCE	2
Airway Pathology in Chronic Obstructive Pulmonary Disease	0.382	0.125	NaN	CXCL3	0
Histidine Degradation III	0.382	0.125	NaN	MTHFD2	0
Inositol Pyrophosphates Biosynthesis	0.382	0.125	NaN	PPIP5K2	0
Sphingomyelin Metabolism	0.382	0.125	NaN	SGMS1	0
Polyamine Regulation in Colon Cancer	0.374	0.0909	NaN	PSMF1,PSME4	0
Fatty Acid α-oxidation	0.374	0.0909	NaN	ALDH1A3,PTGS2	1
Methionine Degradation I (to Homocysteine)	0.374	0.0909	NaN	EEF1AKMT3,SUV39H2	0
G-Protein Coupled Receptor Signaling	0.369	0.0688	NaN	PRKACB,RGS2,NAPEPLD,PIK3C2A,FGFR1,GNA11,PRKAR2A,PDPK1,CREB5,RAP1A,PIK3R3,LAMTOR3,GNAI3,PRKAR2B,NPR3,MAPK3,PRKCE,AKT3,RPS6KA1	3
Role of NFAT in Regulation of the Immune Response	0.365	0.0699	-1.897	GNG4,PIK3C2A,NFATC3,FGFR1,GNA11,GNB5,PIK3R3,GNB4,GNAI3,MAPK3,AKT3,NFATC2,GSK3B	4
Amyotrophic Lateral Sclerosis Signaling	0.365	0.0721	NaN	PIK3R3,RAB5A,PIK3C2A,FGFR1,CAT,VEGFC,AKT3,ALS2	2
FXR/RXR Activation	0.364	0.0714	NaN	SDC1,LIPC,FOXO1,PCK2,SAA1,AKT3,SERPINA1,PCYOX1,CLU	0
Heparan Sulfate Biosynthesis	0.355	0.0732	NaN	PPME1,HS2ST1,CES2,AARS,EXTL2,NDST1	0
Differential Regulation of Cytokine Production in Intestinal Epithelial Cells by IL-17A and IL-17F	0.352	0.087	NaN	CCL5,CSF2	0
Pyrimidine Deoxyribonucleotides De Novo Biosynthesis I	0.352	0.087	NaN	NME2,AK4	0
IL-6 Signaling	0.346	0.0703	-1.667	IL6ST,PIK3R3,CSNK2A2,TNFAIP6,PIK3C2A,MAPK3,FGFR1,AKT3,IL1RAP	3
FcγRIIB Signaling in B Lymphocytes	0.344	0.0755	0	PIK3R3,PIK3C2A,FGFR1,PDPK1	1
Phototransduction Pathway	0.344	0.0755	NaN	PRKACB,PRKAR2B,PRKAR2A,GNB5	0
Thrombin Signaling	0.344	0.0686	-1.265	GNG4,PIK3C2A,FGFR1,GNA11,GNB5,PDPK1,PIK3R3,GNB4,GNAI3,MAPK3,PRKCE,AKT3,FNBP1,EGFR	3
Pathogenesis of Multiple Sclerosis	0.344	0.111	NaN	CCL5	0
Prostanoid Biosynthesis	0.344	0.111	NaN	PTGS2	1
Citrulline Biosynthesis	0.344	0.111	NaN	GLS	0
Heme Biosynthesis II	0.344	0.111	NaN	ALAD	0
Glutathione Redox Reactions I	0.331	0.0833	NaN	GPX8,MGST3	0
April Mediated Signaling	0.329	0.0769	NaN	NFATC3,NFATC2,TRAF1	1
PI3K Signaling in B Lymphocytes	0.328	0.0692	-1.134	ATF3,NFATC3,MAPK3,FOXO3,NFATC2,AKT3,PDPK1,PLEKHA1,PTEN	3
IL-12 Signaling and Production in Macrophages	0.322	0.0685	NaN	TLR2,PIK3R3,PIK3C2A,MAPK3,FGFR1,AKT3,PRKCE,SERPINA1,PCYOX1,CLU	2
Thyroid Cancer Signaling	0.314	0.075	NaN	MAPK3,NGF,CCND1	2
CD28 Signaling in T Helper Cells	0.312	0.0682	-1	PIK3R3,ACTR2,PIK3C2A,CDC42,NFATC3,FGFR1,NFATC2,AKT3,PDPK1	3
Calcium Transport I	0.311	0.1	NaN	ATP2B1	0
Ketolysis	0.311	0.1	NaN	OXCT1	0
GDP-glucose Biosynthesis	0.311	0.1	NaN	PGM2L1	0
Glycine Betaine Degradation	0.311	0.1	NaN	SHMT1	0
Ethanol Degradation IV	0.311	0.08	NaN	ALDH1A3,CAT	0
Role of JAK1 and JAK3 in γc Cytokine Signaling	0.308	0.0704	NaN	PIK3R3,JAK1,PIK3C2A,MAPK3,FGFR1	3
Synaptic Long Term Depression	0.306	0.0676	0	PAFAH1B2,GNAI3,PLA2G4A,NPR3,MAPK3,GNA11,PRKCE,PPP2R1B,PPP2R5A,PLA2G12A	1
Phagosome Maturation	0.306	0.0676	NaN	ATP6V0A4,RAB5A,TUBA1A,TUBE1,VPS41,DYNLT1,VTI1B,BET1L,TSG101,NAPB	1
Dopamine-DARPP32 Feedback in cAMP Signaling	0.302	0.0671	-0.302	PRKACB,GNAI3,PRKAR2B,KCNJ2,KCNJ14,PPP1R7,PRKAR2A,PRKCE,CREB5,PPP2R1B,PPP2R5A	0
LPS-stimulated MAPK Signaling	0.302	0.069	-0.816	PIK3R3,PIK3C2A,CDC42,MAPK3,FGFR1,PRKCE	3
PEDF Signaling	0.302	0.069	-1.633	PIK3R3,PIK3C2A,MAPK3,FGFR1,AKT3,NGF	2
B Cell Activating Factor Signaling	0.299	0.0732	NaN	NFATC3,NFATC2,TRAF1	1
Th2 Pathway	0.292	0.0667	-1.667	PIK3R3,NOTCH2,JAK1,PIK3C2A,BHLHE41,FGFR1,NFATC2,APH1B,JAG1,ACVR2A	5
GPCR-Mediated Integration of Enteroendocrine Signaling Exemplified by an L Cell	0.287	0.0685	NaN	PRKACB,GNAI3,PRKAR2B,GNA11,PRKAR2A	0
Assembly of RNA Polymerase I Complex	0.282	0.0909	NaN	POLR1D	0
Glucose and Glucose-1-phosphate Degradation	0.282	0.0909	NaN	PGM2L1	0
Pentose Phosphate Pathway	0.282	0.0909	NaN	TKT	0
Purine Nucleotides De Novo Biosynthesis II	0.282	0.0909	NaN	ADSS	0
Dolichyl-diphosphooligosaccharide Biosynthesis	0.282	0.0909	NaN	ALG5	0
UDP-N-acetyl-D-galactosamine Biosynthesis II	0.282	0.0909	NaN	GNPDA2	0
D-myo-inositol (1,4,5)-Trisphosphate Biosynthesis	0.276	0.0741	NaN	PIP4K2B,PIP4K2C	0
Role of p14/p19ARF in Tumor Suppression	0.272	0.0698	NaN	PIK3R3,PIK3C2A,FGFR1	1
UVC-Induced MAPK Signaling	0.272	0.0698	NaN	MAPK3,PRKCE,EGFR	2
GDNF Family Ligand-Receptor Interactions	0.257	0.0658	-0.447	PIK3R3,PIK3C2A,CDC42,MAPK3,FGFR1	3
Serotonin Degradation	0.257	0.0658	NaN	ADH5,UGT2B7,DHRS2,ALDH1A3,PECR	0
Toll-like Receptor Signaling	0.257	0.0658	1	TLR2,TICAM2,TNFAIP3,TRAF1,IRAK1	2
Hematopoiesis from Multipotent Stem Cells	0.257	0.0833	NaN	CSF2	0
Acyl-CoA Hydrolysis	0.257	0.0833	NaN	ACOT4	0
Induction of Apoptosis by HIV1	0.248	0.0656	-1	TRADD,SLC25A13,BBC3,TRAF1	1
Pyrimidine Ribonucleotides Interconversion	0.247	0.0667	NaN	NME2,AK4,ENTPD7	0
Acetone Degradation I (to Methylglyoxal)	0.245	0.069	NaN	ZADH2,CYP2J2	0
Role of IL-17A in Psoriasis	0.235	0.0769	NaN	CXCL3	0
Mevalonate Pathway I	0.235	0.0769	NaN	PMVK	0
Androgen Biosynthesis	0.215	0.0714	NaN	SRD5A1	0
Phenylalanine Degradation IV (Mammalian, via Side Chain)	0.215	0.0714	NaN	SLC27A2	0
γ-glutamyl Cycle	0.215	0.0714	NaN	CHAC1	0

## Sheet: Detail
Ingenuity Canonical Pathways	-log(p-value)	Ratio	z-score	Molecules	Entrez Gene Name	Location	Type(s)	Corrected_p-value	P value	Regulation	FCAbsolute	Fold_Change	Log_FC
Hereditary Breast Cancer Signaling	5.24	0.174	NaN	BARD1	BRCA1 associated RING domain 1	Nucleus	transcription regulator	9.61707e-09	2.2338e-10	down	1.60671	-1.60671	-0.684113
Hereditary Breast Cancer Signaling	5.24	0.174	NaN	CCND1	cyclin D1	Nucleus	transcription regulator	6.00024e-10	5.95338e-12	down	2.30478	-2.30478	-1.20463
Hereditary Breast Cancer Signaling	5.24	0.174	NaN	PTEN	phosphatase and tensin homolog	Cytoplasm	phosphatase	4.30522e-08	1.52354e-09	down	2.05755	-2.05755	-1.04093
Hereditary Breast Cancer Signaling	5.24	0.174	NaN	HDAC11	histone deacetylase 11	Nucleus	transcription regulator	2.48377e-07	1.3396e-08	up	1.67911	1.67911	0.7477
Hereditary Breast Cancer Signaling	5.24	0.174	NaN	AKT3	AKT serine/threonine kinase 3	Cytoplasm	kinase	6.87797e-06	7.27745e-07	down	1.6577	-1.6577	-0.72918
Hereditary Breast Cancer Signaling	5.24	0.174	NaN	BRCA1	BRCA1, DNA repair associated	Nucleus	transcription regulator	2.40849e-06	2.07963e-07	down	1.52917	-1.52917	-0.612753
Hereditary Breast Cancer Signaling	5.24	0.174	NaN	POLR2L	RNA polymerase II subunit L	Nucleus	enzyme	3.57128e-10	2.89831e-12	up	1.50329	1.50329	0.58812
Hereditary Breast Cancer Signaling	5.24	0.174	NaN	POLR2I	RNA polymerase II subunit I	Nucleus	transcription regulator	5.00112e-11	1.85759e-13	up	1.70927	1.70927	0.77338
Hereditary Breast Cancer Signaling	5.24	0.174	NaN	HDAC9	histone deacetylase 9	Nucleus	transcription regulator	5.91691e-05	9.14022e-06	up	1.76391	1.76391	0.818777
Hereditary Breast Cancer Signaling	5.24	0.174	NaN	CDC25C	cell division cycle 25C	Nucleus	phosphatase	1.99828e-07	1.02438e-08	down	1.53353	-1.53353	-0.616857
Hereditary Breast Cancer Signaling	5.24	0.174	NaN	HDAC4	histone deacetylase 4	Nucleus	transcription regulator	3.86368e-06	3.6767e-07	down	1.71516	-1.71516	-0.778347
Hereditary Breast Cancer Signaling	5.24	0.174	NaN	HDAC8	histone deacetylase 8	Nucleus	transcription regulator	7.9917e-07	5.57286e-08	down	1.8522	-1.8522	-0.889243
Hereditary Breast Cancer Signaling	5.24	0.174	NaN	PIK3C2A	phosphatidylinositol-4-phosphate 3-kinase catalytic subunit type 2 alpha	Cytoplasm	kinase	2.82584e-06	2.52843e-07	down	1.59286	-1.59286	-0.671617
Hereditary Breast Cancer Signaling	5.24	0.174	NaN	FGFR1	fibroblast growth factor receptor 1	Plasma Membrane	kinase	0.000247191	4.8071e-05	up	1.50868	1.50868	0.59329
Hereditary Breast Cancer Signaling	5.24	0.174	NaN	CDK6	cyclin dependent kinase 6	Nucleus	kinase	1.75382e-10	1.12439e-12	down	1.96768	-1.96768	-0.976497
Hereditary Breast Cancer Signaling	5.24	0.174	NaN	SMARCE1	SWI/SNF related, matrix associated, actin dependent regulator of chromatin, subfamily e, member 1	Nucleus	transcription regulator	1.8058e-09	2.67377e-11	up	2.03758	2.03758	1.02685
Hereditary Breast Cancer Signaling	5.24	0.174	NaN	RFC5	replication factor C subunit 5	Nucleus	enzyme	7.82776e-12	1.31435e-14	down	2.7852	-2.7852	-1.47778
Hereditary Breast Cancer Signaling	5.24	0.174	NaN	PIK3R3	phosphoinositide-3-kinase regulatory subunit 3	Cytoplasm	kinase	8.33611e-08	3.4717e-09	down	1.6323	-1.6323	-0.706907
Hereditary Breast Cancer Signaling	5.24	0.174	NaN	SMARCA2	SWI/SNF related, matrix associated, actin dependent regulator of chromatin, subfamily a, member 2	Nucleus	transcription regulator	1.06045e-07	4.71855e-09	down	1.55412	-1.55412	-0.636097
Hereditary Breast Cancer Signaling	5.24	0.174	NaN	H2AFX	H2A histone family member X	Nucleus	transcription regulator	6.98264e-11	3.15668e-13	down	1.55466	-1.55466	-0.636597
Hereditary Breast Cancer Signaling	5.24	0.174	NaN	MRE11	MRE11 homolog, double strand break repair nuclease	Nucleus	enzyme	1.56027e-05	1.92558e-06	down	1.56939	-1.56939	-0.650207
Hereditary Breast Cancer Signaling	5.24	0.174	NaN	SMARCC1	SWI/SNF related, matrix associated, actin dependent regulator of chromatin subfamily c member 1	Nucleus	transcription regulator	1.14545e-10	6.41563e-13	up	2.12213	2.12213	1.08551
Hereditary Breast Cancer Signaling	5.24	0.174	NaN	FANCA	Fanconi anemia complementation group A	Nucleus	other	1.5187e-07	7.37191e-09	down	1.60665	-1.60665	-0.68406
Hereditary Breast Cancer Signaling	5.24	0.174	NaN	RFC3	replication factor C subunit 3	Nucleus	enzyme	1.72716e-08	4.78508e-10	down	1.51502	-1.51502	-0.599333
Hereditary Breast Cancer Signaling	5.24	0.174	NaN	PHF10	PHD finger protein 10	Nucleus	other	1.25289e-09	1.64154e-11	up	2.33051	2.33051	1.22064
Insulin Receptor Signaling	4.9	0.17	0.209	PRKACB	protein kinase cAMP-activated catalytic subunit beta	Cytoplasm	kinase	3.85749e-08	1.31897e-09	down	2.07728	-2.07728	-1.0547
Insulin Receptor Signaling	4.9	0.17	0.209	JAK1	Janus kinase 1	Cytoplasm	kinase	1.06066e-06	7.81996e-08	down	1.54581	-1.54581	-0.62836
Insulin Receptor Signaling	4.9	0.17	0.209	BAD	BCL2 associated agonist of cell death	Cytoplasm	other	1.34915e-08	3.45293e-10	up	1.5081	1.5081	0.59273
Insulin Receptor Signaling	4.9	0.17	0.209	PIK3C2A	phosphatidylinositol-4-phosphate 3-kinase catalytic subunit type 2 alpha	Cytoplasm	kinase	2.82584e-06	2.52843e-07	down	1.59286	-1.59286	-0.671617
Insulin Receptor Signaling	4.9	0.17	0.209	FGFR1	fibroblast growth factor receptor 1	Plasma Membrane	kinase	0.000247191	4.8071e-05	up	1.50868	1.50868	0.59329
Insulin Receptor Signaling	4.9	0.17	0.209	PRKAR2A	protein kinase cAMP-dependent type II regulatory subunit alpha	Cytoplasm	kinase	1.6572e-09	2.35652e-11	up	1.61798	1.61798	0.694197
Insulin Receptor Signaling	4.9	0.17	0.209	PDPK1	3-phosphoinositide dependent protein kinase 1	Cytoplasm	kinase	1.1086e-07	4.99204e-09	up	1.65403	1.65403	0.725987
Insulin Receptor Signaling	4.9	0.17	0.209	CRK	CRK proto-oncogene, adaptor protein	Cytoplasm	other	2.44547e-11	7.27911e-14	down	1.87964	-1.87964	-0.91046
Insulin Receptor Signaling	4.9	0.17	0.209	EIF4E	eukaryotic translation initiation factor 4E	Cytoplasm	translation regulator	1.1558e-09	1.44963e-11	down	2.9448	-2.9448	-1.55817
Insulin Receptor Signaling	4.9	0.17	0.209	PTPRF	protein tyrosine phosphatase, receptor type F	Plasma Membrane	phosphatase	7.40141e-10	7.98532e-12	down	1.71825	-1.71825	-0.780943
Insulin Receptor Signaling	4.9	0.17	0.209	GRB10	growth factor receptor bound protein 10	Cytoplasm	other	7.40141e-10	7.96753e-12	up	2.31475	2.31475	1.21085
Insulin Receptor Signaling	4.9	0.17	0.209	PTEN	phosphatase and tensin homolog	Cytoplasm	phosphatase	4.30522e-08	1.52354e-09	down	2.05755	-2.05755	-1.04093
Insulin Receptor Signaling	4.9	0.17	0.209	PIK3R3	phosphoinositide-3-kinase regulatory subunit 3	Cytoplasm	kinase	8.33611e-08	3.4717e-09	down	1.6323	-1.6323	-0.706907
Insulin Receptor Signaling	4.9	0.17	0.209	MTOR	mechanistic target of rapamycin	Nucleus	kinase	2.15174e-08	6.28984e-10	up	1.65752	1.65752	0.729023
Insulin Receptor Signaling	4.9	0.17	0.209	PRKAR2B	protein kinase cAMP-dependent type II regulatory subunit beta	Cytoplasm	kinase	1.11727e-05	1.29359e-06	up	1.57564	1.57564	0.655937
Insulin Receptor Signaling	4.9	0.17	0.209	FOXO1	forkhead box O1	Nucleus	transcription regulator	1.76954e-08	4.93401e-10	down	1.83353	-1.83353	-0.87462
Insulin Receptor Signaling	4.9	0.17	0.209	PPP1R7	protein phosphatase 1 regulatory subunit 7	Nucleus	phosphatase	1.91811e-08	5.46051e-10	up	1.51893	1.51893	0.603057
Insulin Receptor Signaling	4.9	0.17	0.209	MAPK3	mitogen-activated protein kinase 3	Cytoplasm	kinase	4.35448e-07	2.63697e-08	down	1.70674	-1.70674	-0.77124
Insulin Receptor Signaling	4.9	0.17	0.209	FOXO3	forkhead box O3	Nucleus	transcription regulator	6.36945e-09	1.34477e-10	down	1.57783	-1.57783	-0.657943
Insulin Receptor Signaling	4.9	0.17	0.209	EIF2B1	eukaryotic translation initiation factor 2B subunit alpha	Cytoplasm	translation regulator	1.06938e-07	4.77877e-09	up	1.5176	1.5176	0.60179
Insulin Receptor Signaling	4.9	0.17	0.209	ASIC1	acid sensing ion channel subunit 1	Plasma Membrane	ion channel	8.52179e-08	3.57071e-09	up	1.69357	1.69357	0.760067
Insulin Receptor Signaling	4.9	0.17	0.209	AKT3	AKT serine/threonine kinase 3	Cytoplasm	kinase	6.87797e-06	7.27745e-07	down	1.6577	-1.6577	-0.72918
Insulin Receptor Signaling	4.9	0.17	0.209	STX4	syntaxin 4	Plasma Membrane	transporter	1.00265e-07	4.36953e-09	down	1.65824	-1.65824	-0.72965
Insulin Receptor Signaling	4.9	0.17	0.209	GSK3B	glycogen synthase kinase 3 beta	Nucleus	kinase	2.55367e-07	1.38835e-08	up	1.64288	1.64288	0.71623
IGF-1 Signaling	4.86	0.189	-0.277	PRKACB	protein kinase cAMP-activated catalytic subunit beta	Cytoplasm	kinase	3.85749e-08	1.31897e-09	down	2.07728	-2.07728	-1.0547
IGF-1 Signaling	4.86	0.189	-0.277	IGFBP6	insulin like growth factor binding protein 6	Extracellular Space	other	8.68772e-08	3.66013e-09	down	1.55626	-1.55626	-0.638083
IGF-1 Signaling	4.86	0.189	-0.277	IGFBP4	insulin like growth factor binding protein 4	Extracellular Space	other	5.41824e-09	1.08483e-10	down	2.12973	-2.12973	-1.09067
IGF-1 Signaling	4.86	0.189	-0.277	NEDD4	neural precursor cell expressed, developmentally down-regulated 4, E3 ubiquitin protein ligase	Cytoplasm	enzyme	9.05081e-09	2.07464e-10	up	1.72618	1.72618	0.78758
IGF-1 Signaling	4.86	0.189	-0.277	YWHAG	tyrosine 3-monooxygenase/tryptophan 5-monooxygenase activation protein gamma	Cytoplasm	other	3.50366e-08	1.1649e-09	down	1.75089	-1.75089	-0.808087
IGF-1 Signaling	4.86	0.189	-0.277	JAK1	Janus kinase 1	Cytoplasm	kinase	1.06066e-06	7.81996e-08	down	1.54581	-1.54581	-0.62836
IGF-1 Signaling	4.86	0.189	-0.277	PIK3C2A	phosphatidylinositol-4-phosphate 3-kinase catalytic subunit type 2 alpha	Cytoplasm	kinase	2.82584e-06	2.52843e-07	down	1.59286	-1.59286	-0.671617
IGF-1 Signaling	4.86	0.189	-0.277	BAD	BCL2 associated agonist of cell death	Cytoplasm	other	1.34915e-08	3.45293e-10	up	1.5081	1.5081	0.59273
IGF-1 Signaling	4.86	0.189	-0.277	FGFR1	fibroblast growth factor receptor 1	Plasma Membrane	kinase	0.000247191	4.8071e-05	up	1.50868	1.50868	0.59329
IGF-1 Signaling	4.86	0.189	-0.277	PRKAR2A	protein kinase cAMP-dependent type II regulatory subunit alpha	Cytoplasm	kinase	1.6572e-09	2.35652e-11	up	1.61798	1.61798	0.694197
IGF-1 Signaling	4.86	0.189	-0.277	YWHAZ	tyrosine 3-monooxygenase/tryptophan 5-monooxygenase activation protein zeta	Cytoplasm	enzyme	2.82601e-10	2.16809e-12	down	1.5975	-1.5975	-0.67582
IGF-1 Signaling	4.86	0.189	-0.277	PDPK1	3-phosphoinositide dependent protein kinase 1	Cytoplasm	kinase	1.1086e-07	4.99204e-09	up	1.65403	1.65403	0.725987
IGF-1 Signaling	4.86	0.189	-0.277	GRB10	growth factor receptor bound protein 10	Cytoplasm	other	7.40141e-10	7.96753e-12	up	2.31475	2.31475	1.21085
IGF-1 Signaling	4.86	0.189	-0.277	PIK3R3	phosphoinositide-3-kinase regulatory subunit 3	Cytoplasm	kinase	8.33611e-08	3.4717e-09	down	1.6323	-1.6323	-0.706907
IGF-1 Signaling	4.86	0.189	-0.277	CSNK2A2	casein kinase 2 alpha 2	Cytoplasm	kinase	6.838e-06	7.22554e-07	up	1.75656	1.75656	0.812757
IGF-1 Signaling	4.86	0.189	-0.277	PRKAR2B	protein kinase cAMP-dependent type II regulatory subunit beta	Cytoplasm	kinase	1.11727e-05	1.29359e-06	up	1.57564	1.57564	0.655937
IGF-1 Signaling	4.86	0.189	-0.277	FOXO1	forkhead box O1	Nucleus	transcription regulator	1.76954e-08	4.93401e-10	down	1.83353	-1.83353	-0.87462
IGF-1 Signaling	4.86	0.189	-0.277	MAPK3	mitogen-activated protein kinase 3	Cytoplasm	kinase	4.35448e-07	2.63697e-08	down	1.70674	-1.70674	-0.77124
IGF-1 Signaling	4.86	0.189	-0.277	FOXO3	forkhead box O3	Nucleus	transcription regulator	6.36945e-09	1.34477e-10	down	1.57783	-1.57783	-0.657943
IGF-1 Signaling	4.86	0.189	-0.277	AKT3	AKT serine/threonine kinase 3	Cytoplasm	kinase	6.87797e-06	7.27745e-07	down	1.6577	-1.6577	-0.72918
Neuregulin Signaling	4.36	0.193	-0.277	BAD	BCL2 associated agonist of cell death	Cytoplasm	other	1.34915e-08	3.45293e-10	up	1.5081	1.5081	0.59273
Neuregulin Signaling	4.36	0.193	-0.277	ITGA2	integrin subunit alpha 2	Plasma Membrane	transmembrane receptor	1.38403e-07	6.53158e-09	up	1.86016	1.86016	0.895423
Neuregulin Signaling	4.36	0.193	-0.277	ITGA5	integrin subunit alpha 5	Plasma Membrane	transmembrane receptor	2.35836e-10	1.66796e-12	down	2.56143	-2.56143	-1.35695
Neuregulin Signaling	4.36	0.193	-0.277	PDPK1	3-phosphoinositide dependent protein kinase 1	Cytoplasm	kinase	1.1086e-07	4.99204e-09	up	1.65403	1.65403	0.725987
Neuregulin Signaling	4.36	0.193	-0.277	ERBB3	erb-b2 receptor tyrosine kinase 3	Plasma Membrane	kinase	3.01109e-07	1.69449e-08	up	1.67148	1.67148	0.741127
Neuregulin Signaling	4.36	0.193	-0.277	CRK	CRK proto-oncogene, adaptor protein	Cytoplasm	other	2.44547e-11	7.27911e-14	down	1.87964	-1.87964	-0.91046
Neuregulin Signaling	4.36	0.193	-0.277	PTEN	phosphatase and tensin homolog	Cytoplasm	phosphatase	4.30522e-08	1.52354e-09	down	2.05755	-2.05755	-1.04093
Neuregulin Signaling	4.36	0.193	-0.277	PIK3R3	phosphoinositide-3-kinase regulatory subunit 3	Cytoplasm	kinase	8.33611e-08	3.4717e-09	down	1.6323	-1.6323	-0.706907
Neuregulin Signaling	4.36	0.193	-0.277	NRG1	neuregulin 1	Plasma Membrane	growth factor	3.52503e-10	2.84582e-12	down	1.97673	-1.97673	-0.983117
Neuregulin Signaling	4.36	0.193	-0.277	MTOR	mechanistic target of rapamycin	Nucleus	kinase	2.15174e-08	6.28984e-10	up	1.65752	1.65752	0.729023
Neuregulin Signaling	4.36	0.193	-0.277	MAPK3	mitogen-activated protein kinase 3	Cytoplasm	kinase	4.35448e-07	2.63697e-08	down	1.70674	-1.70674	-0.77124
Neuregulin Signaling	4.36	0.193	-0.277	TGFA	transforming growth factor alpha	Extracellular Space	growth factor	2.67995e-08	8.35203e-10	up	1.97187	1.97187	0.979563
Neuregulin Signaling	4.36	0.193	-0.277	HSP90AA1	heat shock protein 90 alpha family class A member 1	Cytoplasm	enzyme	7.40107e-10	7.894e-12	up	1.62731	1.62731	0.70249
Neuregulin Signaling	4.36	0.193	-0.277	PRKCE	protein kinase C epsilon	Cytoplasm	kinase	5.22833e-10	4.84166e-12	down	2.01678	-2.01678	-1.01205
Neuregulin Signaling	4.36	0.193	-0.277	AKT3	AKT serine/threonine kinase 3	Cytoplasm	kinase	6.87797e-06	7.27745e-07	down	1.6577	-1.6577	-0.72918
Neuregulin Signaling	4.36	0.193	-0.277	EREG	epiregulin	Extracellular Space	growth factor	1.77171e-09	2.60092e-11	up	1.6041	1.6041	0.681767
Neuregulin Signaling	4.36	0.193	-0.277	EGFR	epidermal growth factor receptor	Plasma Membrane	kinase	7.80544e-08	3.18516e-09	down	1.65723	-1.65723	-0.728773
PI3K/AKT Signaling	4.28	0.168	-1.147	YWHAG	tyrosine 3-monooxygenase/tryptophan 5-monooxygenase activation protein gamma	Cytoplasm	other	3.50366e-08	1.1649e-09	down	1.75089	-1.75089	-0.808087
PI3K/AKT Signaling	4.28	0.168	-1.147	JAK1	Janus kinase 1	Cytoplasm	kinase	1.06066e-06	7.81996e-08	down	1.54581	-1.54581	-0.62836
PI3K/AKT Signaling	4.28	0.168	-1.147	BAD	BCL2 associated agonist of cell death	Cytoplasm	other	1.34915e-08	3.45293e-10	up	1.5081	1.5081	0.59273
PI3K/AKT Signaling	4.28	0.168	-1.147	ITGA2	integrin subunit alpha 2	Plasma Membrane	transmembrane receptor	1.38403e-07	6.53158e-09	up	1.86016	1.86016	0.895423
PI3K/AKT Signaling	4.28	0.168	-1.147	YWHAZ	tyrosine 3-monooxygenase/tryptophan 5-monooxygenase activation protein zeta	Cytoplasm	enzyme	2.82601e-10	2.16809e-12	down	1.5975	-1.5975	-0.67582
PI3K/AKT Signaling	4.28	0.168	-1.147	ITGA5	integrin subunit alpha 5	Plasma Membrane	transmembrane receptor	2.35836e-10	1.66796e-12	down	2.56143	-2.56143	-1.35695
PI3K/AKT Signaling	4.28	0.168	-1.147	PDPK1	3-phosphoinositide dependent protein kinase 1	Cytoplasm	kinase	1.1086e-07	4.99204e-09	up	1.65403	1.65403	0.725987
PI3K/AKT Signaling	4.28	0.168	-1.147	CCND1	cyclin D1	Nucleus	transcription regulator	6.00024e-10	5.95338e-12	down	2.30478	-2.30478	-1.20463
PI3K/AKT Signaling	4.28	0.168	-1.147	EIF4E	eukaryotic translation initiation factor 4E	Cytoplasm	translation regulator	1.1558e-09	1.44963e-11	down	2.9448	-2.9448	-1.55817
PI3K/AKT Signaling	4.28	0.168	-1.147	PPP2R5A	protein phosphatase 2 regulatory subunit B'alpha	Cytoplasm	phosphatase	4.36257e-10	3.81011e-12	up	1.99923	1.99923	0.999443
PI3K/AKT Signaling	4.28	0.168	-1.147	PTEN	phosphatase and tensin homolog	Cytoplasm	phosphatase	4.30522e-08	1.52354e-09	down	2.05755	-2.05755	-1.04093
PI3K/AKT Signaling	4.28	0.168	-1.147	PIK3R3	phosphoinositide-3-kinase regulatory subunit 3	Cytoplasm	kinase	8.33611e-08	3.4717e-09	down	1.6323	-1.6323	-0.706907
PI3K/AKT Signaling	4.28	0.168	-1.147	MTOR	mechanistic target of rapamycin	Nucleus	kinase	2.15174e-08	6.28984e-10	up	1.65752	1.65752	0.729023
PI3K/AKT Signaling	4.28	0.168	-1.147	FOXO1	forkhead box O1	Nucleus	transcription regulator	1.76954e-08	4.93401e-10	down	1.83353	-1.83353	-0.87462
PI3K/AKT Signaling	4.28	0.168	-1.147	MAPK3	mitogen-activated protein kinase 3	Cytoplasm	kinase	4.35448e-07	2.63697e-08	down	1.70674	-1.70674	-0.77124
PI3K/AKT Signaling	4.28	0.168	-1.147	FOXO3	forkhead box O3	Nucleus	transcription regulator	6.36945e-09	1.34477e-10	down	1.57783	-1.57783	-0.657943
PI3K/AKT Signaling	4.28	0.168	-1.147	HSP90AA1	heat shock protein 90 alpha family class A member 1	Cytoplasm	enzyme	7.40107e-10	7.894e-12	up	1.62731	1.62731	0.70249
PI3K/AKT Signaling	4.28	0.168	-1.147	AKT3	AKT serine/threonine kinase 3	Cytoplasm	kinase	6.87797e-06	7.27745e-07	down	1.6577	-1.6577	-0.72918
PI3K/AKT Signaling	4.28	0.168	-1.147	PTGS2	prostaglandin-endoperoxide synthase 2	Cytoplasm	enzyme	7.99585e-06	8.7125e-07	down	1.80716	-1.80716	-0.853727
PI3K/AKT Signaling	4.28	0.168	-1.147	GSK3B	glycogen synthase kinase 3 beta	Nucleus	kinase	2.55367e-07	1.38835e-08	up	1.64288	1.64288	0.71623
PI3K/AKT Signaling	4.28	0.168	-1.147	PPP2R1B	protein phosphatase 2 scaffold subunit Abeta	Plasma Membrane	phosphatase	1.07505e-10	5.86427e-13	down	3.55737	-3.55737	-1.83081
Cell Cycle: G1/S Checkpoint Regulation	4.16	0.212	1.387	HDAC9	histone deacetylase 9	Nucleus	transcription regulator	5.91691e-05	9.14022e-06	up	1.76391	1.76391	0.818777
Cell Cycle: G1/S Checkpoint Regulation	4.16	0.212	1.387	CCNE2	cyclin E2	Nucleus	other	2.45101e-09	4.01569e-11	down	1.80926	-1.80926	-0.855403
Cell Cycle: G1/S Checkpoint Regulation	4.16	0.212	1.387	HDAC4	histone deacetylase 4	Nucleus	transcription regulator	3.86368e-06	3.6767e-07	down	1.71516	-1.71516	-0.778347
Cell Cycle: G1/S Checkpoint Regulation	4.16	0.212	1.387	HDAC8	histone deacetylase 8	Nucleus	transcription regulator	7.9917e-07	5.57286e-08	down	1.8522	-1.8522	-0.889243
Cell Cycle: G1/S Checkpoint Regulation	4.16	0.212	1.387	PAK1IP1	PAK1 interacting protein 1	Nucleus	other	3.51409e-09	6.2402e-11	down	1.78701	-1.78701	-0.83755
Cell Cycle: G1/S Checkpoint Regulation	4.16	0.212	1.387	CDK6	cyclin dependent kinase 6	Nucleus	kinase	1.75382e-10	1.12439e-12	down	1.96768	-1.96768	-0.976497
Cell Cycle: G1/S Checkpoint Regulation	4.16	0.212	1.387	CCND1	cyclin D1	Nucleus	transcription regulator	6.00024e-10	5.95338e-12	down	2.30478	-2.30478	-1.20463
Cell Cycle: G1/S Checkpoint Regulation	4.16	0.212	1.387	SKP2	S-phase kinase associated protein 2	Nucleus	enzyme	5.42465e-07	3.47364e-08	down	1.88081	-1.88081	-0.911357
Cell Cycle: G1/S Checkpoint Regulation	4.16	0.212	1.387	NRG1	neuregulin 1	Plasma Membrane	growth factor	3.52503e-10	2.84582e-12	down	1.97673	-1.97673	-0.983117
Cell Cycle: G1/S Checkpoint Regulation	4.16	0.212	1.387	CCND2	cyclin D2	Nucleus	other	1.86059e-07	9.41018e-09	down	2.07703	-2.07703	-1.05452
Cell Cycle: G1/S Checkpoint Regulation	4.16	0.212	1.387	FOXO1	forkhead box O1	Nucleus	transcription regulator	1.76954e-08	4.93401e-10	down	1.83353	-1.83353	-0.87462
Cell Cycle: G1/S Checkpoint Regulation	4.16	0.212	1.387	HDAC11	histone deacetylase 11	Nucleus	transcription regulator	2.48377e-07	1.3396e-08	up	1.67911	1.67911	0.7477
Cell Cycle: G1/S Checkpoint Regulation	4.16	0.212	1.387	GSK3B	glycogen synthase kinase 3 beta	Nucleus	kinase	2.55367e-07	1.38835e-08	up	1.64288	1.64288	0.71623
Cell Cycle: G1/S Checkpoint Regulation	4.16	0.212	1.387	CDC25A	cell division cycle 25A	Nucleus	phosphatase	2.09251e-08	6.0688e-10	down	1.72289	-1.72289	-0.784827
HER-2 Signaling in Breast Cancer	3.82	0.182	NaN	CCNE2	cyclin E2	Nucleus	other	2.45101e-09	4.01569e-11	down	1.80926	-1.80926	-0.855403
HER-2 Signaling in Breast Cancer	3.82	0.182	NaN	PIK3C2A	phosphatidylinositol-4-phosphate 3-kinase catalytic subunit type 2 alpha	Cytoplasm	kinase	2.82584e-06	2.52843e-07	down	1.59286	-1.59286	-0.671617
HER-2 Signaling in Breast Cancer	3.82	0.182	NaN	BAD	BCL2 associated agonist of cell death	Cytoplasm	other	1.34915e-08	3.45293e-10	up	1.5081	1.5081	0.59273
HER-2 Signaling in Breast Cancer	3.82	0.182	NaN	FGFR1	fibroblast growth factor receptor 1	Plasma Membrane	kinase	0.000247191	4.8071e-05	up	1.50868	1.50868	0.59329
HER-2 Signaling in Breast Cancer	3.82	0.182	NaN	CDK6	cyclin dependent kinase 6	Nucleus	kinase	1.75382e-10	1.12439e-12	down	1.96768	-1.96768	-0.976497
HER-2 Signaling in Breast Cancer	3.82	0.182	NaN	ERBB3	erb-b2 receptor tyrosine kinase 3	Plasma Membrane	kinase	3.01109e-07	1.69449e-08	up	1.67148	1.67148	0.741127
HER-2 Signaling in Breast Cancer	3.82	0.182	NaN	CCND1	cyclin D1	Nucleus	transcription regulator	6.00024e-10	5.95338e-12	down	2.30478	-2.30478	-1.20463
HER-2 Signaling in Breast Cancer	3.82	0.182	NaN	ITGB3	integrin subunit beta 3	Plasma Membrane	transmembrane receptor	2.10739e-06	1.77301e-07	down	1.98681	-1.98681	-0.990453
HER-2 Signaling in Breast Cancer	3.82	0.182	NaN	PIK3R3	phosphoinositide-3-kinase regulatory subunit 3	Cytoplasm	kinase	8.33611e-08	3.4717e-09	down	1.6323	-1.6323	-0.706907
HER-2 Signaling in Breast Cancer	3.82	0.182	NaN	NRG1	neuregulin 1	Plasma Membrane	growth factor	3.52503e-10	2.84582e-12	down	1.97673	-1.97673	-0.983117
HER-2 Signaling in Breast Cancer	3.82	0.182	NaN	FOXO1	forkhead box O1	Nucleus	transcription regulator	1.76954e-08	4.93401e-10	down	1.83353	-1.83353	-0.87462
HER-2 Signaling in Breast Cancer	3.82	0.182	NaN	CDC42	cell division cycle 42	Cytoplasm	enzyme	7.68247e-08	3.11153e-09	up	1.53845	1.53845	0.621477
HER-2 Signaling in Breast Cancer	3.82	0.182	NaN	PRKCE	protein kinase C epsilon	Cytoplasm	kinase	5.22833e-10	4.84166e-12	down	2.01678	-2.01678	-1.01205
HER-2 Signaling in Breast Cancer	3.82	0.182	NaN	AKT3	AKT serine/threonine kinase 3	Cytoplasm	kinase	6.87797e-06	7.27745e-07	down	1.6577	-1.6577	-0.72918
HER-2 Signaling in Breast Cancer	3.82	0.182	NaN	GSK3B	glycogen synthase kinase 3 beta	Nucleus	kinase	2.55367e-07	1.38835e-08	up	1.64288	1.64288	0.71623
HER-2 Signaling in Breast Cancer	3.82	0.182	NaN	EGFR	epidermal growth factor receptor	Plasma Membrane	kinase	7.80544e-08	3.18516e-09	down	1.65723	-1.65723	-0.728773
Molecular Mechanisms of Cancer	3.79	0.114	NaN	PRKACB	protein kinase cAMP-activated catalytic subunit beta	Cytoplasm	kinase	3.85749e-08	1.31897e-09	down	2.07728	-2.07728	-1.0547
Molecular Mechanisms of Cancer	3.79	0.114	NaN	JAK1	Janus kinase 1	Cytoplasm	kinase	1.06066e-06	7.81996e-08	down	1.54581	-1.54581	-0.62836
Molecular Mechanisms of Cancer	3.79	0.114	NaN	BAD	BCL2 associated agonist of cell death	Cytoplasm	other	1.34915e-08	3.45293e-10	up	1.5081	1.5081	0.59273
Molecular Mechanisms of Cancer	3.79	0.114	NaN	WNT3	Wnt family member 3	Extracellular Space	other	1.4617e-05	1.78124e-06	down	1.50754	-1.50754	-0.5922
Molecular Mechanisms of Cancer	3.79	0.114	NaN	CDK16	cyclin dependent kinase 16	Cytoplasm	kinase	1.06082e-08	2.53688e-10	down	1.76266	-1.76266	-0.817757
Molecular Mechanisms of Cancer	3.79	0.114	NaN	GNA11	G protein subunit alpha 11	Plasma Membrane	enzyme	4.84133e-08	1.76622e-09	up	1.59017	1.59017	0.669177
Molecular Mechanisms of Cancer	3.79	0.114	NaN	CRK	CRK proto-oncogene, adaptor protein	Cytoplasm	other	2.44547e-11	7.27911e-14	down	1.87964	-1.87964	-0.91046
Molecular Mechanisms of Cancer	3.79	0.114	NaN	SMAD5	SMAD family member 5	Nucleus	transcription regulator	2.78306e-08	8.78668e-10	down	1.68691	-1.68691	-0.754387
Molecular Mechanisms of Cancer	3.79	0.114	NaN	CCND1	cyclin D1	Nucleus	transcription regulator	6.00024e-10	5.95338e-12	down	2.30478	-2.30478	-1.20463
Molecular Mechanisms of Cancer	3.79	0.114	NaN	LAMTOR3	late endosomal/lysosomal adaptor, MAPK and MTOR activator 3	Cytoplasm	other	1.02904e-07	4.51334e-09	down	1.97119	-1.97119	-0.97907
Molecular Mechanisms of Cancer	3.79	0.114	NaN	BBC3	BCL2 binding component 3	Cytoplasm	other	5.44696e-10	5.17992e-12	down	2.09619	-2.09619	-1.06777
Molecular Mechanisms of Cancer	3.79	0.114	NaN	HHAT	hedgehog acyltransferase	Cytoplasm	enzyme	1.15337e-06	8.66485e-08	down	1.93723	-1.93723	-0.953993
Molecular Mechanisms of Cancer	3.79	0.114	NaN	MAPK3	mitogen-activated protein kinase 3	Cytoplasm	kinase	4.35448e-07	2.63697e-08	down	1.70674	-1.70674	-0.77124
Molecular Mechanisms of Cancer	3.79	0.114	NaN	PRKCE	protein kinase C epsilon	Cytoplasm	kinase	5.22833e-10	4.84166e-12	down	2.01678	-2.01678	-1.01205
Molecular Mechanisms of Cancer	3.79	0.114	NaN	AKT3	AKT serine/threonine kinase 3	Cytoplasm	kinase	6.87797e-06	7.27745e-07	down	1.6577	-1.6577	-0.72918
Molecular Mechanisms of Cancer	3.79	0.114	NaN	GSK3B	glycogen synthase kinase 3 beta	Nucleus	kinase	2.55367e-07	1.38835e-08	up	1.64288	1.64288	0.71623
Molecular Mechanisms of Cancer	3.79	0.114	NaN	HIPK2	homeodomain interacting protein kinase 2	Nucleus	kinase	1.7459e-07	8.73239e-09	up	1.74002	1.74002	0.799103
Molecular Mechanisms of Cancer	3.79	0.114	NaN	BRCA1	BRCA1, DNA repair associated	Nucleus	transcription regulator	2.40849e-06	2.07963e-07	down	1.52917	-1.52917	-0.612753
Molecular Mechanisms of Cancer	3.79	0.114	NaN	CDC25A	cell division cycle 25A	Nucleus	phosphatase	2.09251e-08	6.0688e-10	down	1.72289	-1.72289	-0.784827
Molecular Mechanisms of Cancer	3.79	0.114	NaN	SMAD2	SMAD family member 2	Nucleus	transcription regulator	1.4095e-06	1.10481e-07	up	1.52286	1.52286	0.606787
Molecular Mechanisms of Cancer	3.79	0.114	NaN	PMAIP1	phorbol-12-myristate-13-acetate-induced protein 1	Cytoplasm	other	7.34749e-12	1.17763e-14	down	2.09497	-2.09497	-1.06693
Molecular Mechanisms of Cancer	3.79	0.114	NaN	CCNE2	cyclin E2	Nucleus	other	2.45101e-09	4.01569e-11	down	1.80926	-1.80926	-0.855403
Molecular Mechanisms of Cancer	3.79	0.114	NaN	CDC25C	cell division cycle 25C	Nucleus	phosphatase	1.99828e-07	1.02438e-08	down	1.53353	-1.53353	-0.616857
Molecular Mechanisms of Cancer	3.79	0.114	NaN	PIK3C2A	phosphatidylinositol-4-phosphate 3-kinase catalytic subunit type 2 alpha	Cytoplasm	kinase	2.82584e-06	2.52843e-07	down	1.59286	-1.59286	-0.671617
Molecular Mechanisms of Cancer	3.79	0.114	NaN	FGFR1	fibroblast growth factor receptor 1	Plasma Membrane	kinase	0.000247191	4.8071e-05	up	1.50868	1.50868	0.59329
Molecular Mechanisms of Cancer	3.79	0.114	NaN	ITGA2	integrin subunit alpha 2	Plasma Membrane	transmembrane receptor	1.38403e-07	6.53158e-09	up	1.86016	1.86016	0.895423
Molecular Mechanisms of Cancer	3.79	0.114	NaN	RALB	RAS like proto-oncogene B	Cytoplasm	enzyme	3.99931e-10	3.36778e-12	up	1.79067	1.79067	0.840503
Molecular Mechanisms of Cancer	3.79	0.114	NaN	SMAD6	SMAD family member 6	Nucleus	transcription regulator	0.000169527	3.1083e-05	down	1.53174	-1.53174	-0.615173
Molecular Mechanisms of Cancer	3.79	0.114	NaN	CDK6	cyclin dependent kinase 6	Nucleus	kinase	1.75382e-10	1.12439e-12	down	1.96768	-1.96768	-0.976497
Molecular Mechanisms of Cancer	3.79	0.114	NaN	PRKAR2A	protein kinase cAMP-dependent type II regulatory subunit alpha	Cytoplasm	kinase	1.6572e-09	2.35652e-11	up	1.61798	1.61798	0.694197
Molecular Mechanisms of Cancer	3.79	0.114	NaN	ITGA5	integrin subunit alpha 5	Plasma Membrane	transmembrane receptor	2.35836e-10	1.66796e-12	down	2.56143	-2.56143	-1.35695
Molecular Mechanisms of Cancer	3.79	0.114	NaN	RALBP1	ralA binding protein 1	Cytoplasm	enzyme	5.13958e-09	1.00681e-10	down	1.55739	-1.55739	-0.639133
Molecular Mechanisms of Cancer	3.79	0.114	NaN	RAP1A	RAP1A, member of RAS oncogene family	Cytoplasm	enzyme	1.35837e-14	3.45579e-19	down	2.46964	-2.46964	-1.3043
Molecular Mechanisms of Cancer	3.79	0.114	NaN	PIK3R3	phosphoinositide-3-kinase regulatory subunit 3	Cytoplasm	kinase	8.33611e-08	3.4717e-09	down	1.6323	-1.6323	-0.706907
Molecular Mechanisms of Cancer	3.79	0.114	NaN	GNAI3	G protein subunit alpha i3	Cytoplasm	enzyme	1.09582e-07	4.92056e-09	down	1.51852	-1.51852	-0.602667
Molecular Mechanisms of Cancer	3.79	0.114	NaN	CCND2	cyclin D2	Nucleus	other	1.86059e-07	9.41018e-09	down	2.07703	-2.07703	-1.05452
Molecular Mechanisms of Cancer	3.79	0.114	NaN	PRKAR2B	protein kinase cAMP-dependent type II regulatory subunit beta	Cytoplasm	kinase	1.11727e-05	1.29359e-06	up	1.57564	1.57564	0.655937
Molecular Mechanisms of Cancer	3.79	0.114	NaN	RABIF	RAB interacting factor	Other	transporter	5.99549e-08	2.30473e-09	down	1.68995	-1.68995	-0.756977
Molecular Mechanisms of Cancer	3.79	0.114	NaN	FOXO1	forkhead box O1	Nucleus	transcription regulator	1.76954e-08	4.93401e-10	down	1.83353	-1.83353	-0.87462
Molecular Mechanisms of Cancer	3.79	0.114	NaN	CDC42	cell division cycle 42	Cytoplasm	enzyme	7.68247e-08	3.11153e-09	up	1.53845	1.53845	0.621477
Molecular Mechanisms of Cancer	3.79	0.114	NaN	APH1B	aph-1 homolog B, gamma-secretase subunit	Other	peptidase	2.06887e-08	5.98971e-10	down	1.88418	-1.88418	-0.91394
Molecular Mechanisms of Cancer	3.79	0.114	NaN	ARHGEF18	Rho/Rac guanine nucleotide exchange factor 18	Cytoplasm	other	4.17575e-08	1.46391e-09	up	1.55466	1.55466	0.6366
Molecular Mechanisms of Cancer	3.79	0.114	NaN	CDK19	cyclin dependent kinase 19	Nucleus	kinase	1.13925e-08	2.78681e-10	down	1.79998	-1.79998	-0.847983
Molecular Mechanisms of Cancer	3.79	0.114	NaN	FNBP1	formin binding protein 1	Nucleus	enzyme	1.3572e-06	1.05504e-07	up	1.82302	1.82302	0.866333
Molecular Mechanisms of Cancer	3.79	0.114	NaN	WNT5A	Wnt family member 5A	Extracellular Space	cytokine	1.19558e-06	9.04282e-08	down	1.68529	-1.68529	-0.752993
ERK/MAPK Signaling	3.62	0.135	-2.041	PRKACB	protein kinase cAMP-activated catalytic subunit beta	Cytoplasm	kinase	3.85749e-08	1.31897e-09	down	2.07728	-2.07728	-1.0547
ERK/MAPK Signaling	3.62	0.135	-2.041	BAD	BCL2 associated agonist of cell death	Cytoplasm	other	1.34915e-08	3.45293e-10	up	1.5081	1.5081	0.59273
ERK/MAPK Signaling	3.62	0.135	-2.041	CRK	CRK proto-oncogene, adaptor protein	Cytoplasm	other	2.44547e-11	7.27911e-14	down	1.87964	-1.87964	-0.91046
ERK/MAPK Signaling	3.62	0.135	-2.041	EIF4E	eukaryotic translation initiation factor 4E	Cytoplasm	translation regulator	1.1558e-09	1.44963e-11	down	2.9448	-2.9448	-1.55817
ERK/MAPK Signaling	3.62	0.135	-2.041	LAMTOR3	late endosomal/lysosomal adaptor, MAPK and MTOR activator 3	Cytoplasm	other	1.02904e-07	4.51334e-09	down	1.97119	-1.97119	-0.97907
ERK/MAPK Signaling	3.62	0.135	-2.041	ELF3	E74 like ETS transcription factor 3	Nucleus	transcription regulator	7.09466e-09	1.54559e-10	down	1.65089	-1.65089	-0.723243
ERK/MAPK Signaling	3.62	0.135	-2.041	PPP1R7	protein phosphatase 1 regulatory subunit 7	Nucleus	phosphatase	1.91811e-08	5.46051e-10	up	1.51893	1.51893	0.603057
ERK/MAPK Signaling	3.62	0.135	-2.041	MAPK3	mitogen-activated protein kinase 3	Cytoplasm	kinase	4.35448e-07	2.63697e-08	down	1.70674	-1.70674	-0.77124
ERK/MAPK Signaling	3.62	0.135	-2.041	PRKCE	protein kinase C epsilon	Cytoplasm	kinase	5.22833e-10	4.84166e-12	down	2.01678	-2.01678	-1.01205
ERK/MAPK Signaling	3.62	0.135	-2.041	PLA2G12A	phospholipase A2 group XIIA	Other	enzyme	9.14457e-06	1.02317e-06	up	1.60747	1.60747	0.68479
ERK/MAPK Signaling	3.62	0.135	-2.041	ETS1	ETS proto-oncogene 1, transcription factor	Nucleus	transcription regulator	7.6565e-11	3.63023e-13	down	1.5292	-1.5292	-0.612773
ERK/MAPK Signaling	3.62	0.135	-2.041	YWHAG	tyrosine 3-monooxygenase/tryptophan 5-monooxygenase activation protein gamma	Cytoplasm	other	3.50366e-08	1.1649e-09	down	1.75089	-1.75089	-0.808087
ERK/MAPK Signaling	3.62	0.135	-2.041	PIK3C2A	phosphatidylinositol-4-phosphate 3-kinase catalytic subunit type 2 alpha	Cytoplasm	kinase	2.82584e-06	2.52843e-07	down	1.59286	-1.59286	-0.671617
ERK/MAPK Signaling	3.62	0.135	-2.041	FGFR1	fibroblast growth factor receptor 1	Plasma Membrane	kinase	0.000247191	4.8071e-05	up	1.50868	1.50868	0.59329
ERK/MAPK Signaling	3.62	0.135	-2.041	ITGA2	integrin subunit alpha 2	Plasma Membrane	transmembrane receptor	1.38403e-07	6.53158e-09	up	1.86016	1.86016	0.895423
ERK/MAPK Signaling	3.62	0.135	-2.041	YWHAZ	tyrosine 3-monooxygenase/tryptophan 5-monooxygenase activation protein zeta	Cytoplasm	enzyme	2.82601e-10	2.16809e-12	down	1.5975	-1.5975	-0.67582
ERK/MAPK Signaling	3.62	0.135	-2.041	PRKAR2A	protein kinase cAMP-dependent type II regulatory subunit alpha	Cytoplasm	kinase	1.6572e-09	2.35652e-11	up	1.61798	1.61798	0.694197
ERK/MAPK Signaling	3.62	0.135	-2.041	ITGA5	integrin subunit alpha 5	Plasma Membrane	transmembrane receptor	2.35836e-10	1.66796e-12	down	2.56143	-2.56143	-1.35695
ERK/MAPK Signaling	3.62	0.135	-2.041	CREB5	cAMP responsive element binding protein 5	Nucleus	transcription regulator	7.24769e-06	7.75162e-07	down	1.82782	-1.82782	-0.870123
ERK/MAPK Signaling	3.62	0.135	-2.041	RAP1A	RAP1A, member of RAS oncogene family	Cytoplasm	enzyme	1.35837e-14	3.45579e-19	down	2.46964	-2.46964	-1.3043
ERK/MAPK Signaling	3.62	0.135	-2.041	PPP2R5A	protein phosphatase 2 regulatory subunit B'alpha	Cytoplasm	phosphatase	4.36257e-10	3.81011e-12	up	1.99923	1.99923	0.999443
ERK/MAPK Signaling	3.62	0.135	-2.041	PIK3R3	phosphoinositide-3-kinase regulatory subunit 3	Cytoplasm	kinase	8.33611e-08	3.4717e-09	down	1.6323	-1.6323	-0.706907
ERK/MAPK Signaling	3.62	0.135	-2.041	PLA2G4A	phospholipase A2 group IVA	Cytoplasm	enzyme	3.53697e-06	3.30328e-07	up	1.62024	1.62024	0.69621
ERK/MAPK Signaling	3.62	0.135	-2.041	PRKAR2B	protein kinase cAMP-dependent type II regulatory subunit beta	Cytoplasm	kinase	1.11727e-05	1.29359e-06	up	1.57564	1.57564	0.655937
ERK/MAPK Signaling	3.62	0.135	-2.041	H3F3A/H3F3B	H3 histone family member 3A	Nucleus	other	9.30595e-12	1.75195e-14	down	2.3275	-2.3275	-1.21878
ERK/MAPK Signaling	3.62	0.135	-2.041	RPS6KA1	ribosomal protein S6 kinase A1	Cytoplasm	kinase	3.83157e-08	1.30677e-09	down	1.61813	-1.61813	-0.694327
ERK/MAPK Signaling	3.62	0.135	-2.041	PPP2R1B	protein phosphatase 2 scaffold subunit Abeta	Plasma Membrane	phosphatase	1.07505e-10	5.86427e-13	down	3.55737	-3.55737	-1.83081
p53 Signaling	3.56	0.162	-0.535	HDAC9	histone deacetylase 9	Nucleus	transcription regulator	5.91691e-05	9.14022e-06	up	1.76391	1.76391	0.818777
p53 Signaling	3.56	0.162	-0.535	PMAIP1	phorbol-12-myristate-13-acetate-induced protein 1	Cytoplasm	other	7.34749e-12	1.17763e-14	down	2.09497	-2.09497	-1.06693
p53 Signaling	3.56	0.162	-0.535	PIK3C2A	phosphatidylinositol-4-phosphate 3-kinase catalytic subunit type 2 alpha	Cytoplasm	kinase	2.82584e-06	2.52843e-07	down	1.59286	-1.59286	-0.671617
p53 Signaling	3.56	0.162	-0.535	JMY	junction mediating and regulatory protein, p53 cofactor	Nucleus	transcription regulator	5.97359e-07	3.88594e-08	down	1.59242	-1.59242	-0.671223
p53 Signaling	3.56	0.162	-0.535	MED1	mediator complex subunit 1	Nucleus	transcription regulator	1.04596e-07	4.63012e-09	down	1.53385	-1.53385	-0.61716
p53 Signaling	3.56	0.162	-0.535	FGFR1	fibroblast growth factor receptor 1	Plasma Membrane	kinase	0.000247191	4.8071e-05	up	1.50868	1.50868	0.59329
p53 Signaling	3.56	0.162	-0.535	TIGAR	TP53 induced glycolysis regulatory phosphatase	Cytoplasm	enzyme	1.28596e-06	9.87691e-08	down	1.56302	-1.56302	-0.644333
p53 Signaling	3.56	0.162	-0.535	CCND1	cyclin D1	Nucleus	transcription regulator	6.00024e-10	5.95338e-12	down	2.30478	-2.30478	-1.20463
p53 Signaling	3.56	0.162	-0.535	BIRC5	baculoviral IAP repeat containing 5	Cytoplasm	other	6.90676e-10	7.25696e-12	up	1.63301	1.63301	0.70753
p53 Signaling	3.56	0.162	-0.535	PTEN	phosphatase and tensin homolog	Cytoplasm	phosphatase	4.30522e-08	1.52354e-09	down	2.05755	-2.05755	-1.04093
p53 Signaling	3.56	0.162	-0.535	PIK3R3	phosphoinositide-3-kinase regulatory subunit 3	Cytoplasm	kinase	8.33611e-08	3.4717e-09	down	1.6323	-1.6323	-0.706907
p53 Signaling	3.56	0.162	-0.535	CCND2	cyclin D2	Nucleus	other	1.86059e-07	9.41018e-09	down	2.07703	-2.07703	-1.05452
p53 Signaling	3.56	0.162	-0.535	BBC3	BCL2 binding component 3	Cytoplasm	other	5.44696e-10	5.17992e-12	down	2.09619	-2.09619	-1.06777
p53 Signaling	3.56	0.162	-0.535	THBS1	thrombospondin 1	Extracellular Space	other	1.30603e-08	3.30421e-10	down	2.022	-2.022	-1.01578
p53 Signaling	3.56	0.162	-0.535	AKT3	AKT serine/threonine kinase 3	Cytoplasm	kinase	6.87797e-06	7.27745e-07	down	1.6577	-1.6577	-0.72918
p53 Signaling	3.56	0.162	-0.535	GSK3B	glycogen synthase kinase 3 beta	Nucleus	kinase	2.55367e-07	1.38835e-08	up	1.64288	1.64288	0.71623
p53 Signaling	3.56	0.162	-0.535	HIPK2	homeodomain interacting protein kinase 2	Nucleus	kinase	1.7459e-07	8.73239e-09	up	1.74002	1.74002	0.799103
p53 Signaling	3.56	0.162	-0.535	BRCA1	BRCA1, DNA repair associated	Nucleus	transcription regulator	2.40849e-06	2.07963e-07	down	1.52917	-1.52917	-0.612753
Huntington's Disease Signaling	3.4	0.124	-0.277	GNA11	G protein subunit alpha 11	Plasma Membrane	enzyme	4.84133e-08	1.76622e-09	up	1.59017	1.59017	0.669177
Huntington's Disease Signaling	3.4	0.124	-0.277	GNB5	G protein subunit beta 5	Plasma Membrane	enzyme	3.71155e-06	3.49654e-07	down	1.5287	-1.5287	-0.612307
Huntington's Disease Signaling	3.4	0.124	-0.277	PDPK1	3-phosphoinositide dependent protein kinase 1	Cytoplasm	kinase	1.1086e-07	4.99204e-09	up	1.65403	1.65403	0.725987
Huntington's Disease Signaling	3.4	0.124	-0.277	NGF	nerve growth factor	Extracellular Space	growth factor	3.4574e-09	6.13073e-11	down	2.06288	-2.06288	-1.04466
Huntington's Disease Signaling	3.4	0.124	-0.277	VTI1B	vesicle transport through interaction with t-SNAREs 1B	Plasma Membrane	transporter	1.57007e-07	7.69315e-09	up	1.77418	1.77418	0.827153
Huntington's Disease Signaling	3.4	0.124	-0.277	TGM2	transglutaminase 2	Cytoplasm	enzyme	5.62508e-10	5.40942e-12	up	1.61112	1.61112	0.688067
Huntington's Disease Signaling	3.4	0.124	-0.277	GNB4	G protein subunit beta 4	Plasma Membrane	enzyme	2.91359e-06	2.6225e-07	down	1.9306	-1.9306	-0.949047
Huntington's Disease Signaling	3.4	0.124	-0.277	HSPA4	heat shock protein family A (Hsp70) member 4	Cytoplasm	other	9.11694e-08	3.87343e-09	down	1.56611	-1.56611	-0.64719
Huntington's Disease Signaling	3.4	0.124	-0.277	MTOR	mechanistic target of rapamycin	Nucleus	kinase	2.15174e-08	6.28984e-10	up	1.65752	1.65752	0.729023
Huntington's Disease Signaling	3.4	0.124	-0.277	HDAC11	histone deacetylase 11	Nucleus	transcription regulator	2.48377e-07	1.3396e-08	up	1.67911	1.67911	0.7477
Huntington's Disease Signaling	3.4	0.124	-0.277	MAPK3	mitogen-activated protein kinase 3	Cytoplasm	kinase	4.35448e-07	2.63697e-08	down	1.70674	-1.70674	-0.77124
Huntington's Disease Signaling	3.4	0.124	-0.277	AKT3	AKT serine/threonine kinase 3	Cytoplasm	kinase	6.87797e-06	7.27745e-07	down	1.6577	-1.6577	-0.72918
Huntington's Disease Signaling	3.4	0.124	-0.277	PRKCE	protein kinase C epsilon	Cytoplasm	kinase	5.22833e-10	4.84166e-12	down	2.01678	-2.01678	-1.01205
Huntington's Disease Signaling	3.4	0.124	-0.277	BET1L	Bet1 golgi vesicular membrane trafficking protein like	Cytoplasm	transporter	1.18892e-09	1.5063e-11	up	1.8773	1.8773	0.908657
Huntington's Disease Signaling	3.4	0.124	-0.277	NAPB	NSF attachment protein beta	Cytoplasm	transporter	0.00034691	7.05963e-05	down	1.50327	-1.50327	-0.588107
Huntington's Disease Signaling	3.4	0.124	-0.277	POLR2L	RNA polymerase II subunit L	Nucleus	enzyme	3.57128e-10	2.89831e-12	up	1.50329	1.50329	0.58812
Huntington's Disease Signaling	3.4	0.124	-0.277	EGFR	epidermal growth factor receptor	Plasma Membrane	kinase	7.80544e-08	3.18516e-09	down	1.65723	-1.65723	-0.728773
Huntington's Disease Signaling	3.4	0.124	-0.277	GNG4	G protein subunit gamma 4	Plasma Membrane	enzyme	2.89549e-05	3.96899e-06	down	1.50766	-1.50766	-0.592307
Huntington's Disease Signaling	3.4	0.124	-0.277	POLR2I	RNA polymerase II subunit I	Nucleus	transcription regulator	5.00112e-11	1.85759e-13	up	1.70927	1.70927	0.77338
Huntington's Disease Signaling	3.4	0.124	-0.277	HDAC9	histone deacetylase 9	Nucleus	transcription regulator	5.91691e-05	9.14022e-06	up	1.76391	1.76391	0.818777
Huntington's Disease Signaling	3.4	0.124	-0.277	HDAC4	histone deacetylase 4	Nucleus	transcription regulator	3.86368e-06	3.6767e-07	down	1.71516	-1.71516	-0.778347
Huntington's Disease Signaling	3.4	0.124	-0.277	HDAC8	histone deacetylase 8	Nucleus	transcription regulator	7.9917e-07	5.57286e-08	down	1.8522	-1.8522	-0.889243
Huntington's Disease Signaling	3.4	0.124	-0.277	PIK3C2A	phosphatidylinositol-4-phosphate 3-kinase catalytic subunit type 2 alpha	Cytoplasm	kinase	2.82584e-06	2.52843e-07	down	1.59286	-1.59286	-0.671617
Huntington's Disease Signaling	3.4	0.124	-0.277	PSMF1	proteasome inhibitor subunit 1	Cytoplasm	other	3.62793e-05	5.15111e-06	down	1.53919	-1.53919	-0.622167
Huntington's Disease Signaling	3.4	0.124	-0.277	GLS	glutaminase	Cytoplasm	enzyme	6.21473e-07	4.07127e-08	up	2.46799	2.46799	1.30334
Huntington's Disease Signaling	3.4	0.124	-0.277	FGFR1	fibroblast growth factor receptor 1	Plasma Membrane	kinase	0.000247191	4.8071e-05	up	1.50868	1.50868	0.59329
Huntington's Disease Signaling	3.4	0.124	-0.277	RCOR1	REST corepressor 1	Nucleus	transcription regulator	2.52148e-08	7.73113e-10	down	1.59079	-1.59079	-0.669743
Huntington's Disease Signaling	3.4	0.124	-0.277	CREB5	cAMP responsive element binding protein 5	Nucleus	transcription regulator	7.24769e-06	7.75162e-07	down	1.82782	-1.82782	-0.870123
Huntington's Disease Signaling	3.4	0.124	-0.277	DNM1	dynamin 1	Cytoplasm	enzyme	1.12992e-06	8.45705e-08	up	1.6039	1.6039	0.681587
Huntington's Disease Signaling	3.4	0.124	-0.277	PIK3R3	phosphoinositide-3-kinase regulatory subunit 3	Cytoplasm	kinase	8.33611e-08	3.4717e-09	down	1.6323	-1.6323	-0.706907
Huntington's Disease Signaling	3.4	0.124	-0.277	PSME4	proteasome activator subunit 4	Cytoplasm	other	0.000205887	3.88915e-05	down	1.65356	-1.65356	-0.725573
Prostate Cancer Signaling	3.32	0.165	NaN	CCNE2	cyclin E2	Nucleus	other	2.45101e-09	4.01569e-11	down	1.80926	-1.80926	-0.855403
Prostate Cancer Signaling	3.32	0.165	NaN	PIK3C2A	phosphatidylinositol-4-phosphate 3-kinase catalytic subunit type 2 alpha	Cytoplasm	kinase	2.82584e-06	2.52843e-07	down	1.59286	-1.59286	-0.671617
Prostate Cancer Signaling	3.32	0.165	NaN	BAD	BCL2 associated agonist of cell death	Cytoplasm	other	1.34915e-08	3.45293e-10	up	1.5081	1.5081	0.59273
Prostate Cancer Signaling	3.32	0.165	NaN	SRD5A1	steroid 5 alpha-reductase 1	Cytoplasm	enzyme	5.79037e-09	1.17702e-10	up	1.78715	1.78715	0.837663
Prostate Cancer Signaling	3.32	0.165	NaN	FGFR1	fibroblast growth factor receptor 1	Plasma Membrane	kinase	0.000247191	4.8071e-05	up	1.50868	1.50868	0.59329
Prostate Cancer Signaling	3.32	0.165	NaN	PDPK1	3-phosphoinositide dependent protein kinase 1	Cytoplasm	kinase	1.1086e-07	4.99204e-09	up	1.65403	1.65403	0.725987
Prostate Cancer Signaling	3.32	0.165	NaN	CREB5	cAMP responsive element binding protein 5	Nucleus	transcription regulator	7.24769e-06	7.75162e-07	down	1.82782	-1.82782	-0.870123
Prostate Cancer Signaling	3.32	0.165	NaN	CCND1	cyclin D1	Nucleus	transcription regulator	6.00024e-10	5.95338e-12	down	2.30478	-2.30478	-1.20463
Prostate Cancer Signaling	3.32	0.165	NaN	PTEN	phosphatase and tensin homolog	Cytoplasm	phosphatase	4.30522e-08	1.52354e-09	down	2.05755	-2.05755	-1.04093
Prostate Cancer Signaling	3.32	0.165	NaN	PIK3R3	phosphoinositide-3-kinase regulatory subunit 3	Cytoplasm	kinase	8.33611e-08	3.4717e-09	down	1.6323	-1.6323	-0.706907
Prostate Cancer Signaling	3.32	0.165	NaN	MTOR	mechanistic target of rapamycin	Nucleus	kinase	2.15174e-08	6.28984e-10	up	1.65752	1.65752	0.729023
Prostate Cancer Signaling	3.32	0.165	NaN	FOXO1	forkhead box O1	Nucleus	transcription regulator	1.76954e-08	4.93401e-10	down	1.83353	-1.83353	-0.87462
Prostate Cancer Signaling	3.32	0.165	NaN	MAPK3	mitogen-activated protein kinase 3	Cytoplasm	kinase	4.35448e-07	2.63697e-08	down	1.70674	-1.70674	-0.77124
Prostate Cancer Signaling	3.32	0.165	NaN	HSP90AA1	heat shock protein 90 alpha family class A member 1	Cytoplasm	enzyme	7.40107e-10	7.894e-12	up	1.62731	1.62731	0.70249
Prostate Cancer Signaling	3.32	0.165	NaN	AKT3	AKT serine/threonine kinase 3	Cytoplasm	kinase	6.87797e-06	7.27745e-07	down	1.6577	-1.6577	-0.72918
Prostate Cancer Signaling	3.32	0.165	NaN	GSK3B	glycogen synthase kinase 3 beta	Nucleus	kinase	2.55367e-07	1.38835e-08	up	1.64288	1.64288	0.71623
CDP-diacylglycerol Biosynthesis I	3.21	0.292	NaN	GPAM	glycerol-3-phosphate acyltransferase, mitochondrial	Cytoplasm	enzyme	7.09847e-09	1.54947e-10	up	1.80746	1.80746	0.853963
CDP-diacylglycerol Biosynthesis I	3.21	0.292	NaN	AGPAT5	1-acylglycerol-3-phosphate O-acyltransferase 5	Cytoplasm	enzyme	1.97294e-06	1.64131e-07	down	1.60997	-1.60997	-0.68703
CDP-diacylglycerol Biosynthesis I	3.21	0.292	NaN	ABHD5	abhydrolase domain containing 5	Cytoplasm	enzyme	6.33726e-08	2.46029e-09	down	1.91445	-1.91445	-0.936933
CDP-diacylglycerol Biosynthesis I	3.21	0.292	NaN	LPCAT3	lysophosphatidylcholine acyltransferase 3	Plasma Membrane	enzyme	3.27821e-07	1.87817e-08	up	1.55499	1.55499	0.636903
CDP-diacylglycerol Biosynthesis I	3.21	0.292	NaN	GPAT3	glycerol-3-phosphate acyltransferase 3	Cytoplasm	enzyme	1.01908e-05	1.16201e-06	down	1.72312	-1.72312	-0.785023
CDP-diacylglycerol Biosynthesis I	3.21	0.292	NaN	LPGAT1	lysophosphatidylglycerol acyltransferase 1	Cytoplasm	enzyme	4.66971e-09	8.91007e-11	down	1.71612	-1.71612	-0.779153
CDP-diacylglycerol Biosynthesis I	3.21	0.292	NaN	CDS2	CDP-diacylglycerol synthase 2	Cytoplasm	enzyme	3.27825e-10	2.62294e-12	up	1.95834	1.95834	0.96963
PTEN Signaling	3.19	0.151	1.213	BAD	BCL2 associated agonist of cell death	Cytoplasm	other	1.34915e-08	3.45293e-10	up	1.5081	1.5081	0.59273
PTEN Signaling	3.19	0.151	1.213	FGFR1	fibroblast growth factor receptor 1	Plasma Membrane	kinase	0.000247191	4.8071e-05	up	1.50868	1.50868	0.59329
PTEN Signaling	3.19	0.151	1.213	ITGA2	integrin subunit alpha 2	Plasma Membrane	transmembrane receptor	1.38403e-07	6.53158e-09	up	1.86016	1.86016	0.895423
PTEN Signaling	3.19	0.151	1.213	ITGA5	integrin subunit alpha 5	Plasma Membrane	transmembrane receptor	2.35836e-10	1.66796e-12	down	2.56143	-2.56143	-1.35695
PTEN Signaling	3.19	0.151	1.213	PDPK1	3-phosphoinositide dependent protein kinase 1	Cytoplasm	kinase	1.1086e-07	4.99204e-09	up	1.65403	1.65403	0.725987
PTEN Signaling	3.19	0.151	1.213	CCND1	cyclin D1	Nucleus	transcription regulator	6.00024e-10	5.95338e-12	down	2.30478	-2.30478	-1.20463
PTEN Signaling	3.19	0.151	1.213	IGF2R	insulin like growth factor 2 receptor	Plasma Membrane	transmembrane receptor	1.6572e-09	2.36166e-11	down	1.92668	-1.92668	-0.946113
PTEN Signaling	3.19	0.151	1.213	PTEN	phosphatase and tensin homolog	Cytoplasm	phosphatase	4.30522e-08	1.52354e-09	down	2.05755	-2.05755	-1.04093
PTEN Signaling	3.19	0.151	1.213	PIK3R3	phosphoinositide-3-kinase regulatory subunit 3	Cytoplasm	kinase	8.33611e-08	3.4717e-09	down	1.6323	-1.6323	-0.706907
PTEN Signaling	3.19	0.151	1.213	CSNK2A2	casein kinase 2 alpha 2	Cytoplasm	kinase	6.838e-06	7.22554e-07	up	1.75656	1.75656	0.812757
PTEN Signaling	3.19	0.151	1.213	GHR	growth hormone receptor	Plasma Membrane	transmembrane receptor	8.7072e-06	9.66925e-07	down	1.55949	-1.55949	-0.641077
PTEN Signaling	3.19	0.151	1.213	FOXO1	forkhead box O1	Nucleus	transcription regulator	1.76954e-08	4.93401e-10	down	1.83353	-1.83353	-0.87462
PTEN Signaling	3.19	0.151	1.213	CDC42	cell division cycle 42	Cytoplasm	enzyme	7.68247e-08	3.11153e-09	up	1.53845	1.53845	0.621477
PTEN Signaling	3.19	0.151	1.213	MAPK3	mitogen-activated protein kinase 3	Cytoplasm	kinase	4.35448e-07	2.63697e-08	down	1.70674	-1.70674	-0.77124
PTEN Signaling	3.19	0.151	1.213	FOXO3	forkhead box O3	Nucleus	transcription regulator	6.36945e-09	1.34477e-10	down	1.57783	-1.57783	-0.657943
PTEN Signaling	3.19	0.151	1.213	AKT3	AKT serine/threonine kinase 3	Cytoplasm	kinase	6.87797e-06	7.27745e-07	down	1.6577	-1.6577	-0.72918
PTEN Signaling	3.19	0.151	1.213	GSK3B	glycogen synthase kinase 3 beta	Nucleus	kinase	2.55367e-07	1.38835e-08	up	1.64288	1.64288	0.71623
PTEN Signaling	3.19	0.151	1.213	EGFR	epidermal growth factor receptor	Plasma Membrane	kinase	7.80544e-08	3.18516e-09	down	1.65723	-1.65723	-0.728773
Glucocorticoid Receptor Signaling	3.14	0.112	NaN	PRKACB	protein kinase cAMP-activated catalytic subunit beta	Cytoplasm	kinase	3.85749e-08	1.31897e-09	down	2.07728	-2.07728	-1.0547
Glucocorticoid Receptor Signaling	3.14	0.112	NaN	JAK1	Janus kinase 1	Cytoplasm	kinase	1.06066e-06	7.81996e-08	down	1.54581	-1.54581	-0.62836
Glucocorticoid Receptor Signaling	3.14	0.112	NaN	NFATC3	nuclear factor of activated T-cells 3	Nucleus	transcription regulator	2.44288e-06	2.1143e-07	down	1.71021	-1.71021	-0.77417
Glucocorticoid Receptor Signaling	3.14	0.112	NaN	CCL5	C-C motif chemokine ligand 5	Extracellular Space	cytokine	1.05263e-06	7.75007e-08	down	1.90161	-1.90161	-0.927223
Glucocorticoid Receptor Signaling	3.14	0.112	NaN	NR3C1	nuclear receptor subfamily 3 group C member 1	Nucleus	ligand-dependent nuclear receptor	5.79647e-07	3.75903e-08	down	1.57858	-1.57858	-0.65863
Glucocorticoid Receptor Signaling	3.14	0.112	NaN	TAF13	TATA-box binding protein associated factor 13	Nucleus	transcription regulator	1.82252e-06	1.49995e-07	up	1.92033	1.92033	0.941357
Glucocorticoid Receptor Signaling	3.14	0.112	NaN	HMGB1	high mobility group box 1	Nucleus	transcription regulator	2.54517e-09	4.20881e-11	down	1.80664	-1.80664	-0.85331
Glucocorticoid Receptor Signaling	3.14	0.112	NaN	CXCL3	C-X-C motif chemokine ligand 3	Extracellular Space	cytokine	7.88992e-06	8.58302e-07	down	1.64767	-1.64767	-0.720423
Glucocorticoid Receptor Signaling	3.14	0.112	NaN	HSPA4	heat shock protein family A (Hsp70) member 4	Cytoplasm	other	9.11694e-08	3.87343e-09	down	1.56611	-1.56611	-0.64719
Glucocorticoid Receptor Signaling	3.14	0.112	NaN	PCK2	phosphoenolpyruvate carboxykinase 2, mitochondrial	Cytoplasm	kinase	2.2713e-08	6.77225e-10	down	2.03147	-2.03147	-1.02253
Glucocorticoid Receptor Signaling	3.14	0.112	NaN	BAG1	BCL2 associated athanogene 1	Cytoplasm	other	3.29976e-06	3.04649e-07	up	1.7896	1.7896	0.839637
Glucocorticoid Receptor Signaling	3.14	0.112	NaN	MAPK3	mitogen-activated protein kinase 3	Cytoplasm	kinase	4.35448e-07	2.63697e-08	down	1.70674	-1.70674	-0.77124
Glucocorticoid Receptor Signaling	3.14	0.112	NaN	FOXO3	forkhead box O3	Nucleus	transcription regulator	6.36945e-09	1.34477e-10	down	1.57783	-1.57783	-0.657943
Glucocorticoid Receptor Signaling	3.14	0.112	NaN	PRKAA2	protein kinase AMP-activated catalytic subunit alpha 2	Cytoplasm	kinase	2.10783e-08	6.11859e-10	up	2.56896	2.56896	1.36119
Glucocorticoid Receptor Signaling	3.14	0.112	NaN	GTF2H5	general transcription factor IIH subunit 5	Nucleus	other	4.80301e-06	4.74716e-07	down	1.68639	-1.68639	-0.75394
Glucocorticoid Receptor Signaling	3.14	0.112	NaN	AKT3	AKT serine/threonine kinase 3	Cytoplasm	kinase	6.87797e-06	7.27745e-07	down	1.6577	-1.6577	-0.72918
Glucocorticoid Receptor Signaling	3.14	0.112	NaN	POLR2L	RNA polymerase II subunit L	Nucleus	enzyme	3.57128e-10	2.89831e-12	up	1.50329	1.50329	0.58812
Glucocorticoid Receptor Signaling	3.14	0.112	NaN	GTF2H3	general transcription factor IIH subunit 3	Nucleus	transcription regulator	4.87575e-05	7.28875e-06	up	1.58991	1.58991	0.668947
Glucocorticoid Receptor Signaling	3.14	0.112	NaN	POLR2I	RNA polymerase II subunit I	Nucleus	transcription regulator	5.00112e-11	1.85759e-13	up	1.70927	1.70927	0.77338
Glucocorticoid Receptor Signaling	3.14	0.112	NaN	SMAD2	SMAD family member 2	Nucleus	transcription regulator	1.4095e-06	1.10481e-07	up	1.52286	1.52286	0.606787
Glucocorticoid Receptor Signaling	3.14	0.112	NaN	PIK3C2A	phosphatidylinositol-4-phosphate 3-kinase catalytic subunit type 2 alpha	Cytoplasm	kinase	2.82584e-06	2.52843e-07	down	1.59286	-1.59286	-0.671617
Glucocorticoid Receptor Signaling	3.14	0.112	NaN	MED1	mediator complex subunit 1	Nucleus	transcription regulator	1.04596e-07	4.63012e-09	down	1.53385	-1.53385	-0.61716
Glucocorticoid Receptor Signaling	3.14	0.112	NaN	FGFR1	fibroblast growth factor receptor 1	Plasma Membrane	kinase	0.000247191	4.8071e-05	up	1.50868	1.50868	0.59329
Glucocorticoid Receptor Signaling	3.14	0.112	NaN	SMARCE1	SWI/SNF related, matrix associated, actin dependent regulator of chromatin, subfamily e, member 1	Nucleus	transcription regulator	1.8058e-09	2.67377e-11	up	2.03758	2.03758	1.02685
Glucocorticoid Receptor Signaling	3.14	0.112	NaN	KRT80	keratin 80	Cytoplasm	other	7.29988e-08	2.91572e-09	down	1.59983	-1.59983	-0.677917
Glucocorticoid Receptor Signaling	3.14	0.112	NaN	TSG101	tumor susceptibility 101	Cytoplasm	transcription regulator	7.41641e-09	1.63962e-10	down	1.56909	-1.56909	-0.649927
Glucocorticoid Receptor Signaling	3.14	0.112	NaN	NCOA3	nuclear receptor coactivator 3	Nucleus	transcription regulator	4.90343e-08	1.8001e-09	up	2.10338	2.10338	1.07271
Glucocorticoid Receptor Signaling	3.14	0.112	NaN	PIK3R3	phosphoinositide-3-kinase regulatory subunit 3	Cytoplasm	kinase	8.33611e-08	3.4717e-09	down	1.6323	-1.6323	-0.706907
Glucocorticoid Receptor Signaling	3.14	0.112	NaN	KRT8	keratin 8	Cytoplasm	other	8.19524e-10	9.22607e-12	up	1.87335	1.87335	0.905617
Glucocorticoid Receptor Signaling	3.14	0.112	NaN	TAF5	TATA-box binding protein associated factor 5	Nucleus	transcription regulator	6.82206e-07	4.56459e-08	down	1.55999	-1.55999	-0.64154
Glucocorticoid Receptor Signaling	3.14	0.112	NaN	SMARCA2	SWI/SNF related, matrix associated, actin dependent regulator of chromatin, subfamily a, member 2	Nucleus	transcription regulator	1.06045e-07	4.71855e-09	down	1.55412	-1.55412	-0.636097
Glucocorticoid Receptor Signaling	3.14	0.112	NaN	FKBP4	FK506 binding protein 4	Nucleus	enzyme	2.04526e-10	1.38928e-12	up	1.91226	1.91226	0.935277
Glucocorticoid Receptor Signaling	3.14	0.112	NaN	NFATC2	nuclear factor of activated T-cells 2	Nucleus	transcription regulator	2.81161e-08	8.90543e-10	down	1.87801	-1.87801	-0.909203
Glucocorticoid Receptor Signaling	3.14	0.112	NaN	HSP90AA1	heat shock protein 90 alpha family class A member 1	Cytoplasm	enzyme	7.40107e-10	7.894e-12	up	1.62731	1.62731	0.70249
Glucocorticoid Receptor Signaling	3.14	0.112	NaN	PTGS2	prostaglandin-endoperoxide synthase 2	Cytoplasm	enzyme	7.99585e-06	8.7125e-07	down	1.80716	-1.80716	-0.853727
Glucocorticoid Receptor Signaling	3.14	0.112	NaN	SMARCC1	SWI/SNF related, matrix associated, actin dependent regulator of chromatin subfamily c member 1	Nucleus	transcription regulator	1.14545e-10	6.41563e-13	up	2.12213	2.12213	1.08551
Glucocorticoid Receptor Signaling	3.14	0.112	NaN	CSF2	colony stimulating factor 2	Extracellular Space	cytokine	7.85927e-07	5.44653e-08	down	1.51009	-1.51009	-0.594633
Glucocorticoid Receptor Signaling	3.14	0.112	NaN	PHF10	PHD finger protein 10	Nucleus	other	1.25289e-09	1.64154e-11	up	2.33051	2.33051	1.22064
Androgen Signaling	3.1	0.153	0	POLR2I	RNA polymerase II subunit I	Nucleus	transcription regulator	5.00112e-11	1.85759e-13	up	1.70927	1.70927	0.77338
Androgen Signaling	3.1	0.153	0	PRKACB	protein kinase cAMP-activated catalytic subunit beta	Cytoplasm	kinase	3.85749e-08	1.31897e-09	down	2.07728	-2.07728	-1.0547
Androgen Signaling	3.1	0.153	0	GNG4	G protein subunit gamma 4	Plasma Membrane	enzyme	2.89549e-05	3.96899e-06	down	1.50766	-1.50766	-0.592307
Androgen Signaling	3.1	0.153	0	GNA11	G protein subunit alpha 11	Plasma Membrane	enzyme	4.84133e-08	1.76622e-09	up	1.59017	1.59017	0.669177
Androgen Signaling	3.1	0.153	0	PRKAR2A	protein kinase cAMP-dependent type II regulatory subunit alpha	Cytoplasm	kinase	1.6572e-09	2.35652e-11	up	1.61798	1.61798	0.694197
Androgen Signaling	3.1	0.153	0	GNB5	G protein subunit beta 5	Plasma Membrane	enzyme	3.71155e-06	3.49654e-07	down	1.5287	-1.5287	-0.612307
Androgen Signaling	3.1	0.153	0	CCND1	cyclin D1	Nucleus	transcription regulator	6.00024e-10	5.95338e-12	down	2.30478	-2.30478	-1.20463
Androgen Signaling	3.1	0.153	0	GNB4	G protein subunit beta 4	Plasma Membrane	enzyme	2.91359e-06	2.6225e-07	down	1.9306	-1.9306	-0.949047
Androgen Signaling	3.1	0.153	0	GNAI3	G protein subunit alpha i3	Cytoplasm	enzyme	1.09582e-07	4.92056e-09	down	1.51852	-1.51852	-0.602667
Androgen Signaling	3.1	0.153	0	HSPA4	heat shock protein family A (Hsp70) member 4	Cytoplasm	other	9.11694e-08	3.87343e-09	down	1.56611	-1.56611	-0.64719
Androgen Signaling	3.1	0.153	0	PRKAR2B	protein kinase cAMP-dependent type II regulatory subunit beta	Cytoplasm	kinase	1.11727e-05	1.29359e-06	up	1.57564	1.57564	0.655937
Androgen Signaling	3.1	0.153	0	MAPK3	mitogen-activated protein kinase 3	Cytoplasm	kinase	4.35448e-07	2.63697e-08	down	1.70674	-1.70674	-0.77124
Androgen Signaling	3.1	0.153	0	GTF2H5	general transcription factor IIH subunit 5	Nucleus	other	4.80301e-06	4.74716e-07	down	1.68639	-1.68639	-0.75394
Androgen Signaling	3.1	0.153	0	HSP90AA1	heat shock protein 90 alpha family class A member 1	Cytoplasm	enzyme	7.40107e-10	7.894e-12	up	1.62731	1.62731	0.70249
Androgen Signaling	3.1	0.153	0	PRKCE	protein kinase C epsilon	Cytoplasm	kinase	5.22833e-10	4.84166e-12	down	2.01678	-2.01678	-1.01205
Androgen Signaling	3.1	0.153	0	POLR2L	RNA polymerase II subunit L	Nucleus	enzyme	3.57128e-10	2.89831e-12	up	1.50329	1.50329	0.58812
Androgen Signaling	3.1	0.153	0	GTF2H3	general transcription factor IIH subunit 3	Nucleus	transcription regulator	4.87575e-05	7.28875e-06	up	1.58991	1.58991	0.668947
Role of Tissue Factor in Cancer	3.01	0.146	NaN	PIK3C2A	phosphatidylinositol-4-phosphate 3-kinase catalytic subunit type 2 alpha	Cytoplasm	kinase	2.82584e-06	2.52843e-07	down	1.59286	-1.59286	-0.671617
Role of Tissue Factor in Cancer	3.01	0.146	NaN	FGFR1	fibroblast growth factor receptor 1	Plasma Membrane	kinase	0.000247191	4.8071e-05	up	1.50868	1.50868	0.59329
Role of Tissue Factor in Cancer	3.01	0.146	NaN	GNA11	G protein subunit alpha 11	Plasma Membrane	enzyme	4.84133e-08	1.76622e-09	up	1.59017	1.59017	0.669177
Role of Tissue Factor in Cancer	3.01	0.146	NaN	ITGA6	integrin subunit alpha 6	Plasma Membrane	transmembrane receptor	4.16708e-10	3.60446e-12	down	1.9976	-1.9976	-0.99827
Role of Tissue Factor in Cancer	3.01	0.146	NaN	VEGFC	vascular endothelial growth factor C	Extracellular Space	growth factor	3.58259e-08	1.19581e-09	down	1.61553	-1.61553	-0.692007
Role of Tissue Factor in Cancer	3.01	0.146	NaN	F3	coagulation factor III, tissue factor	Plasma Membrane	transmembrane receptor	7.95472e-09	1.77482e-10	up	1.70789	1.70789	0.772217
Role of Tissue Factor in Cancer	3.01	0.146	NaN	EIF4E	eukaryotic translation initiation factor 4E	Cytoplasm	translation regulator	1.1558e-09	1.44963e-11	down	2.9448	-2.9448	-1.55817
Role of Tissue Factor in Cancer	3.01	0.146	NaN	ITGB3	integrin subunit beta 3	Plasma Membrane	transmembrane receptor	2.10739e-06	1.77301e-07	down	1.98681	-1.98681	-0.990453
Role of Tissue Factor in Cancer	3.01	0.146	NaN	PTEN	phosphatase and tensin homolog	Cytoplasm	phosphatase	4.30522e-08	1.52354e-09	down	2.05755	-2.05755	-1.04093
Role of Tissue Factor in Cancer	3.01	0.146	NaN	PIK3R3	phosphoinositide-3-kinase regulatory subunit 3	Cytoplasm	kinase	8.33611e-08	3.4717e-09	down	1.6323	-1.6323	-0.706907
Role of Tissue Factor in Cancer	3.01	0.146	NaN	MTOR	mechanistic target of rapamycin	Nucleus	kinase	2.15174e-08	6.28984e-10	up	1.65752	1.65752	0.729023
Role of Tissue Factor in Cancer	3.01	0.146	NaN	CFL2	cofilin 2	Extracellular Space	other	1.08471e-11	2.31805e-14	down	2.63909	-2.63909	-1.40004
Role of Tissue Factor in Cancer	3.01	0.146	NaN	CDC42	cell division cycle 42	Cytoplasm	enzyme	7.68247e-08	3.11153e-09	up	1.53845	1.53845	0.621477
Role of Tissue Factor in Cancer	3.01	0.146	NaN	MAPK3	mitogen-activated protein kinase 3	Cytoplasm	kinase	4.35448e-07	2.63697e-08	down	1.70674	-1.70674	-0.77124
Role of Tissue Factor in Cancer	3.01	0.146	NaN	AKT3	AKT serine/threonine kinase 3	Cytoplasm	kinase	6.87797e-06	7.27745e-07	down	1.6577	-1.6577	-0.72918
Role of Tissue Factor in Cancer	3.01	0.146	NaN	RPS6KA1	ribosomal protein S6 kinase A1	Cytoplasm	kinase	3.83157e-08	1.30677e-09	down	1.61813	-1.61813	-0.694327
Role of Tissue Factor in Cancer	3.01	0.146	NaN	CSF2	colony stimulating factor 2	Extracellular Space	cytokine	7.85927e-07	5.44653e-08	down	1.51009	-1.51009	-0.594633
Role of Tissue Factor in Cancer	3.01	0.146	NaN	EGFR	epidermal growth factor receptor	Plasma Membrane	kinase	7.80544e-08	3.18516e-09	down	1.65723	-1.65723	-0.728773
Hypoxia Signaling in the Cardiovascular System	3.01	0.173	0.447	UBE2A	ubiquitin conjugating enzyme E2 A	Cytoplasm	enzyme	2.8489e-10	2.21058e-12	up	1.66321	1.66321	0.733973
Hypoxia Signaling in the Cardiovascular System	3.01	0.173	0.447	UBE2R2	ubiquitin conjugating enzyme E2 R2	Cytoplasm	enzyme	2.82367e-09	4.80586e-11	down	1.96054	-1.96054	-0.971253
Hypoxia Signaling in the Cardiovascular System	3.01	0.173	0.447	NQO1	NAD(P)H quinone dehydrogenase 1	Cytoplasm	enzyme	1.84774e-10	1.1987e-12	down	1.6793	-1.6793	-0.74786
Hypoxia Signaling in the Cardiovascular System	3.01	0.173	0.447	CREB5	cAMP responsive element binding protein 5	Nucleus	transcription regulator	7.24769e-06	7.75162e-07	down	1.82782	-1.82782	-0.870123
Hypoxia Signaling in the Cardiovascular System	3.01	0.173	0.447	UBE2F	ubiquitin conjugating enzyme E2 F (putative)	Cytoplasm	enzyme	2.99514e-06	2.70886e-07	up	1.58603	1.58603	0.665417
Hypoxia Signaling in the Cardiovascular System	3.01	0.173	0.447	PTEN	phosphatase and tensin homolog	Cytoplasm	phosphatase	4.30522e-08	1.52354e-09	down	2.05755	-2.05755	-1.04093
Hypoxia Signaling in the Cardiovascular System	3.01	0.173	0.447	UBE2D2	ubiquitin conjugating enzyme E2 D2	Cytoplasm	enzyme	4.5069e-06	4.38571e-07	down	1.78905	-1.78905	-0.839197
Hypoxia Signaling in the Cardiovascular System	3.01	0.173	0.447	UBE2J1	ubiquitin conjugating enzyme E2 J1	Cytoplasm	enzyme	5.18346e-11	2.044e-13	down	2.86283	-2.86283	-1.51744
Hypoxia Signaling in the Cardiovascular System	3.01	0.173	0.447	EDN1	endothelin 1	Extracellular Space	cytokine	2.19861e-07	1.1584e-08	up	1.88989	1.88989	0.918303
Hypoxia Signaling in the Cardiovascular System	3.01	0.173	0.447	HIF1AN	hypoxia inducible factor 1 alpha subunit inhibitor	Nucleus	enzyme	2.14823e-07	1.12366e-08	down	1.69941	-1.69941	-0.765033
Hypoxia Signaling in the Cardiovascular System	3.01	0.173	0.447	UBE2K	ubiquitin conjugating enzyme E2 K	Cytoplasm	transcription regulator	5.18346e-11	2.03242e-13	down	2.12372	-2.12372	-1.08659
Hypoxia Signaling in the Cardiovascular System	3.01	0.173	0.447	HSP90AA1	heat shock protein 90 alpha family class A member 1	Cytoplasm	enzyme	7.40107e-10	7.894e-12	up	1.62731	1.62731	0.70249
Hypoxia Signaling in the Cardiovascular System	3.01	0.173	0.447	VHL	von Hippel-Lindau tumor suppressor	Nucleus	transcription regulator	4.07837e-09	7.54312e-11	down	1.58979	-1.58979	-0.668833
Phosphatidylglycerol Biosynthesis II (Non-plastidic)	2.98	0.269	NaN	GPAM	glycerol-3-phosphate acyltransferase, mitochondrial	Cytoplasm	enzyme	7.09847e-09	1.54947e-10	up	1.80746	1.80746	0.853963
Phosphatidylglycerol Biosynthesis II (Non-plastidic)	2.98	0.269	NaN	AGPAT5	1-acylglycerol-3-phosphate O-acyltransferase 5	Cytoplasm	enzyme	1.97294e-06	1.64131e-07	down	1.60997	-1.60997	-0.68703
Phosphatidylglycerol Biosynthesis II (Non-plastidic)	2.98	0.269	NaN	ABHD5	abhydrolase domain containing 5	Cytoplasm	enzyme	6.33726e-08	2.46029e-09	down	1.91445	-1.91445	-0.936933
Phosphatidylglycerol Biosynthesis II (Non-plastidic)	2.98	0.269	NaN	LPCAT3	lysophosphatidylcholine acyltransferase 3	Plasma Membrane	enzyme	3.27821e-07	1.87817e-08	up	1.55499	1.55499	0.636903
Phosphatidylglycerol Biosynthesis II (Non-plastidic)	2.98	0.269	NaN	GPAT3	glycerol-3-phosphate acyltransferase 3	Cytoplasm	enzyme	1.01908e-05	1.16201e-06	down	1.72312	-1.72312	-0.785023
Phosphatidylglycerol Biosynthesis II (Non-plastidic)	2.98	0.269	NaN	LPGAT1	lysophosphatidylglycerol acyltransferase 1	Cytoplasm	enzyme	4.66971e-09	8.91007e-11	down	1.71612	-1.71612	-0.779153
Phosphatidylglycerol Biosynthesis II (Non-plastidic)	2.98	0.269	NaN	CDS2	CDP-diacylglycerol synthase 2	Cytoplasm	enzyme	3.27825e-10	2.62294e-12	up	1.95834	1.95834	0.96963
Protein Ubiquitination Pathway	2.97	0.117	NaN	UBE2A	ubiquitin conjugating enzyme E2 A	Cytoplasm	enzyme	2.8489e-10	2.21058e-12	up	1.66321	1.66321	0.733973
Protein Ubiquitination Pathway	2.97	0.117	NaN	CDC23	cell division cycle 23	Nucleus	enzyme	6.65717e-09	1.4379e-10	down	1.56254	-1.56254	-0.643897
Protein Ubiquitination Pathway	2.97	0.117	NaN	DNAJC15	DnaJ heat shock protein family (Hsp40) member C15	Cytoplasm	other	1.47641e-06	1.16992e-07	down	1.78116	-1.78116	-0.832813
Protein Ubiquitination Pathway	2.97	0.117	NaN	UBE4A	ubiquitination factor E4A	Cytoplasm	enzyme	2.92249e-09	5.03352e-11	down	2.02332	-2.02332	-1.01672
Protein Ubiquitination Pathway	2.97	0.117	NaN	UBE2F	ubiquitin conjugating enzyme E2 F (putative)	Cytoplasm	enzyme	2.99514e-06	2.70886e-07	up	1.58603	1.58603	0.665417
Protein Ubiquitination Pathway	2.97	0.117	NaN	HSPA4	heat shock protein family A (Hsp70) member 4	Cytoplasm	other	9.11694e-08	3.87343e-09	down	1.56611	-1.56611	-0.64719
Protein Ubiquitination Pathway	2.97	0.117	NaN	BAG1	BCL2 associated athanogene 1	Cytoplasm	other	3.29976e-06	3.04649e-07	up	1.7896	1.7896	0.839637
Protein Ubiquitination Pathway	2.97	0.117	NaN	USP42	ubiquitin specific peptidase 42	Nucleus	peptidase	7.05773e-06	7.50895e-07	up	1.53416	1.53416	0.617453
Protein Ubiquitination Pathway	2.97	0.117	NaN	USP47	ubiquitin specific peptidase 47	Cytoplasm	peptidase	1.65064e-08	4.4846e-10	down	2.00216	-2.00216	-1.00156
Protein Ubiquitination Pathway	2.97	0.117	NaN	UBE2K	ubiquitin conjugating enzyme E2 K	Cytoplasm	transcription regulator	5.18346e-11	2.03242e-13	down	2.12372	-2.12372	-1.08659
Protein Ubiquitination Pathway	2.97	0.117	NaN	NEDD4L	neural precursor cell expressed, developmentally down-regulated 4-like, E3 ubiquitin protein ligase	Cytoplasm	enzyme	1.243e-06	9.45645e-08	up	1.50468	1.50468	0.58946
Protein Ubiquitination Pathway	2.97	0.117	NaN	BRCA1	BRCA1, DNA repair associated	Nucleus	transcription regulator	2.40849e-06	2.07963e-07	down	1.52917	-1.52917	-0.612753
Protein Ubiquitination Pathway	2.97	0.117	NaN	NEDD4	neural precursor cell expressed, developmentally down-regulated 4, E3 ubiquitin protein ligase	Cytoplasm	enzyme	9.05081e-09	2.07464e-10	up	1.72618	1.72618	0.78758
Protein Ubiquitination Pathway	2.97	0.117	NaN	MED20	mediator complex subunit 20	Nucleus	transcription regulator	3.63817e-08	1.2206e-09	down	1.61798	-1.61798	-0.694197
Protein Ubiquitination Pathway	2.97	0.117	NaN	DNAJC27	DnaJ heat shock protein family (Hsp40) member C27	Cytoplasm	enzyme	2.60749e-07	1.42358e-08	down	2.22876	-2.22876	-1.15624
Protein Ubiquitination Pathway	2.97	0.117	NaN	DNAJC19	DnaJ heat shock protein family (Hsp40) member C19	Cytoplasm	other	8.70191e-06	9.6609e-07	down	1.58634	-1.58634	-0.6657
Protein Ubiquitination Pathway	2.97	0.117	NaN	UBE2R2	ubiquitin conjugating enzyme E2 R2	Cytoplasm	enzyme	2.82367e-09	4.80586e-11	down	1.96054	-1.96054	-0.971253
Protein Ubiquitination Pathway	2.97	0.117	NaN	PSMD5	proteasome 26S subunit, non-ATPase 5	Other	other	5.18346e-11	2.02796e-13	down	2.13434	-2.13434	-1.09379
Protein Ubiquitination Pathway	2.97	0.117	NaN	USP1	ubiquitin specific peptidase 1	Cytoplasm	peptidase	7.49859e-12	1.23825e-14	down	1.94462	-1.94462	-0.95949
Protein Ubiquitination Pathway	2.97	0.117	NaN	DNAJB9	DnaJ heat shock protein family (Hsp40) member B9	Nucleus	other	6.39291e-08	2.4884e-09	down	1.85901	-1.85901	-0.894533
Protein Ubiquitination Pathway	2.97	0.117	NaN	UBE3A	ubiquitin protein ligase E3A	Nucleus	enzyme	1.12376e-08	2.736e-10	up	1.51407	1.51407	0.598433
Protein Ubiquitination Pathway	2.97	0.117	NaN	SKP2	S-phase kinase associated protein 2	Nucleus	enzyme	5.42465e-07	3.47364e-08	down	1.88081	-1.88081	-0.911357
Protein Ubiquitination Pathway	2.97	0.117	NaN	UBE2D2	ubiquitin conjugating enzyme E2 D2	Cytoplasm	enzyme	4.5069e-06	4.38571e-07	down	1.78905	-1.78905	-0.839197
Protein Ubiquitination Pathway	2.97	0.117	NaN	UBE2J1	ubiquitin conjugating enzyme E2 J1	Cytoplasm	enzyme	5.18346e-11	2.044e-13	down	2.86283	-2.86283	-1.51744
Protein Ubiquitination Pathway	2.97	0.117	NaN	HSPA13	heat shock protein family A (Hsp70) member 13	Cytoplasm	other	6.08138e-06	6.29535e-07	down	1.57355	-1.57355	-0.65402
Protein Ubiquitination Pathway	2.97	0.117	NaN	HSP90AA1	heat shock protein 90 alpha family class A member 1	Cytoplasm	enzyme	7.40107e-10	7.894e-12	up	1.62731	1.62731	0.70249
Protein Ubiquitination Pathway	2.97	0.117	NaN	USP46	ubiquitin specific peptidase 46	Other	peptidase	4.80052e-08	1.74661e-09	down	2.58287	-2.58287	-1.36898
Protein Ubiquitination Pathway	2.97	0.117	NaN	SMURF2	SMAD specific E3 ubiquitin protein ligase 2	Cytoplasm	enzyme	7.88387e-10	8.76498e-12	up	1.82871	1.82871	0.870823
Protein Ubiquitination Pathway	2.97	0.117	NaN	USP37	ubiquitin specific peptidase 37	Nucleus	peptidase	9.80116e-08	4.24891e-09	down	1.85681	-1.85681	-0.892827
Protein Ubiquitination Pathway	2.97	0.117	NaN	USP25	ubiquitin specific peptidase 25	Cytoplasm	peptidase	2.63184e-08	8.15524e-10	down	1.86334	-1.86334	-0.897893
Protein Ubiquitination Pathway	2.97	0.117	NaN	VHL	von Hippel-Lindau tumor suppressor	Nucleus	transcription regulator	4.07837e-09	7.54312e-11	down	1.58979	-1.58979	-0.668833
Regulation of eIF4 and p70S6K Signaling	2.9	0.134	-0.302	EIF4EBP2	eukaryotic translation initiation factor 4E binding protein 2	Cytoplasm	translation regulator	9.16893e-07	6.54074e-08	down	1.95452	-1.95452	-0.966817
Regulation of eIF4 and p70S6K Signaling	2.9	0.134	-0.302	PIK3C2A	phosphatidylinositol-4-phosphate 3-kinase catalytic subunit type 2 alpha	Cytoplasm	kinase	2.82584e-06	2.52843e-07	down	1.59286	-1.59286	-0.671617
Regulation of eIF4 and p70S6K Signaling	2.9	0.134	-0.302	FGFR1	fibroblast growth factor receptor 1	Plasma Membrane	kinase	0.000247191	4.8071e-05	up	1.50868	1.50868	0.59329
Regulation of eIF4 and p70S6K Signaling	2.9	0.134	-0.302	ITGA2	integrin subunit alpha 2	Plasma Membrane	transmembrane receptor	1.38403e-07	6.53158e-09	up	1.86016	1.86016	0.895423
Regulation of eIF4 and p70S6K Signaling	2.9	0.134	-0.302	ITGA5	integrin subunit alpha 5	Plasma Membrane	transmembrane receptor	2.35836e-10	1.66796e-12	down	2.56143	-2.56143	-1.35695
Regulation of eIF4 and p70S6K Signaling	2.9	0.134	-0.302	PDPK1	3-phosphoinositide dependent protein kinase 1	Cytoplasm	kinase	1.1086e-07	4.99204e-09	up	1.65403	1.65403	0.725987
Regulation of eIF4 and p70S6K Signaling	2.9	0.134	-0.302	EIF2S1	eukaryotic translation initiation factor 2 subunit alpha	Cytoplasm	translation regulator	5.93614e-12	6.81658e-15	up	2.51784	2.51784	1.33219
Regulation of eIF4 and p70S6K Signaling	2.9	0.134	-0.302	EIF4E	eukaryotic translation initiation factor 4E	Cytoplasm	translation regulator	1.1558e-09	1.44963e-11	down	2.9448	-2.9448	-1.55817
Regulation of eIF4 and p70S6K Signaling	2.9	0.134	-0.302	EIF2A	eukaryotic translation initiation factor 2A	Cytoplasm	translation regulator	2.26999e-09	3.62744e-11	up	1.62442	1.62442	0.699923
Regulation of eIF4 and p70S6K Signaling	2.9	0.134	-0.302	PPP2R5A	protein phosphatase 2 regulatory subunit B'alpha	Cytoplasm	phosphatase	4.36257e-10	3.81011e-12	up	1.99923	1.99923	0.999443
Regulation of eIF4 and p70S6K Signaling	2.9	0.134	-0.302	EIF2S2	eukaryotic translation initiation factor 2 subunit beta	Cytoplasm	translation regulator	1.22209e-10	7.0062e-13	down	2.37305	-2.37305	-1.24674
Regulation of eIF4 and p70S6K Signaling	2.9	0.134	-0.302	PIK3R3	phosphoinositide-3-kinase regulatory subunit 3	Cytoplasm	kinase	8.33611e-08	3.4717e-09	down	1.6323	-1.6323	-0.706907
Regulation of eIF4 and p70S6K Signaling	2.9	0.134	-0.302	MTOR	mechanistic target of rapamycin	Nucleus	kinase	2.15174e-08	6.28984e-10	up	1.65752	1.65752	0.729023
Regulation of eIF4 and p70S6K Signaling	2.9	0.134	-0.302	MAPK3	mitogen-activated protein kinase 3	Cytoplasm	kinase	4.35448e-07	2.63697e-08	down	1.70674	-1.70674	-0.77124
Regulation of eIF4 and p70S6K Signaling	2.9	0.134	-0.302	PAIP1	poly(A) binding protein interacting protein 1	Cytoplasm	translation regulator	2.76333e-11	8.64704e-14	up	3.7732	3.7732	1.91579
Regulation of eIF4 and p70S6K Signaling	2.9	0.134	-0.302	EIF2B1	eukaryotic translation initiation factor 2B subunit alpha	Cytoplasm	translation regulator	1.06938e-07	4.77877e-09	up	1.5176	1.5176	0.60179
Regulation of eIF4 and p70S6K Signaling	2.9	0.134	-0.302	AKT3	AKT serine/threonine kinase 3	Cytoplasm	kinase	6.87797e-06	7.27745e-07	down	1.6577	-1.6577	-0.72918
Regulation of eIF4 and p70S6K Signaling	2.9	0.134	-0.302	RPS2	ribosomal protein S2	Cytoplasm	other	9.89882e-07	7.20382e-08	up	1.50996	1.50996	0.594513
Regulation of eIF4 and p70S6K Signaling	2.9	0.134	-0.302	AGO1	argonaute 1, RISC catalytic component	Cytoplasm	translation regulator	1.78782e-09	2.6335e-11	down	1.78921	-1.78921	-0.839327
Regulation of eIF4 and p70S6K Signaling	2.9	0.134	-0.302	PPP2R1B	protein phosphatase 2 scaffold subunit Abeta	Plasma Membrane	phosphatase	1.07505e-10	5.86427e-13	down	3.55737	-3.55737	-1.83081
Regulation of eIF4 and p70S6K Signaling	2.9	0.134	-0.302	AGO4	argonaute 4, RISC catalytic component	Cytoplasm	translation regulator	2.81612e-05	3.82796e-06	down	1.7371	-1.7371	-0.796677
Amyloid Processing	2.85	0.196	NaN	PRKACB	protein kinase cAMP-activated catalytic subunit beta	Cytoplasm	kinase	3.85749e-08	1.31897e-09	down	2.07728	-2.07728	-1.0547
Amyloid Processing	2.85	0.196	NaN	CSNK2A2	casein kinase 2 alpha 2	Cytoplasm	kinase	6.838e-06	7.22554e-07	up	1.75656	1.75656	0.812757
Amyloid Processing	2.85	0.196	NaN	PRKAR2B	protein kinase cAMP-dependent type II regulatory subunit beta	Cytoplasm	kinase	1.11727e-05	1.29359e-06	up	1.57564	1.57564	0.655937
Amyloid Processing	2.85	0.196	NaN	MAPK3	mitogen-activated protein kinase 3	Cytoplasm	kinase	4.35448e-07	2.63697e-08	down	1.70674	-1.70674	-0.77124
Amyloid Processing	2.85	0.196	NaN	PRKAR2A	protein kinase cAMP-dependent type II regulatory subunit alpha	Cytoplasm	kinase	1.6572e-09	2.35652e-11	up	1.61798	1.61798	0.694197
Amyloid Processing	2.85	0.196	NaN	MARK1	microtubule affinity regulating kinase 1	Cytoplasm	kinase	4.08951e-07	2.44703e-08	down	1.81873	-1.81873	-0.862933
Amyloid Processing	2.85	0.196	NaN	AKT3	AKT serine/threonine kinase 3	Cytoplasm	kinase	6.87797e-06	7.27745e-07	down	1.6577	-1.6577	-0.72918
Amyloid Processing	2.85	0.196	NaN	APH1B	aph-1 homolog B, gamma-secretase subunit	Other	peptidase	2.06887e-08	5.98971e-10	down	1.88418	-1.88418	-0.91394
Amyloid Processing	2.85	0.196	NaN	PRKCE	protein kinase C epsilon	Cytoplasm	kinase	5.22833e-10	4.84166e-12	down	2.01678	-2.01678	-1.01205
Amyloid Processing	2.85	0.196	NaN	GSK3B	glycogen synthase kinase 3 beta	Nucleus	kinase	2.55367e-07	1.38835e-08	up	1.64288	1.64288	0.71623
ErbB2-ErbB3 Signaling	2.83	0.174	-0.577	NRG1	neuregulin 1	Plasma Membrane	growth factor	3.52503e-10	2.84582e-12	down	1.97673	-1.97673	-0.983117
ErbB2-ErbB3 Signaling	2.83	0.174	-0.577	PIK3R3	phosphoinositide-3-kinase regulatory subunit 3	Cytoplasm	kinase	8.33611e-08	3.4717e-09	down	1.6323	-1.6323	-0.706907
ErbB2-ErbB3 Signaling	2.83	0.174	-0.577	BAD	BCL2 associated agonist of cell death	Cytoplasm	other	1.34915e-08	3.45293e-10	up	1.5081	1.5081	0.59273
ErbB2-ErbB3 Signaling	2.83	0.174	-0.577	FOXO1	forkhead box O1	Nucleus	transcription regulator	1.76954e-08	4.93401e-10	down	1.83353	-1.83353	-0.87462
ErbB2-ErbB3 Signaling	2.83	0.174	-0.577	PIK3C2A	phosphatidylinositol-4-phosphate 3-kinase catalytic subunit type 2 alpha	Cytoplasm	kinase	2.82584e-06	2.52843e-07	down	1.59286	-1.59286	-0.671617
ErbB2-ErbB3 Signaling	2.83	0.174	-0.577	MAPK3	mitogen-activated protein kinase 3	Cytoplasm	kinase	4.35448e-07	2.63697e-08	down	1.70674	-1.70674	-0.77124
ErbB2-ErbB3 Signaling	2.83	0.174	-0.577	FGFR1	fibroblast growth factor receptor 1	Plasma Membrane	kinase	0.000247191	4.8071e-05	up	1.50868	1.50868	0.59329
ErbB2-ErbB3 Signaling	2.83	0.174	-0.577	PDPK1	3-phosphoinositide dependent protein kinase 1	Cytoplasm	kinase	1.1086e-07	4.99204e-09	up	1.65403	1.65403	0.725987
ErbB2-ErbB3 Signaling	2.83	0.174	-0.577	ERBB3	erb-b2 receptor tyrosine kinase 3	Plasma Membrane	kinase	3.01109e-07	1.69449e-08	up	1.67148	1.67148	0.741127
ErbB2-ErbB3 Signaling	2.83	0.174	-0.577	GSK3B	glycogen synthase kinase 3 beta	Nucleus	kinase	2.55367e-07	1.38835e-08	up	1.64288	1.64288	0.71623
ErbB2-ErbB3 Signaling	2.83	0.174	-0.577	CCND1	cyclin D1	Nucleus	transcription regulator	6.00024e-10	5.95338e-12	down	2.30478	-2.30478	-1.20463
ErbB2-ErbB3 Signaling	2.83	0.174	-0.577	PTEN	phosphatase and tensin homolog	Cytoplasm	phosphatase	4.30522e-08	1.52354e-09	down	2.05755	-2.05755	-1.04093
G Beta Gamma Signaling	2.82	0.159	-0.577	PRKACB	protein kinase cAMP-activated catalytic subunit beta	Cytoplasm	kinase	3.85749e-08	1.31897e-09	down	2.07728	-2.07728	-1.0547
G Beta Gamma Signaling	2.82	0.159	-0.577	GNG4	G protein subunit gamma 4	Plasma Membrane	enzyme	2.89549e-05	3.96899e-06	down	1.50766	-1.50766	-0.592307
G Beta Gamma Signaling	2.82	0.159	-0.577	GNA11	G protein subunit alpha 11	Plasma Membrane	enzyme	4.84133e-08	1.76622e-09	up	1.59017	1.59017	0.669177
G Beta Gamma Signaling	2.82	0.159	-0.577	PRKAR2A	protein kinase cAMP-dependent type II regulatory subunit alpha	Cytoplasm	kinase	1.6572e-09	2.35652e-11	up	1.61798	1.61798	0.694197
G Beta Gamma Signaling	2.82	0.159	-0.577	GNB5	G protein subunit beta 5	Plasma Membrane	enzyme	3.71155e-06	3.49654e-07	down	1.5287	-1.5287	-0.612307
G Beta Gamma Signaling	2.82	0.159	-0.577	PDPK1	3-phosphoinositide dependent protein kinase 1	Cytoplasm	kinase	1.1086e-07	4.99204e-09	up	1.65403	1.65403	0.725987
G Beta Gamma Signaling	2.82	0.159	-0.577	GNB4	G protein subunit beta 4	Plasma Membrane	enzyme	2.91359e-06	2.6225e-07	down	1.9306	-1.9306	-0.949047
G Beta Gamma Signaling	2.82	0.159	-0.577	GNAI3	G protein subunit alpha i3	Cytoplasm	enzyme	1.09582e-07	4.92056e-09	down	1.51852	-1.51852	-0.602667
G Beta Gamma Signaling	2.82	0.159	-0.577	PRKAR2B	protein kinase cAMP-dependent type II regulatory subunit beta	Cytoplasm	kinase	1.11727e-05	1.29359e-06	up	1.57564	1.57564	0.655937
G Beta Gamma Signaling	2.82	0.159	-0.577	CDC42	cell division cycle 42	Cytoplasm	enzyme	7.68247e-08	3.11153e-09	up	1.53845	1.53845	0.621477
G Beta Gamma Signaling	2.82	0.159	-0.577	MAPK3	mitogen-activated protein kinase 3	Cytoplasm	kinase	4.35448e-07	2.63697e-08	down	1.70674	-1.70674	-0.77124
G Beta Gamma Signaling	2.82	0.159	-0.577	PRKCE	protein kinase C epsilon	Cytoplasm	kinase	5.22833e-10	4.84166e-12	down	2.01678	-2.01678	-1.01205
G Beta Gamma Signaling	2.82	0.159	-0.577	AKT3	AKT serine/threonine kinase 3	Cytoplasm	kinase	6.87797e-06	7.27745e-07	down	1.6577	-1.6577	-0.72918
G Beta Gamma Signaling	2.82	0.159	-0.577	EGFR	epidermal growth factor receptor	Plasma Membrane	kinase	7.80544e-08	3.18516e-09	down	1.65723	-1.65723	-0.728773
Colorectal Cancer Metastasis Signaling	2.81	0.117	-3	PRKACB	protein kinase cAMP-activated catalytic subunit beta	Cytoplasm	kinase	3.85749e-08	1.31897e-09	down	2.07728	-2.07728	-1.0547
Colorectal Cancer Metastasis Signaling	2.81	0.117	-3	IL6ST	interleukin 6 signal transducer	Plasma Membrane	transmembrane receptor	6.03046e-08	2.32431e-09	down	1.62111	-1.62111	-0.696983
Colorectal Cancer Metastasis Signaling	2.81	0.117	-3	JAK1	Janus kinase 1	Cytoplasm	kinase	1.06066e-06	7.81996e-08	down	1.54581	-1.54581	-0.62836
Colorectal Cancer Metastasis Signaling	2.81	0.117	-3	WNT3	Wnt family member 3	Extracellular Space	other	1.4617e-05	1.78124e-06	down	1.50754	-1.50754	-0.5922
Colorectal Cancer Metastasis Signaling	2.81	0.117	-3	BAD	BCL2 associated agonist of cell death	Cytoplasm	other	1.34915e-08	3.45293e-10	up	1.5081	1.5081	0.59273
Colorectal Cancer Metastasis Signaling	2.81	0.117	-3	MMP3	matrix metallopeptidase 3	Extracellular Space	peptidase	4.25291e-06	4.11366e-07	down	2.59578	-2.59578	-1.37617
Colorectal Cancer Metastasis Signaling	2.81	0.117	-3	MMP14	matrix metallopeptidase 14	Extracellular Space	peptidase	5.54164e-06	5.6478e-07	down	1.52475	-1.52475	-0.608573
Colorectal Cancer Metastasis Signaling	2.81	0.117	-3	GNB5	G protein subunit beta 5	Plasma Membrane	enzyme	3.71155e-06	3.49654e-07	down	1.5287	-1.5287	-0.612307
Colorectal Cancer Metastasis Signaling	2.81	0.117	-3	CCND1	cyclin D1	Nucleus	transcription regulator	6.00024e-10	5.95338e-12	down	2.30478	-2.30478	-1.20463
Colorectal Cancer Metastasis Signaling	2.81	0.117	-3	GNB4	G protein subunit beta 4	Plasma Membrane	enzyme	2.91359e-06	2.6225e-07	down	1.9306	-1.9306	-0.949047
Colorectal Cancer Metastasis Signaling	2.81	0.117	-3	APPL1	adaptor protein, phosphotyrosine interacting with PH domain and leucine zipper 1	Cytoplasm	other	6.63374e-09	1.43115e-10	up	1.60928	1.60928	0.686417
Colorectal Cancer Metastasis Signaling	2.81	0.117	-3	MAPK3	mitogen-activated protein kinase 3	Cytoplasm	kinase	4.35448e-07	2.63697e-08	down	1.70674	-1.70674	-0.77124
Colorectal Cancer Metastasis Signaling	2.81	0.117	-3	AKT3	AKT serine/threonine kinase 3	Cytoplasm	kinase	6.87797e-06	7.27745e-07	down	1.6577	-1.6577	-0.72918
Colorectal Cancer Metastasis Signaling	2.81	0.117	-3	GSK3B	glycogen synthase kinase 3 beta	Nucleus	kinase	2.55367e-07	1.38835e-08	up	1.64288	1.64288	0.71623
Colorectal Cancer Metastasis Signaling	2.81	0.117	-3	EGFR	epidermal growth factor receptor	Plasma Membrane	kinase	7.80544e-08	3.18516e-09	down	1.65723	-1.65723	-0.728773
Colorectal Cancer Metastasis Signaling	2.81	0.117	-3	GNG4	G protein subunit gamma 4	Plasma Membrane	enzyme	2.89549e-05	3.96899e-06	down	1.50766	-1.50766	-0.592307
Colorectal Cancer Metastasis Signaling	2.81	0.117	-3	SMAD2	SMAD family member 2	Nucleus	transcription regulator	1.4095e-06	1.10481e-07	up	1.52286	1.52286	0.606787
Colorectal Cancer Metastasis Signaling	2.81	0.117	-3	PIK3C2A	phosphatidylinositol-4-phosphate 3-kinase catalytic subunit type 2 alpha	Cytoplasm	kinase	2.82584e-06	2.52843e-07	down	1.59286	-1.59286	-0.671617
Colorectal Cancer Metastasis Signaling	2.81	0.117	-3	GRK3	G protein-coupled receptor kinase 3	Cytoplasm	kinase	1.20362e-05	1.41499e-06	down	1.63393	-1.63393	-0.708343
Colorectal Cancer Metastasis Signaling	2.81	0.117	-3	FGFR1	fibroblast growth factor receptor 1	Plasma Membrane	kinase	0.000247191	4.8071e-05	up	1.50868	1.50868	0.59329
Colorectal Cancer Metastasis Signaling	2.81	0.117	-3	PRKAR2A	protein kinase cAMP-dependent type II regulatory subunit alpha	Cytoplasm	kinase	1.6572e-09	2.35652e-11	up	1.61798	1.61798	0.694197
Colorectal Cancer Metastasis Signaling	2.81	0.117	-3	VEGFC	vascular endothelial growth factor C	Extracellular Space	growth factor	3.58259e-08	1.19581e-09	down	1.61553	-1.61553	-0.692007
Colorectal Cancer Metastasis Signaling	2.81	0.117	-3	BIRC5	baculoviral IAP repeat containing 5	Cytoplasm	other	6.90676e-10	7.25696e-12	up	1.63301	1.63301	0.70753
Colorectal Cancer Metastasis Signaling	2.81	0.117	-3	TLR2	toll like receptor 2	Plasma Membrane	transmembrane receptor	2.40512e-07	1.28923e-08	down	1.89028	-1.89028	-0.918603
Colorectal Cancer Metastasis Signaling	2.81	0.117	-3	PIK3R3	phosphoinositide-3-kinase regulatory subunit 3	Cytoplasm	kinase	8.33611e-08	3.4717e-09	down	1.6323	-1.6323	-0.706907
Colorectal Cancer Metastasis Signaling	2.81	0.117	-3	PRKAR2B	protein kinase cAMP-dependent type II regulatory subunit beta	Cytoplasm	kinase	1.11727e-05	1.29359e-06	up	1.57564	1.57564	0.655937
Colorectal Cancer Metastasis Signaling	2.81	0.117	-3	PTGS2	prostaglandin-endoperoxide synthase 2	Cytoplasm	enzyme	7.99585e-06	8.7125e-07	down	1.80716	-1.80716	-0.853727
Colorectal Cancer Metastasis Signaling	2.81	0.117	-3	FNBP1	formin binding protein 1	Nucleus	enzyme	1.3572e-06	1.05504e-07	up	1.82302	1.82302	0.866333
Colorectal Cancer Metastasis Signaling	2.81	0.117	-3	WNT5A	Wnt family member 5A	Extracellular Space	cytokine	1.19558e-06	9.04282e-08	down	1.68529	-1.68529	-0.752993
ErbB Signaling	2.8	0.153	NaN	PIK3C2A	phosphatidylinositol-4-phosphate 3-kinase catalytic subunit type 2 alpha	Cytoplasm	kinase	2.82584e-06	2.52843e-07	down	1.59286	-1.59286	-0.671617
ErbB Signaling	2.8	0.153	NaN	FGFR1	fibroblast growth factor receptor 1	Plasma Membrane	kinase	0.000247191	4.8071e-05	up	1.50868	1.50868	0.59329
ErbB Signaling	2.8	0.153	NaN	PDPK1	3-phosphoinositide dependent protein kinase 1	Cytoplasm	kinase	1.1086e-07	4.99204e-09	up	1.65403	1.65403	0.725987
ErbB Signaling	2.8	0.153	NaN	ERBB3	erb-b2 receptor tyrosine kinase 3	Plasma Membrane	kinase	3.01109e-07	1.69449e-08	up	1.67148	1.67148	0.741127
ErbB Signaling	2.8	0.153	NaN	PIK3R3	phosphoinositide-3-kinase regulatory subunit 3	Cytoplasm	kinase	8.33611e-08	3.4717e-09	down	1.6323	-1.6323	-0.706907
ErbB Signaling	2.8	0.153	NaN	NRG1	neuregulin 1	Plasma Membrane	growth factor	3.52503e-10	2.84582e-12	down	1.97673	-1.97673	-0.983117
ErbB Signaling	2.8	0.153	NaN	MTOR	mechanistic target of rapamycin	Nucleus	kinase	2.15174e-08	6.28984e-10	up	1.65752	1.65752	0.729023
ErbB Signaling	2.8	0.153	NaN	FOXO1	forkhead box O1	Nucleus	transcription regulator	1.76954e-08	4.93401e-10	down	1.83353	-1.83353	-0.87462
ErbB Signaling	2.8	0.153	NaN	CDC42	cell division cycle 42	Cytoplasm	enzyme	7.68247e-08	3.11153e-09	up	1.53845	1.53845	0.621477
ErbB Signaling	2.8	0.153	NaN	MAPK3	mitogen-activated protein kinase 3	Cytoplasm	kinase	4.35448e-07	2.63697e-08	down	1.70674	-1.70674	-0.77124
ErbB Signaling	2.8	0.153	NaN	TGFA	transforming growth factor alpha	Extracellular Space	growth factor	2.67995e-08	8.35203e-10	up	1.97187	1.97187	0.979563
ErbB Signaling	2.8	0.153	NaN	PRKCE	protein kinase C epsilon	Cytoplasm	kinase	5.22833e-10	4.84166e-12	down	2.01678	-2.01678	-1.01205
ErbB Signaling	2.8	0.153	NaN	GSK3B	glycogen synthase kinase 3 beta	Nucleus	kinase	2.55367e-07	1.38835e-08	up	1.64288	1.64288	0.71623
ErbB Signaling	2.8	0.153	NaN	EREG	epiregulin	Extracellular Space	growth factor	1.77171e-09	2.60092e-11	up	1.6041	1.6041	0.681767
ErbB Signaling	2.8	0.153	NaN	EGFR	epidermal growth factor receptor	Plasma Membrane	kinase	7.80544e-08	3.18516e-09	down	1.65723	-1.65723	-0.728773
FAK Signaling	2.76	0.152	NaN	ARHGAP26	Rho GTPase activating protein 26	Cytoplasm	other	1.88743e-07	9.57473e-09	up	1.83025	1.83025	0.872043
FAK Signaling	2.76	0.152	NaN	PIK3C2A	phosphatidylinositol-4-phosphate 3-kinase catalytic subunit type 2 alpha	Cytoplasm	kinase	2.82584e-06	2.52843e-07	down	1.59286	-1.59286	-0.671617
FAK Signaling	2.76	0.152	NaN	ASAP1	ArfGAP with SH3 domain, ankyrin repeat and PH domain 1	Plasma Membrane	other	1.65216e-09	2.32858e-11	up	1.83002	1.83002	0.871863
FAK Signaling	2.76	0.152	NaN	FGFR1	fibroblast growth factor receptor 1	Plasma Membrane	kinase	0.000247191	4.8071e-05	up	1.50868	1.50868	0.59329
FAK Signaling	2.76	0.152	NaN	HMMR	hyaluronan mediated motility receptor	Plasma Membrane	transmembrane receptor	8.18635e-09	1.84941e-10	down	1.57607	-1.57607	-0.65633
FAK Signaling	2.76	0.152	NaN	ITGA2	integrin subunit alpha 2	Plasma Membrane	transmembrane receptor	1.38403e-07	6.53158e-09	up	1.86016	1.86016	0.895423
FAK Signaling	2.76	0.152	NaN	ITGA5	integrin subunit alpha 5	Plasma Membrane	transmembrane receptor	2.35836e-10	1.66796e-12	down	2.56143	-2.56143	-1.35695
FAK Signaling	2.76	0.152	NaN	PDPK1	3-phosphoinositide dependent protein kinase 1	Cytoplasm	kinase	1.1086e-07	4.99204e-09	up	1.65403	1.65403	0.725987
FAK Signaling	2.76	0.152	NaN	CRK	CRK proto-oncogene, adaptor protein	Cytoplasm	other	2.44547e-11	7.27911e-14	down	1.87964	-1.87964	-0.91046
FAK Signaling	2.76	0.152	NaN	PTEN	phosphatase and tensin homolog	Cytoplasm	phosphatase	4.30522e-08	1.52354e-09	down	2.05755	-2.05755	-1.04093
FAK Signaling	2.76	0.152	NaN	PIK3R3	phosphoinositide-3-kinase regulatory subunit 3	Cytoplasm	kinase	8.33611e-08	3.4717e-09	down	1.6323	-1.6323	-0.706907
FAK Signaling	2.76	0.152	NaN	MAPK3	mitogen-activated protein kinase 3	Cytoplasm	kinase	4.35448e-07	2.63697e-08	down	1.70674	-1.70674	-0.77124
FAK Signaling	2.76	0.152	NaN	AKT3	AKT serine/threonine kinase 3	Cytoplasm	kinase	6.87797e-06	7.27745e-07	down	1.6577	-1.6577	-0.72918
FAK Signaling	2.76	0.152	NaN	VCL	vinculin	Plasma Membrane	enzyme	7.70988e-11	3.72676e-13	down	1.50646	-1.50646	-0.591167
FAK Signaling	2.76	0.152	NaN	EGFR	epidermal growth factor receptor	Plasma Membrane	kinase	7.80544e-08	3.18516e-09	down	1.65723	-1.65723	-0.728773
Cyclins and Cell Cycle Regulation	2.74	0.162	-2.121	HDAC9	histone deacetylase 9	Nucleus	transcription regulator	5.91691e-05	9.14022e-06	up	1.76391	1.76391	0.818777
Cyclins and Cell Cycle Regulation	2.74	0.162	-2.121	CCNE2	cyclin E2	Nucleus	other	2.45101e-09	4.01569e-11	down	1.80926	-1.80926	-0.855403
Cyclins and Cell Cycle Regulation	2.74	0.162	-2.121	HDAC4	histone deacetylase 4	Nucleus	transcription regulator	3.86368e-06	3.6767e-07	down	1.71516	-1.71516	-0.778347
Cyclins and Cell Cycle Regulation	2.74	0.162	-2.121	CCND2	cyclin D2	Nucleus	other	1.86059e-07	9.41018e-09	down	2.07703	-2.07703	-1.05452
Cyclins and Cell Cycle Regulation	2.74	0.162	-2.121	HDAC8	histone deacetylase 8	Nucleus	transcription regulator	7.9917e-07	5.57286e-08	down	1.8522	-1.8522	-0.889243
Cyclins and Cell Cycle Regulation	2.74	0.162	-2.121	HDAC11	histone deacetylase 11	Nucleus	transcription regulator	2.48377e-07	1.3396e-08	up	1.67911	1.67911	0.7477
Cyclins and Cell Cycle Regulation	2.74	0.162	-2.121	CDK6	cyclin dependent kinase 6	Nucleus	kinase	1.75382e-10	1.12439e-12	down	1.96768	-1.96768	-0.976497
Cyclins and Cell Cycle Regulation	2.74	0.162	-2.121	GSK3B	glycogen synthase kinase 3 beta	Nucleus	kinase	2.55367e-07	1.38835e-08	up	1.64288	1.64288	0.71623
Cyclins and Cell Cycle Regulation	2.74	0.162	-2.121	PPP2R1B	protein phosphatase 2 scaffold subunit Abeta	Plasma Membrane	phosphatase	1.07505e-10	5.86427e-13	down	3.55737	-3.55737	-1.83081
Cyclins and Cell Cycle Regulation	2.74	0.162	-2.121	CCND1	cyclin D1	Nucleus	transcription regulator	6.00024e-10	5.95338e-12	down	2.30478	-2.30478	-1.20463
Cyclins and Cell Cycle Regulation	2.74	0.162	-2.121	PPP2R5A	protein phosphatase 2 regulatory subunit B'alpha	Cytoplasm	phosphatase	4.36257e-10	3.81011e-12	up	1.99923	1.99923	0.999443
Cyclins and Cell Cycle Regulation	2.74	0.162	-2.121	SKP2	S-phase kinase associated protein 2	Nucleus	enzyme	5.42465e-07	3.47364e-08	down	1.88081	-1.88081	-0.911357
Cyclins and Cell Cycle Regulation	2.74	0.162	-2.121	CDC25A	cell division cycle 25A	Nucleus	phosphatase	2.09251e-08	6.0688e-10	down	1.72289	-1.72289	-0.784827
Pancreatic Adenocarcinoma Signaling	2.72	0.142	-2.5	SMAD2	SMAD family member 2	Nucleus	transcription regulator	1.4095e-06	1.10481e-07	up	1.52286	1.52286	0.606787
Pancreatic Adenocarcinoma Signaling	2.72	0.142	-2.5	NAPEPLD	N-acyl phosphatidylethanolamine phospholipase D	Cytoplasm	enzyme	4.04913e-07	2.41565e-08	down	1.70998	-1.70998	-0.773983
Pancreatic Adenocarcinoma Signaling	2.72	0.142	-2.5	JAK1	Janus kinase 1	Cytoplasm	kinase	1.06066e-06	7.81996e-08	down	1.54581	-1.54581	-0.62836
Pancreatic Adenocarcinoma Signaling	2.72	0.142	-2.5	PIK3C2A	phosphatidylinositol-4-phosphate 3-kinase catalytic subunit type 2 alpha	Cytoplasm	kinase	2.82584e-06	2.52843e-07	down	1.59286	-1.59286	-0.671617
Pancreatic Adenocarcinoma Signaling	2.72	0.142	-2.5	BAD	BCL2 associated agonist of cell death	Cytoplasm	other	1.34915e-08	3.45293e-10	up	1.5081	1.5081	0.59273
Pancreatic Adenocarcinoma Signaling	2.72	0.142	-2.5	FGFR1	fibroblast growth factor receptor 1	Plasma Membrane	kinase	0.000247191	4.8071e-05	up	1.50868	1.50868	0.59329
Pancreatic Adenocarcinoma Signaling	2.72	0.142	-2.5	VEGFC	vascular endothelial growth factor C	Extracellular Space	growth factor	3.58259e-08	1.19581e-09	down	1.61553	-1.61553	-0.692007
Pancreatic Adenocarcinoma Signaling	2.72	0.142	-2.5	CCND1	cyclin D1	Nucleus	transcription regulator	6.00024e-10	5.95338e-12	down	2.30478	-2.30478	-1.20463
Pancreatic Adenocarcinoma Signaling	2.72	0.142	-2.5	RALBP1	ralA binding protein 1	Cytoplasm	enzyme	5.13958e-09	1.00681e-10	down	1.55739	-1.55739	-0.639133
Pancreatic Adenocarcinoma Signaling	2.72	0.142	-2.5	BIRC5	baculoviral IAP repeat containing 5	Cytoplasm	other	6.90676e-10	7.25696e-12	up	1.63301	1.63301	0.70753
Pancreatic Adenocarcinoma Signaling	2.72	0.142	-2.5	PIK3R3	phosphoinositide-3-kinase regulatory subunit 3	Cytoplasm	kinase	8.33611e-08	3.4717e-09	down	1.6323	-1.6323	-0.706907
Pancreatic Adenocarcinoma Signaling	2.72	0.142	-2.5	CDC42	cell division cycle 42	Cytoplasm	enzyme	7.68247e-08	3.11153e-09	up	1.53845	1.53845	0.621477
Pancreatic Adenocarcinoma Signaling	2.72	0.142	-2.5	MAPK3	mitogen-activated protein kinase 3	Cytoplasm	kinase	4.35448e-07	2.63697e-08	down	1.70674	-1.70674	-0.77124
Pancreatic Adenocarcinoma Signaling	2.72	0.142	-2.5	TGFA	transforming growth factor alpha	Extracellular Space	growth factor	2.67995e-08	8.35203e-10	up	1.97187	1.97187	0.979563
Pancreatic Adenocarcinoma Signaling	2.72	0.142	-2.5	AKT3	AKT serine/threonine kinase 3	Cytoplasm	kinase	6.87797e-06	7.27745e-07	down	1.6577	-1.6577	-0.72918
Pancreatic Adenocarcinoma Signaling	2.72	0.142	-2.5	PTGS2	prostaglandin-endoperoxide synthase 2	Cytoplasm	enzyme	7.99585e-06	8.7125e-07	down	1.80716	-1.80716	-0.853727
Pancreatic Adenocarcinoma Signaling	2.72	0.142	-2.5	EGFR	epidermal growth factor receptor	Plasma Membrane	kinase	7.80544e-08	3.18516e-09	down	1.65723	-1.65723	-0.728773
Macropinocytosis Signaling	2.69	0.16	-1.414	PIK3C2A	phosphatidylinositol-4-phosphate 3-kinase catalytic subunit type 2 alpha	Cytoplasm	kinase	2.82584e-06	2.52843e-07	down	1.59286	-1.59286	-0.671617
Macropinocytosis Signaling	2.69	0.16	-1.414	FGFR1	fibroblast growth factor receptor 1	Plasma Membrane	kinase	0.000247191	4.8071e-05	up	1.50868	1.50868	0.59329
Macropinocytosis Signaling	2.69	0.16	-1.414	ANKFY1	ankyrin repeat and FYVE domain containing 1	Cytoplasm	transcription regulator	2.37143e-08	7.1432e-10	down	1.67365	-1.67365	-0.742997
Macropinocytosis Signaling	2.69	0.16	-1.414	USP6NL	USP6 N-terminal like	Plasma Membrane	other	4.02738e-05	5.8361e-06	down	1.52827	-1.52827	-0.611897
Macropinocytosis Signaling	2.69	0.16	-1.414	ITGA5	integrin subunit alpha 5	Plasma Membrane	transmembrane receptor	2.35836e-10	1.66796e-12	down	2.56143	-2.56143	-1.35695
Macropinocytosis Signaling	2.69	0.16	-1.414	NGF	nerve growth factor	Extracellular Space	growth factor	3.4574e-09	6.13073e-11	down	2.06288	-2.06288	-1.04466
Macropinocytosis Signaling	2.69	0.16	-1.414	PDGFB	platelet derived growth factor subunit B	Extracellular Space	growth factor	7.58112e-09	1.67989e-10	down	1.56623	-1.56623	-0.647293
Macropinocytosis Signaling	2.69	0.16	-1.414	ITGB3	integrin subunit beta 3	Plasma Membrane	transmembrane receptor	2.10739e-06	1.77301e-07	down	1.98681	-1.98681	-0.990453
Macropinocytosis Signaling	2.69	0.16	-1.414	PIK3R3	phosphoinositide-3-kinase regulatory subunit 3	Cytoplasm	kinase	8.33611e-08	3.4717e-09	down	1.6323	-1.6323	-0.706907
Macropinocytosis Signaling	2.69	0.16	-1.414	MET	MET proto-oncogene, receptor tyrosine kinase	Plasma Membrane	kinase	1.12073e-05	1.2993e-06	down	1.5292	-1.5292	-0.61278
Macropinocytosis Signaling	2.69	0.16	-1.414	RAB5A	RAB5A, member RAS oncogene family	Cytoplasm	enzyme	2.16443e-13	2.20259e-17	up	3.40568	3.40568	1.76794
Macropinocytosis Signaling	2.69	0.16	-1.414	CDC42	cell division cycle 42	Cytoplasm	enzyme	7.68247e-08	3.11153e-09	up	1.53845	1.53845	0.621477
Macropinocytosis Signaling	2.69	0.16	-1.414	PRKCE	protein kinase C epsilon	Cytoplasm	kinase	5.22833e-10	4.84166e-12	down	2.01678	-2.01678	-1.01205
IL-7 Signaling Pathway	2.67	0.154	-2.111	JAK1	Janus kinase 1	Cytoplasm	kinase	1.06066e-06	7.81996e-08	down	1.54581	-1.54581	-0.62836
IL-7 Signaling Pathway	2.67	0.154	-2.111	PIK3C2A	phosphatidylinositol-4-phosphate 3-kinase catalytic subunit type 2 alpha	Cytoplasm	kinase	2.82584e-06	2.52843e-07	down	1.59286	-1.59286	-0.671617
IL-7 Signaling Pathway	2.67	0.154	-2.111	BAD	BCL2 associated agonist of cell death	Cytoplasm	other	1.34915e-08	3.45293e-10	up	1.5081	1.5081	0.59273
IL-7 Signaling Pathway	2.67	0.154	-2.111	FGFR1	fibroblast growth factor receptor 1	Plasma Membrane	kinase	0.000247191	4.8071e-05	up	1.50868	1.50868	0.59329
IL-7 Signaling Pathway	2.67	0.154	-2.111	PDPK1	3-phosphoinositide dependent protein kinase 1	Cytoplasm	kinase	1.1086e-07	4.99204e-09	up	1.65403	1.65403	0.725987
IL-7 Signaling Pathway	2.67	0.154	-2.111	CCND1	cyclin D1	Nucleus	transcription regulator	6.00024e-10	5.95338e-12	down	2.30478	-2.30478	-1.20463
IL-7 Signaling Pathway	2.67	0.154	-2.111	PIK3R3	phosphoinositide-3-kinase regulatory subunit 3	Cytoplasm	kinase	8.33611e-08	3.4717e-09	down	1.6323	-1.6323	-0.706907
IL-7 Signaling Pathway	2.67	0.154	-2.111	MET	MET proto-oncogene, receptor tyrosine kinase	Plasma Membrane	kinase	1.12073e-05	1.2993e-06	down	1.5292	-1.5292	-0.61278
IL-7 Signaling Pathway	2.67	0.154	-2.111	FOXO1	forkhead box O1	Nucleus	transcription regulator	1.76954e-08	4.93401e-10	down	1.83353	-1.83353	-0.87462
IL-7 Signaling Pathway	2.67	0.154	-2.111	MAPK3	mitogen-activated protein kinase 3	Cytoplasm	kinase	4.35448e-07	2.63697e-08	down	1.70674	-1.70674	-0.77124
IL-7 Signaling Pathway	2.67	0.154	-2.111	FOXO3	forkhead box O3	Nucleus	transcription regulator	6.36945e-09	1.34477e-10	down	1.57783	-1.57783	-0.657943
IL-7 Signaling Pathway	2.67	0.154	-2.111	AKT3	AKT serine/threonine kinase 3	Cytoplasm	kinase	6.87797e-06	7.27745e-07	down	1.6577	-1.6577	-0.72918
IL-7 Signaling Pathway	2.67	0.154	-2.111	GSK3B	glycogen synthase kinase 3 beta	Nucleus	kinase	2.55367e-07	1.38835e-08	up	1.64288	1.64288	0.71623
IL-7 Signaling Pathway	2.67	0.154	-2.111	CDC25A	cell division cycle 25A	Nucleus	phosphatase	2.09251e-08	6.0688e-10	down	1.72289	-1.72289	-0.784827
Telomerase Signaling	2.67	0.144	-1.155	ETS1	ETS proto-oncogene 1, transcription factor	Nucleus	transcription regulator	7.6565e-11	3.63023e-13	down	1.5292	-1.5292	-0.612773
Telomerase Signaling	2.67	0.144	-1.155	HDAC9	histone deacetylase 9	Nucleus	transcription regulator	5.91691e-05	9.14022e-06	up	1.76391	1.76391	0.818777
Telomerase Signaling	2.67	0.144	-1.155	HDAC4	histone deacetylase 4	Nucleus	transcription regulator	3.86368e-06	3.6767e-07	down	1.71516	-1.71516	-0.778347
Telomerase Signaling	2.67	0.144	-1.155	PIK3C2A	phosphatidylinositol-4-phosphate 3-kinase catalytic subunit type 2 alpha	Cytoplasm	kinase	2.82584e-06	2.52843e-07	down	1.59286	-1.59286	-0.671617
Telomerase Signaling	2.67	0.144	-1.155	HDAC8	histone deacetylase 8	Nucleus	transcription regulator	7.9917e-07	5.57286e-08	down	1.8522	-1.8522	-0.889243
Telomerase Signaling	2.67	0.144	-1.155	FGFR1	fibroblast growth factor receptor 1	Plasma Membrane	kinase	0.000247191	4.8071e-05	up	1.50868	1.50868	0.59329
Telomerase Signaling	2.67	0.144	-1.155	PDPK1	3-phosphoinositide dependent protein kinase 1	Cytoplasm	kinase	1.1086e-07	4.99204e-09	up	1.65403	1.65403	0.725987
Telomerase Signaling	2.67	0.144	-1.155	PPP2R5A	protein phosphatase 2 regulatory subunit B'alpha	Cytoplasm	phosphatase	4.36257e-10	3.81011e-12	up	1.99923	1.99923	0.999443
Telomerase Signaling	2.67	0.144	-1.155	PIK3R3	phosphoinositide-3-kinase regulatory subunit 3	Cytoplasm	kinase	8.33611e-08	3.4717e-09	down	1.6323	-1.6323	-0.706907
Telomerase Signaling	2.67	0.144	-1.155	ELF3	E74 like ETS transcription factor 3	Nucleus	transcription regulator	7.09466e-09	1.54559e-10	down	1.65089	-1.65089	-0.723243
Telomerase Signaling	2.67	0.144	-1.155	MAPK3	mitogen-activated protein kinase 3	Cytoplasm	kinase	4.35448e-07	2.63697e-08	down	1.70674	-1.70674	-0.77124
Telomerase Signaling	2.67	0.144	-1.155	HDAC11	histone deacetylase 11	Nucleus	transcription regulator	2.48377e-07	1.3396e-08	up	1.67911	1.67911	0.7477
Telomerase Signaling	2.67	0.144	-1.155	HSP90AA1	heat shock protein 90 alpha family class A member 1	Cytoplasm	enzyme	7.40107e-10	7.894e-12	up	1.62731	1.62731	0.70249
Telomerase Signaling	2.67	0.144	-1.155	AKT3	AKT serine/threonine kinase 3	Cytoplasm	kinase	6.87797e-06	7.27745e-07	down	1.6577	-1.6577	-0.72918
Telomerase Signaling	2.67	0.144	-1.155	PPP2R1B	protein phosphatase 2 scaffold subunit Abeta	Plasma Membrane	phosphatase	1.07505e-10	5.86427e-13	down	3.55737	-3.55737	-1.83081
Telomerase Signaling	2.67	0.144	-1.155	EGFR	epidermal growth factor receptor	Plasma Membrane	kinase	7.80544e-08	3.18516e-09	down	1.65723	-1.65723	-0.728773
Ovarian Cancer Signaling	2.61	0.132	NaN	PRKACB	protein kinase cAMP-activated catalytic subunit beta	Cytoplasm	kinase	3.85749e-08	1.31897e-09	down	2.07728	-2.07728	-1.0547
Ovarian Cancer Signaling	2.61	0.132	NaN	WNT3	Wnt family member 3	Extracellular Space	other	1.4617e-05	1.78124e-06	down	1.50754	-1.50754	-0.5922
Ovarian Cancer Signaling	2.61	0.132	NaN	PIK3C2A	phosphatidylinositol-4-phosphate 3-kinase catalytic subunit type 2 alpha	Cytoplasm	kinase	2.82584e-06	2.52843e-07	down	1.59286	-1.59286	-0.671617
Ovarian Cancer Signaling	2.61	0.132	NaN	FGFR1	fibroblast growth factor receptor 1	Plasma Membrane	kinase	0.000247191	4.8071e-05	up	1.50868	1.50868	0.59329
Ovarian Cancer Signaling	2.61	0.132	NaN	PRKAR2A	protein kinase cAMP-dependent type II regulatory subunit alpha	Cytoplasm	kinase	1.6572e-09	2.35652e-11	up	1.61798	1.61798	0.694197
Ovarian Cancer Signaling	2.61	0.132	NaN	VEGFC	vascular endothelial growth factor C	Extracellular Space	growth factor	3.58259e-08	1.19581e-09	down	1.61553	-1.61553	-0.692007
Ovarian Cancer Signaling	2.61	0.132	NaN	CCND1	cyclin D1	Nucleus	transcription regulator	6.00024e-10	5.95338e-12	down	2.30478	-2.30478	-1.20463
Ovarian Cancer Signaling	2.61	0.132	NaN	PTEN	phosphatase and tensin homolog	Cytoplasm	phosphatase	4.30522e-08	1.52354e-09	down	2.05755	-2.05755	-1.04093
Ovarian Cancer Signaling	2.61	0.132	NaN	PIK3R3	phosphoinositide-3-kinase regulatory subunit 3	Cytoplasm	kinase	8.33611e-08	3.4717e-09	down	1.6323	-1.6323	-0.706907
Ovarian Cancer Signaling	2.61	0.132	NaN	MTOR	mechanistic target of rapamycin	Nucleus	kinase	2.15174e-08	6.28984e-10	up	1.65752	1.65752	0.729023
Ovarian Cancer Signaling	2.61	0.132	NaN	PRKAR2B	protein kinase cAMP-dependent type II regulatory subunit beta	Cytoplasm	kinase	1.11727e-05	1.29359e-06	up	1.57564	1.57564	0.655937
Ovarian Cancer Signaling	2.61	0.132	NaN	EDN1	endothelin 1	Extracellular Space	cytokine	2.19861e-07	1.1584e-08	up	1.88989	1.88989	0.918303
Ovarian Cancer Signaling	2.61	0.132	NaN	MAPK3	mitogen-activated protein kinase 3	Cytoplasm	kinase	4.35448e-07	2.63697e-08	down	1.70674	-1.70674	-0.77124
Ovarian Cancer Signaling	2.61	0.132	NaN	AKT3	AKT serine/threonine kinase 3	Cytoplasm	kinase	6.87797e-06	7.27745e-07	down	1.6577	-1.6577	-0.72918
Ovarian Cancer Signaling	2.61	0.132	NaN	PTGS2	prostaglandin-endoperoxide synthase 2	Cytoplasm	enzyme	7.99585e-06	8.7125e-07	down	1.80716	-1.80716	-0.853727
Ovarian Cancer Signaling	2.61	0.132	NaN	GSK3B	glycogen synthase kinase 3 beta	Nucleus	kinase	2.55367e-07	1.38835e-08	up	1.64288	1.64288	0.71623
Ovarian Cancer Signaling	2.61	0.132	NaN	BRCA1	BRCA1, DNA repair associated	Nucleus	transcription regulator	2.40849e-06	2.07963e-07	down	1.52917	-1.52917	-0.612753
Ovarian Cancer Signaling	2.61	0.132	NaN	EGFR	epidermal growth factor receptor	Plasma Membrane	kinase	7.80544e-08	3.18516e-09	down	1.65723	-1.65723	-0.728773
Ovarian Cancer Signaling	2.61	0.132	NaN	WNT5A	Wnt family member 5A	Extracellular Space	cytokine	1.19558e-06	9.04282e-08	down	1.68529	-1.68529	-0.752993
Endometrial Cancer Signaling	2.6	0.172	NaN	PIK3R3	phosphoinositide-3-kinase regulatory subunit 3	Cytoplasm	kinase	8.33611e-08	3.4717e-09	down	1.6323	-1.6323	-0.706907
Endometrial Cancer Signaling	2.6	0.172	NaN	BAD	BCL2 associated agonist of cell death	Cytoplasm	other	1.34915e-08	3.45293e-10	up	1.5081	1.5081	0.59273
Endometrial Cancer Signaling	2.6	0.172	NaN	PIK3C2A	phosphatidylinositol-4-phosphate 3-kinase catalytic subunit type 2 alpha	Cytoplasm	kinase	2.82584e-06	2.52843e-07	down	1.59286	-1.59286	-0.671617
Endometrial Cancer Signaling	2.6	0.172	NaN	MAPK3	mitogen-activated protein kinase 3	Cytoplasm	kinase	4.35448e-07	2.63697e-08	down	1.70674	-1.70674	-0.77124
Endometrial Cancer Signaling	2.6	0.172	NaN	FGFR1	fibroblast growth factor receptor 1	Plasma Membrane	kinase	0.000247191	4.8071e-05	up	1.50868	1.50868	0.59329
Endometrial Cancer Signaling	2.6	0.172	NaN	FOXO3	forkhead box O3	Nucleus	transcription regulator	6.36945e-09	1.34477e-10	down	1.57783	-1.57783	-0.657943
Endometrial Cancer Signaling	2.6	0.172	NaN	AKT3	AKT serine/threonine kinase 3	Cytoplasm	kinase	6.87797e-06	7.27745e-07	down	1.6577	-1.6577	-0.72918
Endometrial Cancer Signaling	2.6	0.172	NaN	PDPK1	3-phosphoinositide dependent protein kinase 1	Cytoplasm	kinase	1.1086e-07	4.99204e-09	up	1.65403	1.65403	0.725987
Endometrial Cancer Signaling	2.6	0.172	NaN	GSK3B	glycogen synthase kinase 3 beta	Nucleus	kinase	2.55367e-07	1.38835e-08	up	1.64288	1.64288	0.71623
Endometrial Cancer Signaling	2.6	0.172	NaN	CCND1	cyclin D1	Nucleus	transcription regulator	6.00024e-10	5.95338e-12	down	2.30478	-2.30478	-1.20463
Endometrial Cancer Signaling	2.6	0.172	NaN	PTEN	phosphatase and tensin homolog	Cytoplasm	phosphatase	4.30522e-08	1.52354e-09	down	2.05755	-2.05755	-1.04093
Renal Cell Carcinoma Signaling	2.59	0.157	-1.897	ETS1	ETS proto-oncogene 1, transcription factor	Nucleus	transcription regulator	7.6565e-11	3.63023e-13	down	1.5292	-1.5292	-0.612773
Renal Cell Carcinoma Signaling	2.59	0.157	-1.897	PIK3C2A	phosphatidylinositol-4-phosphate 3-kinase catalytic subunit type 2 alpha	Cytoplasm	kinase	2.82584e-06	2.52843e-07	down	1.59286	-1.59286	-0.671617
Renal Cell Carcinoma Signaling	2.59	0.157	-1.897	FGFR1	fibroblast growth factor receptor 1	Plasma Membrane	kinase	0.000247191	4.8071e-05	up	1.50868	1.50868	0.59329
Renal Cell Carcinoma Signaling	2.59	0.157	-1.897	CRK	CRK proto-oncogene, adaptor protein	Cytoplasm	other	2.44547e-11	7.27911e-14	down	1.87964	-1.87964	-0.91046
Renal Cell Carcinoma Signaling	2.59	0.157	-1.897	RAP1A	RAP1A, member of RAS oncogene family	Cytoplasm	enzyme	1.35837e-14	3.45579e-19	down	2.46964	-2.46964	-1.3043
Renal Cell Carcinoma Signaling	2.59	0.157	-1.897	PDGFB	platelet derived growth factor subunit B	Extracellular Space	growth factor	7.58112e-09	1.67989e-10	down	1.56623	-1.56623	-0.647293
Renal Cell Carcinoma Signaling	2.59	0.157	-1.897	PIK3R3	phosphoinositide-3-kinase regulatory subunit 3	Cytoplasm	kinase	8.33611e-08	3.4717e-09	down	1.6323	-1.6323	-0.706907
Renal Cell Carcinoma Signaling	2.59	0.157	-1.897	MET	MET proto-oncogene, receptor tyrosine kinase	Plasma Membrane	kinase	1.12073e-05	1.2993e-06	down	1.5292	-1.5292	-0.61278
Renal Cell Carcinoma Signaling	2.59	0.157	-1.897	CDC42	cell division cycle 42	Cytoplasm	enzyme	7.68247e-08	3.11153e-09	up	1.53845	1.53845	0.621477
Renal Cell Carcinoma Signaling	2.59	0.157	-1.897	MAPK3	mitogen-activated protein kinase 3	Cytoplasm	kinase	4.35448e-07	2.63697e-08	down	1.70674	-1.70674	-0.77124
Renal Cell Carcinoma Signaling	2.59	0.157	-1.897	TGFA	transforming growth factor alpha	Extracellular Space	growth factor	2.67995e-08	8.35203e-10	up	1.97187	1.97187	0.979563
Renal Cell Carcinoma Signaling	2.59	0.157	-1.897	AKT3	AKT serine/threonine kinase 3	Cytoplasm	kinase	6.87797e-06	7.27745e-07	down	1.6577	-1.6577	-0.72918
Renal Cell Carcinoma Signaling	2.59	0.157	-1.897	VHL	von Hippel-Lindau tumor suppressor	Nucleus	transcription regulator	4.07837e-09	7.54312e-11	down	1.58979	-1.58979	-0.668833
PXR/RXR Activation	2.54	0.169	NaN	PRKACB	protein kinase cAMP-activated catalytic subunit beta	Cytoplasm	kinase	3.85749e-08	1.31897e-09	down	2.07728	-2.07728	-1.0547
PXR/RXR Activation	2.54	0.169	NaN	PRKAR2B	protein kinase cAMP-dependent type II regulatory subunit beta	Cytoplasm	kinase	1.11727e-05	1.29359e-06	up	1.57564	1.57564	0.655937
PXR/RXR Activation	2.54	0.169	NaN	FOXO1	forkhead box O1	Nucleus	transcription regulator	1.76954e-08	4.93401e-10	down	1.83353	-1.83353	-0.87462
PXR/RXR Activation	2.54	0.169	NaN	PCK2	phosphoenolpyruvate carboxykinase 2, mitochondrial	Cytoplasm	kinase	2.2713e-08	6.77225e-10	down	2.03147	-2.03147	-1.02253
PXR/RXR Activation	2.54	0.169	NaN	FOXO3	forkhead box O3	Nucleus	transcription regulator	6.36945e-09	1.34477e-10	down	1.57783	-1.57783	-0.657943
PXR/RXR Activation	2.54	0.169	NaN	PRKAR2A	protein kinase cAMP-dependent type II regulatory subunit alpha	Cytoplasm	kinase	1.6572e-09	2.35652e-11	up	1.61798	1.61798	0.694197
PXR/RXR Activation	2.54	0.169	NaN	AKT3	AKT serine/threonine kinase 3	Cytoplasm	kinase	6.87797e-06	7.27745e-07	down	1.6577	-1.6577	-0.72918
PXR/RXR Activation	2.54	0.169	NaN	CES2	carboxylesterase 2	Cytoplasm	enzyme	4.93211e-06	4.90237e-07	down	1.58748	-1.58748	-0.66674
PXR/RXR Activation	2.54	0.169	NaN	ABCC3	ATP binding cassette subfamily C member 3	Plasma Membrane	transporter	6.50229e-07	4.30596e-08	down	1.66122	-1.66122	-0.732247
PXR/RXR Activation	2.54	0.169	NaN	NR3C1	nuclear receptor subfamily 3 group C member 1	Nucleus	ligand-dependent nuclear receptor	5.79647e-07	3.75903e-08	down	1.57858	-1.57858	-0.65863
PXR/RXR Activation	2.54	0.169	NaN	PAPSS2	3'-phosphoadenosine 5'-phosphosulfate synthase 2	Cytoplasm	enzyme	3.01126e-08	9.71197e-10	down	1.63285	-1.63285	-0.707397
Mitotic Roles of Polo-Like Kinase	2.49	0.167	-1.342	CDC25C	cell division cycle 25C	Nucleus	phosphatase	1.99828e-07	1.02438e-08	down	1.53353	-1.53353	-0.616857
Mitotic Roles of Polo-Like Kinase	2.49	0.167	-1.342	PRC1	protein regulator of cytokinesis 1	Nucleus	other	2.55497e-08	7.85856e-10	up	1.63511	1.63511	0.709387
Mitotic Roles of Polo-Like Kinase	2.49	0.167	-1.342	CDC7	cell division cycle 7	Nucleus	kinase	7.05198e-07	4.78122e-08	down	1.94501	-1.94501	-0.959777
Mitotic Roles of Polo-Like Kinase	2.49	0.167	-1.342	HSP90AA1	heat shock protein 90 alpha family class A member 1	Cytoplasm	enzyme	7.40107e-10	7.894e-12	up	1.62731	1.62731	0.70249
Mitotic Roles of Polo-Like Kinase	2.49	0.167	-1.342	CDC23	cell division cycle 23	Nucleus	enzyme	6.65717e-09	1.4379e-10	down	1.56254	-1.56254	-0.643897
Mitotic Roles of Polo-Like Kinase	2.49	0.167	-1.342	PPP2R1B	protein phosphatase 2 scaffold subunit Abeta	Plasma Membrane	phosphatase	1.07505e-10	5.86427e-13	down	3.55737	-3.55737	-1.83081
Mitotic Roles of Polo-Like Kinase	2.49	0.167	-1.342	CDC27	cell division cycle 27	Nucleus	other	3.27825e-10	2.6237e-12	up	1.87923	1.87923	0.91014
Mitotic Roles of Polo-Like Kinase	2.49	0.167	-1.342	KIF11	kinesin family member 11	Nucleus	other	2.61957e-11	7.86397e-14	down	2.18552	-2.18552	-1.12797
Mitotic Roles of Polo-Like Kinase	2.49	0.167	-1.342	PPP2R5A	protein phosphatase 2 regulatory subunit B'alpha	Cytoplasm	phosphatase	4.36257e-10	3.81011e-12	up	1.99923	1.99923	0.999443
Mitotic Roles of Polo-Like Kinase	2.49	0.167	-1.342	CDC25A	cell division cycle 25A	Nucleus	phosphatase	2.09251e-08	6.0688e-10	down	1.72289	-1.72289	-0.784827
Mitotic Roles of Polo-Like Kinase	2.49	0.167	-1.342	SMC1A	structural maintenance of chromosomes 1A	Nucleus	transporter	2.79155e-12	2.05955e-15	down	3.05813	-3.05813	-1.61265
Sumoylation Pathway	2.45	0.146	1.414	SERBP1	SERPINE1 mRNA binding protein 1	Cytoplasm	other	5.1086e-09	9.94246e-11	down	1.72071	-1.72071	-0.783007
Sumoylation Pathway	2.45	0.146	1.414	ETS1	ETS proto-oncogene 1, transcription factor	Nucleus	transcription regulator	7.6565e-11	3.63023e-13	down	1.5292	-1.5292	-0.612773
Sumoylation Pathway	2.45	0.146	1.414	RAN	RAN, member RAS oncogene family	Nucleus	enzyme	1.0066e-11	1.99747e-14	up	2.10219	2.10219	1.07189
Sumoylation Pathway	2.45	0.146	1.414	RCOR1	REST corepressor 1	Nucleus	transcription regulator	2.52148e-08	7.73113e-10	down	1.59079	-1.59079	-0.669743
Sumoylation Pathway	2.45	0.146	1.414	RFC5	replication factor C subunit 5	Nucleus	enzyme	7.82776e-12	1.31435e-14	down	2.7852	-2.7852	-1.47778
Sumoylation Pathway	2.45	0.146	1.414	NR3C1	nuclear receptor subfamily 3 group C member 1	Nucleus	ligand-dependent nuclear receptor	5.79647e-07	3.75903e-08	down	1.57858	-1.57858	-0.65863
Sumoylation Pathway	2.45	0.146	1.414	SP100	SP100 nuclear antigen	Nucleus	transcription regulator	4.46198e-06	4.34086e-07	up	1.584	1.584	0.66357
Sumoylation Pathway	2.45	0.146	1.414	ARHGDIB	Rho GDP dissociation inhibitor beta	Cytoplasm	enzyme	3.65505e-09	6.5556e-11	up	2.22279	2.22279	1.15237
Sumoylation Pathway	2.45	0.146	1.414	TDG	thymine DNA glycosylase	Nucleus	enzyme	8.48734e-09	1.9282e-10	down	1.65689	-1.65689	-0.728477
Sumoylation Pathway	2.45	0.146	1.414	RCC1	regulator of chromosome condensation 1	Cytoplasm	other	1.08738e-07	4.86884e-09	up	3.54764	3.54764	1.82686
Sumoylation Pathway	2.45	0.146	1.414	SUMO2	small ubiquitin-like modifier 2	Nucleus	enzyme	1.26646e-11	2.88009e-14	down	1.7915	-1.7915	-0.841167
Sumoylation Pathway	2.45	0.146	1.414	ISG20	interferon stimulated exonuclease gene 20	Nucleus	enzyme	9.05843e-07	6.44117e-08	down	1.7735	-1.7735	-0.826597
Sumoylation Pathway	2.45	0.146	1.414	FNBP1	formin binding protein 1	Nucleus	enzyme	1.3572e-06	1.05504e-07	up	1.82302	1.82302	0.866333
Sumoylation Pathway	2.45	0.146	1.414	RFC3	replication factor C subunit 3	Nucleus	enzyme	1.72716e-08	4.78508e-10	down	1.51502	-1.51502	-0.599333
AMPK Signaling	2.45	0.116	0.5	PRKACB	protein kinase cAMP-activated catalytic subunit beta	Cytoplasm	kinase	3.85749e-08	1.31897e-09	down	2.07728	-2.07728	-1.0547
AMPK Signaling	2.45	0.116	0.5	PIK3C2A	phosphatidylinositol-4-phosphate 3-kinase catalytic subunit type 2 alpha	Cytoplasm	kinase	2.82584e-06	2.52843e-07	down	1.59286	-1.59286	-0.671617
AMPK Signaling	2.45	0.116	0.5	FGFR1	fibroblast growth factor receptor 1	Plasma Membrane	kinase	0.000247191	4.8071e-05	up	1.50868	1.50868	0.59329
AMPK Signaling	2.45	0.116	0.5	STRADA	STE20-related kinase adaptor alpha	Nucleus	kinase	3.01112e-06	2.72809e-07	down	1.57676	-1.57676	-0.656963
AMPK Signaling	2.45	0.116	0.5	SMARCE1	SWI/SNF related, matrix associated, actin dependent regulator of chromatin, subfamily e, member 1	Nucleus	transcription regulator	1.8058e-09	2.67377e-11	up	2.03758	2.03758	1.02685
AMPK Signaling	2.45	0.116	0.5	PRKAR2A	protein kinase cAMP-dependent type II regulatory subunit alpha	Cytoplasm	kinase	1.6572e-09	2.35652e-11	up	1.61798	1.61798	0.694197
AMPK Signaling	2.45	0.116	0.5	PDPK1	3-phosphoinositide dependent protein kinase 1	Cytoplasm	kinase	1.1086e-07	4.99204e-09	up	1.65403	1.65403	0.725987
AMPK Signaling	2.45	0.116	0.5	CREB5	cAMP responsive element binding protein 5	Nucleus	transcription regulator	7.24769e-06	7.75162e-07	down	1.82782	-1.82782	-0.870123
AMPK Signaling	2.45	0.116	0.5	CCND1	cyclin D1	Nucleus	transcription regulator	6.00024e-10	5.95338e-12	down	2.30478	-2.30478	-1.20463
AMPK Signaling	2.45	0.116	0.5	ELAVL1	ELAV like RNA binding protein 1	Cytoplasm	other	1.37507e-05	1.65539e-06	down	1.66689	-1.66689	-0.737157
AMPK Signaling	2.45	0.116	0.5	PPP2R5A	protein phosphatase 2 regulatory subunit B'alpha	Cytoplasm	phosphatase	4.36257e-10	3.81011e-12	up	1.99923	1.99923	0.999443
AMPK Signaling	2.45	0.116	0.5	PIK3R3	phosphoinositide-3-kinase regulatory subunit 3	Cytoplasm	kinase	8.33611e-08	3.4717e-09	down	1.6323	-1.6323	-0.706907
AMPK Signaling	2.45	0.116	0.5	MTOR	mechanistic target of rapamycin	Nucleus	kinase	2.15174e-08	6.28984e-10	up	1.65752	1.65752	0.729023
AMPK Signaling	2.45	0.116	0.5	PRKAR2B	protein kinase cAMP-dependent type II regulatory subunit beta	Cytoplasm	kinase	1.11727e-05	1.29359e-06	up	1.57564	1.57564	0.655937
AMPK Signaling	2.45	0.116	0.5	PCK2	phosphoenolpyruvate carboxykinase 2, mitochondrial	Cytoplasm	kinase	2.2713e-08	6.77225e-10	down	2.03147	-2.03147	-1.02253
AMPK Signaling	2.45	0.116	0.5	FOXO1	forkhead box O1	Nucleus	transcription regulator	1.76954e-08	4.93401e-10	down	1.83353	-1.83353	-0.87462
AMPK Signaling	2.45	0.116	0.5	SMARCA2	SWI/SNF related, matrix associated, actin dependent regulator of chromatin, subfamily a, member 2	Nucleus	transcription regulator	1.06045e-07	4.71855e-09	down	1.55412	-1.55412	-0.636097
AMPK Signaling	2.45	0.116	0.5	FOXO3	forkhead box O3	Nucleus	transcription regulator	6.36945e-09	1.34477e-10	down	1.57783	-1.57783	-0.657943
AMPK Signaling	2.45	0.116	0.5	PRKAA2	protein kinase AMP-activated catalytic subunit alpha 2	Cytoplasm	kinase	2.10783e-08	6.11859e-10	up	2.56896	2.56896	1.36119
AMPK Signaling	2.45	0.116	0.5	AKT3	AKT serine/threonine kinase 3	Cytoplasm	kinase	6.87797e-06	7.27745e-07	down	1.6577	-1.6577	-0.72918
AMPK Signaling	2.45	0.116	0.5	AK4	adenylate kinase 4	Cytoplasm	kinase	9.22241e-09	2.12336e-10	down	1.52524	-1.52524	-0.60904
AMPK Signaling	2.45	0.116	0.5	PPM1A	protein phosphatase, Mg2+/Mn2+ dependent 1A	Cytoplasm	phosphatase	1.13925e-08	2.7798e-10	down	2.76563	-2.76563	-1.46761
AMPK Signaling	2.45	0.116	0.5	SMARCC1	SWI/SNF related, matrix associated, actin dependent regulator of chromatin subfamily c member 1	Nucleus	transcription regulator	1.14545e-10	6.41563e-13	up	2.12213	2.12213	1.08551
AMPK Signaling	2.45	0.116	0.5	PPP2R1B	protein phosphatase 2 scaffold subunit Abeta	Plasma Membrane	phosphatase	1.07505e-10	5.86427e-13	down	3.55737	-3.55737	-1.83081
AMPK Signaling	2.45	0.116	0.5	PHF10	PHD finger protein 10	Nucleus	other	1.25289e-09	1.64154e-11	up	2.33051	2.33051	1.22064
Non-Small Cell Lung Cancer Signaling	2.42	0.156	-0.905	PIK3R3	phosphoinositide-3-kinase regulatory subunit 3	Cytoplasm	kinase	8.33611e-08	3.4717e-09	down	1.6323	-1.6323	-0.706907
Non-Small Cell Lung Cancer Signaling	2.42	0.156	-0.905	BAD	BCL2 associated agonist of cell death	Cytoplasm	other	1.34915e-08	3.45293e-10	up	1.5081	1.5081	0.59273
Non-Small Cell Lung Cancer Signaling	2.42	0.156	-0.905	PIK3C2A	phosphatidylinositol-4-phosphate 3-kinase catalytic subunit type 2 alpha	Cytoplasm	kinase	2.82584e-06	2.52843e-07	down	1.59286	-1.59286	-0.671617
Non-Small Cell Lung Cancer Signaling	2.42	0.156	-0.905	MAPK3	mitogen-activated protein kinase 3	Cytoplasm	kinase	4.35448e-07	2.63697e-08	down	1.70674	-1.70674	-0.77124
Non-Small Cell Lung Cancer Signaling	2.42	0.156	-0.905	FGFR1	fibroblast growth factor receptor 1	Plasma Membrane	kinase	0.000247191	4.8071e-05	up	1.50868	1.50868	0.59329
Non-Small Cell Lung Cancer Signaling	2.42	0.156	-0.905	FOXO3	forkhead box O3	Nucleus	transcription regulator	6.36945e-09	1.34477e-10	down	1.57783	-1.57783	-0.657943
Non-Small Cell Lung Cancer Signaling	2.42	0.156	-0.905	CDK6	cyclin dependent kinase 6	Nucleus	kinase	1.75382e-10	1.12439e-12	down	1.96768	-1.96768	-0.976497
Non-Small Cell Lung Cancer Signaling	2.42	0.156	-0.905	TGFA	transforming growth factor alpha	Extracellular Space	growth factor	2.67995e-08	8.35203e-10	up	1.97187	1.97187	0.979563
Non-Small Cell Lung Cancer Signaling	2.42	0.156	-0.905	AKT3	AKT serine/threonine kinase 3	Cytoplasm	kinase	6.87797e-06	7.27745e-07	down	1.6577	-1.6577	-0.72918
Non-Small Cell Lung Cancer Signaling	2.42	0.156	-0.905	PDPK1	3-phosphoinositide dependent protein kinase 1	Cytoplasm	kinase	1.1086e-07	4.99204e-09	up	1.65403	1.65403	0.725987
Non-Small Cell Lung Cancer Signaling	2.42	0.156	-0.905	CCND1	cyclin D1	Nucleus	transcription regulator	6.00024e-10	5.95338e-12	down	2.30478	-2.30478	-1.20463
Non-Small Cell Lung Cancer Signaling	2.42	0.156	-0.905	EGFR	epidermal growth factor receptor	Plasma Membrane	kinase	7.80544e-08	3.18516e-09	down	1.65723	-1.65723	-0.728773
Integrin Signaling	2.37	0.114	-1.225	ACTR2	ARP2 actin related protein 2 homolog	Plasma Membrane	other	4.47975e-11	1.56137e-13	down	2.38126	-2.38126	-1.25172
Integrin Signaling	2.37	0.114	-1.225	ARHGAP26	Rho GTPase activating protein 26	Cytoplasm	other	1.88743e-07	9.57473e-09	up	1.83025	1.83025	0.872043
Integrin Signaling	2.37	0.114	-1.225	PIK3C2A	phosphatidylinositol-4-phosphate 3-kinase catalytic subunit type 2 alpha	Cytoplasm	kinase	2.82584e-06	2.52843e-07	down	1.59286	-1.59286	-0.671617
Integrin Signaling	2.37	0.114	-1.225	ASAP1	ArfGAP with SH3 domain, ankyrin repeat and PH domain 1	Plasma Membrane	other	1.65216e-09	2.32858e-11	up	1.83002	1.83002	0.871863
Integrin Signaling	2.37	0.114	-1.225	FGFR1	fibroblast growth factor receptor 1	Plasma Membrane	kinase	0.000247191	4.8071e-05	up	1.50868	1.50868	0.59329
Integrin Signaling	2.37	0.114	-1.225	WASL	Wiskott-Aldrich syndrome like	Cytoplasm	other	9.38587e-08	4.01634e-09	up	1.60073	1.60073	0.678733
Integrin Signaling	2.37	0.114	-1.225	RALB	RAS like proto-oncogene B	Cytoplasm	enzyme	3.99931e-10	3.36778e-12	up	1.79067	1.79067	0.840503
Integrin Signaling	2.37	0.114	-1.225	ITGA2	integrin subunit alpha 2	Plasma Membrane	transmembrane receptor	1.38403e-07	6.53158e-09	up	1.86016	1.86016	0.895423
Integrin Signaling	2.37	0.114	-1.225	ITGA6	integrin subunit alpha 6	Plasma Membrane	transmembrane receptor	4.16708e-10	3.60446e-12	down	1.9976	-1.9976	-0.99827
Integrin Signaling	2.37	0.114	-1.225	ITGA5	integrin subunit alpha 5	Plasma Membrane	transmembrane receptor	2.35836e-10	1.66796e-12	down	2.56143	-2.56143	-1.35695
Integrin Signaling	2.37	0.114	-1.225	CRK	CRK proto-oncogene, adaptor protein	Cytoplasm	other	2.44547e-11	7.27911e-14	down	1.87964	-1.87964	-0.91046
Integrin Signaling	2.37	0.114	-1.225	RAP1A	RAP1A, member of RAS oncogene family	Cytoplasm	enzyme	1.35837e-14	3.45579e-19	down	2.46964	-2.46964	-1.3043
Integrin Signaling	2.37	0.114	-1.225	PDGFB	platelet derived growth factor subunit B	Extracellular Space	growth factor	7.58112e-09	1.67989e-10	down	1.56623	-1.56623	-0.647293
Integrin Signaling	2.37	0.114	-1.225	ITGB3	integrin subunit beta 3	Plasma Membrane	transmembrane receptor	2.10739e-06	1.77301e-07	down	1.98681	-1.98681	-0.990453
Integrin Signaling	2.37	0.114	-1.225	PTEN	phosphatase and tensin homolog	Cytoplasm	phosphatase	4.30522e-08	1.52354e-09	down	2.05755	-2.05755	-1.04093
Integrin Signaling	2.37	0.114	-1.225	ARHGAP5	Rho GTPase activating protein 5	Cytoplasm	enzyme	8.12764e-09	1.82994e-10	down	1.66015	-1.66015	-0.73131
Integrin Signaling	2.37	0.114	-1.225	PIK3R3	phosphoinositide-3-kinase regulatory subunit 3	Cytoplasm	kinase	8.33611e-08	3.4717e-09	down	1.6323	-1.6323	-0.706907
Integrin Signaling	2.37	0.114	-1.225	ARF3	ADP ribosylation factor 3	Cytoplasm	enzyme	5.18346e-11	2.0068e-13	down	2.28209	-2.28209	-1.19036
Integrin Signaling	2.37	0.114	-1.225	CDC42	cell division cycle 42	Cytoplasm	enzyme	7.68247e-08	3.11153e-09	up	1.53845	1.53845	0.621477
Integrin Signaling	2.37	0.114	-1.225	MAPK3	mitogen-activated protein kinase 3	Cytoplasm	kinase	4.35448e-07	2.63697e-08	down	1.70674	-1.70674	-0.77124
Integrin Signaling	2.37	0.114	-1.225	AKT3	AKT serine/threonine kinase 3	Cytoplasm	kinase	6.87797e-06	7.27745e-07	down	1.6577	-1.6577	-0.72918
Integrin Signaling	2.37	0.114	-1.225	GSK3B	glycogen synthase kinase 3 beta	Nucleus	kinase	2.55367e-07	1.38835e-08	up	1.64288	1.64288	0.71623
Integrin Signaling	2.37	0.114	-1.225	VCL	vinculin	Plasma Membrane	enzyme	7.70988e-11	3.72676e-13	down	1.50646	-1.50646	-0.591167
Integrin Signaling	2.37	0.114	-1.225	TSPAN6	tetraspanin 6	Plasma Membrane	other	3.42711e-07	1.98441e-08	up	1.5318	1.5318	0.61523
Integrin Signaling	2.37	0.114	-1.225	FNBP1	formin binding protein 1	Nucleus	enzyme	1.3572e-06	1.05504e-07	up	1.82302	1.82302	0.866333
Clathrin-mediated Endocytosis Signaling	2.29	0.116	NaN	MYO6	myosin VI	Cytoplasm	other	3.89541e-07	2.30809e-08	down	1.58307	-1.58307	-0.662723
Clathrin-mediated Endocytosis Signaling	2.29	0.116	NaN	ACTR2	ARP2 actin related protein 2 homolog	Plasma Membrane	other	4.47975e-11	1.56137e-13	down	2.38126	-2.38126	-1.25172
Clathrin-mediated Endocytosis Signaling	2.29	0.116	NaN	SH3BP4	SH3 domain binding protein 4	Cytoplasm	other	3.11928e-07	1.77204e-08	down	1.8861	-1.8861	-0.915403
Clathrin-mediated Endocytosis Signaling	2.29	0.116	NaN	EPN1	epsin 1	Plasma Membrane	other	9.85677e-12	1.88073e-14	up	1.92777	1.92777	0.94693
Clathrin-mediated Endocytosis Signaling	2.29	0.116	NaN	PIK3C2A	phosphatidylinositol-4-phosphate 3-kinase catalytic subunit type 2 alpha	Cytoplasm	kinase	2.82584e-06	2.52843e-07	down	1.59286	-1.59286	-0.671617
Clathrin-mediated Endocytosis Signaling	2.29	0.116	NaN	PICALM	phosphatidylinositol binding clathrin assembly protein	Cytoplasm	other	1.90866e-09	2.90526e-11	up	2.09448	2.09448	1.06659
Clathrin-mediated Endocytosis Signaling	2.29	0.116	NaN	FGFR1	fibroblast growth factor receptor 1	Plasma Membrane	kinase	0.000247191	4.8071e-05	up	1.50868	1.50868	0.59329
Clathrin-mediated Endocytosis Signaling	2.29	0.116	NaN	WASL	Wiskott-Aldrich syndrome like	Cytoplasm	other	9.38587e-08	4.01634e-09	up	1.60073	1.60073	0.678733
Clathrin-mediated Endocytosis Signaling	2.29	0.116	NaN	VEGFC	vascular endothelial growth factor C	Extracellular Space	growth factor	3.58259e-08	1.19581e-09	down	1.61553	-1.61553	-0.692007
Clathrin-mediated Endocytosis Signaling	2.29	0.116	NaN	ITGA5	integrin subunit alpha 5	Plasma Membrane	transmembrane receptor	2.35836e-10	1.66796e-12	down	2.56143	-2.56143	-1.35695
Clathrin-mediated Endocytosis Signaling	2.29	0.116	NaN	PCYOX1	prenylcysteine oxidase 1	Cytoplasm	enzyme	4.98251e-07	3.12451e-08	up	1.65033	1.65033	0.722753
Clathrin-mediated Endocytosis Signaling	2.29	0.116	NaN	TSG101	tumor susceptibility 101	Cytoplasm	transcription regulator	7.41641e-09	1.63962e-10	down	1.56909	-1.56909	-0.649927
Clathrin-mediated Endocytosis Signaling	2.29	0.116	NaN	PDGFB	platelet derived growth factor subunit B	Extracellular Space	growth factor	7.58112e-09	1.67989e-10	down	1.56623	-1.56623	-0.647293
Clathrin-mediated Endocytosis Signaling	2.29	0.116	NaN	ITGB3	integrin subunit beta 3	Plasma Membrane	transmembrane receptor	2.10739e-06	1.77301e-07	down	1.98681	-1.98681	-0.990453
Clathrin-mediated Endocytosis Signaling	2.29	0.116	NaN	MET	MET proto-oncogene, receptor tyrosine kinase	Plasma Membrane	kinase	1.12073e-05	1.2993e-06	down	1.5292	-1.5292	-0.61278
Clathrin-mediated Endocytosis Signaling	2.29	0.116	NaN	PIK3R3	phosphoinositide-3-kinase regulatory subunit 3	Cytoplasm	kinase	8.33611e-08	3.4717e-09	down	1.6323	-1.6323	-0.706907
Clathrin-mediated Endocytosis Signaling	2.29	0.116	NaN	DNM1	dynamin 1	Cytoplasm	enzyme	1.12992e-06	8.45705e-08	up	1.6039	1.6039	0.681587
Clathrin-mediated Endocytosis Signaling	2.29	0.116	NaN	CSNK2A2	casein kinase 2 alpha 2	Cytoplasm	kinase	6.838e-06	7.22554e-07	up	1.75656	1.75656	0.812757
Clathrin-mediated Endocytosis Signaling	2.29	0.116	NaN	RAB5A	RAB5A, member RAS oncogene family	Cytoplasm	enzyme	2.16443e-13	2.20259e-17	up	3.40568	3.40568	1.76794
Clathrin-mediated Endocytosis Signaling	2.29	0.116	NaN	CDC42	cell division cycle 42	Cytoplasm	enzyme	7.68247e-08	3.11153e-09	up	1.53845	1.53845	0.621477
Clathrin-mediated Endocytosis Signaling	2.29	0.116	NaN	TFRC	transferrin receptor	Plasma Membrane	transporter	2.39847e-09	3.90522e-11	up	1.9765	1.9765	0.98295
Clathrin-mediated Endocytosis Signaling	2.29	0.116	NaN	SERPINA1	serpin family A member 1	Extracellular Space	other	1.3391e-06	1.0377e-07	down	1.54524	-1.54524	-0.62783
Clathrin-mediated Endocytosis Signaling	2.29	0.116	NaN	CLU	clusterin	Cytoplasm	other	9.71056e-08	4.19975e-09	down	1.7415	-1.7415	-0.800327
Osteoarthritis Pathway	2.28	0.114	-1.091	SMAD2	SMAD family member 2	Nucleus	transcription regulator	1.4095e-06	1.10481e-07	up	1.52286	1.52286	0.606787
Osteoarthritis Pathway	2.28	0.114	-1.091	HDAC4	histone deacetylase 4	Nucleus	transcription regulator	3.86368e-06	3.6767e-07	down	1.71516	-1.71516	-0.778347
Osteoarthritis Pathway	2.28	0.114	-1.091	EPAS1	endothelial PAS domain protein 1	Nucleus	transcription regulator	9.89882e-07	7.20496e-08	down	1.57668	-1.57668	-0.656893
Osteoarthritis Pathway	2.28	0.114	-1.091	GLI2	GLI family zinc finger 2	Nucleus	transcription regulator	1.94255e-05	2.48385e-06	down	1.5497	-1.5497	-0.631987
Osteoarthritis Pathway	2.28	0.114	-1.091	DDIT4	DNA damage inducible transcript 4	Cytoplasm	other	2.37898e-11	6.89962e-14	down	2.40833	-2.40833	-1.26803
Osteoarthritis Pathway	2.28	0.114	-1.091	MMP3	matrix metallopeptidase 3	Extracellular Space	peptidase	4.25291e-06	4.11366e-07	down	2.59578	-2.59578	-1.37617
Osteoarthritis Pathway	2.28	0.114	-1.091	FGFR1	fibroblast growth factor receptor 1	Plasma Membrane	kinase	0.000247191	4.8071e-05	up	1.50868	1.50868	0.59329
Osteoarthritis Pathway	2.28	0.114	-1.091	ITGA2	integrin subunit alpha 2	Plasma Membrane	transmembrane receptor	1.38403e-07	6.53158e-09	up	1.86016	1.86016	0.895423
Osteoarthritis Pathway	2.28	0.114	-1.091	SMAD6	SMAD family member 6	Nucleus	transcription regulator	0.000169527	3.1083e-05	down	1.53174	-1.53174	-0.615173
Osteoarthritis Pathway	2.28	0.114	-1.091	VEGFC	vascular endothelial growth factor C	Extracellular Space	growth factor	3.58259e-08	1.19581e-09	down	1.61553	-1.61553	-0.692007
Osteoarthritis Pathway	2.28	0.114	-1.091	ITGA5	integrin subunit alpha 5	Plasma Membrane	transmembrane receptor	2.35836e-10	1.66796e-12	down	2.56143	-2.56143	-1.35695
Osteoarthritis Pathway	2.28	0.114	-1.091	SDC4	syndecan 4	Plasma Membrane	other	9.36014e-11	4.85783e-13	down	1.55716	-1.55716	-0.638917
Osteoarthritis Pathway	2.28	0.114	-1.091	SMAD5	SMAD family member 5	Nucleus	transcription regulator	2.78306e-08	8.78668e-10	down	1.68691	-1.68691	-0.754387
Osteoarthritis Pathway	2.28	0.114	-1.091	CREB5	cAMP responsive element binding protein 5	Nucleus	transcription regulator	7.24769e-06	7.75162e-07	down	1.82782	-1.82782	-0.870123
Osteoarthritis Pathway	2.28	0.114	-1.091	TLR2	toll like receptor 2	Plasma Membrane	transmembrane receptor	2.40512e-07	1.28923e-08	down	1.89028	-1.89028	-0.918603
Osteoarthritis Pathway	2.28	0.114	-1.091	HMGB1	high mobility group box 1	Nucleus	transcription regulator	2.54517e-09	4.20881e-11	down	1.80664	-1.80664	-0.85331
Osteoarthritis Pathway	2.28	0.114	-1.091	MTOR	mechanistic target of rapamycin	Nucleus	kinase	2.15174e-08	6.28984e-10	up	1.65752	1.65752	0.729023
Osteoarthritis Pathway	2.28	0.114	-1.091	ELF3	E74 like ETS transcription factor 3	Nucleus	transcription regulator	7.09466e-09	1.54559e-10	down	1.65089	-1.65089	-0.723243
Osteoarthritis Pathway	2.28	0.114	-1.091	RUNX2	runt related transcription factor 2	Nucleus	transcription regulator	2.44957e-06	2.12071e-07	down	1.71705	-1.71705	-0.77993
Osteoarthritis Pathway	2.28	0.114	-1.091	FOXO3	forkhead box O3	Nucleus	transcription regulator	6.36945e-09	1.34477e-10	down	1.57783	-1.57783	-0.657943
Osteoarthritis Pathway	2.28	0.114	-1.091	PRKAA2	protein kinase AMP-activated catalytic subunit alpha 2	Cytoplasm	kinase	2.10783e-08	6.11859e-10	up	2.56896	2.56896	1.36119
Osteoarthritis Pathway	2.28	0.114	-1.091	PTGS2	prostaglandin-endoperoxide synthase 2	Cytoplasm	enzyme	7.99585e-06	8.7125e-07	down	1.80716	-1.80716	-0.853727
Osteoarthritis Pathway	2.28	0.114	-1.091	JAG1	jagged 1	Extracellular Space	growth factor	2.48142e-08	7.55026e-10	down	1.86525	-1.86525	-0.89937
Osteoarthritis Pathway	2.28	0.114	-1.091	IL1RAP	interleukin 1 receptor accessory protein	Plasma Membrane	transmembrane receptor	5.40659e-07	3.4586e-08	down	2.1287	-2.1287	-1.08997
Tight Junction Signaling	2.23	0.12	NaN	PRKACB	protein kinase cAMP-activated catalytic subunit beta	Cytoplasm	kinase	3.85749e-08	1.31897e-09	down	2.07728	-2.07728	-1.0547
Tight Junction Signaling	2.23	0.12	NaN	CLDN11	claudin 11	Plasma Membrane	other	1.77638e-07	8.9255e-09	down	1.5812	-1.5812	-0.661023
Tight Junction Signaling	2.23	0.12	NaN	TJP2	tight junction protein 2	Plasma Membrane	kinase	1.97025e-08	5.6641e-10	up	1.58858	1.58858	0.667733
Tight Junction Signaling	2.23	0.12	NaN	VAPA	VAMP associated protein A	Plasma Membrane	other	7.79182e-11	3.80601e-13	down	1.6646	-1.6646	-0.735173
Tight Junction Signaling	2.23	0.12	NaN	NECTIN3	nectin cell adhesion molecule 3	Plasma Membrane	other	5.27361e-10	4.91042e-12	down	2.21774	-2.21774	-1.14909
Tight Junction Signaling	2.23	0.12	NaN	PRKAR2A	protein kinase cAMP-dependent type II regulatory subunit alpha	Cytoplasm	kinase	1.6572e-09	2.35652e-11	up	1.61798	1.61798	0.694197
Tight Junction Signaling	2.23	0.12	NaN	VTI1B	vesicle transport through interaction with t-SNAREs 1B	Plasma Membrane	transporter	1.57007e-07	7.69315e-09	up	1.77418	1.77418	0.827153
Tight Junction Signaling	2.23	0.12	NaN	PPP2R5A	protein phosphatase 2 regulatory subunit B'alpha	Cytoplasm	phosphatase	4.36257e-10	3.81011e-12	up	1.99923	1.99923	0.999443
Tight Junction Signaling	2.23	0.12	NaN	PTEN	phosphatase and tensin homolog	Cytoplasm	phosphatase	4.30522e-08	1.52354e-09	down	2.05755	-2.05755	-1.04093
Tight Junction Signaling	2.23	0.12	NaN	CPSF6	cleavage and polyadenylation specific factor 6	Nucleus	other	8.25458e-08	3.42935e-09	down	1.61343	-1.61343	-0.690133
Tight Junction Signaling	2.23	0.12	NaN	PRKAR2B	protein kinase cAMP-dependent type II regulatory subunit beta	Cytoplasm	kinase	1.11727e-05	1.29359e-06	up	1.57564	1.57564	0.655937
Tight Junction Signaling	2.23	0.12	NaN	CLDN4	claudin 4	Plasma Membrane	transmembrane receptor	5.18744e-05	7.82861e-06	down	1.78455	-1.78455	-0.83556
Tight Junction Signaling	2.23	0.12	NaN	CDC42	cell division cycle 42	Cytoplasm	enzyme	7.68247e-08	3.11153e-09	up	1.53845	1.53845	0.621477
Tight Junction Signaling	2.23	0.12	NaN	CLDN1	claudin 1	Plasma Membrane	other	1.77171e-09	2.60526e-11	down	1.6058	-1.6058	-0.683297
Tight Junction Signaling	2.23	0.12	NaN	AKT3	AKT serine/threonine kinase 3	Cytoplasm	kinase	6.87797e-06	7.27745e-07	down	1.6577	-1.6577	-0.72918
Tight Junction Signaling	2.23	0.12	NaN	STX4	syntaxin 4	Plasma Membrane	transporter	1.00265e-07	4.36953e-09	down	1.65824	-1.65824	-0.72965
Tight Junction Signaling	2.23	0.12	NaN	VCL	vinculin	Plasma Membrane	enzyme	7.70988e-11	3.72676e-13	down	1.50646	-1.50646	-0.591167
Tight Junction Signaling	2.23	0.12	NaN	PPP2R1B	protein phosphatase 2 scaffold subunit Abeta	Plasma Membrane	phosphatase	1.07505e-10	5.86427e-13	down	3.55737	-3.55737	-1.83081
Tight Junction Signaling	2.23	0.12	NaN	BET1L	Bet1 golgi vesicular membrane trafficking protein like	Cytoplasm	transporter	1.18892e-09	1.5063e-11	up	1.8773	1.8773	0.908657
Tight Junction Signaling	2.23	0.12	NaN	NAPB	NSF attachment protein beta	Cytoplasm	transporter	0.00034691	7.05963e-05	down	1.50327	-1.50327	-0.588107
Epithelial Adherens Junction Signaling	2.19	0.123	NaN	ACTR2	ARP2 actin related protein 2 homolog	Plasma Membrane	other	4.47975e-11	1.56137e-13	down	2.38126	-2.38126	-1.25172
Epithelial Adherens Junction Signaling	2.19	0.123	NaN	EPN1	epsin 1	Plasma Membrane	other	9.85677e-12	1.88073e-14	up	1.92777	1.92777	0.94693
Epithelial Adherens Junction Signaling	2.19	0.123	NaN	FGFR1	fibroblast growth factor receptor 1	Plasma Membrane	kinase	0.000247191	4.8071e-05	up	1.50868	1.50868	0.59329
Epithelial Adherens Junction Signaling	2.19	0.123	NaN	NECTIN3	nectin cell adhesion molecule 3	Plasma Membrane	other	5.27361e-10	4.91042e-12	down	2.21774	-2.21774	-1.14909
Epithelial Adherens Junction Signaling	2.19	0.123	NaN	WASL	Wiskott-Aldrich syndrome like	Cytoplasm	other	9.38587e-08	4.01634e-09	up	1.60073	1.60073	0.678733
Epithelial Adherens Junction Signaling	2.19	0.123	NaN	CRK	CRK proto-oncogene, adaptor protein	Cytoplasm	other	2.44547e-11	7.27911e-14	down	1.87964	-1.87964	-0.91046
Epithelial Adherens Junction Signaling	2.19	0.123	NaN	RAP1A	RAP1A, member of RAS oncogene family	Cytoplasm	enzyme	1.35837e-14	3.45579e-19	down	2.46964	-2.46964	-1.3043
Epithelial Adherens Junction Signaling	2.19	0.123	NaN	CLIP1	CAP-Gly domain containing linker protein 1	Cytoplasm	other	1.93793e-07	9.87033e-09	up	1.55926	1.55926	0.640863
Epithelial Adherens Junction Signaling	2.19	0.123	NaN	PTEN	phosphatase and tensin homolog	Cytoplasm	phosphatase	4.30522e-08	1.52354e-09	down	2.05755	-2.05755	-1.04093
Epithelial Adherens Junction Signaling	2.19	0.123	NaN	MET	MET proto-oncogene, receptor tyrosine kinase	Plasma Membrane	kinase	1.12073e-05	1.2993e-06	down	1.5292	-1.5292	-0.61278
Epithelial Adherens Junction Signaling	2.19	0.123	NaN	NOTCH2	notch 2	Plasma Membrane	transcription regulator	1.86366e-10	1.21377e-12	down	2.20278	-2.20278	-1.13932
Epithelial Adherens Junction Signaling	2.19	0.123	NaN	TUBA1A	tubulin alpha 1a	Cytoplasm	other	5.82833e-09	1.18918e-10	up	1.53405	1.53405	0.617343
Epithelial Adherens Junction Signaling	2.19	0.123	NaN	CDC42	cell division cycle 42	Cytoplasm	enzyme	7.68247e-08	3.11153e-09	up	1.53845	1.53845	0.621477
Epithelial Adherens Junction Signaling	2.19	0.123	NaN	AKT3	AKT serine/threonine kinase 3	Cytoplasm	kinase	6.87797e-06	7.27745e-07	down	1.6577	-1.6577	-0.72918
Epithelial Adherens Junction Signaling	2.19	0.123	NaN	SSX2IP	SSX family member 2 interacting protein	Plasma Membrane	other	8.55179e-06	9.46443e-07	down	1.59331	-1.59331	-0.672023
Epithelial Adherens Junction Signaling	2.19	0.123	NaN	VCL	vinculin	Plasma Membrane	enzyme	7.70988e-11	3.72676e-13	down	1.50646	-1.50646	-0.591167
Epithelial Adherens Junction Signaling	2.19	0.123	NaN	ACVR2A	activin A receptor type 2A	Plasma Membrane	kinase	3.43638e-05	4.83717e-06	down	1.60096	-1.60096	-0.678933
Epithelial Adherens Junction Signaling	2.19	0.123	NaN	EGFR	epidermal growth factor receptor	Plasma Membrane	kinase	7.80544e-08	3.18516e-09	down	1.65723	-1.65723	-0.728773
VEGF Signaling	2.18	0.136	-1.414	PIK3C2A	phosphatidylinositol-4-phosphate 3-kinase catalytic subunit type 2 alpha	Cytoplasm	kinase	2.82584e-06	2.52843e-07	down	1.59286	-1.59286	-0.671617
VEGF Signaling	2.18	0.136	-1.414	BAD	BCL2 associated agonist of cell death	Cytoplasm	other	1.34915e-08	3.45293e-10	up	1.5081	1.5081	0.59273
VEGF Signaling	2.18	0.136	-1.414	FGFR1	fibroblast growth factor receptor 1	Plasma Membrane	kinase	0.000247191	4.8071e-05	up	1.50868	1.50868	0.59329
VEGF Signaling	2.18	0.136	-1.414	VEGFC	vascular endothelial growth factor C	Extracellular Space	growth factor	3.58259e-08	1.19581e-09	down	1.61553	-1.61553	-0.692007
VEGF Signaling	2.18	0.136	-1.414	EIF2S1	eukaryotic translation initiation factor 2 subunit alpha	Cytoplasm	translation regulator	5.93614e-12	6.81658e-15	up	2.51784	2.51784	1.33219
VEGF Signaling	2.18	0.136	-1.414	EIF2S2	eukaryotic translation initiation factor 2 subunit beta	Cytoplasm	translation regulator	1.22209e-10	7.0062e-13	down	2.37305	-2.37305	-1.24674
VEGF Signaling	2.18	0.136	-1.414	ELAVL1	ELAV like RNA binding protein 1	Cytoplasm	other	1.37507e-05	1.65539e-06	down	1.66689	-1.66689	-0.737157
VEGF Signaling	2.18	0.136	-1.414	PIK3R3	phosphoinositide-3-kinase regulatory subunit 3	Cytoplasm	kinase	8.33611e-08	3.4717e-09	down	1.6323	-1.6323	-0.706907
VEGF Signaling	2.18	0.136	-1.414	FOXO1	forkhead box O1	Nucleus	transcription regulator	1.76954e-08	4.93401e-10	down	1.83353	-1.83353	-0.87462
VEGF Signaling	2.18	0.136	-1.414	MAPK3	mitogen-activated protein kinase 3	Cytoplasm	kinase	4.35448e-07	2.63697e-08	down	1.70674	-1.70674	-0.77124
VEGF Signaling	2.18	0.136	-1.414	FOXO3	forkhead box O3	Nucleus	transcription regulator	6.36945e-09	1.34477e-10	down	1.57783	-1.57783	-0.657943
VEGF Signaling	2.18	0.136	-1.414	EIF2B1	eukaryotic translation initiation factor 2B subunit alpha	Cytoplasm	translation regulator	1.06938e-07	4.77877e-09	up	1.5176	1.5176	0.60179
VEGF Signaling	2.18	0.136	-1.414	AKT3	AKT serine/threonine kinase 3	Cytoplasm	kinase	6.87797e-06	7.27745e-07	down	1.6577	-1.6577	-0.72918
VEGF Signaling	2.18	0.136	-1.414	VCL	vinculin	Plasma Membrane	enzyme	7.70988e-11	3.72676e-13	down	1.50646	-1.50646	-0.591167
Glioma Signaling	2.16	0.132	-1.604	PIK3C2A	phosphatidylinositol-4-phosphate 3-kinase catalytic subunit type 2 alpha	Cytoplasm	kinase	2.82584e-06	2.52843e-07	down	1.59286	-1.59286	-0.671617
Glioma Signaling	2.16	0.132	-1.604	FGFR1	fibroblast growth factor receptor 1	Plasma Membrane	kinase	0.000247191	4.8071e-05	up	1.50868	1.50868	0.59329
Glioma Signaling	2.16	0.132	-1.604	CDK6	cyclin dependent kinase 6	Nucleus	kinase	1.75382e-10	1.12439e-12	down	1.96768	-1.96768	-0.976497
Glioma Signaling	2.16	0.132	-1.604	IGF2R	insulin like growth factor 2 receptor	Plasma Membrane	transmembrane receptor	1.6572e-09	2.36166e-11	down	1.92668	-1.92668	-0.946113
Glioma Signaling	2.16	0.132	-1.604	CCND1	cyclin D1	Nucleus	transcription regulator	6.00024e-10	5.95338e-12	down	2.30478	-2.30478	-1.20463
Glioma Signaling	2.16	0.132	-1.604	PDGFB	platelet derived growth factor subunit B	Extracellular Space	growth factor	7.58112e-09	1.67989e-10	down	1.56623	-1.56623	-0.647293
Glioma Signaling	2.16	0.132	-1.604	IDH1	isocitrate dehydrogenase (NADP(+)) 1, cytosolic	Cytoplasm	enzyme	1.51973e-08	4.04029e-10	up	1.50523	1.50523	0.589983
Glioma Signaling	2.16	0.132	-1.604	PTEN	phosphatase and tensin homolog	Cytoplasm	phosphatase	4.30522e-08	1.52354e-09	down	2.05755	-2.05755	-1.04093
Glioma Signaling	2.16	0.132	-1.604	PIK3R3	phosphoinositide-3-kinase regulatory subunit 3	Cytoplasm	kinase	8.33611e-08	3.4717e-09	down	1.6323	-1.6323	-0.706907
Glioma Signaling	2.16	0.132	-1.604	MTOR	mechanistic target of rapamycin	Nucleus	kinase	2.15174e-08	6.28984e-10	up	1.65752	1.65752	0.729023
Glioma Signaling	2.16	0.132	-1.604	MAPK3	mitogen-activated protein kinase 3	Cytoplasm	kinase	4.35448e-07	2.63697e-08	down	1.70674	-1.70674	-0.77124
Glioma Signaling	2.16	0.132	-1.604	TGFA	transforming growth factor alpha	Extracellular Space	growth factor	2.67995e-08	8.35203e-10	up	1.97187	1.97187	0.979563
Glioma Signaling	2.16	0.132	-1.604	PRKCE	protein kinase C epsilon	Cytoplasm	kinase	5.22833e-10	4.84166e-12	down	2.01678	-2.01678	-1.01205
Glioma Signaling	2.16	0.132	-1.604	AKT3	AKT serine/threonine kinase 3	Cytoplasm	kinase	6.87797e-06	7.27745e-07	down	1.6577	-1.6577	-0.72918
Glioma Signaling	2.16	0.132	-1.604	EGFR	epidermal growth factor receptor	Plasma Membrane	kinase	7.80544e-08	3.18516e-09	down	1.65723	-1.65723	-0.728773
Protein Kinase A Signaling	2.14	0.0975	-0.522	PRKACB	protein kinase cAMP-activated catalytic subunit beta	Cytoplasm	kinase	3.85749e-08	1.31897e-09	down	2.07728	-2.07728	-1.0547
Protein Kinase A Signaling	2.14	0.0975	-0.522	NAPEPLD	N-acyl phosphatidylethanolamine phospholipase D	Cytoplasm	enzyme	4.04913e-07	2.41565e-08	down	1.70998	-1.70998	-0.773983
Protein Kinase A Signaling	2.14	0.0975	-0.522	BAD	BCL2 associated agonist of cell death	Cytoplasm	other	1.34915e-08	3.45293e-10	up	1.5081	1.5081	0.59273
Protein Kinase A Signaling	2.14	0.0975	-0.522	PTPN2	protein tyrosine phosphatase, non-receptor type 2	Cytoplasm	phosphatase	1.86738e-07	9.44925e-09	down	1.88027	-1.88027	-0.910937
Protein Kinase A Signaling	2.14	0.0975	-0.522	NFATC3	nuclear factor of activated T-cells 3	Nucleus	transcription regulator	2.44288e-06	2.1143e-07	down	1.71021	-1.71021	-0.77417
Protein Kinase A Signaling	2.14	0.0975	-0.522	GNB5	G protein subunit beta 5	Plasma Membrane	enzyme	3.71155e-06	3.49654e-07	down	1.5287	-1.5287	-0.612307
Protein Kinase A Signaling	2.14	0.0975	-0.522	CDC23	cell division cycle 23	Nucleus	enzyme	6.65717e-09	1.4379e-10	down	1.56254	-1.56254	-0.643897
Protein Kinase A Signaling	2.14	0.0975	-0.522	PTPRF	protein tyrosine phosphatase, receptor type F	Plasma Membrane	phosphatase	7.40141e-10	7.98532e-12	down	1.71825	-1.71825	-0.780943
Protein Kinase A Signaling	2.14	0.0975	-0.522	PTEN	phosphatase and tensin homolog	Cytoplasm	phosphatase	4.30522e-08	1.52354e-09	down	2.05755	-2.05755	-1.04093
Protein Kinase A Signaling	2.14	0.0975	-0.522	GNB4	G protein subunit beta 4	Plasma Membrane	enzyme	2.91359e-06	2.6225e-07	down	1.9306	-1.9306	-0.949047
Protein Kinase A Signaling	2.14	0.0975	-0.522	DUSP5	dual specificity phosphatase 5	Nucleus	phosphatase	4.51678e-10	3.9759e-12	down	1.79011	-1.79011	-0.84005
Protein Kinase A Signaling	2.14	0.0975	-0.522	DUSP3	dual specificity phosphatase 3	Cytoplasm	phosphatase	1.94499e-08	5.57167e-10	up	1.80993	1.80993	0.85593
Protein Kinase A Signaling	2.14	0.0975	-0.522	HHAT	hedgehog acyltransferase	Cytoplasm	enzyme	1.15337e-06	8.66485e-08	down	1.93723	-1.93723	-0.953993
Protein Kinase A Signaling	2.14	0.0975	-0.522	PTPRJ	protein tyrosine phosphatase, receptor type J	Plasma Membrane	phosphatase	2.36348e-08	7.10764e-10	down	1.70435	-1.70435	-0.769223
Protein Kinase A Signaling	2.14	0.0975	-0.522	PPP1R7	protein phosphatase 1 regulatory subunit 7	Nucleus	phosphatase	1.91811e-08	5.46051e-10	up	1.51893	1.51893	0.603057
Protein Kinase A Signaling	2.14	0.0975	-0.522	MAPK3	mitogen-activated protein kinase 3	Cytoplasm	kinase	4.35448e-07	2.63697e-08	down	1.70674	-1.70674	-0.77124
Protein Kinase A Signaling	2.14	0.0975	-0.522	H1FX	H1 histone family member X	Nucleus	other	1.68506e-10	1.05887e-12	down	1.62941	-1.62941	-0.704347
Protein Kinase A Signaling	2.14	0.0975	-0.522	PRKCE	protein kinase C epsilon	Cytoplasm	kinase	5.22833e-10	4.84166e-12	down	2.01678	-2.01678	-1.01205
Protein Kinase A Signaling	2.14	0.0975	-0.522	GSK3B	glycogen synthase kinase 3 beta	Nucleus	kinase	2.55367e-07	1.38835e-08	up	1.64288	1.64288	0.71623
Protein Kinase A Signaling	2.14	0.0975	-0.522	DUSP12	dual specificity phosphatase 12	Nucleus	phosphatase	4.80782e-09	9.25921e-11	down	1.52957	-1.52957	-0.613127
Protein Kinase A Signaling	2.14	0.0975	-0.522	CDC25A	cell division cycle 25A	Nucleus	phosphatase	2.09251e-08	6.0688e-10	down	1.72289	-1.72289	-0.784827
Protein Kinase A Signaling	2.14	0.0975	-0.522	GNG4	G protein subunit gamma 4	Plasma Membrane	enzyme	2.89549e-05	3.96899e-06	down	1.50766	-1.50766	-0.592307
Protein Kinase A Signaling	2.14	0.0975	-0.522	CDC25C	cell division cycle 25C	Nucleus	phosphatase	1.99828e-07	1.02438e-08	down	1.53353	-1.53353	-0.616857
Protein Kinase A Signaling	2.14	0.0975	-0.522	PTPRK	protein tyrosine phosphatase, receptor type K	Plasma Membrane	phosphatase	0.00197356	0.000515696	down	1.53631	-1.53631	-0.619467
Protein Kinase A Signaling	2.14	0.0975	-0.522	YWHAG	tyrosine 3-monooxygenase/tryptophan 5-monooxygenase activation protein gamma	Cytoplasm	other	3.50366e-08	1.1649e-09	down	1.75089	-1.75089	-0.808087
Protein Kinase A Signaling	2.14	0.0975	-0.522	YWHAZ	tyrosine 3-monooxygenase/tryptophan 5-monooxygenase activation protein zeta	Cytoplasm	enzyme	2.82601e-10	2.16809e-12	down	1.5975	-1.5975	-0.67582
Protein Kinase A Signaling	2.14	0.0975	-0.522	PRKAR2A	protein kinase cAMP-dependent type II regulatory subunit alpha	Cytoplasm	kinase	1.6572e-09	2.35652e-11	up	1.61798	1.61798	0.694197
Protein Kinase A Signaling	2.14	0.0975	-0.522	PYGL	glycogen phosphorylase L	Cytoplasm	enzyme	2.65184e-08	8.23747e-10	up	1.50451	1.50451	0.589293
Protein Kinase A Signaling	2.14	0.0975	-0.522	CREB5	cAMP responsive element binding protein 5	Nucleus	transcription regulator	7.24769e-06	7.75162e-07	down	1.82782	-1.82782	-0.870123
Protein Kinase A Signaling	2.14	0.0975	-0.522	RAP1A	RAP1A, member of RAS oncogene family	Cytoplasm	enzyme	1.35837e-14	3.45579e-19	down	2.46964	-2.46964	-1.3043
Protein Kinase A Signaling	2.14	0.0975	-0.522	GNAI3	G protein subunit alpha i3	Cytoplasm	enzyme	1.09582e-07	4.92056e-09	down	1.51852	-1.51852	-0.602667
Protein Kinase A Signaling	2.14	0.0975	-0.522	H3F3A/H3F3B	H3 histone family member 3A	Nucleus	other	9.30595e-12	1.75195e-14	down	2.3275	-2.3275	-1.21878
Protein Kinase A Signaling	2.14	0.0975	-0.522	PRKAR2B	protein kinase cAMP-dependent type II regulatory subunit beta	Cytoplasm	kinase	1.11727e-05	1.29359e-06	up	1.57564	1.57564	0.655937
Protein Kinase A Signaling	2.14	0.0975	-0.522	AKAP10	A-kinase anchoring protein 10	Cytoplasm	other	3.96971e-05	5.73536e-06	down	1.68024	-1.68024	-0.748667
Protein Kinase A Signaling	2.14	0.0975	-0.522	NFATC2	nuclear factor of activated T-cells 2	Nucleus	transcription regulator	2.81161e-08	8.90543e-10	down	1.87801	-1.87801	-0.909203
Protein Kinase A Signaling	2.14	0.0975	-0.522	PTGS2	prostaglandin-endoperoxide synthase 2	Cytoplasm	enzyme	7.99585e-06	8.7125e-07	down	1.80716	-1.80716	-0.853727
Protein Kinase A Signaling	2.14	0.0975	-0.522	EBI3	Epstein-Barr virus induced 3	Extracellular Space	cytokine	1.87533e-07	9.49425e-09	down	1.53275	-1.53275	-0.61612
Protein Kinase A Signaling	2.14	0.0975	-0.522	CDC27	cell division cycle 27	Nucleus	other	3.27825e-10	2.6237e-12	up	1.87923	1.87923	0.91014
Protein Kinase A Signaling	2.14	0.0975	-0.522	AKAP1	A-kinase anchoring protein 1	Cytoplasm	other	2.59427e-10	1.92721e-12	up	1.95957	1.95957	0.970537
HGF Signaling	2.13	0.13	-1.732	ETS1	ETS proto-oncogene 1, transcription factor	Nucleus	transcription regulator	7.6565e-11	3.63023e-13	down	1.5292	-1.5292	-0.612773
HGF Signaling	2.13	0.13	-1.732	PIK3C2A	phosphatidylinositol-4-phosphate 3-kinase catalytic subunit type 2 alpha	Cytoplasm	kinase	2.82584e-06	2.52843e-07	down	1.59286	-1.59286	-0.671617
HGF Signaling	2.13	0.13	-1.732	FGFR1	fibroblast growth factor receptor 1	Plasma Membrane	kinase	0.000247191	4.8071e-05	up	1.50868	1.50868	0.59329
HGF Signaling	2.13	0.13	-1.732	ITGA2	integrin subunit alpha 2	Plasma Membrane	transmembrane receptor	1.38403e-07	6.53158e-09	up	1.86016	1.86016	0.895423
HGF Signaling	2.13	0.13	-1.732	ITGA5	integrin subunit alpha 5	Plasma Membrane	transmembrane receptor	2.35836e-10	1.66796e-12	down	2.56143	-2.56143	-1.35695
HGF Signaling	2.13	0.13	-1.732	RAP1A	RAP1A, member of RAS oncogene family	Cytoplasm	enzyme	1.35837e-14	3.45579e-19	down	2.46964	-2.46964	-1.3043
HGF Signaling	2.13	0.13	-1.732	CCND1	cyclin D1	Nucleus	transcription regulator	6.00024e-10	5.95338e-12	down	2.30478	-2.30478	-1.20463
HGF Signaling	2.13	0.13	-1.732	PIK3R3	phosphoinositide-3-kinase regulatory subunit 3	Cytoplasm	kinase	8.33611e-08	3.4717e-09	down	1.6323	-1.6323	-0.706907
HGF Signaling	2.13	0.13	-1.732	MET	MET proto-oncogene, receptor tyrosine kinase	Plasma Membrane	kinase	1.12073e-05	1.2993e-06	down	1.5292	-1.5292	-0.61278
HGF Signaling	2.13	0.13	-1.732	ELF3	E74 like ETS transcription factor 3	Nucleus	transcription regulator	7.09466e-09	1.54559e-10	down	1.65089	-1.65089	-0.723243
HGF Signaling	2.13	0.13	-1.732	CDC42	cell division cycle 42	Cytoplasm	enzyme	7.68247e-08	3.11153e-09	up	1.53845	1.53845	0.621477
HGF Signaling	2.13	0.13	-1.732	MAPK3	mitogen-activated protein kinase 3	Cytoplasm	kinase	4.35448e-07	2.63697e-08	down	1.70674	-1.70674	-0.77124
HGF Signaling	2.13	0.13	-1.732	PRKCE	protein kinase C epsilon	Cytoplasm	kinase	5.22833e-10	4.84166e-12	down	2.01678	-2.01678	-1.01205
HGF Signaling	2.13	0.13	-1.732	AKT3	AKT serine/threonine kinase 3	Cytoplasm	kinase	6.87797e-06	7.27745e-07	down	1.6577	-1.6577	-0.72918
HGF Signaling	2.13	0.13	-1.732	PTGS2	prostaglandin-endoperoxide synthase 2	Cytoplasm	enzyme	7.99585e-06	8.7125e-07	down	1.80716	-1.80716	-0.853727
Superpathway of Serine and Glycine Biosynthesis I	2.11	0.429	NaN	PSAT1	phosphoserine aminotransferase 1	Cytoplasm	enzyme	5.4597e-10	5.2226e-12	down	1.62843	-1.62843	-0.70348
Superpathway of Serine and Glycine Biosynthesis I	2.11	0.429	NaN	PHGDH	phosphoglycerate dehydrogenase	Cytoplasm	enzyme	8.11063e-10	9.09299e-12	down	1.79984	-1.79984	-0.84787
Superpathway of Serine and Glycine Biosynthesis I	2.11	0.429	NaN	SHMT1	serine hydroxymethyltransferase 1	Cytoplasm	enzyme	4.34743e-10	3.78259e-12	up	1.72148	1.72148	0.783653
Cholesterol Biosynthesis I	2.11	0.308	NaN	SQLE	squalene epoxidase	Cytoplasm	enzyme	1.97562e-10	1.3269e-12	up	2.0635	2.0635	1.04509
Cholesterol Biosynthesis I	2.11	0.308	NaN	LSS	lanosterol synthase	Cytoplasm	enzyme	1.02318e-06	7.48768e-08	up	1.56758	1.56758	0.648537
Cholesterol Biosynthesis I	2.11	0.308	NaN	SC5D	sterol-C5-desaturase	Cytoplasm	enzyme	8.04495e-09	1.80909e-10	down	2.06554	-2.06554	-1.04652
Cholesterol Biosynthesis I	2.11	0.308	NaN	LBR	lamin B receptor	Nucleus	enzyme	3.48659e-11	1.13538e-13	down	1.80311	-1.80311	-0.85049
Cholesterol Biosynthesis II (via 24,25-dihydrolanosterol)	2.11	0.308	NaN	SQLE	squalene epoxidase	Cytoplasm	enzyme	1.97562e-10	1.3269e-12	up	2.0635	2.0635	1.04509
Cholesterol Biosynthesis II (via 24,25-dihydrolanosterol)	2.11	0.308	NaN	LSS	lanosterol synthase	Cytoplasm	enzyme	1.02318e-06	7.48768e-08	up	1.56758	1.56758	0.648537
Cholesterol Biosynthesis II (via 24,25-dihydrolanosterol)	2.11	0.308	NaN	SC5D	sterol-C5-desaturase	Cytoplasm	enzyme	8.04495e-09	1.80909e-10	down	2.06554	-2.06554	-1.04652
Cholesterol Biosynthesis II (via 24,25-dihydrolanosterol)	2.11	0.308	NaN	LBR	lamin B receptor	Nucleus	enzyme	3.48659e-11	1.13538e-13	down	1.80311	-1.80311	-0.85049
Cholesterol Biosynthesis III (via Desmosterol)	2.11	0.308	NaN	SQLE	squalene epoxidase	Cytoplasm	enzyme	1.97562e-10	1.3269e-12	up	2.0635	2.0635	1.04509
Cholesterol Biosynthesis III (via Desmosterol)	2.11	0.308	NaN	LSS	lanosterol synthase	Cytoplasm	enzyme	1.02318e-06	7.48768e-08	up	1.56758	1.56758	0.648537
Cholesterol Biosynthesis III (via Desmosterol)	2.11	0.308	NaN	SC5D	sterol-C5-desaturase	Cytoplasm	enzyme	8.04495e-09	1.80909e-10	down	2.06554	-2.06554	-1.04652
Cholesterol Biosynthesis III (via Desmosterol)	2.11	0.308	NaN	LBR	lamin B receptor	Nucleus	enzyme	3.48659e-11	1.13538e-13	down	1.80311	-1.80311	-0.85049
ERK5 Signaling	2.01	0.152	-1.897	IL6ST	interleukin 6 signal transducer	Plasma Membrane	transmembrane receptor	6.03046e-08	2.32431e-09	down	1.62111	-1.62111	-0.696983
ERK5 Signaling	2.01	0.152	-1.897	YWHAG	tyrosine 3-monooxygenase/tryptophan 5-monooxygenase activation protein gamma	Cytoplasm	other	3.50366e-08	1.1649e-09	down	1.75089	-1.75089	-0.808087
ERK5 Signaling	2.01	0.152	-1.897	BAD	BCL2 associated agonist of cell death	Cytoplasm	other	1.34915e-08	3.45293e-10	up	1.5081	1.5081	0.59273
ERK5 Signaling	2.01	0.152	-1.897	FOXO3	forkhead box O3	Nucleus	transcription regulator	6.36945e-09	1.34477e-10	down	1.57783	-1.57783	-0.657943
ERK5 Signaling	2.01	0.152	-1.897	YWHAZ	tyrosine 3-monooxygenase/tryptophan 5-monooxygenase activation protein zeta	Cytoplasm	enzyme	2.82601e-10	2.16809e-12	down	1.5975	-1.5975	-0.67582
ERK5 Signaling	2.01	0.152	-1.897	RPS6KA1	ribosomal protein S6 kinase A1	Cytoplasm	kinase	3.83157e-08	1.30677e-09	down	1.61813	-1.61813	-0.694327
ERK5 Signaling	2.01	0.152	-1.897	NGF	nerve growth factor	Extracellular Space	growth factor	3.4574e-09	6.13073e-11	down	2.06288	-2.06288	-1.04466
ERK5 Signaling	2.01	0.152	-1.897	CREB5	cAMP responsive element binding protein 5	Nucleus	transcription regulator	7.24769e-06	7.75162e-07	down	1.82782	-1.82782	-0.870123
ERK5 Signaling	2.01	0.152	-1.897	MAP2K5	mitogen-activated protein kinase kinase 5	Cytoplasm	kinase	6.66854e-05	1.04964e-05	up	1.62147	1.62147	0.697307
ERK5 Signaling	2.01	0.152	-1.897	EGFR	epidermal growth factor receptor	Plasma Membrane	kinase	7.80544e-08	3.18516e-09	down	1.65723	-1.65723	-0.728773
UVB-Induced MAPK Signaling	2.01	0.152	-1	PIK3R3	phosphoinositide-3-kinase regulatory subunit 3	Cytoplasm	kinase	8.33611e-08	3.4717e-09	down	1.6323	-1.6323	-0.706907
UVB-Induced MAPK Signaling	2.01	0.152	-1	MTOR	mechanistic target of rapamycin	Nucleus	kinase	2.15174e-08	6.28984e-10	up	1.65752	1.65752	0.729023
UVB-Induced MAPK Signaling	2.01	0.152	-1	H3F3A/H3F3B	H3 histone family member 3A	Nucleus	other	9.30595e-12	1.75195e-14	down	2.3275	-2.3275	-1.21878
UVB-Induced MAPK Signaling	2.01	0.152	-1	BAD	BCL2 associated agonist of cell death	Cytoplasm	other	1.34915e-08	3.45293e-10	up	1.5081	1.5081	0.59273
UVB-Induced MAPK Signaling	2.01	0.152	-1	PIK3C2A	phosphatidylinositol-4-phosphate 3-kinase catalytic subunit type 2 alpha	Cytoplasm	kinase	2.82584e-06	2.52843e-07	down	1.59286	-1.59286	-0.671617
UVB-Induced MAPK Signaling	2.01	0.152	-1	MAPK3	mitogen-activated protein kinase 3	Cytoplasm	kinase	4.35448e-07	2.63697e-08	down	1.70674	-1.70674	-0.77124
UVB-Induced MAPK Signaling	2.01	0.152	-1	FGFR1	fibroblast growth factor receptor 1	Plasma Membrane	kinase	0.000247191	4.8071e-05	up	1.50868	1.50868	0.59329
UVB-Induced MAPK Signaling	2.01	0.152	-1	PRKCE	protein kinase C epsilon	Cytoplasm	kinase	5.22833e-10	4.84166e-12	down	2.01678	-2.01678	-1.01205
UVB-Induced MAPK Signaling	2.01	0.152	-1	EIF4E	eukaryotic translation initiation factor 4E	Cytoplasm	translation regulator	1.1558e-09	1.44963e-11	down	2.9448	-2.9448	-1.55817
UVB-Induced MAPK Signaling	2.01	0.152	-1	EGFR	epidermal growth factor receptor	Plasma Membrane	kinase	7.80544e-08	3.18516e-09	down	1.65723	-1.65723	-0.728773
Ephrin Receptor Signaling	2.01	0.114	-0.832	GNG4	G protein subunit gamma 4	Plasma Membrane	enzyme	2.89549e-05	3.96899e-06	down	1.50766	-1.50766	-0.592307
Ephrin Receptor Signaling	2.01	0.114	-0.832	ACTR2	ARP2 actin related protein 2 homolog	Plasma Membrane	other	4.47975e-11	1.56137e-13	down	2.38126	-2.38126	-1.25172
Ephrin Receptor Signaling	2.01	0.114	-0.832	GNA11	G protein subunit alpha 11	Plasma Membrane	enzyme	4.84133e-08	1.76622e-09	up	1.59017	1.59017	0.669177
Ephrin Receptor Signaling	2.01	0.114	-0.832	ITGA2	integrin subunit alpha 2	Plasma Membrane	transmembrane receptor	1.38403e-07	6.53158e-09	up	1.86016	1.86016	0.895423
Ephrin Receptor Signaling	2.01	0.114	-0.832	WASL	Wiskott-Aldrich syndrome like	Cytoplasm	other	9.38587e-08	4.01634e-09	up	1.60073	1.60073	0.678733
Ephrin Receptor Signaling	2.01	0.114	-0.832	GNB5	G protein subunit beta 5	Plasma Membrane	enzyme	3.71155e-06	3.49654e-07	down	1.5287	-1.5287	-0.612307
Ephrin Receptor Signaling	2.01	0.114	-0.832	VEGFC	vascular endothelial growth factor C	Extracellular Space	growth factor	3.58259e-08	1.19581e-09	down	1.61553	-1.61553	-0.692007
Ephrin Receptor Signaling	2.01	0.114	-0.832	ITGA5	integrin subunit alpha 5	Plasma Membrane	transmembrane receptor	2.35836e-10	1.66796e-12	down	2.56143	-2.56143	-1.35695
Ephrin Receptor Signaling	2.01	0.114	-0.832	CRK	CRK proto-oncogene, adaptor protein	Cytoplasm	other	2.44547e-11	7.27911e-14	down	1.87964	-1.87964	-0.91046
Ephrin Receptor Signaling	2.01	0.114	-0.832	CREB5	cAMP responsive element binding protein 5	Nucleus	transcription regulator	7.24769e-06	7.75162e-07	down	1.82782	-1.82782	-0.870123
Ephrin Receptor Signaling	2.01	0.114	-0.832	RAP1A	RAP1A, member of RAS oncogene family	Cytoplasm	enzyme	1.35837e-14	3.45579e-19	down	2.46964	-2.46964	-1.3043
Ephrin Receptor Signaling	2.01	0.114	-0.832	PDGFB	platelet derived growth factor subunit B	Extracellular Space	growth factor	7.58112e-09	1.67989e-10	down	1.56623	-1.56623	-0.647293
Ephrin Receptor Signaling	2.01	0.114	-0.832	GNB4	G protein subunit beta 4	Plasma Membrane	enzyme	2.91359e-06	2.6225e-07	down	1.9306	-1.9306	-0.949047
Ephrin Receptor Signaling	2.01	0.114	-0.832	GNAI3	G protein subunit alpha i3	Cytoplasm	enzyme	1.09582e-07	4.92056e-09	down	1.51852	-1.51852	-0.602667
Ephrin Receptor Signaling	2.01	0.114	-0.832	CFL2	cofilin 2	Extracellular Space	other	1.08471e-11	2.31805e-14	down	2.63909	-2.63909	-1.40004
Ephrin Receptor Signaling	2.01	0.114	-0.832	CDC42	cell division cycle 42	Cytoplasm	enzyme	7.68247e-08	3.11153e-09	up	1.53845	1.53845	0.621477
Ephrin Receptor Signaling	2.01	0.114	-0.832	SDC2	syndecan 2	Plasma Membrane	other	4.83968e-10	4.38326e-12	up	2.19518	2.19518	1.13434
Ephrin Receptor Signaling	2.01	0.114	-0.832	MAPK3	mitogen-activated protein kinase 3	Cytoplasm	kinase	4.35448e-07	2.63697e-08	down	1.70674	-1.70674	-0.77124
Ephrin Receptor Signaling	2.01	0.114	-0.832	AKT3	AKT serine/threonine kinase 3	Cytoplasm	kinase	6.87797e-06	7.27745e-07	down	1.6577	-1.6577	-0.72918
Ephrin Receptor Signaling	2.01	0.114	-0.832	EPHA2	EPH receptor A2	Plasma Membrane	kinase	7.7693e-09	1.7295e-10	down	1.5003	-1.5003	-0.585247
Role of CHK Proteins in Cell Cycle Checkpoint Control	1.97	0.158	-0.816	CDC25C	cell division cycle 25C	Nucleus	phosphatase	1.99828e-07	1.02438e-08	down	1.53353	-1.53353	-0.616857
Role of CHK Proteins in Cell Cycle Checkpoint Control	1.97	0.158	-0.816	MRE11	MRE11 homolog, double strand break repair nuclease	Nucleus	enzyme	1.56027e-05	1.92558e-06	down	1.56939	-1.56939	-0.650207
Role of CHK Proteins in Cell Cycle Checkpoint Control	1.97	0.158	-0.816	RFC5	replication factor C subunit 5	Nucleus	enzyme	7.82776e-12	1.31435e-14	down	2.7852	-2.7852	-1.47778
Role of CHK Proteins in Cell Cycle Checkpoint Control	1.97	0.158	-0.816	BRCA1	BRCA1, DNA repair associated	Nucleus	transcription regulator	2.40849e-06	2.07963e-07	down	1.52917	-1.52917	-0.612753
Role of CHK Proteins in Cell Cycle Checkpoint Control	1.97	0.158	-0.816	PPP2R1B	protein phosphatase 2 scaffold subunit Abeta	Plasma Membrane	phosphatase	1.07505e-10	5.86427e-13	down	3.55737	-3.55737	-1.83081
Role of CHK Proteins in Cell Cycle Checkpoint Control	1.97	0.158	-0.816	PPP2R5A	protein phosphatase 2 regulatory subunit B'alpha	Cytoplasm	phosphatase	4.36257e-10	3.81011e-12	up	1.99923	1.99923	0.999443
Role of CHK Proteins in Cell Cycle Checkpoint Control	1.97	0.158	-0.816	RAD1	RAD1 checkpoint DNA exonuclease	Nucleus	enzyme	3.37009e-08	1.11202e-09	down	1.81704	-1.81704	-0.86159
Role of CHK Proteins in Cell Cycle Checkpoint Control	1.97	0.158	-0.816	CDC25A	cell division cycle 25A	Nucleus	phosphatase	2.09251e-08	6.0688e-10	down	1.72289	-1.72289	-0.784827
Role of CHK Proteins in Cell Cycle Checkpoint Control	1.97	0.158	-0.816	RFC3	replication factor C subunit 3	Nucleus	enzyme	1.72716e-08	4.78508e-10	down	1.51502	-1.51502	-0.599333
3-phosphoinositide Biosynthesis	1.97	0.11	NaN	CDC25C	cell division cycle 25C	Nucleus	phosphatase	1.99828e-07	1.02438e-08	down	1.53353	-1.53353	-0.616857
3-phosphoinositide Biosynthesis	1.97	0.11	NaN	PIK3C2A	phosphatidylinositol-4-phosphate 3-kinase catalytic subunit type 2 alpha	Cytoplasm	kinase	2.82584e-06	2.52843e-07	down	1.59286	-1.59286	-0.671617
3-phosphoinositide Biosynthesis	1.97	0.11	NaN	MTMR9	myotubularin related protein 9	Cytoplasm	phosphatase	1.22625e-08	3.0604e-10	down	2.25266	-2.25266	-1.17163
3-phosphoinositide Biosynthesis	1.97	0.11	NaN	PTPN2	protein tyrosine phosphatase, non-receptor type 2	Cytoplasm	phosphatase	1.86738e-07	9.44925e-09	down	1.88027	-1.88027	-0.910937
3-phosphoinositide Biosynthesis	1.97	0.11	NaN	FGFR1	fibroblast growth factor receptor 1	Plasma Membrane	kinase	0.000247191	4.8071e-05	up	1.50868	1.50868	0.59329
3-phosphoinositide Biosynthesis	1.97	0.11	NaN	PIP4K2B	phosphatidylinositol-5-phosphate 4-kinase type 2 beta	Cytoplasm	kinase	4.19788e-08	1.47519e-09	down	1.58895	-1.58895	-0.668073
3-phosphoinositide Biosynthesis	1.97	0.11	NaN	ERBB3	erb-b2 receptor tyrosine kinase 3	Plasma Membrane	kinase	3.01109e-07	1.69449e-08	up	1.67148	1.67148	0.741127
3-phosphoinositide Biosynthesis	1.97	0.11	NaN	PXYLP1	2-phosphoxylose phosphatase 1	Cytoplasm	phosphatase	1.81024e-09	2.68494e-11	down	1.85496	-1.85496	-0.89139
3-phosphoinositide Biosynthesis	1.97	0.11	NaN	PTPRF	protein tyrosine phosphatase, receptor type F	Plasma Membrane	phosphatase	7.40141e-10	7.98532e-12	down	1.71825	-1.71825	-0.780943
3-phosphoinositide Biosynthesis	1.97	0.11	NaN	PPP2R5A	protein phosphatase 2 regulatory subunit B'alpha	Cytoplasm	phosphatase	4.36257e-10	3.81011e-12	up	1.99923	1.99923	0.999443
3-phosphoinositide Biosynthesis	1.97	0.11	NaN	PTEN	phosphatase and tensin homolog	Cytoplasm	phosphatase	4.30522e-08	1.52354e-09	down	2.05755	-2.05755	-1.04093
3-phosphoinositide Biosynthesis	1.97	0.11	NaN	MET	MET proto-oncogene, receptor tyrosine kinase	Plasma Membrane	kinase	1.12073e-05	1.2993e-06	down	1.5292	-1.5292	-0.61278
3-phosphoinositide Biosynthesis	1.97	0.11	NaN	PIK3R3	phosphoinositide-3-kinase regulatory subunit 3	Cytoplasm	kinase	8.33611e-08	3.4717e-09	down	1.6323	-1.6323	-0.706907
3-phosphoinositide Biosynthesis	1.97	0.11	NaN	DUSP5	dual specificity phosphatase 5	Nucleus	phosphatase	4.51678e-10	3.9759e-12	down	1.79011	-1.79011	-0.84005
3-phosphoinositide Biosynthesis	1.97	0.11	NaN	PTPRJ	protein tyrosine phosphatase, receptor type J	Plasma Membrane	phosphatase	2.36348e-08	7.10764e-10	down	1.70435	-1.70435	-0.769223
3-phosphoinositide Biosynthesis	1.97	0.11	NaN	PPP1R7	protein phosphatase 1 regulatory subunit 7	Nucleus	phosphatase	1.91811e-08	5.46051e-10	up	1.51893	1.51893	0.603057
3-phosphoinositide Biosynthesis	1.97	0.11	NaN	PPM1H	protein phosphatase, Mg2+/Mn2+ dependent 1H	Nucleus	phosphatase	8.71728e-07	6.16089e-08	up	1.64629	1.64629	0.719217
3-phosphoinositide Biosynthesis	1.97	0.11	NaN	PRUNE1	prune exopolyphosphatase 1	Nucleus	enzyme	9.36801e-09	2.16165e-10	down	1.64782	-1.64782	-0.720557
3-phosphoinositide Biosynthesis	1.97	0.11	NaN	DUSP12	dual specificity phosphatase 12	Nucleus	phosphatase	4.80782e-09	9.25921e-11	down	1.52957	-1.52957	-0.613127
3-phosphoinositide Biosynthesis	1.97	0.11	NaN	PIP4K2C	phosphatidylinositol-5-phosphate 4-kinase type 2 gamma	Cytoplasm	kinase	1.35592e-09	1.82482e-11	down	1.8346	-1.8346	-0.875467
3-phosphoinositide Biosynthesis	1.97	0.11	NaN	EGFR	epidermal growth factor receptor	Plasma Membrane	kinase	7.80544e-08	3.18516e-09	down	1.65723	-1.65723	-0.728773
3-phosphoinositide Biosynthesis	1.97	0.11	NaN	CDC25A	cell division cycle 25A	Nucleus	phosphatase	2.09251e-08	6.0688e-10	down	1.72289	-1.72289	-0.784827
p70S6K Signaling	1.94	0.121	-1.604	YWHAG	tyrosine 3-monooxygenase/tryptophan 5-monooxygenase activation protein gamma	Cytoplasm	other	3.50366e-08	1.1649e-09	down	1.75089	-1.75089	-0.808087
p70S6K Signaling	1.94	0.121	-1.604	JAK1	Janus kinase 1	Cytoplasm	kinase	1.06066e-06	7.81996e-08	down	1.54581	-1.54581	-0.62836
p70S6K Signaling	1.94	0.121	-1.604	PIK3C2A	phosphatidylinositol-4-phosphate 3-kinase catalytic subunit type 2 alpha	Cytoplasm	kinase	2.82584e-06	2.52843e-07	down	1.59286	-1.59286	-0.671617
p70S6K Signaling	1.94	0.121	-1.604	BAD	BCL2 associated agonist of cell death	Cytoplasm	other	1.34915e-08	3.45293e-10	up	1.5081	1.5081	0.59273
p70S6K Signaling	1.94	0.121	-1.604	FGFR1	fibroblast growth factor receptor 1	Plasma Membrane	kinase	0.000247191	4.8071e-05	up	1.50868	1.50868	0.59329
p70S6K Signaling	1.94	0.121	-1.604	YWHAZ	tyrosine 3-monooxygenase/tryptophan 5-monooxygenase activation protein zeta	Cytoplasm	enzyme	2.82601e-10	2.16809e-12	down	1.5975	-1.5975	-0.67582
p70S6K Signaling	1.94	0.121	-1.604	PDPK1	3-phosphoinositide dependent protein kinase 1	Cytoplasm	kinase	1.1086e-07	4.99204e-09	up	1.65403	1.65403	0.725987
p70S6K Signaling	1.94	0.121	-1.604	PPP2R5A	protein phosphatase 2 regulatory subunit B'alpha	Cytoplasm	phosphatase	4.36257e-10	3.81011e-12	up	1.99923	1.99923	0.999443
p70S6K Signaling	1.94	0.121	-1.604	PIK3R3	phosphoinositide-3-kinase regulatory subunit 3	Cytoplasm	kinase	8.33611e-08	3.4717e-09	down	1.6323	-1.6323	-0.706907
p70S6K Signaling	1.94	0.121	-1.604	GNAI3	G protein subunit alpha i3	Cytoplasm	enzyme	1.09582e-07	4.92056e-09	down	1.51852	-1.51852	-0.602667
p70S6K Signaling	1.94	0.121	-1.604	MTOR	mechanistic target of rapamycin	Nucleus	kinase	2.15174e-08	6.28984e-10	up	1.65752	1.65752	0.729023
p70S6K Signaling	1.94	0.121	-1.604	MAPK3	mitogen-activated protein kinase 3	Cytoplasm	kinase	4.35448e-07	2.63697e-08	down	1.70674	-1.70674	-0.77124
p70S6K Signaling	1.94	0.121	-1.604	PRKCE	protein kinase C epsilon	Cytoplasm	kinase	5.22833e-10	4.84166e-12	down	2.01678	-2.01678	-1.01205
p70S6K Signaling	1.94	0.121	-1.604	AKT3	AKT serine/threonine kinase 3	Cytoplasm	kinase	6.87797e-06	7.27745e-07	down	1.6577	-1.6577	-0.72918
p70S6K Signaling	1.94	0.121	-1.604	PPP2R1B	protein phosphatase 2 scaffold subunit Abeta	Plasma Membrane	phosphatase	1.07505e-10	5.86427e-13	down	3.55737	-3.55737	-1.83081
p70S6K Signaling	1.94	0.121	-1.604	EGFR	epidermal growth factor receptor	Plasma Membrane	kinase	7.80544e-08	3.18516e-09	down	1.65723	-1.65723	-0.728773
Cell Cycle: G2/M DNA Damage Checkpoint Regulation	1.89	0.163	1.134	CDC25C	cell division cycle 25C	Nucleus	phosphatase	1.99828e-07	1.02438e-08	down	1.53353	-1.53353	-0.616857
Cell Cycle: G2/M DNA Damage Checkpoint Regulation	1.89	0.163	1.134	YWHAG	tyrosine 3-monooxygenase/tryptophan 5-monooxygenase activation protein gamma	Cytoplasm	other	3.50366e-08	1.1649e-09	down	1.75089	-1.75089	-0.808087
Cell Cycle: G2/M DNA Damage Checkpoint Regulation	1.89	0.163	1.134	YWHAZ	tyrosine 3-monooxygenase/tryptophan 5-monooxygenase activation protein zeta	Cytoplasm	enzyme	2.82601e-10	2.16809e-12	down	1.5975	-1.5975	-0.67582
Cell Cycle: G2/M DNA Damage Checkpoint Regulation	1.89	0.163	1.134	BORA	bora, aurora kinase A activator	Cytoplasm	other	1.47187e-08	3.87686e-10	down	1.82139	-1.82139	-0.86504
Cell Cycle: G2/M DNA Damage Checkpoint Regulation	1.89	0.163	1.134	RPS6KA1	ribosomal protein S6 kinase A1	Cytoplasm	kinase	3.83157e-08	1.30677e-09	down	1.61813	-1.61813	-0.694327
Cell Cycle: G2/M DNA Damage Checkpoint Regulation	1.89	0.163	1.134	HIPK2	homeodomain interacting protein kinase 2	Nucleus	kinase	1.7459e-07	8.73239e-09	up	1.74002	1.74002	0.799103
Cell Cycle: G2/M DNA Damage Checkpoint Regulation	1.89	0.163	1.134	BRCA1	BRCA1, DNA repair associated	Nucleus	transcription regulator	2.40849e-06	2.07963e-07	down	1.52917	-1.52917	-0.612753
Cell Cycle: G2/M DNA Damage Checkpoint Regulation	1.89	0.163	1.134	SKP2	S-phase kinase associated protein 2	Nucleus	enzyme	5.42465e-07	3.47364e-08	down	1.88081	-1.88081	-0.911357
Agrin Interactions at Neuromuscular Junction	1.88	0.145	-1	NRG1	neuregulin 1	Plasma Membrane	growth factor	3.52503e-10	2.84582e-12	down	1.97673	-1.97673	-0.983117
Agrin Interactions at Neuromuscular Junction	1.88	0.145	-1	CDC42	cell division cycle 42	Cytoplasm	enzyme	7.68247e-08	3.11153e-09	up	1.53845	1.53845	0.621477
Agrin Interactions at Neuromuscular Junction	1.88	0.145	-1	MAPK3	mitogen-activated protein kinase 3	Cytoplasm	kinase	4.35448e-07	2.63697e-08	down	1.70674	-1.70674	-0.77124
Agrin Interactions at Neuromuscular Junction	1.88	0.145	-1	ITGA2	integrin subunit alpha 2	Plasma Membrane	transmembrane receptor	1.38403e-07	6.53158e-09	up	1.86016	1.86016	0.895423
Agrin Interactions at Neuromuscular Junction	1.88	0.145	-1	ITGA6	integrin subunit alpha 6	Plasma Membrane	transmembrane receptor	4.16708e-10	3.60446e-12	down	1.9976	-1.9976	-0.99827
Agrin Interactions at Neuromuscular Junction	1.88	0.145	-1	ITGA5	integrin subunit alpha 5	Plasma Membrane	transmembrane receptor	2.35836e-10	1.66796e-12	down	2.56143	-2.56143	-1.35695
Agrin Interactions at Neuromuscular Junction	1.88	0.145	-1	ERBB3	erb-b2 receptor tyrosine kinase 3	Plasma Membrane	kinase	3.01109e-07	1.69449e-08	up	1.67148	1.67148	0.741127
Agrin Interactions at Neuromuscular Junction	1.88	0.145	-1	DAG1	dystroglycan 1	Plasma Membrane	transmembrane receptor	4.30211e-08	1.52134e-09	up	1.51181	1.51181	0.596273
Agrin Interactions at Neuromuscular Junction	1.88	0.145	-1	ITGB3	integrin subunit beta 3	Plasma Membrane	transmembrane receptor	2.10739e-06	1.77301e-07	down	1.98681	-1.98681	-0.990453
Agrin Interactions at Neuromuscular Junction	1.88	0.145	-1	EGFR	epidermal growth factor receptor	Plasma Membrane	kinase	7.80544e-08	3.18516e-09	down	1.65723	-1.65723	-0.728773
NRF2-mediated Oxidative Stress Response	1.86	0.109	-1	PIK3C2A	phosphatidylinositol-4-phosphate 3-kinase catalytic subunit type 2 alpha	Cytoplasm	kinase	2.82584e-06	2.52843e-07	down	1.59286	-1.59286	-0.671617
NRF2-mediated Oxidative Stress Response	1.86	0.109	-1	FGFR1	fibroblast growth factor receptor 1	Plasma Membrane	kinase	0.000247191	4.8071e-05	up	1.50868	1.50868	0.59329
NRF2-mediated Oxidative Stress Response	1.86	0.109	-1	NQO1	NAD(P)H quinone dehydrogenase 1	Cytoplasm	enzyme	1.84774e-10	1.1987e-12	down	1.6793	-1.6793	-0.74786
NRF2-mediated Oxidative Stress Response	1.86	0.109	-1	DNAJC19	DnaJ heat shock protein family (Hsp40) member C19	Cytoplasm	other	8.70191e-06	9.6609e-07	down	1.58634	-1.58634	-0.6657
NRF2-mediated Oxidative Stress Response	1.86	0.109	-1	DNAJC15	DnaJ heat shock protein family (Hsp40) member C15	Cytoplasm	other	1.47641e-06	1.16992e-07	down	1.78116	-1.78116	-0.832813
NRF2-mediated Oxidative Stress Response	1.86	0.109	-1	DNAJB9	DnaJ heat shock protein family (Hsp40) member B9	Nucleus	other	6.39291e-08	2.4884e-09	down	1.85901	-1.85901	-0.894533
NRF2-mediated Oxidative Stress Response	1.86	0.109	-1	CUL3	cullin 3	Nucleus	enzyme	3.66237e-07	2.14112e-08	down	1.52139	-1.52139	-0.60539
NRF2-mediated Oxidative Stress Response	1.86	0.109	-1	PIK3R3	phosphoinositide-3-kinase regulatory subunit 3	Cytoplasm	kinase	8.33611e-08	3.4717e-09	down	1.6323	-1.6323	-0.706907
NRF2-mediated Oxidative Stress Response	1.86	0.109	-1	ERP29	endoplasmic reticulum protein 29	Cytoplasm	transporter	7.45842e-13	2.65647e-16	down	3.26688	-3.26688	-1.70791
NRF2-mediated Oxidative Stress Response	1.86	0.109	-1	MAPK3	mitogen-activated protein kinase 3	Cytoplasm	kinase	4.35448e-07	2.63697e-08	down	1.70674	-1.70674	-0.77124
NRF2-mediated Oxidative Stress Response	1.86	0.109	-1	CAT	catalase	Cytoplasm	enzyme	1.66217e-08	4.54598e-10	up	1.5027	1.5027	0.587557
NRF2-mediated Oxidative Stress Response	1.86	0.109	-1	UBE2K	ubiquitin conjugating enzyme E2 K	Cytoplasm	transcription regulator	5.18346e-11	2.03242e-13	down	2.12372	-2.12372	-1.08659
NRF2-mediated Oxidative Stress Response	1.86	0.109	-1	PRKCE	protein kinase C epsilon	Cytoplasm	kinase	5.22833e-10	4.84166e-12	down	2.01678	-2.01678	-1.01205
NRF2-mediated Oxidative Stress Response	1.86	0.109	-1	DNAJA2	DnaJ heat shock protein family (Hsp40) member A2	Nucleus	enzyme	8.4965e-10	9.77031e-12	up	1.61801	1.61801	0.694217
NRF2-mediated Oxidative Stress Response	1.86	0.109	-1	GSK3B	glycogen synthase kinase 3 beta	Nucleus	kinase	2.55367e-07	1.38835e-08	up	1.64288	1.64288	0.71623
NRF2-mediated Oxidative Stress Response	1.86	0.109	-1	NFE2L2	nuclear factor, erythroid 2 like 2	Nucleus	transcription regulator	9.69282e-10	1.14172e-11	down	1.50069	-1.50069	-0.585623
NRF2-mediated Oxidative Stress Response	1.86	0.109	-1	HACD3	3-hydroxyacyl-CoA dehydratase 3	Cytoplasm	enzyme	1.56279e-11	3.85068e-14	up	1.87992	1.87992	0.910673
NRF2-mediated Oxidative Stress Response	1.86	0.109	-1	ENC1	ectodermal-neural cortex 1	Nucleus	peptidase	1.0366e-09	1.25531e-11	down	1.74489	-1.74489	-0.80314
NRF2-mediated Oxidative Stress Response	1.86	0.109	-1	MGST3	microsomal glutathione S-transferase 3	Cytoplasm	enzyme	1.86467e-10	1.22338e-12	down	1.79374	-1.79374	-0.84297
NRF2-mediated Oxidative Stress Response	1.86	0.109	-1	MAP2K5	mitogen-activated protein kinase kinase 5	Cytoplasm	kinase	6.66854e-05	1.04964e-05	up	1.62147	1.62147	0.697307
NRF2-mediated Oxidative Stress Response	1.86	0.109	-1	FTH1	ferritin heavy chain 1	Cytoplasm	enzyme	4.72419e-07	2.92055e-08	down	1.5764	-1.5764	-0.656633
Sirtuin Signaling Pathway	1.85	0.0997	-2.6	ABCA1	ATP binding cassette subfamily A member 1	Plasma Membrane	transporter	8.34247e-08	3.47647e-09	down	1.82485	-1.82485	-0.86778
Sirtuin Signaling Pathway	1.85	0.0997	-2.6	MTOR	mechanistic target of rapamycin	Nucleus	kinase	2.15174e-08	6.28984e-10	up	1.65752	1.65752	0.729023
Sirtuin Signaling Pathway	1.85	0.0997	-2.6	WRN	Werner syndrome RecQ like helicase	Nucleus	enzyme	2.66649e-06	2.35568e-07	down	1.5509	-1.5509	-0.633107
Sirtuin Signaling Pathway	1.85	0.0997	-2.6	PCK2	phosphoenolpyruvate carboxykinase 2, mitochondrial	Cytoplasm	kinase	2.2713e-08	6.77225e-10	down	2.03147	-2.03147	-1.02253
Sirtuin Signaling Pathway	1.85	0.0997	-2.6	H1FX	H1 histone family member X	Nucleus	other	1.68506e-10	1.05887e-12	down	1.62941	-1.62941	-0.704347
Sirtuin Signaling Pathway	1.85	0.0997	-2.6	MAPK3	mitogen-activated protein kinase 3	Cytoplasm	kinase	4.35448e-07	2.63697e-08	down	1.70674	-1.70674	-0.77124
Sirtuin Signaling Pathway	1.85	0.0997	-2.6	GABARAPL1	GABA type A receptor associated protein like 1	Cytoplasm	other	6.98211e-07	4.7128e-08	down	1.59593	-1.59593	-0.674393
Sirtuin Signaling Pathway	1.85	0.0997	-2.6	FOXO3	forkhead box O3	Nucleus	transcription regulator	6.36945e-09	1.34477e-10	down	1.57783	-1.57783	-0.657943
Sirtuin Signaling Pathway	1.85	0.0997	-2.6	PRKAA2	protein kinase AMP-activated catalytic subunit alpha 2	Cytoplasm	kinase	2.10783e-08	6.11859e-10	up	2.56896	2.56896	1.36119
Sirtuin Signaling Pathway	1.85	0.0997	-2.6	CLOCK	clock circadian regulator	Nucleus	transcription regulator	6.59993e-06	6.93289e-07	down	1.58261	-1.58261	-0.662307
Sirtuin Signaling Pathway	1.85	0.0997	-2.6	ATG4A	autophagy related 4A cysteine peptidase	Cytoplasm	peptidase	2.42197e-06	2.09436e-07	up	1.51877	1.51877	0.6029
Sirtuin Signaling Pathway	1.85	0.0997	-2.6	NDUFS2	NADH:ubiquinone oxidoreductase core subunit S2	Cytoplasm	enzyme	2.73026e-09	4.62603e-11	up	1.6227	1.6227	0.698393
Sirtuin Signaling Pathway	1.85	0.0997	-2.6	GSK3B	glycogen synthase kinase 3 beta	Nucleus	kinase	2.55367e-07	1.38835e-08	up	1.64288	1.64288	0.71623
Sirtuin Signaling Pathway	1.85	0.0997	-2.6	NFE2L2	nuclear factor, erythroid 2 like 2	Nucleus	transcription regulator	9.69282e-10	1.14172e-11	down	1.50069	-1.50069	-0.585623
Sirtuin Signaling Pathway	1.85	0.0997	-2.6	POLR1D	RNA polymerase I subunit D	Nucleus	enzyme	1.00509e-10	5.31682e-13	down	2.41623	-2.41623	-1.27276
Sirtuin Signaling Pathway	1.85	0.0997	-2.6	ATG5	autophagy related 5	Cytoplasm	other	1.82849e-08	5.14955e-10	down	2.53426	-2.53426	-1.34157
Sirtuin Signaling Pathway	1.85	0.0997	-2.6	NEDD4	neural precursor cell expressed, developmentally down-regulated 4, E3 ubiquitin protein ligase	Cytoplasm	enzyme	9.05081e-09	2.07464e-10	up	1.72618	1.72618	0.78758
Sirtuin Signaling Pathway	1.85	0.0997	-2.6	EPAS1	endothelial PAS domain protein 1	Nucleus	transcription regulator	9.89882e-07	7.20496e-08	down	1.57668	-1.57668	-0.656893
Sirtuin Signaling Pathway	1.85	0.0997	-2.6	TIMM44	translocase of inner mitochondrial membrane 44	Cytoplasm	transporter	3.83131e-08	1.30368e-09	up	1.61653	1.61653	0.6929
Sirtuin Signaling Pathway	1.85	0.0997	-2.6	NDUFS7	NADH:ubiquinone oxidoreductase core subunit S7	Cytoplasm	enzyme	2.84745e-05	3.88295e-06	up	1.60277	1.60277	0.680563
Sirtuin Signaling Pathway	1.85	0.0997	-2.6	GLS	glutaminase	Cytoplasm	enzyme	6.21473e-07	4.07127e-08	up	2.46799	2.46799	1.30334
Sirtuin Signaling Pathway	1.85	0.0997	-2.6	TOMM20	translocase of outer mitochondrial membrane 20	Cytoplasm	transporter	8.73433e-10	1.0066e-11	up	1.60568	1.60568	0.683183
Sirtuin Signaling Pathway	1.85	0.0997	-2.6	NQO1	NAD(P)H quinone dehydrogenase 1	Cytoplasm	enzyme	1.84774e-10	1.1987e-12	down	1.6793	-1.6793	-0.74786
Sirtuin Signaling Pathway	1.85	0.0997	-2.6	MAPK6	mitogen-activated protein kinase 6	Cytoplasm	kinase	4.52212e-06	4.40282e-07	down	1.51355	-1.51355	-0.59794
Sirtuin Signaling Pathway	1.85	0.0997	-2.6	TIMM17A	translocase of inner mitochondrial membrane 17A	Cytoplasm	transporter	8.93981e-06	9.97759e-07	up	1.69076	1.69076	0.75767
Sirtuin Signaling Pathway	1.85	0.0997	-2.6	TUBA1A	tubulin alpha 1a	Cytoplasm	other	5.82833e-09	1.18918e-10	up	1.53405	1.53405	0.617343
Sirtuin Signaling Pathway	1.85	0.0997	-2.6	H3F3A/H3F3B	H3 histone family member 3A	Nucleus	other	9.30595e-12	1.75195e-14	down	2.3275	-2.3275	-1.21878
Sirtuin Signaling Pathway	1.85	0.0997	-2.6	FOXO1	forkhead box O1	Nucleus	transcription regulator	1.76954e-08	4.93401e-10	down	1.83353	-1.83353	-0.87462
Sirtuin Signaling Pathway	1.85	0.0997	-2.6	CPS1	carbamoyl-phosphate synthase 1	Cytoplasm	enzyme	1.89706e-07	9.62841e-09	down	1.65176	-1.65176	-0.724003
Leucine Degradation I	1.77	0.333	NaN	BCAT1	branched chain amino acid transaminase 1	Cytoplasm	enzyme	9.96008e-10	1.18588e-11	down	1.69074	-1.69074	-0.757657
Leucine Degradation I	1.77	0.333	NaN	AUH	AU RNA binding methylglutaconyl-CoA hydratase	Cytoplasm	enzyme	3.16775e-07	1.8036e-08	down	1.60631	-1.60631	-0.683753
Leucine Degradation I	1.77	0.333	NaN	ACADM	acyl-CoA dehydrogenase, C-4 to C-12 straight chain	Cytoplasm	enzyme	8.279e-05	1.3501e-05	up	1.50084	1.50084	0.58577
Folate Transformations I	1.77	0.333	NaN	MTHFR	methylenetetrahydrofolate reductase	Cytoplasm	enzyme	1.2585e-06	9.60512e-08	up	1.6312	1.6312	0.705933
Folate Transformations I	1.77	0.333	NaN	MTHFD2	methylenetetrahydrofolate dehydrogenase (NADP+ dependent) 2, methenyltetrahydrofolate cyclohydrolase	Cytoplasm	enzyme	5.945e-11	2.51067e-13	down	1.59492	-1.59492	-0.67348
Folate Transformations I	1.77	0.333	NaN	SHMT1	serine hydroxymethyltransferase 1	Cytoplasm	enzyme	4.34743e-10	3.78259e-12	up	1.72148	1.72148	0.783653
EIF2 Signaling	1.77	0.104	-1.807	EIF2AK4	eukaryotic translation initiation factor 2 alpha kinase 4	Cytoplasm	kinase	6.89608e-08	2.72812e-09	down	1.67975	-1.67975	-0.74825
EIF2 Signaling	1.77	0.104	-1.807	RPL22	ribosomal protein L22	Nucleus	other	5.43025e-12	5.40606e-15	down	2.16889	-2.16889	-1.11696
EIF2 Signaling	1.77	0.104	-1.807	ATF3	activating transcription factor 3	Nucleus	transcription regulator	2.70124e-08	8.45963e-10	down	2.02902	-2.02902	-1.02078
EIF2 Signaling	1.77	0.104	-1.807	PIK3C2A	phosphatidylinositol-4-phosphate 3-kinase catalytic subunit type 2 alpha	Cytoplasm	kinase	2.82584e-06	2.52843e-07	down	1.59286	-1.59286	-0.671617
EIF2 Signaling	1.77	0.104	-1.807	FGFR1	fibroblast growth factor receptor 1	Plasma Membrane	kinase	0.000247191	4.8071e-05	up	1.50868	1.50868	0.59329
EIF2 Signaling	1.77	0.104	-1.807	PDPK1	3-phosphoinositide dependent protein kinase 1	Cytoplasm	kinase	1.1086e-07	4.99204e-09	up	1.65403	1.65403	0.725987
EIF2 Signaling	1.77	0.104	-1.807	RPL7L1	ribosomal protein L7 like 1	Cytoplasm	transcription regulator	3.11255e-09	5.42421e-11	down	1.80019	-1.80019	-0.84815
EIF2 Signaling	1.77	0.104	-1.807	EIF2S1	eukaryotic translation initiation factor 2 subunit alpha	Cytoplasm	translation regulator	5.93614e-12	6.81658e-15	up	2.51784	2.51784	1.33219
EIF2 Signaling	1.77	0.104	-1.807	CCND1	cyclin D1	Nucleus	transcription regulator	6.00024e-10	5.95338e-12	down	2.30478	-2.30478	-1.20463
EIF2 Signaling	1.77	0.104	-1.807	EIF4E	eukaryotic translation initiation factor 4E	Cytoplasm	translation regulator	1.1558e-09	1.44963e-11	down	2.9448	-2.9448	-1.55817
EIF2 Signaling	1.77	0.104	-1.807	EIF2A	eukaryotic translation initiation factor 2A	Cytoplasm	translation regulator	2.26999e-09	3.62744e-11	up	1.62442	1.62442	0.699923
EIF2 Signaling	1.77	0.104	-1.807	EIF2S2	eukaryotic translation initiation factor 2 subunit beta	Cytoplasm	translation regulator	1.22209e-10	7.0062e-13	down	2.37305	-2.37305	-1.24674
EIF2 Signaling	1.77	0.104	-1.807	PIK3R3	phosphoinositide-3-kinase regulatory subunit 3	Cytoplasm	kinase	8.33611e-08	3.4717e-09	down	1.6323	-1.6323	-0.706907
EIF2 Signaling	1.77	0.104	-1.807	MAPK3	mitogen-activated protein kinase 3	Cytoplasm	kinase	4.35448e-07	2.63697e-08	down	1.70674	-1.70674	-0.77124
EIF2 Signaling	1.77	0.104	-1.807	PAIP1	poly(A) binding protein interacting protein 1	Cytoplasm	translation regulator	2.76333e-11	8.64704e-14	up	3.7732	3.7732	1.91579
EIF2 Signaling	1.77	0.104	-1.807	EIF5	eukaryotic translation initiation factor 5	Cytoplasm	translation regulator	1.80872e-12	1.26014e-15	up	2.0487	2.0487	1.03471
EIF2 Signaling	1.77	0.104	-1.807	EIF2B1	eukaryotic translation initiation factor 2B subunit alpha	Cytoplasm	translation regulator	1.06938e-07	4.77877e-09	up	1.5176	1.5176	0.60179
EIF2 Signaling	1.77	0.104	-1.807	AKT3	AKT serine/threonine kinase 3	Cytoplasm	kinase	6.87797e-06	7.27745e-07	down	1.6577	-1.6577	-0.72918
EIF2 Signaling	1.77	0.104	-1.807	RPL37	ribosomal protein L37	Cytoplasm	other	1.15624e-06	8.69233e-08	down	1.5107	-1.5107	-0.595213
EIF2 Signaling	1.77	0.104	-1.807	GSK3B	glycogen synthase kinase 3 beta	Nucleus	kinase	2.55367e-07	1.38835e-08	up	1.64288	1.64288	0.71623
EIF2 Signaling	1.77	0.104	-1.807	RPS2	ribosomal protein S2	Cytoplasm	other	9.89882e-07	7.20382e-08	up	1.50996	1.50996	0.594513
EIF2 Signaling	1.77	0.104	-1.807	AGO1	argonaute 1, RISC catalytic component	Cytoplasm	translation regulator	1.78782e-09	2.6335e-11	down	1.78921	-1.78921	-0.839327
EIF2 Signaling	1.77	0.104	-1.807	AGO4	argonaute 4, RISC catalytic component	Cytoplasm	translation regulator	2.81612e-05	3.82796e-06	down	1.7371	-1.7371	-0.796677
IL-8 Signaling	1.76	0.107	-2.183	GNG4	G protein subunit gamma 4	Plasma Membrane	enzyme	2.89549e-05	3.96899e-06	down	1.50766	-1.50766	-0.592307
IL-8 Signaling	1.76	0.107	-2.183	NAPEPLD	N-acyl phosphatidylethanolamine phospholipase D	Cytoplasm	enzyme	4.04913e-07	2.41565e-08	down	1.70998	-1.70998	-0.773983
IL-8 Signaling	1.76	0.107	-2.183	PIK3C2A	phosphatidylinositol-4-phosphate 3-kinase catalytic subunit type 2 alpha	Cytoplasm	kinase	2.82584e-06	2.52843e-07	down	1.59286	-1.59286	-0.671617
IL-8 Signaling	1.76	0.107	-2.183	FGFR1	fibroblast growth factor receptor 1	Plasma Membrane	kinase	0.000247191	4.8071e-05	up	1.50868	1.50868	0.59329
IL-8 Signaling	1.76	0.107	-2.183	GNB5	G protein subunit beta 5	Plasma Membrane	enzyme	3.71155e-06	3.49654e-07	down	1.5287	-1.5287	-0.612307
IL-8 Signaling	1.76	0.107	-2.183	VEGFC	vascular endothelial growth factor C	Extracellular Space	growth factor	3.58259e-08	1.19581e-09	down	1.61553	-1.61553	-0.692007
IL-8 Signaling	1.76	0.107	-2.183	CCND1	cyclin D1	Nucleus	transcription regulator	6.00024e-10	5.95338e-12	down	2.30478	-2.30478	-1.20463
IL-8 Signaling	1.76	0.107	-2.183	ITGB3	integrin subunit beta 3	Plasma Membrane	transmembrane receptor	2.10739e-06	1.77301e-07	down	1.98681	-1.98681	-0.990453
IL-8 Signaling	1.76	0.107	-2.183	IRAK1	interleukin 1 receptor associated kinase 1	Plasma Membrane	kinase	8.27246e-10	9.38641e-12	up	1.94638	1.94638	0.960793
IL-8 Signaling	1.76	0.107	-2.183	PIK3R3	phosphoinositide-3-kinase regulatory subunit 3	Cytoplasm	kinase	8.33611e-08	3.4717e-09	down	1.6323	-1.6323	-0.706907
IL-8 Signaling	1.76	0.107	-2.183	RAB11FIP2	RAB11 family interacting protein 2	Cytoplasm	other	1.3732e-09	1.86555e-11	down	2.34513	-2.34513	-1.22967
IL-8 Signaling	1.76	0.107	-2.183	GNB4	G protein subunit beta 4	Plasma Membrane	enzyme	2.91359e-06	2.6225e-07	down	1.9306	-1.9306	-0.949047
IL-8 Signaling	1.76	0.107	-2.183	GNAI3	G protein subunit alpha i3	Cytoplasm	enzyme	1.09582e-07	4.92056e-09	down	1.51852	-1.51852	-0.602667
IL-8 Signaling	1.76	0.107	-2.183	MTOR	mechanistic target of rapamycin	Nucleus	kinase	2.15174e-08	6.28984e-10	up	1.65752	1.65752	0.729023
IL-8 Signaling	1.76	0.107	-2.183	CCND2	cyclin D2	Nucleus	other	1.86059e-07	9.41018e-09	down	2.07703	-2.07703	-1.05452
IL-8 Signaling	1.76	0.107	-2.183	MAPK3	mitogen-activated protein kinase 3	Cytoplasm	kinase	4.35448e-07	2.63697e-08	down	1.70674	-1.70674	-0.77124
IL-8 Signaling	1.76	0.107	-2.183	PRKCE	protein kinase C epsilon	Cytoplasm	kinase	5.22833e-10	4.84166e-12	down	2.01678	-2.01678	-1.01205
IL-8 Signaling	1.76	0.107	-2.183	AKT3	AKT serine/threonine kinase 3	Cytoplasm	kinase	6.87797e-06	7.27745e-07	down	1.6577	-1.6577	-0.72918
IL-8 Signaling	1.76	0.107	-2.183	PTGS2	prostaglandin-endoperoxide synthase 2	Cytoplasm	enzyme	7.99585e-06	8.7125e-07	down	1.80716	-1.80716	-0.853727
IL-8 Signaling	1.76	0.107	-2.183	FNBP1	formin binding protein 1	Nucleus	enzyme	1.3572e-06	1.05504e-07	up	1.82302	1.82302	0.866333
IL-8 Signaling	1.76	0.107	-2.183	EGFR	epidermal growth factor receptor	Plasma Membrane	kinase	7.80544e-08	3.18516e-09	down	1.65723	-1.65723	-0.728773
Docosahexaenoic Acid (DHA) Signaling	1.74	0.154	NaN	PIK3R3	phosphoinositide-3-kinase regulatory subunit 3	Cytoplasm	kinase	8.33611e-08	3.4717e-09	down	1.6323	-1.6323	-0.706907
Docosahexaenoic Acid (DHA) Signaling	1.74	0.154	NaN	BAD	BCL2 associated agonist of cell death	Cytoplasm	other	1.34915e-08	3.45293e-10	up	1.5081	1.5081	0.59273
Docosahexaenoic Acid (DHA) Signaling	1.74	0.154	NaN	FOXO1	forkhead box O1	Nucleus	transcription regulator	1.76954e-08	4.93401e-10	down	1.83353	-1.83353	-0.87462
Docosahexaenoic Acid (DHA) Signaling	1.74	0.154	NaN	PIK3C2A	phosphatidylinositol-4-phosphate 3-kinase catalytic subunit type 2 alpha	Cytoplasm	kinase	2.82584e-06	2.52843e-07	down	1.59286	-1.59286	-0.671617
Docosahexaenoic Acid (DHA) Signaling	1.74	0.154	NaN	FGFR1	fibroblast growth factor receptor 1	Plasma Membrane	kinase	0.000247191	4.8071e-05	up	1.50868	1.50868	0.59329
Docosahexaenoic Acid (DHA) Signaling	1.74	0.154	NaN	AKT3	AKT serine/threonine kinase 3	Cytoplasm	kinase	6.87797e-06	7.27745e-07	down	1.6577	-1.6577	-0.72918
Docosahexaenoic Acid (DHA) Signaling	1.74	0.154	NaN	PDPK1	3-phosphoinositide dependent protein kinase 1	Cytoplasm	kinase	1.1086e-07	4.99204e-09	up	1.65403	1.65403	0.725987
Docosahexaenoic Acid (DHA) Signaling	1.74	0.154	NaN	GSK3B	glycogen synthase kinase 3 beta	Nucleus	kinase	2.55367e-07	1.38835e-08	up	1.64288	1.64288	0.71623
Estrogen Receptor Signaling	1.73	0.117	NaN	POLR2I	RNA polymerase II subunit I	Nucleus	transcription regulator	5.00112e-11	1.85759e-13	up	1.70927	1.70927	0.77338
Estrogen Receptor Signaling	1.73	0.117	NaN	MED20	mediator complex subunit 20	Nucleus	transcription regulator	3.63817e-08	1.2206e-09	down	1.61798	-1.61798	-0.694197
Estrogen Receptor Signaling	1.73	0.117	NaN	MED1	mediator complex subunit 1	Nucleus	transcription regulator	1.04596e-07	4.63012e-09	down	1.53385	-1.53385	-0.61716
Estrogen Receptor Signaling	1.73	0.117	NaN	HNRNPD	heterogeneous nuclear ribonucleoprotein D	Nucleus	transcription regulator	3.62019e-08	1.21217e-09	down	1.54159	-1.54159	-0.624423
Estrogen Receptor Signaling	1.73	0.117	NaN	TAF13	TATA-box binding protein associated factor 13	Nucleus	transcription regulator	1.82252e-06	1.49995e-07	up	1.92033	1.92033	0.941357
Estrogen Receptor Signaling	1.73	0.117	NaN	NR3C1	nuclear receptor subfamily 3 group C member 1	Nucleus	ligand-dependent nuclear receptor	5.79647e-07	3.75903e-08	down	1.57858	-1.57858	-0.65863
Estrogen Receptor Signaling	1.73	0.117	NaN	NCOA3	nuclear receptor coactivator 3	Nucleus	transcription regulator	4.90343e-08	1.8001e-09	up	2.10338	2.10338	1.07271
Estrogen Receptor Signaling	1.73	0.117	NaN	H3F3A/H3F3B	H3 histone family member 3A	Nucleus	other	9.30595e-12	1.75195e-14	down	2.3275	-2.3275	-1.21878
Estrogen Receptor Signaling	1.73	0.117	NaN	PCK2	phosphoenolpyruvate carboxykinase 2, mitochondrial	Cytoplasm	kinase	2.2713e-08	6.77225e-10	down	2.03147	-2.03147	-1.02253
Estrogen Receptor Signaling	1.73	0.117	NaN	TAF5	TATA-box binding protein associated factor 5	Nucleus	transcription regulator	6.82206e-07	4.56459e-08	down	1.55999	-1.55999	-0.64154
Estrogen Receptor Signaling	1.73	0.117	NaN	RUNX2	runt related transcription factor 2	Nucleus	transcription regulator	2.44957e-06	2.12071e-07	down	1.71705	-1.71705	-0.77993
Estrogen Receptor Signaling	1.73	0.117	NaN	MAPK3	mitogen-activated protein kinase 3	Cytoplasm	kinase	4.35448e-07	2.63697e-08	down	1.70674	-1.70674	-0.77124
Estrogen Receptor Signaling	1.73	0.117	NaN	GTF2H5	general transcription factor IIH subunit 5	Nucleus	other	4.80301e-06	4.74716e-07	down	1.68639	-1.68639	-0.75394
Estrogen Receptor Signaling	1.73	0.117	NaN	POLR2L	RNA polymerase II subunit L	Nucleus	enzyme	3.57128e-10	2.89831e-12	up	1.50329	1.50329	0.58812
Estrogen Receptor Signaling	1.73	0.117	NaN	GTF2H3	general transcription factor IIH subunit 3	Nucleus	transcription regulator	4.87575e-05	7.28875e-06	up	1.58991	1.58991	0.668947
Axonal Guidance Signaling	1.72	0.0907	NaN	PRKACB	protein kinase cAMP-activated catalytic subunit beta	Cytoplasm	kinase	3.85749e-08	1.31897e-09	down	2.07728	-2.07728	-1.0547
Axonal Guidance Signaling	1.72	0.0907	NaN	ERAP2	endoplasmic reticulum aminopeptidase 2	Cytoplasm	peptidase	3.37928e-05	4.73703e-06	down	1.50114	-1.50114	-0.586057
Axonal Guidance Signaling	1.72	0.0907	NaN	GLI2	GLI family zinc finger 2	Nucleus	transcription regulator	1.94255e-05	2.48385e-06	down	1.5497	-1.5497	-0.631987
Axonal Guidance Signaling	1.72	0.0907	NaN	MMP3	matrix metallopeptidase 3	Extracellular Space	peptidase	4.25291e-06	4.11366e-07	down	2.59578	-2.59578	-1.37617
Axonal Guidance Signaling	1.72	0.0907	NaN	NTN4	netrin 4	Extracellular Space	other	0.000152932	2.75501e-05	up	1.52919	1.52919	0.612767
Axonal Guidance Signaling	1.72	0.0907	NaN	WNT3	Wnt family member 3	Extracellular Space	other	1.4617e-05	1.78124e-06	down	1.50754	-1.50754	-0.5922
Axonal Guidance Signaling	1.72	0.0907	NaN	NFATC3	nuclear factor of activated T-cells 3	Nucleus	transcription regulator	2.44288e-06	2.1143e-07	down	1.71021	-1.71021	-0.77417
Axonal Guidance Signaling	1.72	0.0907	NaN	WASL	Wiskott-Aldrich syndrome like	Cytoplasm	other	9.38587e-08	4.01634e-09	up	1.60073	1.60073	0.678733
Axonal Guidance Signaling	1.72	0.0907	NaN	GNA11	G protein subunit alpha 11	Plasma Membrane	enzyme	4.84133e-08	1.76622e-09	up	1.59017	1.59017	0.669177
Axonal Guidance Signaling	1.72	0.0907	NaN	GNB5	G protein subunit beta 5	Plasma Membrane	enzyme	3.71155e-06	3.49654e-07	down	1.5287	-1.5287	-0.612307
Axonal Guidance Signaling	1.72	0.0907	NaN	CRK	CRK proto-oncogene, adaptor protein	Cytoplasm	other	2.44547e-11	7.27911e-14	down	1.87964	-1.87964	-0.91046
Axonal Guidance Signaling	1.72	0.0907	NaN	NGF	nerve growth factor	Extracellular Space	growth factor	3.4574e-09	6.13073e-11	down	2.06288	-2.06288	-1.04466
Axonal Guidance Signaling	1.72	0.0907	NaN	EIF4E	eukaryotic translation initiation factor 4E	Cytoplasm	translation regulator	1.1558e-09	1.44963e-11	down	2.9448	-2.9448	-1.55817
Axonal Guidance Signaling	1.72	0.0907	NaN	GNB4	G protein subunit beta 4	Plasma Membrane	enzyme	2.91359e-06	2.6225e-07	down	1.9306	-1.9306	-0.949047
Axonal Guidance Signaling	1.72	0.0907	NaN	CFL2	cofilin 2	Extracellular Space	other	1.08471e-11	2.31805e-14	down	2.63909	-2.63909	-1.40004
Axonal Guidance Signaling	1.72	0.0907	NaN	SDC2	syndecan 2	Plasma Membrane	other	4.83968e-10	4.38326e-12	up	2.19518	2.19518	1.13434
Axonal Guidance Signaling	1.72	0.0907	NaN	MAPK3	mitogen-activated protein kinase 3	Cytoplasm	kinase	4.35448e-07	2.63697e-08	down	1.70674	-1.70674	-0.77124
Axonal Guidance Signaling	1.72	0.0907	NaN	PRKCE	protein kinase C epsilon	Cytoplasm	kinase	5.22833e-10	4.84166e-12	down	2.01678	-2.01678	-1.01205
Axonal Guidance Signaling	1.72	0.0907	NaN	AKT3	AKT serine/threonine kinase 3	Cytoplasm	kinase	6.87797e-06	7.27745e-07	down	1.6577	-1.6577	-0.72918
Axonal Guidance Signaling	1.72	0.0907	NaN	GSK3B	glycogen synthase kinase 3 beta	Nucleus	kinase	2.55367e-07	1.38835e-08	up	1.64288	1.64288	0.71623
Axonal Guidance Signaling	1.72	0.0907	NaN	GNG4	G protein subunit gamma 4	Plasma Membrane	enzyme	2.89549e-05	3.96899e-06	down	1.50766	-1.50766	-0.592307
Axonal Guidance Signaling	1.72	0.0907	NaN	ACTR2	ARP2 actin related protein 2 homolog	Plasma Membrane	other	4.47975e-11	1.56137e-13	down	2.38126	-2.38126	-1.25172
Axonal Guidance Signaling	1.72	0.0907	NaN	PAPPA	pappalysin 1	Extracellular Space	peptidase	2.98381e-07	1.67458e-08	down	1.8096	-1.8096	-0.85567
Axonal Guidance Signaling	1.72	0.0907	NaN	PIK3C2A	phosphatidylinositol-4-phosphate 3-kinase catalytic subunit type 2 alpha	Cytoplasm	kinase	2.82584e-06	2.52843e-07	down	1.59286	-1.59286	-0.671617
Axonal Guidance Signaling	1.72	0.0907	NaN	FGFR1	fibroblast growth factor receptor 1	Plasma Membrane	kinase	0.000247191	4.8071e-05	up	1.50868	1.50868	0.59329
Axonal Guidance Signaling	1.72	0.0907	NaN	ITGA2	integrin subunit alpha 2	Plasma Membrane	transmembrane receptor	1.38403e-07	6.53158e-09	up	1.86016	1.86016	0.895423
Axonal Guidance Signaling	1.72	0.0907	NaN	PRKAR2A	protein kinase cAMP-dependent type II regulatory subunit alpha	Cytoplasm	kinase	1.6572e-09	2.35652e-11	up	1.61798	1.61798	0.694197
Axonal Guidance Signaling	1.72	0.0907	NaN	ITGA5	integrin subunit alpha 5	Plasma Membrane	transmembrane receptor	2.35836e-10	1.66796e-12	down	2.56143	-2.56143	-1.35695
Axonal Guidance Signaling	1.72	0.0907	NaN	VEGFC	vascular endothelial growth factor C	Extracellular Space	growth factor	3.58259e-08	1.19581e-09	down	1.61553	-1.61553	-0.692007
Axonal Guidance Signaling	1.72	0.0907	NaN	RAP1A	RAP1A, member of RAS oncogene family	Cytoplasm	enzyme	1.35837e-14	3.45579e-19	down	2.46964	-2.46964	-1.3043
Axonal Guidance Signaling	1.72	0.0907	NaN	PDGFB	platelet derived growth factor subunit B	Extracellular Space	growth factor	7.58112e-09	1.67989e-10	down	1.56623	-1.56623	-0.647293
Axonal Guidance Signaling	1.72	0.0907	NaN	PIK3R3	phosphoinositide-3-kinase regulatory subunit 3	Cytoplasm	kinase	8.33611e-08	3.4717e-09	down	1.6323	-1.6323	-0.706907
Axonal Guidance Signaling	1.72	0.0907	NaN	MET	MET proto-oncogene, receptor tyrosine kinase	Plasma Membrane	kinase	1.12073e-05	1.2993e-06	down	1.5292	-1.5292	-0.61278
Axonal Guidance Signaling	1.72	0.0907	NaN	GNAI3	G protein subunit alpha i3	Cytoplasm	enzyme	1.09582e-07	4.92056e-09	down	1.51852	-1.51852	-0.602667
Axonal Guidance Signaling	1.72	0.0907	NaN	PRKAR2B	protein kinase cAMP-dependent type II regulatory subunit beta	Cytoplasm	kinase	1.11727e-05	1.29359e-06	up	1.57564	1.57564	0.655937
Axonal Guidance Signaling	1.72	0.0907	NaN	TUBA1A	tubulin alpha 1a	Cytoplasm	other	5.82833e-09	1.18918e-10	up	1.53405	1.53405	0.617343
Axonal Guidance Signaling	1.72	0.0907	NaN	CDC42	cell division cycle 42	Cytoplasm	enzyme	7.68247e-08	3.11153e-09	up	1.53845	1.53845	0.621477
Axonal Guidance Signaling	1.72	0.0907	NaN	NFATC2	nuclear factor of activated T-cells 2	Nucleus	transcription regulator	2.81161e-08	8.90543e-10	down	1.87801	-1.87801	-0.909203
Axonal Guidance Signaling	1.72	0.0907	NaN	EPHA2	EPH receptor A2	Plasma Membrane	kinase	7.7693e-09	1.7295e-10	down	1.5003	-1.5003	-0.585247
Axonal Guidance Signaling	1.72	0.0907	NaN	NRP1	neuropilin 1	Plasma Membrane	transmembrane receptor	2.55591e-08	7.86792e-10	down	2.34357	-2.34357	-1.22871
Axonal Guidance Signaling	1.72	0.0907	NaN	WNT5A	Wnt family member 5A	Extracellular Space	cytokine	1.19558e-06	9.04282e-08	down	1.68529	-1.68529	-0.752993
Chronic Myeloid Leukemia Signaling	1.71	0.123	NaN	HDAC9	histone deacetylase 9	Nucleus	transcription regulator	5.91691e-05	9.14022e-06	up	1.76391	1.76391	0.818777
Chronic Myeloid Leukemia Signaling	1.71	0.123	NaN	HDAC4	histone deacetylase 4	Nucleus	transcription regulator	3.86368e-06	3.6767e-07	down	1.71516	-1.71516	-0.778347
Chronic Myeloid Leukemia Signaling	1.71	0.123	NaN	PIK3C2A	phosphatidylinositol-4-phosphate 3-kinase catalytic subunit type 2 alpha	Cytoplasm	kinase	2.82584e-06	2.52843e-07	down	1.59286	-1.59286	-0.671617
Chronic Myeloid Leukemia Signaling	1.71	0.123	NaN	HDAC8	histone deacetylase 8	Nucleus	transcription regulator	7.9917e-07	5.57286e-08	down	1.8522	-1.8522	-0.889243
Chronic Myeloid Leukemia Signaling	1.71	0.123	NaN	BAD	BCL2 associated agonist of cell death	Cytoplasm	other	1.34915e-08	3.45293e-10	up	1.5081	1.5081	0.59273
Chronic Myeloid Leukemia Signaling	1.71	0.123	NaN	FGFR1	fibroblast growth factor receptor 1	Plasma Membrane	kinase	0.000247191	4.8071e-05	up	1.50868	1.50868	0.59329
Chronic Myeloid Leukemia Signaling	1.71	0.123	NaN	CDK6	cyclin dependent kinase 6	Nucleus	kinase	1.75382e-10	1.12439e-12	down	1.96768	-1.96768	-0.976497
Chronic Myeloid Leukemia Signaling	1.71	0.123	NaN	CRK	CRK proto-oncogene, adaptor protein	Cytoplasm	other	2.44547e-11	7.27911e-14	down	1.87964	-1.87964	-0.91046
Chronic Myeloid Leukemia Signaling	1.71	0.123	NaN	CCND1	cyclin D1	Nucleus	transcription regulator	6.00024e-10	5.95338e-12	down	2.30478	-2.30478	-1.20463
Chronic Myeloid Leukemia Signaling	1.71	0.123	NaN	PIK3R3	phosphoinositide-3-kinase regulatory subunit 3	Cytoplasm	kinase	8.33611e-08	3.4717e-09	down	1.6323	-1.6323	-0.706907
Chronic Myeloid Leukemia Signaling	1.71	0.123	NaN	MAPK3	mitogen-activated protein kinase 3	Cytoplasm	kinase	4.35448e-07	2.63697e-08	down	1.70674	-1.70674	-0.77124
Chronic Myeloid Leukemia Signaling	1.71	0.123	NaN	HDAC11	histone deacetylase 11	Nucleus	transcription regulator	2.48377e-07	1.3396e-08	up	1.67911	1.67911	0.7477
Chronic Myeloid Leukemia Signaling	1.71	0.123	NaN	AKT3	AKT serine/threonine kinase 3	Cytoplasm	kinase	6.87797e-06	7.27745e-07	down	1.6577	-1.6577	-0.72918
Oncostatin M Signaling	1.68	0.176	-2.236	IL6ST	interleukin 6 signal transducer	Plasma Membrane	transmembrane receptor	6.03046e-08	2.32431e-09	down	1.62111	-1.62111	-0.696983
Oncostatin M Signaling	1.68	0.176	-2.236	EPAS1	endothelial PAS domain protein 1	Nucleus	transcription regulator	9.89882e-07	7.20496e-08	down	1.57668	-1.57668	-0.656893
Oncostatin M Signaling	1.68	0.176	-2.236	JAK1	Janus kinase 1	Cytoplasm	kinase	1.06066e-06	7.81996e-08	down	1.54581	-1.54581	-0.62836
Oncostatin M Signaling	1.68	0.176	-2.236	MMP3	matrix metallopeptidase 3	Extracellular Space	peptidase	4.25291e-06	4.11366e-07	down	2.59578	-2.59578	-1.37617
Oncostatin M Signaling	1.68	0.176	-2.236	MAPK3	mitogen-activated protein kinase 3	Cytoplasm	kinase	4.35448e-07	2.63697e-08	down	1.70674	-1.70674	-0.77124
Oncostatin M Signaling	1.68	0.176	-2.236	OSMR	oncostatin M receptor	Plasma Membrane	transmembrane receptor	7.40141e-10	8.00264e-12	down	1.94477	-1.94477	-0.9596
Small Cell Lung Cancer Signaling	1.67	0.129	NaN	PIK3R3	phosphoinositide-3-kinase regulatory subunit 3	Cytoplasm	kinase	8.33611e-08	3.4717e-09	down	1.6323	-1.6323	-0.706907
Small Cell Lung Cancer Signaling	1.67	0.129	NaN	CCNE2	cyclin E2	Nucleus	other	2.45101e-09	4.01569e-11	down	1.80926	-1.80926	-0.855403
Small Cell Lung Cancer Signaling	1.67	0.129	NaN	PIK3C2A	phosphatidylinositol-4-phosphate 3-kinase catalytic subunit type 2 alpha	Cytoplasm	kinase	2.82584e-06	2.52843e-07	down	1.59286	-1.59286	-0.671617
Small Cell Lung Cancer Signaling	1.67	0.129	NaN	FGFR1	fibroblast growth factor receptor 1	Plasma Membrane	kinase	0.000247191	4.8071e-05	up	1.50868	1.50868	0.59329
Small Cell Lung Cancer Signaling	1.67	0.129	NaN	CDK6	cyclin dependent kinase 6	Nucleus	kinase	1.75382e-10	1.12439e-12	down	1.96768	-1.96768	-0.976497
Small Cell Lung Cancer Signaling	1.67	0.129	NaN	AKT3	AKT serine/threonine kinase 3	Cytoplasm	kinase	6.87797e-06	7.27745e-07	down	1.6577	-1.6577	-0.72918
Small Cell Lung Cancer Signaling	1.67	0.129	NaN	PTGS2	prostaglandin-endoperoxide synthase 2	Cytoplasm	enzyme	7.99585e-06	8.7125e-07	down	1.80716	-1.80716	-0.853727
Small Cell Lung Cancer Signaling	1.67	0.129	NaN	CCND1	cyclin D1	Nucleus	transcription regulator	6.00024e-10	5.95338e-12	down	2.30478	-2.30478	-1.20463
Small Cell Lung Cancer Signaling	1.67	0.129	NaN	TRAF1	TNF receptor associated factor 1	Cytoplasm	other	1.08271e-06	8.01834e-08	down	2.21403	-2.21403	-1.14667
Small Cell Lung Cancer Signaling	1.67	0.129	NaN	SKP2	S-phase kinase associated protein 2	Nucleus	enzyme	5.42465e-07	3.47364e-08	down	1.88081	-1.88081	-0.911357
Small Cell Lung Cancer Signaling	1.67	0.129	NaN	PTEN	phosphatase and tensin homolog	Cytoplasm	phosphatase	4.30522e-08	1.52354e-09	down	2.05755	-2.05755	-1.04093
Regulation of the Epithelial-Mesenchymal Transition Pathway	1.67	0.106	NaN	ETS1	ETS proto-oncogene 1, transcription factor	Nucleus	transcription regulator	7.6565e-11	3.63023e-13	down	1.5292	-1.5292	-0.612773
Regulation of the Epithelial-Mesenchymal Transition Pathway	1.67	0.106	NaN	SMAD2	SMAD family member 2	Nucleus	transcription regulator	1.4095e-06	1.10481e-07	up	1.52286	1.52286	0.606787
Regulation of the Epithelial-Mesenchymal Transition Pathway	1.67	0.106	NaN	LOX	lysyl oxidase	Extracellular Space	enzyme	1.31008e-08	3.32735e-10	down	3.0002	-3.0002	-1.58506
Regulation of the Epithelial-Mesenchymal Transition Pathway	1.67	0.106	NaN	JAK1	Janus kinase 1	Cytoplasm	kinase	1.06066e-06	7.81996e-08	down	1.54581	-1.54581	-0.62836
Regulation of the Epithelial-Mesenchymal Transition Pathway	1.67	0.106	NaN	WNT3	Wnt family member 3	Extracellular Space	other	1.4617e-05	1.78124e-06	down	1.50754	-1.50754	-0.5922
Regulation of the Epithelial-Mesenchymal Transition Pathway	1.67	0.106	NaN	PIK3C2A	phosphatidylinositol-4-phosphate 3-kinase catalytic subunit type 2 alpha	Cytoplasm	kinase	2.82584e-06	2.52843e-07	down	1.59286	-1.59286	-0.671617
Regulation of the Epithelial-Mesenchymal Transition Pathway	1.67	0.106	NaN	FGFR1	fibroblast growth factor receptor 1	Plasma Membrane	kinase	0.000247191	4.8071e-05	up	1.50868	1.50868	0.59329
Regulation of the Epithelial-Mesenchymal Transition Pathway	1.67	0.106	NaN	MET	MET proto-oncogene, receptor tyrosine kinase	Plasma Membrane	kinase	1.12073e-05	1.2993e-06	down	1.5292	-1.5292	-0.61278
Regulation of the Epithelial-Mesenchymal Transition Pathway	1.67	0.106	NaN	PIK3R3	phosphoinositide-3-kinase regulatory subunit 3	Cytoplasm	kinase	8.33611e-08	3.4717e-09	down	1.6323	-1.6323	-0.706907
Regulation of the Epithelial-Mesenchymal Transition Pathway	1.67	0.106	NaN	NOTCH2	notch 2	Plasma Membrane	transcription regulator	1.86366e-10	1.21377e-12	down	2.20278	-2.20278	-1.13932
Regulation of the Epithelial-Mesenchymal Transition Pathway	1.67	0.106	NaN	MAPK3	mitogen-activated protein kinase 3	Cytoplasm	kinase	4.35448e-07	2.63697e-08	down	1.70674	-1.70674	-0.77124
Regulation of the Epithelial-Mesenchymal Transition Pathway	1.67	0.106	NaN	ZEB2	zinc finger E-box binding homeobox 2	Nucleus	transcription regulator	3.8341e-05	5.50432e-06	down	1.58425	-1.58425	-0.6638
Regulation of the Epithelial-Mesenchymal Transition Pathway	1.67	0.106	NaN	APH1B	aph-1 homolog B, gamma-secretase subunit	Other	peptidase	2.06887e-08	5.98971e-10	down	1.88418	-1.88418	-0.91394
Regulation of the Epithelial-Mesenchymal Transition Pathway	1.67	0.106	NaN	AKT3	AKT serine/threonine kinase 3	Cytoplasm	kinase	6.87797e-06	7.27745e-07	down	1.6577	-1.6577	-0.72918
Regulation of the Epithelial-Mesenchymal Transition Pathway	1.67	0.106	NaN	GSK3B	glycogen synthase kinase 3 beta	Nucleus	kinase	2.55367e-07	1.38835e-08	up	1.64288	1.64288	0.71623
Regulation of the Epithelial-Mesenchymal Transition Pathway	1.67	0.106	NaN	JAG1	jagged 1	Extracellular Space	growth factor	2.48142e-08	7.55026e-10	down	1.86525	-1.86525	-0.89937
Regulation of the Epithelial-Mesenchymal Transition Pathway	1.67	0.106	NaN	HMGA2	high mobility group AT-hook 2	Nucleus	enzyme	5.74643e-14	2.92387e-18	down	3.53323	-3.53323	-1.82099
Regulation of the Epithelial-Mesenchymal Transition Pathway	1.67	0.106	NaN	MAP2K5	mitogen-activated protein kinase kinase 5	Cytoplasm	kinase	6.66854e-05	1.04964e-05	up	1.62147	1.62147	0.697307
Regulation of the Epithelial-Mesenchymal Transition Pathway	1.67	0.106	NaN	EGFR	epidermal growth factor receptor	Plasma Membrane	kinase	7.80544e-08	3.18516e-09	down	1.65723	-1.65723	-0.728773
Regulation of the Epithelial-Mesenchymal Transition Pathway	1.67	0.106	NaN	WNT5A	Wnt family member 5A	Extracellular Space	cytokine	1.19558e-06	9.04282e-08	down	1.68529	-1.68529	-0.752993
RAN Signaling	1.67	0.235	NaN	RCC1	regulator of chromosome condensation 1	Cytoplasm	other	1.08738e-07	4.86884e-09	up	3.54764	3.54764	1.82686
RAN Signaling	1.67	0.235	NaN	RAN	RAN, member RAS oncogene family	Nucleus	enzyme	1.0066e-11	1.99747e-14	up	2.10219	2.10219	1.07189
RAN Signaling	1.67	0.235	NaN	KPNA1	karyopherin subunit alpha 1	Nucleus	transporter	4.43632e-08	1.58686e-09	down	1.61623	-1.61623	-0.69263
RAN Signaling	1.67	0.235	NaN	IPO5	importin 5	Nucleus	transporter	2.01565e-08	5.8151e-10	down	1.87582	-1.87582	-0.90752
RAR Activation	1.65	0.105	NaN	PRKACB	protein kinase cAMP-activated catalytic subunit beta	Cytoplasm	kinase	3.85749e-08	1.31897e-09	down	2.07728	-2.07728	-1.0547
RAR Activation	1.65	0.105	NaN	SMAD2	SMAD family member 2	Nucleus	transcription regulator	1.4095e-06	1.10481e-07	up	1.52286	1.52286	0.606787
RAR Activation	1.65	0.105	NaN	MED1	mediator complex subunit 1	Nucleus	transcription regulator	1.04596e-07	4.63012e-09	down	1.53385	-1.53385	-0.61716
RAR Activation	1.65	0.105	NaN	PRKAR2A	protein kinase cAMP-dependent type II regulatory subunit alpha	Cytoplasm	kinase	1.6572e-09	2.35652e-11	up	1.61798	1.61798	0.694197
RAR Activation	1.65	0.105	NaN	SMAD6	SMAD family member 6	Nucleus	transcription regulator	0.000169527	3.1083e-05	down	1.53174	-1.53174	-0.615173
RAR Activation	1.65	0.105	NaN	SMARCE1	SWI/SNF related, matrix associated, actin dependent regulator of chromatin, subfamily e, member 1	Nucleus	transcription regulator	1.8058e-09	2.67377e-11	up	2.03758	2.03758	1.02685
RAR Activation	1.65	0.105	NaN	PDPK1	3-phosphoinositide dependent protein kinase 1	Cytoplasm	kinase	1.1086e-07	4.99204e-09	up	1.65403	1.65403	0.725987
RAR Activation	1.65	0.105	NaN	SMAD5	SMAD family member 5	Nucleus	transcription regulator	2.78306e-08	8.78668e-10	down	1.68691	-1.68691	-0.754387
RAR Activation	1.65	0.105	NaN	PTEN	phosphatase and tensin homolog	Cytoplasm	phosphatase	4.30522e-08	1.52354e-09	down	2.05755	-2.05755	-1.04093
RAR Activation	1.65	0.105	NaN	PIK3R3	phosphoinositide-3-kinase regulatory subunit 3	Cytoplasm	kinase	8.33611e-08	3.4717e-09	down	1.6323	-1.6323	-0.706907
RAR Activation	1.65	0.105	NaN	CSNK2A2	casein kinase 2 alpha 2	Cytoplasm	kinase	6.838e-06	7.22554e-07	up	1.75656	1.75656	0.812757
RAR Activation	1.65	0.105	NaN	PRKAR2B	protein kinase cAMP-dependent type II regulatory subunit beta	Cytoplasm	kinase	1.11727e-05	1.29359e-06	up	1.57564	1.57564	0.655937
RAR Activation	1.65	0.105	NaN	ALDH1A3	aldehyde dehydrogenase 1 family member A3	Cytoplasm	enzyme	1.82903e-07	9.23657e-09	up	1.57059	1.57059	0.651307
RAR Activation	1.65	0.105	NaN	SMARCA2	SWI/SNF related, matrix associated, actin dependent regulator of chromatin, subfamily a, member 2	Nucleus	transcription regulator	1.06045e-07	4.71855e-09	down	1.55412	-1.55412	-0.636097
RAR Activation	1.65	0.105	NaN	GTF2H5	general transcription factor IIH subunit 5	Nucleus	other	4.80301e-06	4.74716e-07	down	1.68639	-1.68639	-0.75394
RAR Activation	1.65	0.105	NaN	PRKCE	protein kinase C epsilon	Cytoplasm	kinase	5.22833e-10	4.84166e-12	down	2.01678	-2.01678	-1.01205
RAR Activation	1.65	0.105	NaN	AKT3	AKT serine/threonine kinase 3	Cytoplasm	kinase	6.87797e-06	7.27745e-07	down	1.6577	-1.6577	-0.72918
RAR Activation	1.65	0.105	NaN	SMARCC1	SWI/SNF related, matrix associated, actin dependent regulator of chromatin subfamily c member 1	Nucleus	transcription regulator	1.14545e-10	6.41563e-13	up	2.12213	2.12213	1.08551
RAR Activation	1.65	0.105	NaN	PHF10	PHD finger protein 10	Nucleus	other	1.25289e-09	1.64154e-11	up	2.33051	2.33051	1.22064
RAR Activation	1.65	0.105	NaN	GTF2H3	general transcription factor IIH subunit 3	Nucleus	transcription regulator	4.87575e-05	7.28875e-06	up	1.58991	1.58991	0.668947
Sertoli Cell-Sertoli Cell Junction Signaling	1.65	0.107	NaN	PRKACB	protein kinase cAMP-activated catalytic subunit beta	Cytoplasm	kinase	3.85749e-08	1.31897e-09	down	2.07728	-2.07728	-1.0547
Sertoli Cell-Sertoli Cell Junction Signaling	1.65	0.107	NaN	CLDN11	claudin 11	Plasma Membrane	other	1.77638e-07	8.9255e-09	down	1.5812	-1.5812	-0.661023
Sertoli Cell-Sertoli Cell Junction Signaling	1.65	0.107	NaN	EPN1	epsin 1	Plasma Membrane	other	9.85677e-12	1.88073e-14	up	1.92777	1.92777	0.94693
Sertoli Cell-Sertoli Cell Junction Signaling	1.65	0.107	NaN	TJP2	tight junction protein 2	Plasma Membrane	kinase	1.97025e-08	5.6641e-10	up	1.58858	1.58858	0.667733
Sertoli Cell-Sertoli Cell Junction Signaling	1.65	0.107	NaN	NECTIN3	nectin cell adhesion molecule 3	Plasma Membrane	other	5.27361e-10	4.91042e-12	down	2.21774	-2.21774	-1.14909
Sertoli Cell-Sertoli Cell Junction Signaling	1.65	0.107	NaN	ITGA2	integrin subunit alpha 2	Plasma Membrane	transmembrane receptor	1.38403e-07	6.53158e-09	up	1.86016	1.86016	0.895423
Sertoli Cell-Sertoli Cell Junction Signaling	1.65	0.107	NaN	PRKAR2A	protein kinase cAMP-dependent type II regulatory subunit alpha	Cytoplasm	kinase	1.6572e-09	2.35652e-11	up	1.61798	1.61798	0.694197
Sertoli Cell-Sertoli Cell Junction Signaling	1.65	0.107	NaN	ITGA5	integrin subunit alpha 5	Plasma Membrane	transmembrane receptor	2.35836e-10	1.66796e-12	down	2.56143	-2.56143	-1.35695
Sertoli Cell-Sertoli Cell Junction Signaling	1.65	0.107	NaN	PTEN	phosphatase and tensin homolog	Cytoplasm	phosphatase	4.30522e-08	1.52354e-09	down	2.05755	-2.05755	-1.04093
Sertoli Cell-Sertoli Cell Junction Signaling	1.65	0.107	NaN	TUBA1A	tubulin alpha 1a	Cytoplasm	other	5.82833e-09	1.18918e-10	up	1.53405	1.53405	0.617343
Sertoli Cell-Sertoli Cell Junction Signaling	1.65	0.107	NaN	PRKAR2B	protein kinase cAMP-dependent type II regulatory subunit beta	Cytoplasm	kinase	1.11727e-05	1.29359e-06	up	1.57564	1.57564	0.655937
Sertoli Cell-Sertoli Cell Junction Signaling	1.65	0.107	NaN	CLDN4	claudin 4	Plasma Membrane	transmembrane receptor	5.18744e-05	7.82861e-06	down	1.78455	-1.78455	-0.83556
Sertoli Cell-Sertoli Cell Junction Signaling	1.65	0.107	NaN	CDC42	cell division cycle 42	Cytoplasm	enzyme	7.68247e-08	3.11153e-09	up	1.53845	1.53845	0.621477
Sertoli Cell-Sertoli Cell Junction Signaling	1.65	0.107	NaN	CLDN1	claudin 1	Plasma Membrane	other	1.77171e-09	2.60526e-11	down	1.6058	-1.6058	-0.683297
Sertoli Cell-Sertoli Cell Junction Signaling	1.65	0.107	NaN	MAPK3	mitogen-activated protein kinase 3	Cytoplasm	kinase	4.35448e-07	2.63697e-08	down	1.70674	-1.70674	-0.77124
Sertoli Cell-Sertoli Cell Junction Signaling	1.65	0.107	NaN	MAP3K20	mitogen-activated protein kinase kinase kinase 20	Cytoplasm	kinase	2.35875e-05	3.11204e-06	down	2.05369	-2.05369	-1.03822
Sertoli Cell-Sertoli Cell Junction Signaling	1.65	0.107	NaN	AKT3	AKT serine/threonine kinase 3	Cytoplasm	kinase	6.87797e-06	7.27745e-07	down	1.6577	-1.6577	-0.72918
Sertoli Cell-Sertoli Cell Junction Signaling	1.65	0.107	NaN	GSK3B	glycogen synthase kinase 3 beta	Nucleus	kinase	2.55367e-07	1.38835e-08	up	1.64288	1.64288	0.71623
Sertoli Cell-Sertoli Cell Junction Signaling	1.65	0.107	NaN	VCL	vinculin	Plasma Membrane	enzyme	7.70988e-11	3.72676e-13	down	1.50646	-1.50646	-0.591167
14-3-3-mediated Signaling	1.64	0.115	-1.941	YWHAG	tyrosine 3-monooxygenase/tryptophan 5-monooxygenase activation protein gamma	Cytoplasm	other	3.50366e-08	1.1649e-09	down	1.75089	-1.75089	-0.808087
14-3-3-mediated Signaling	1.64	0.115	-1.941	PIK3C2A	phosphatidylinositol-4-phosphate 3-kinase catalytic subunit type 2 alpha	Cytoplasm	kinase	2.82584e-06	2.52843e-07	down	1.59286	-1.59286	-0.671617
14-3-3-mediated Signaling	1.64	0.115	-1.941	BAD	BCL2 associated agonist of cell death	Cytoplasm	other	1.34915e-08	3.45293e-10	up	1.5081	1.5081	0.59273
14-3-3-mediated Signaling	1.64	0.115	-1.941	FGFR1	fibroblast growth factor receptor 1	Plasma Membrane	kinase	0.000247191	4.8071e-05	up	1.50868	1.50868	0.59329
14-3-3-mediated Signaling	1.64	0.115	-1.941	STRADA	STE20-related kinase adaptor alpha	Nucleus	kinase	3.01112e-06	2.72809e-07	down	1.57676	-1.57676	-0.656963
14-3-3-mediated Signaling	1.64	0.115	-1.941	YWHAZ	tyrosine 3-monooxygenase/tryptophan 5-monooxygenase activation protein zeta	Cytoplasm	enzyme	2.82601e-10	2.16809e-12	down	1.5975	-1.5975	-0.67582
14-3-3-mediated Signaling	1.64	0.115	-1.941	PIK3R3	phosphoinositide-3-kinase regulatory subunit 3	Cytoplasm	kinase	8.33611e-08	3.4717e-09	down	1.6323	-1.6323	-0.706907
14-3-3-mediated Signaling	1.64	0.115	-1.941	SRPK2	SRSF protein kinase 2	Nucleus	kinase	5.57931e-11	2.25688e-13	down	2.82792	-2.82792	-1.49974
14-3-3-mediated Signaling	1.64	0.115	-1.941	TUBA1A	tubulin alpha 1a	Cytoplasm	other	5.82833e-09	1.18918e-10	up	1.53405	1.53405	0.617343
14-3-3-mediated Signaling	1.64	0.115	-1.941	FOXO1	forkhead box O1	Nucleus	transcription regulator	1.76954e-08	4.93401e-10	down	1.83353	-1.83353	-0.87462
14-3-3-mediated Signaling	1.64	0.115	-1.941	MAPK3	mitogen-activated protein kinase 3	Cytoplasm	kinase	4.35448e-07	2.63697e-08	down	1.70674	-1.70674	-0.77124
14-3-3-mediated Signaling	1.64	0.115	-1.941	PRKCE	protein kinase C epsilon	Cytoplasm	kinase	5.22833e-10	4.84166e-12	down	2.01678	-2.01678	-1.01205
14-3-3-mediated Signaling	1.64	0.115	-1.941	AKT3	AKT serine/threonine kinase 3	Cytoplasm	kinase	6.87797e-06	7.27745e-07	down	1.6577	-1.6577	-0.72918
14-3-3-mediated Signaling	1.64	0.115	-1.941	GSK3B	glycogen synthase kinase 3 beta	Nucleus	kinase	2.55367e-07	1.38835e-08	up	1.64288	1.64288	0.71623
14-3-3-mediated Signaling	1.64	0.115	-1.941	RPS6KA1	ribosomal protein S6 kinase A1	Cytoplasm	kinase	3.83157e-08	1.30677e-09	down	1.61813	-1.61813	-0.694327
FLT3 Signaling in Hematopoietic Progenitor Cells	1.64	0.128	-1.508	PIK3R3	phosphoinositide-3-kinase regulatory subunit 3	Cytoplasm	kinase	8.33611e-08	3.4717e-09	down	1.6323	-1.6323	-0.706907
FLT3 Signaling in Hematopoietic Progenitor Cells	1.64	0.128	-1.508	MTOR	mechanistic target of rapamycin	Nucleus	kinase	2.15174e-08	6.28984e-10	up	1.65752	1.65752	0.729023
FLT3 Signaling in Hematopoietic Progenitor Cells	1.64	0.128	-1.508	BAD	BCL2 associated agonist of cell death	Cytoplasm	other	1.34915e-08	3.45293e-10	up	1.5081	1.5081	0.59273
FLT3 Signaling in Hematopoietic Progenitor Cells	1.64	0.128	-1.508	PIK3C2A	phosphatidylinositol-4-phosphate 3-kinase catalytic subunit type 2 alpha	Cytoplasm	kinase	2.82584e-06	2.52843e-07	down	1.59286	-1.59286	-0.671617
FLT3 Signaling in Hematopoietic Progenitor Cells	1.64	0.128	-1.508	MAPK3	mitogen-activated protein kinase 3	Cytoplasm	kinase	4.35448e-07	2.63697e-08	down	1.70674	-1.70674	-0.77124
FLT3 Signaling in Hematopoietic Progenitor Cells	1.64	0.128	-1.508	FGFR1	fibroblast growth factor receptor 1	Plasma Membrane	kinase	0.000247191	4.8071e-05	up	1.50868	1.50868	0.59329
FLT3 Signaling in Hematopoietic Progenitor Cells	1.64	0.128	-1.508	AKT3	AKT serine/threonine kinase 3	Cytoplasm	kinase	6.87797e-06	7.27745e-07	down	1.6577	-1.6577	-0.72918
FLT3 Signaling in Hematopoietic Progenitor Cells	1.64	0.128	-1.508	PDPK1	3-phosphoinositide dependent protein kinase 1	Cytoplasm	kinase	1.1086e-07	4.99204e-09	up	1.65403	1.65403	0.725987
FLT3 Signaling in Hematopoietic Progenitor Cells	1.64	0.128	-1.508	RPS6KA1	ribosomal protein S6 kinase A1	Cytoplasm	kinase	3.83157e-08	1.30677e-09	down	1.61813	-1.61813	-0.694327
FLT3 Signaling in Hematopoietic Progenitor Cells	1.64	0.128	-1.508	CREB5	cAMP responsive element binding protein 5	Nucleus	transcription regulator	7.24769e-06	7.75162e-07	down	1.82782	-1.82782	-0.870123
FLT3 Signaling in Hematopoietic Progenitor Cells	1.64	0.128	-1.508	EIF4E	eukaryotic translation initiation factor 4E	Cytoplasm	translation regulator	1.1558e-09	1.44963e-11	down	2.9448	-2.9448	-1.55817
Glutathione Redox Reactions II	1.64	0.5	NaN	TXNDC12	thioredoxin domain containing 12	Cytoplasm	enzyme	1.02726e-08	2.43833e-10	down	1.52898	-1.52898	-0.61257
Glutathione Redox Reactions II	1.64	0.5	NaN	GLRX	glutaredoxin	Cytoplasm	enzyme	4.19474e-07	2.5245e-08	up	1.85399	1.85399	0.890637
Melanoma Signaling	1.61	0.145	NaN	PIK3R3	phosphoinositide-3-kinase regulatory subunit 3	Cytoplasm	kinase	8.33611e-08	3.4717e-09	down	1.6323	-1.6323	-0.706907
Melanoma Signaling	1.61	0.145	NaN	BAD	BCL2 associated agonist of cell death	Cytoplasm	other	1.34915e-08	3.45293e-10	up	1.5081	1.5081	0.59273
Melanoma Signaling	1.61	0.145	NaN	PIK3C2A	phosphatidylinositol-4-phosphate 3-kinase catalytic subunit type 2 alpha	Cytoplasm	kinase	2.82584e-06	2.52843e-07	down	1.59286	-1.59286	-0.671617
Melanoma Signaling	1.61	0.145	NaN	MAPK3	mitogen-activated protein kinase 3	Cytoplasm	kinase	4.35448e-07	2.63697e-08	down	1.70674	-1.70674	-0.77124
Melanoma Signaling	1.61	0.145	NaN	FGFR1	fibroblast growth factor receptor 1	Plasma Membrane	kinase	0.000247191	4.8071e-05	up	1.50868	1.50868	0.59329
Melanoma Signaling	1.61	0.145	NaN	AKT3	AKT serine/threonine kinase 3	Cytoplasm	kinase	6.87797e-06	7.27745e-07	down	1.6577	-1.6577	-0.72918
Melanoma Signaling	1.61	0.145	NaN	CCND1	cyclin D1	Nucleus	transcription regulator	6.00024e-10	5.95338e-12	down	2.30478	-2.30478	-1.20463
Melanoma Signaling	1.61	0.145	NaN	PTEN	phosphatase and tensin homolog	Cytoplasm	phosphatase	4.30522e-08	1.52354e-09	down	2.05755	-2.05755	-1.04093
α-Adrenergic Signaling	1.61	0.126	-1.414	PRKACB	protein kinase cAMP-activated catalytic subunit beta	Cytoplasm	kinase	3.85749e-08	1.31897e-09	down	2.07728	-2.07728	-1.0547
α-Adrenergic Signaling	1.61	0.126	-1.414	GNG4	G protein subunit gamma 4	Plasma Membrane	enzyme	2.89549e-05	3.96899e-06	down	1.50766	-1.50766	-0.592307
α-Adrenergic Signaling	1.61	0.126	-1.414	GNAI3	G protein subunit alpha i3	Cytoplasm	enzyme	1.09582e-07	4.92056e-09	down	1.51852	-1.51852	-0.602667
α-Adrenergic Signaling	1.61	0.126	-1.414	GNB4	G protein subunit beta 4	Plasma Membrane	enzyme	2.91359e-06	2.6225e-07	down	1.9306	-1.9306	-0.949047
α-Adrenergic Signaling	1.61	0.126	-1.414	PRKAR2B	protein kinase cAMP-dependent type II regulatory subunit beta	Cytoplasm	kinase	1.11727e-05	1.29359e-06	up	1.57564	1.57564	0.655937
α-Adrenergic Signaling	1.61	0.126	-1.414	MAPK3	mitogen-activated protein kinase 3	Cytoplasm	kinase	4.35448e-07	2.63697e-08	down	1.70674	-1.70674	-0.77124
α-Adrenergic Signaling	1.61	0.126	-1.414	PRKAR2A	protein kinase cAMP-dependent type II regulatory subunit alpha	Cytoplasm	kinase	1.6572e-09	2.35652e-11	up	1.61798	1.61798	0.694197
α-Adrenergic Signaling	1.61	0.126	-1.414	GNB5	G protein subunit beta 5	Plasma Membrane	enzyme	3.71155e-06	3.49654e-07	down	1.5287	-1.5287	-0.612307
α-Adrenergic Signaling	1.61	0.126	-1.414	PRKCE	protein kinase C epsilon	Cytoplasm	kinase	5.22833e-10	4.84166e-12	down	2.01678	-2.01678	-1.01205
α-Adrenergic Signaling	1.61	0.126	-1.414	PYGL	glycogen phosphorylase L	Cytoplasm	enzyme	2.65184e-08	8.23747e-10	up	1.50451	1.50451	0.589293
α-Adrenergic Signaling	1.61	0.126	-1.414	SLC8A1	solute carrier family 8 member A1	Plasma Membrane	transporter	2.04622e-08	5.91891e-10	down	2.18154	-2.18154	-1.12535
PPARα/RXRα Activation	1.61	0.106	1	PRKACB	protein kinase cAMP-activated catalytic subunit beta	Cytoplasm	kinase	3.85749e-08	1.31897e-09	down	2.07728	-2.07728	-1.0547
PPARα/RXRα Activation	1.61	0.106	1	SMAD2	SMAD family member 2	Nucleus	transcription regulator	1.4095e-06	1.10481e-07	up	1.52286	1.52286	0.606787
PPARα/RXRα Activation	1.61	0.106	1	MED1	mediator complex subunit 1	Nucleus	transcription regulator	1.04596e-07	4.63012e-09	down	1.53385	-1.53385	-0.61716
PPARα/RXRα Activation	1.61	0.106	1	GNA11	G protein subunit alpha 11	Plasma Membrane	enzyme	4.84133e-08	1.76622e-09	up	1.59017	1.59017	0.669177
PPARα/RXRα Activation	1.61	0.106	1	PRKAR2A	protein kinase cAMP-dependent type II regulatory subunit alpha	Cytoplasm	kinase	1.6572e-09	2.35652e-11	up	1.61798	1.61798	0.694197
PPARα/RXRα Activation	1.61	0.106	1	ADIPOR1	adiponectin receptor 1	Plasma Membrane	transmembrane receptor	6.33052e-10	6.44213e-12	down	2.15938	-2.15938	-1.11062
PPARα/RXRα Activation	1.61	0.106	1	ABCA1	ATP binding cassette subfamily A member 1	Plasma Membrane	transporter	8.34247e-08	3.47647e-09	down	1.82485	-1.82485	-0.86778
PPARα/RXRα Activation	1.61	0.106	1	NCOA3	nuclear receptor coactivator 3	Nucleus	transcription regulator	4.90343e-08	1.8001e-09	up	2.10338	2.10338	1.07271
PPARα/RXRα Activation	1.61	0.106	1	CAND1	cullin associated and neddylation dissociated 1	Cytoplasm	transcription regulator	1.03571e-07	4.56105e-09	down	1.67755	-1.67755	-0.74636
PPARα/RXRα Activation	1.61	0.106	1	PRKAR2B	protein kinase cAMP-dependent type II regulatory subunit beta	Cytoplasm	kinase	1.11727e-05	1.29359e-06	up	1.57564	1.57564	0.655937
PPARα/RXRα Activation	1.61	0.106	1	GHR	growth hormone receptor	Plasma Membrane	transmembrane receptor	8.7072e-06	9.66925e-07	down	1.55949	-1.55949	-0.641077
PPARα/RXRα Activation	1.61	0.106	1	GPD2	glycerol-3-phosphate dehydrogenase 2	Cytoplasm	enzyme	4.44212e-11	1.53695e-13	down	2.28787	-2.28787	-1.194
PPARα/RXRα Activation	1.61	0.106	1	MAPK3	mitogen-activated protein kinase 3	Cytoplasm	kinase	4.35448e-07	2.63697e-08	down	1.70674	-1.70674	-0.77124
PPARα/RXRα Activation	1.61	0.106	1	CLOCK	clock circadian regulator	Nucleus	transcription regulator	6.59993e-06	6.93289e-07	down	1.58261	-1.58261	-0.662307
PPARα/RXRα Activation	1.61	0.106	1	PRKAA2	protein kinase AMP-activated catalytic subunit alpha 2	Cytoplasm	kinase	2.10783e-08	6.11859e-10	up	2.56896	2.56896	1.36119
PPARα/RXRα Activation	1.61	0.106	1	HSP90AA1	heat shock protein 90 alpha family class A member 1	Cytoplasm	enzyme	7.40107e-10	7.894e-12	up	1.62731	1.62731	0.70249
PPARα/RXRα Activation	1.61	0.106	1	ADIPOR2	adiponectin receptor 2	Plasma Membrane	transmembrane receptor	1.58145e-11	4.02333e-14	up	2.13019	2.13019	1.09098
PPARα/RXRα Activation	1.61	0.106	1	IL1RAP	interleukin 1 receptor accessory protein	Plasma Membrane	transmembrane receptor	5.40659e-07	3.4586e-08	down	2.1287	-2.1287	-1.08997
PPARα/RXRα Activation	1.61	0.106	1	ACVR2A	activin A receptor type 2A	Plasma Membrane	kinase	3.43638e-05	4.83717e-06	down	1.60096	-1.60096	-0.678933
Role of NFAT in Cardiac Hypertrophy	1.59	0.104	NaN	GNG4	G protein subunit gamma 4	Plasma Membrane	enzyme	2.89549e-05	3.96899e-06	down	1.50766	-1.50766	-0.592307
Role of NFAT in Cardiac Hypertrophy	1.59	0.104	NaN	IL6ST	interleukin 6 signal transducer	Plasma Membrane	transmembrane receptor	6.03046e-08	2.32431e-09	down	1.62111	-1.62111	-0.696983
Role of NFAT in Cardiac Hypertrophy	1.59	0.104	NaN	PRKACB	protein kinase cAMP-activated catalytic subunit beta	Cytoplasm	kinase	3.85749e-08	1.31897e-09	down	2.07728	-2.07728	-1.0547
Role of NFAT in Cardiac Hypertrophy	1.59	0.104	NaN	HDAC9	histone deacetylase 9	Nucleus	transcription regulator	5.91691e-05	9.14022e-06	up	1.76391	1.76391	0.818777
Role of NFAT in Cardiac Hypertrophy	1.59	0.104	NaN	HDAC4	histone deacetylase 4	Nucleus	transcription regulator	3.86368e-06	3.6767e-07	down	1.71516	-1.71516	-0.778347
Role of NFAT in Cardiac Hypertrophy	1.59	0.104	NaN	PIK3C2A	phosphatidylinositol-4-phosphate 3-kinase catalytic subunit type 2 alpha	Cytoplasm	kinase	2.82584e-06	2.52843e-07	down	1.59286	-1.59286	-0.671617
Role of NFAT in Cardiac Hypertrophy	1.59	0.104	NaN	HDAC8	histone deacetylase 8	Nucleus	transcription regulator	7.9917e-07	5.57286e-08	down	1.8522	-1.8522	-0.889243
Role of NFAT in Cardiac Hypertrophy	1.59	0.104	NaN	FGFR1	fibroblast growth factor receptor 1	Plasma Membrane	kinase	0.000247191	4.8071e-05	up	1.50868	1.50868	0.59329
Role of NFAT in Cardiac Hypertrophy	1.59	0.104	NaN	PRKAR2A	protein kinase cAMP-dependent type II regulatory subunit alpha	Cytoplasm	kinase	1.6572e-09	2.35652e-11	up	1.61798	1.61798	0.694197
Role of NFAT in Cardiac Hypertrophy	1.59	0.104	NaN	GNB5	G protein subunit beta 5	Plasma Membrane	enzyme	3.71155e-06	3.49654e-07	down	1.5287	-1.5287	-0.612307
Role of NFAT in Cardiac Hypertrophy	1.59	0.104	NaN	PIK3R3	phosphoinositide-3-kinase regulatory subunit 3	Cytoplasm	kinase	8.33611e-08	3.4717e-09	down	1.6323	-1.6323	-0.706907
Role of NFAT in Cardiac Hypertrophy	1.59	0.104	NaN	GNB4	G protein subunit beta 4	Plasma Membrane	enzyme	2.91359e-06	2.6225e-07	down	1.9306	-1.9306	-0.949047
Role of NFAT in Cardiac Hypertrophy	1.59	0.104	NaN	GNAI3	G protein subunit alpha i3	Cytoplasm	enzyme	1.09582e-07	4.92056e-09	down	1.51852	-1.51852	-0.602667
Role of NFAT in Cardiac Hypertrophy	1.59	0.104	NaN	PRKAR2B	protein kinase cAMP-dependent type II regulatory subunit beta	Cytoplasm	kinase	1.11727e-05	1.29359e-06	up	1.57564	1.57564	0.655937
Role of NFAT in Cardiac Hypertrophy	1.59	0.104	NaN	MAPK3	mitogen-activated protein kinase 3	Cytoplasm	kinase	4.35448e-07	2.63697e-08	down	1.70674	-1.70674	-0.77124
Role of NFAT in Cardiac Hypertrophy	1.59	0.104	NaN	HDAC11	histone deacetylase 11	Nucleus	transcription regulator	2.48377e-07	1.3396e-08	up	1.67911	1.67911	0.7477
Role of NFAT in Cardiac Hypertrophy	1.59	0.104	NaN	PRKCE	protein kinase C epsilon	Cytoplasm	kinase	5.22833e-10	4.84166e-12	down	2.01678	-2.01678	-1.01205
Role of NFAT in Cardiac Hypertrophy	1.59	0.104	NaN	AKT3	AKT serine/threonine kinase 3	Cytoplasm	kinase	6.87797e-06	7.27745e-07	down	1.6577	-1.6577	-0.72918
Role of NFAT in Cardiac Hypertrophy	1.59	0.104	NaN	GSK3B	glycogen synthase kinase 3 beta	Nucleus	kinase	2.55367e-07	1.38835e-08	up	1.64288	1.64288	0.71623
Role of NFAT in Cardiac Hypertrophy	1.59	0.104	NaN	SLC8A1	solute carrier family 8 member A1	Plasma Membrane	transporter	2.04622e-08	5.91891e-10	down	2.18154	-2.18154	-1.12535
Neurotrophin/TRK Signaling	1.57	0.13	-0.632	PIK3R3	phosphoinositide-3-kinase regulatory subunit 3	Cytoplasm	kinase	8.33611e-08	3.4717e-09	down	1.6323	-1.6323	-0.706907
Neurotrophin/TRK Signaling	1.57	0.13	-0.632	PIK3C2A	phosphatidylinositol-4-phosphate 3-kinase catalytic subunit type 2 alpha	Cytoplasm	kinase	2.82584e-06	2.52843e-07	down	1.59286	-1.59286	-0.671617
Neurotrophin/TRK Signaling	1.57	0.13	-0.632	CDC42	cell division cycle 42	Cytoplasm	enzyme	7.68247e-08	3.11153e-09	up	1.53845	1.53845	0.621477
Neurotrophin/TRK Signaling	1.57	0.13	-0.632	MAPK3	mitogen-activated protein kinase 3	Cytoplasm	kinase	4.35448e-07	2.63697e-08	down	1.70674	-1.70674	-0.77124
Neurotrophin/TRK Signaling	1.57	0.13	-0.632	FGFR1	fibroblast growth factor receptor 1	Plasma Membrane	kinase	0.000247191	4.8071e-05	up	1.50868	1.50868	0.59329
Neurotrophin/TRK Signaling	1.57	0.13	-0.632	PDPK1	3-phosphoinositide dependent protein kinase 1	Cytoplasm	kinase	1.1086e-07	4.99204e-09	up	1.65403	1.65403	0.725987
Neurotrophin/TRK Signaling	1.57	0.13	-0.632	RPS6KA1	ribosomal protein S6 kinase A1	Cytoplasm	kinase	3.83157e-08	1.30677e-09	down	1.61813	-1.61813	-0.694327
Neurotrophin/TRK Signaling	1.57	0.13	-0.632	NGF	nerve growth factor	Extracellular Space	growth factor	3.4574e-09	6.13073e-11	down	2.06288	-2.06288	-1.04466
Neurotrophin/TRK Signaling	1.57	0.13	-0.632	CREB5	cAMP responsive element binding protein 5	Nucleus	transcription regulator	7.24769e-06	7.75162e-07	down	1.82782	-1.82782	-0.870123
Neurotrophin/TRK Signaling	1.57	0.13	-0.632	MAP2K5	mitogen-activated protein kinase kinase 5	Cytoplasm	kinase	6.66854e-05	1.04964e-05	up	1.62147	1.62147	0.697307
P2Y Purigenic Receptor Signaling Pathway	1.57	0.112	-1.155	PRKACB	protein kinase cAMP-activated catalytic subunit beta	Cytoplasm	kinase	3.85749e-08	1.31897e-09	down	2.07728	-2.07728	-1.0547
P2Y Purigenic Receptor Signaling Pathway	1.57	0.112	-1.155	GNG4	G protein subunit gamma 4	Plasma Membrane	enzyme	2.89549e-05	3.96899e-06	down	1.50766	-1.50766	-0.592307
P2Y Purigenic Receptor Signaling Pathway	1.57	0.112	-1.155	PIK3C2A	phosphatidylinositol-4-phosphate 3-kinase catalytic subunit type 2 alpha	Cytoplasm	kinase	2.82584e-06	2.52843e-07	down	1.59286	-1.59286	-0.671617
P2Y Purigenic Receptor Signaling Pathway	1.57	0.112	-1.155	FGFR1	fibroblast growth factor receptor 1	Plasma Membrane	kinase	0.000247191	4.8071e-05	up	1.50868	1.50868	0.59329
P2Y Purigenic Receptor Signaling Pathway	1.57	0.112	-1.155	PRKAR2A	protein kinase cAMP-dependent type II regulatory subunit alpha	Cytoplasm	kinase	1.6572e-09	2.35652e-11	up	1.61798	1.61798	0.694197
P2Y Purigenic Receptor Signaling Pathway	1.57	0.112	-1.155	GNB5	G protein subunit beta 5	Plasma Membrane	enzyme	3.71155e-06	3.49654e-07	down	1.5287	-1.5287	-0.612307
P2Y Purigenic Receptor Signaling Pathway	1.57	0.112	-1.155	CREB5	cAMP responsive element binding protein 5	Nucleus	transcription regulator	7.24769e-06	7.75162e-07	down	1.82782	-1.82782	-0.870123
P2Y Purigenic Receptor Signaling Pathway	1.57	0.112	-1.155	ITGB3	integrin subunit beta 3	Plasma Membrane	transmembrane receptor	2.10739e-06	1.77301e-07	down	1.98681	-1.98681	-0.990453
P2Y Purigenic Receptor Signaling Pathway	1.57	0.112	-1.155	PIK3R3	phosphoinositide-3-kinase regulatory subunit 3	Cytoplasm	kinase	8.33611e-08	3.4717e-09	down	1.6323	-1.6323	-0.706907
P2Y Purigenic Receptor Signaling Pathway	1.57	0.112	-1.155	GNB4	G protein subunit beta 4	Plasma Membrane	enzyme	2.91359e-06	2.6225e-07	down	1.9306	-1.9306	-0.949047
P2Y Purigenic Receptor Signaling Pathway	1.57	0.112	-1.155	GNAI3	G protein subunit alpha i3	Cytoplasm	enzyme	1.09582e-07	4.92056e-09	down	1.51852	-1.51852	-0.602667
P2Y Purigenic Receptor Signaling Pathway	1.57	0.112	-1.155	PRKAR2B	protein kinase cAMP-dependent type II regulatory subunit beta	Cytoplasm	kinase	1.11727e-05	1.29359e-06	up	1.57564	1.57564	0.655937
P2Y Purigenic Receptor Signaling Pathway	1.57	0.112	-1.155	MAPK3	mitogen-activated protein kinase 3	Cytoplasm	kinase	4.35448e-07	2.63697e-08	down	1.70674	-1.70674	-0.77124
P2Y Purigenic Receptor Signaling Pathway	1.57	0.112	-1.155	PRKCE	protein kinase C epsilon	Cytoplasm	kinase	5.22833e-10	4.84166e-12	down	2.01678	-2.01678	-1.01205
P2Y Purigenic Receptor Signaling Pathway	1.57	0.112	-1.155	AKT3	AKT serine/threonine kinase 3	Cytoplasm	kinase	6.87797e-06	7.27745e-07	down	1.6577	-1.6577	-0.72918
Triacylglycerol Biosynthesis	1.56	0.152	NaN	GPAM	glycerol-3-phosphate acyltransferase, mitochondrial	Cytoplasm	enzyme	7.09847e-09	1.54947e-10	up	1.80746	1.80746	0.853963
Triacylglycerol Biosynthesis	1.56	0.152	NaN	AGPAT5	1-acylglycerol-3-phosphate O-acyltransferase 5	Cytoplasm	enzyme	1.97294e-06	1.64131e-07	down	1.60997	-1.60997	-0.68703
Triacylglycerol Biosynthesis	1.56	0.152	NaN	ABHD5	abhydrolase domain containing 5	Cytoplasm	enzyme	6.33726e-08	2.46029e-09	down	1.91445	-1.91445	-0.936933
Triacylglycerol Biosynthesis	1.56	0.152	NaN	LPCAT3	lysophosphatidylcholine acyltransferase 3	Plasma Membrane	enzyme	3.27821e-07	1.87817e-08	up	1.55499	1.55499	0.636903
Triacylglycerol Biosynthesis	1.56	0.152	NaN	GPAT3	glycerol-3-phosphate acyltransferase 3	Cytoplasm	enzyme	1.01908e-05	1.16201e-06	down	1.72312	-1.72312	-0.785023
Triacylglycerol Biosynthesis	1.56	0.152	NaN	LPGAT1	lysophosphatidylglycerol acyltransferase 1	Cytoplasm	enzyme	4.66971e-09	8.91007e-11	down	1.71612	-1.71612	-0.779153
Triacylglycerol Biosynthesis	1.56	0.152	NaN	ELOVL6	ELOVL fatty acid elongase 6	Cytoplasm	enzyme	8.49497e-07	5.97351e-08	up	2.27216	2.27216	1.18407
Role of Osteoblasts, Osteoclasts and Chondrocytes in Rheumatoid Arthritis	1.53	0.0987	NaN	MMP3	matrix metallopeptidase 3	Extracellular Space	peptidase	4.25291e-06	4.11366e-07	down	2.59578	-2.59578	-1.37617
Role of Osteoblasts, Osteoclasts and Chondrocytes in Rheumatoid Arthritis	1.53	0.0987	NaN	BAD	BCL2 associated agonist of cell death	Cytoplasm	other	1.34915e-08	3.45293e-10	up	1.5081	1.5081	0.59273
Role of Osteoblasts, Osteoclasts and Chondrocytes in Rheumatoid Arthritis	1.53	0.0987	NaN	WNT3	Wnt family member 3	Extracellular Space	other	1.4617e-05	1.78124e-06	down	1.50754	-1.50754	-0.5922
Role of Osteoblasts, Osteoclasts and Chondrocytes in Rheumatoid Arthritis	1.53	0.0987	NaN	PIK3C2A	phosphatidylinositol-4-phosphate 3-kinase catalytic subunit type 2 alpha	Cytoplasm	kinase	2.82584e-06	2.52843e-07	down	1.59286	-1.59286	-0.671617
Role of Osteoblasts, Osteoclasts and Chondrocytes in Rheumatoid Arthritis	1.53	0.0987	NaN	NFATC3	nuclear factor of activated T-cells 3	Nucleus	transcription regulator	2.44288e-06	2.1143e-07	down	1.71021	-1.71021	-0.77417
Role of Osteoblasts, Osteoclasts and Chondrocytes in Rheumatoid Arthritis	1.53	0.0987	NaN	MMP14	matrix metallopeptidase 14	Extracellular Space	peptidase	5.54164e-06	5.6478e-07	down	1.52475	-1.52475	-0.608573
Role of Osteoblasts, Osteoclasts and Chondrocytes in Rheumatoid Arthritis	1.53	0.0987	NaN	FGFR1	fibroblast growth factor receptor 1	Plasma Membrane	kinase	0.000247191	4.8071e-05	up	1.50868	1.50868	0.59329
Role of Osteoblasts, Osteoclasts and Chondrocytes in Rheumatoid Arthritis	1.53	0.0987	NaN	ITGA2	integrin subunit alpha 2	Plasma Membrane	transmembrane receptor	1.38403e-07	6.53158e-09	up	1.86016	1.86016	0.895423
Role of Osteoblasts, Osteoclasts and Chondrocytes in Rheumatoid Arthritis	1.53	0.0987	NaN	SMAD6	SMAD family member 6	Nucleus	transcription regulator	0.000169527	3.1083e-05	down	1.53174	-1.53174	-0.615173
Role of Osteoblasts, Osteoclasts and Chondrocytes in Rheumatoid Arthritis	1.53	0.0987	NaN	ITGA5	integrin subunit alpha 5	Plasma Membrane	transmembrane receptor	2.35836e-10	1.66796e-12	down	2.56143	-2.56143	-1.35695
Role of Osteoblasts, Osteoclasts and Chondrocytes in Rheumatoid Arthritis	1.53	0.0987	NaN	SMAD5	SMAD family member 5	Nucleus	transcription regulator	2.78306e-08	8.78668e-10	down	1.68691	-1.68691	-0.754387
Role of Osteoblasts, Osteoclasts and Chondrocytes in Rheumatoid Arthritis	1.53	0.0987	NaN	ITGB3	integrin subunit beta 3	Plasma Membrane	transmembrane receptor	2.10739e-06	1.77301e-07	down	1.98681	-1.98681	-0.990453
Role of Osteoblasts, Osteoclasts and Chondrocytes in Rheumatoid Arthritis	1.53	0.0987	NaN	PIK3R3	phosphoinositide-3-kinase regulatory subunit 3	Cytoplasm	kinase	8.33611e-08	3.4717e-09	down	1.6323	-1.6323	-0.706907
Role of Osteoblasts, Osteoclasts and Chondrocytes in Rheumatoid Arthritis	1.53	0.0987	NaN	TRADD	TNFRSF1A associated via death domain	Cytoplasm	other	3.76213e-11	1.25382e-13	up	2.17641	2.17641	1.12195
Role of Osteoblasts, Osteoclasts and Chondrocytes in Rheumatoid Arthritis	1.53	0.0987	NaN	FOXO1	forkhead box O1	Nucleus	transcription regulator	1.76954e-08	4.93401e-10	down	1.83353	-1.83353	-0.87462
Role of Osteoblasts, Osteoclasts and Chondrocytes in Rheumatoid Arthritis	1.53	0.0987	NaN	RUNX2	runt related transcription factor 2	Nucleus	transcription regulator	2.44957e-06	2.12071e-07	down	1.71705	-1.71705	-0.77993
Role of Osteoblasts, Osteoclasts and Chondrocytes in Rheumatoid Arthritis	1.53	0.0987	NaN	MAPK3	mitogen-activated protein kinase 3	Cytoplasm	kinase	4.35448e-07	2.63697e-08	down	1.70674	-1.70674	-0.77124
Role of Osteoblasts, Osteoclasts and Chondrocytes in Rheumatoid Arthritis	1.53	0.0987	NaN	AKT3	AKT serine/threonine kinase 3	Cytoplasm	kinase	6.87797e-06	7.27745e-07	down	1.6577	-1.6577	-0.72918
Role of Osteoblasts, Osteoclasts and Chondrocytes in Rheumatoid Arthritis	1.53	0.0987	NaN	NFATC2	nuclear factor of activated T-cells 2	Nucleus	transcription regulator	2.81161e-08	8.90543e-10	down	1.87801	-1.87801	-0.909203
Role of Osteoblasts, Osteoclasts and Chondrocytes in Rheumatoid Arthritis	1.53	0.0987	NaN	GSK3B	glycogen synthase kinase 3 beta	Nucleus	kinase	2.55367e-07	1.38835e-08	up	1.64288	1.64288	0.71623
Role of Osteoblasts, Osteoclasts and Chondrocytes in Rheumatoid Arthritis	1.53	0.0987	NaN	CSF2	colony stimulating factor 2	Extracellular Space	cytokine	7.85927e-07	5.44653e-08	down	1.51009	-1.51009	-0.594633
Role of Osteoblasts, Osteoclasts and Chondrocytes in Rheumatoid Arthritis	1.53	0.0987	NaN	IL1RAP	interleukin 1 receptor accessory protein	Plasma Membrane	transmembrane receptor	5.40659e-07	3.4586e-08	down	2.1287	-2.1287	-1.08997
Role of Osteoblasts, Osteoclasts and Chondrocytes in Rheumatoid Arthritis	1.53	0.0987	NaN	WNT5A	Wnt family member 5A	Extracellular Space	cytokine	1.19558e-06	9.04282e-08	down	1.68529	-1.68529	-0.752993
Regulation of Cellular Mechanics by Calpain Protease	1.52	0.14	0	MAPK3	mitogen-activated protein kinase 3	Cytoplasm	kinase	4.35448e-07	2.63697e-08	down	1.70674	-1.70674	-0.77124
Regulation of Cellular Mechanics by Calpain Protease	1.52	0.14	0	ITGA2	integrin subunit alpha 2	Plasma Membrane	transmembrane receptor	1.38403e-07	6.53158e-09	up	1.86016	1.86016	0.895423
Regulation of Cellular Mechanics by Calpain Protease	1.52	0.14	0	CDK6	cyclin dependent kinase 6	Nucleus	kinase	1.75382e-10	1.12439e-12	down	1.96768	-1.96768	-0.976497
Regulation of Cellular Mechanics by Calpain Protease	1.52	0.14	0	ITGA5	integrin subunit alpha 5	Plasma Membrane	transmembrane receptor	2.35836e-10	1.66796e-12	down	2.56143	-2.56143	-1.35695
Regulation of Cellular Mechanics by Calpain Protease	1.52	0.14	0	CAST	calpastatin	Cytoplasm	peptidase	1.46876e-05	1.79284e-06	down	1.51148	-1.51148	-0.59596
Regulation of Cellular Mechanics by Calpain Protease	1.52	0.14	0	VCL	vinculin	Plasma Membrane	enzyme	7.70988e-11	3.72676e-13	down	1.50646	-1.50646	-0.591167
Regulation of Cellular Mechanics by Calpain Protease	1.52	0.14	0	CCND1	cyclin D1	Nucleus	transcription regulator	6.00024e-10	5.95338e-12	down	2.30478	-2.30478	-1.20463
Regulation of Cellular Mechanics by Calpain Protease	1.52	0.14	0	EGFR	epidermal growth factor receptor	Plasma Membrane	kinase	7.80544e-08	3.18516e-09	down	1.65723	-1.65723	-0.728773
EGF Signaling	1.51	0.132	-1	PIK3R3	phosphoinositide-3-kinase regulatory subunit 3	Cytoplasm	kinase	8.33611e-08	3.4717e-09	down	1.6323	-1.6323	-0.706907
EGF Signaling	1.51	0.132	-1	CSNK2A2	casein kinase 2 alpha 2	Cytoplasm	kinase	6.838e-06	7.22554e-07	up	1.75656	1.75656	0.812757
EGF Signaling	1.51	0.132	-1	MTOR	mechanistic target of rapamycin	Nucleus	kinase	2.15174e-08	6.28984e-10	up	1.65752	1.65752	0.729023
EGF Signaling	1.51	0.132	-1	JAK1	Janus kinase 1	Cytoplasm	kinase	1.06066e-06	7.81996e-08	down	1.54581	-1.54581	-0.62836
EGF Signaling	1.51	0.132	-1	PIK3C2A	phosphatidylinositol-4-phosphate 3-kinase catalytic subunit type 2 alpha	Cytoplasm	kinase	2.82584e-06	2.52843e-07	down	1.59286	-1.59286	-0.671617
EGF Signaling	1.51	0.132	-1	MAPK3	mitogen-activated protein kinase 3	Cytoplasm	kinase	4.35448e-07	2.63697e-08	down	1.70674	-1.70674	-0.77124
EGF Signaling	1.51	0.132	-1	FGFR1	fibroblast growth factor receptor 1	Plasma Membrane	kinase	0.000247191	4.8071e-05	up	1.50868	1.50868	0.59329
EGF Signaling	1.51	0.132	-1	AKT3	AKT serine/threonine kinase 3	Cytoplasm	kinase	6.87797e-06	7.27745e-07	down	1.6577	-1.6577	-0.72918
EGF Signaling	1.51	0.132	-1	EGFR	epidermal growth factor receptor	Plasma Membrane	kinase	7.80544e-08	3.18516e-09	down	1.65723	-1.65723	-0.728773
GADD45 Signaling	1.51	0.211	NaN	CCNE2	cyclin E2	Nucleus	other	2.45101e-09	4.01569e-11	down	1.80926	-1.80926	-0.855403
GADD45 Signaling	1.51	0.211	NaN	CCND2	cyclin D2	Nucleus	other	1.86059e-07	9.41018e-09	down	2.07703	-2.07703	-1.05452
GADD45 Signaling	1.51	0.211	NaN	BRCA1	BRCA1, DNA repair associated	Nucleus	transcription regulator	2.40849e-06	2.07963e-07	down	1.52917	-1.52917	-0.612753
GADD45 Signaling	1.51	0.211	NaN	CCND1	cyclin D1	Nucleus	transcription regulator	6.00024e-10	5.95338e-12	down	2.30478	-2.30478	-1.20463
DNA damage-induced 14-3-3σ Signaling	1.51	0.211	NaN	CCNE2	cyclin E2	Nucleus	other	2.45101e-09	4.01569e-11	down	1.80926	-1.80926	-0.855403
DNA damage-induced 14-3-3σ Signaling	1.51	0.211	NaN	AKT3	AKT serine/threonine kinase 3	Cytoplasm	kinase	6.87797e-06	7.27745e-07	down	1.6577	-1.6577	-0.72918
DNA damage-induced 14-3-3σ Signaling	1.51	0.211	NaN	BRCA1	BRCA1, DNA repair associated	Nucleus	transcription regulator	2.40849e-06	2.07963e-07	down	1.52917	-1.52917	-0.612753
DNA damage-induced 14-3-3σ Signaling	1.51	0.211	NaN	RAD1	RAD1 checkpoint DNA exonuclease	Nucleus	enzyme	3.37009e-08	1.11202e-09	down	1.81704	-1.81704	-0.86159
ILK Signaling	1.5	0.102	-0.471	PIK3C2A	phosphatidylinositol-4-phosphate 3-kinase catalytic subunit type 2 alpha	Cytoplasm	kinase	2.82584e-06	2.52843e-07	down	1.59286	-1.59286	-0.671617
ILK Signaling	1.5	0.102	-0.471	FGFR1	fibroblast growth factor receptor 1	Plasma Membrane	kinase	0.000247191	4.8071e-05	up	1.50868	1.50868	0.59329
ILK Signaling	1.5	0.102	-0.471	VEGFC	vascular endothelial growth factor C	Extracellular Space	growth factor	3.58259e-08	1.19581e-09	down	1.61553	-1.61553	-0.692007
ILK Signaling	1.5	0.102	-0.471	PDPK1	3-phosphoinositide dependent protein kinase 1	Cytoplasm	kinase	1.1086e-07	4.99204e-09	up	1.65403	1.65403	0.725987
ILK Signaling	1.5	0.102	-0.471	CREB5	cAMP responsive element binding protein 5	Nucleus	transcription regulator	7.24769e-06	7.75162e-07	down	1.82782	-1.82782	-0.870123
ILK Signaling	1.5	0.102	-0.471	CCND1	cyclin D1	Nucleus	transcription regulator	6.00024e-10	5.95338e-12	down	2.30478	-2.30478	-1.20463
ILK Signaling	1.5	0.102	-0.471	PPP2R5A	protein phosphatase 2 regulatory subunit B'alpha	Cytoplasm	phosphatase	4.36257e-10	3.81011e-12	up	1.99923	1.99923	0.999443
ILK Signaling	1.5	0.102	-0.471	ITGB3	integrin subunit beta 3	Plasma Membrane	transmembrane receptor	2.10739e-06	1.77301e-07	down	1.98681	-1.98681	-0.990453
ILK Signaling	1.5	0.102	-0.471	PTEN	phosphatase and tensin homolog	Cytoplasm	phosphatase	4.30522e-08	1.52354e-09	down	2.05755	-2.05755	-1.04093
ILK Signaling	1.5	0.102	-0.471	PIK3R3	phosphoinositide-3-kinase regulatory subunit 3	Cytoplasm	kinase	8.33611e-08	3.4717e-09	down	1.6323	-1.6323	-0.706907
ILK Signaling	1.5	0.102	-0.471	MTOR	mechanistic target of rapamycin	Nucleus	kinase	2.15174e-08	6.28984e-10	up	1.65752	1.65752	0.729023
ILK Signaling	1.5	0.102	-0.471	CFL2	cofilin 2	Extracellular Space	other	1.08471e-11	2.31805e-14	down	2.63909	-2.63909	-1.40004
ILK Signaling	1.5	0.102	-0.471	CDC42	cell division cycle 42	Cytoplasm	enzyme	7.68247e-08	3.11153e-09	up	1.53845	1.53845	0.621477
ILK Signaling	1.5	0.102	-0.471	MAPK3	mitogen-activated protein kinase 3	Cytoplasm	kinase	4.35448e-07	2.63697e-08	down	1.70674	-1.70674	-0.77124
ILK Signaling	1.5	0.102	-0.471	AKT3	AKT serine/threonine kinase 3	Cytoplasm	kinase	6.87797e-06	7.27745e-07	down	1.6577	-1.6577	-0.72918
ILK Signaling	1.5	0.102	-0.471	PTGS2	prostaglandin-endoperoxide synthase 2	Cytoplasm	enzyme	7.99585e-06	8.7125e-07	down	1.80716	-1.80716	-0.853727
ILK Signaling	1.5	0.102	-0.471	GSK3B	glycogen synthase kinase 3 beta	Nucleus	kinase	2.55367e-07	1.38835e-08	up	1.64288	1.64288	0.71623
ILK Signaling	1.5	0.102	-0.471	VCL	vinculin	Plasma Membrane	enzyme	7.70988e-11	3.72676e-13	down	1.50646	-1.50646	-0.591167
ILK Signaling	1.5	0.102	-0.471	PPP2R1B	protein phosphatase 2 scaffold subunit Abeta	Plasma Membrane	phosphatase	1.07505e-10	5.86427e-13	down	3.55737	-3.55737	-1.83081
ILK Signaling	1.5	0.102	-0.471	FNBP1	formin binding protein 1	Nucleus	enzyme	1.3572e-06	1.05504e-07	up	1.82302	1.82302	0.866333
Superpathway of Cholesterol Biosynthesis	1.49	0.179	NaN	SQLE	squalene epoxidase	Cytoplasm	enzyme	1.97562e-10	1.3269e-12	up	2.0635	2.0635	1.04509
Superpathway of Cholesterol Biosynthesis	1.49	0.179	NaN	PMVK	phosphomevalonate kinase	Cytoplasm	kinase	3.06202e-09	5.32836e-11	up	1.75047	1.75047	0.80774
Superpathway of Cholesterol Biosynthesis	1.49	0.179	NaN	LSS	lanosterol synthase	Cytoplasm	enzyme	1.02318e-06	7.48768e-08	up	1.56758	1.56758	0.648537
Superpathway of Cholesterol Biosynthesis	1.49	0.179	NaN	SC5D	sterol-C5-desaturase	Cytoplasm	enzyme	8.04495e-09	1.80909e-10	down	2.06554	-2.06554	-1.04652
Superpathway of Cholesterol Biosynthesis	1.49	0.179	NaN	LBR	lamin B receptor	Nucleus	enzyme	3.48659e-11	1.13538e-13	down	1.80311	-1.80311	-0.85049
Superpathway of Inositol Phosphate Compounds	1.49	0.0979	NaN	CDC25C	cell division cycle 25C	Nucleus	phosphatase	1.99828e-07	1.02438e-08	down	1.53353	-1.53353	-0.616857
Superpathway of Inositol Phosphate Compounds	1.49	0.0979	NaN	PIK3C2A	phosphatidylinositol-4-phosphate 3-kinase catalytic subunit type 2 alpha	Cytoplasm	kinase	2.82584e-06	2.52843e-07	down	1.59286	-1.59286	-0.671617
Superpathway of Inositol Phosphate Compounds	1.49	0.0979	NaN	MTMR9	myotubularin related protein 9	Cytoplasm	phosphatase	1.22625e-08	3.0604e-10	down	2.25266	-2.25266	-1.17163
Superpathway of Inositol Phosphate Compounds	1.49	0.0979	NaN	PTPN2	protein tyrosine phosphatase, non-receptor type 2	Cytoplasm	phosphatase	1.86738e-07	9.44925e-09	down	1.88027	-1.88027	-0.910937
Superpathway of Inositol Phosphate Compounds	1.49	0.0979	NaN	FGFR1	fibroblast growth factor receptor 1	Plasma Membrane	kinase	0.000247191	4.8071e-05	up	1.50868	1.50868	0.59329
Superpathway of Inositol Phosphate Compounds	1.49	0.0979	NaN	PIP4K2B	phosphatidylinositol-5-phosphate 4-kinase type 2 beta	Cytoplasm	kinase	4.19788e-08	1.47519e-09	down	1.58895	-1.58895	-0.668073
Superpathway of Inositol Phosphate Compounds	1.49	0.0979	NaN	ERBB3	erb-b2 receptor tyrosine kinase 3	Plasma Membrane	kinase	3.01109e-07	1.69449e-08	up	1.67148	1.67148	0.741127
Superpathway of Inositol Phosphate Compounds	1.49	0.0979	NaN	PXYLP1	2-phosphoxylose phosphatase 1	Cytoplasm	phosphatase	1.81024e-09	2.68494e-11	down	1.85496	-1.85496	-0.89139
Superpathway of Inositol Phosphate Compounds	1.49	0.0979	NaN	PTPRF	protein tyrosine phosphatase, receptor type F	Plasma Membrane	phosphatase	7.40141e-10	7.98532e-12	down	1.71825	-1.71825	-0.780943
Superpathway of Inositol Phosphate Compounds	1.49	0.0979	NaN	PPP2R5A	protein phosphatase 2 regulatory subunit B'alpha	Cytoplasm	phosphatase	4.36257e-10	3.81011e-12	up	1.99923	1.99923	0.999443
Superpathway of Inositol Phosphate Compounds	1.49	0.0979	NaN	PTEN	phosphatase and tensin homolog	Cytoplasm	phosphatase	4.30522e-08	1.52354e-09	down	2.05755	-2.05755	-1.04093
Superpathway of Inositol Phosphate Compounds	1.49	0.0979	NaN	MET	MET proto-oncogene, receptor tyrosine kinase	Plasma Membrane	kinase	1.12073e-05	1.2993e-06	down	1.5292	-1.5292	-0.61278
Superpathway of Inositol Phosphate Compounds	1.49	0.0979	NaN	PIK3R3	phosphoinositide-3-kinase regulatory subunit 3	Cytoplasm	kinase	8.33611e-08	3.4717e-09	down	1.6323	-1.6323	-0.706907
Superpathway of Inositol Phosphate Compounds	1.49	0.0979	NaN	DUSP5	dual specificity phosphatase 5	Nucleus	phosphatase	4.51678e-10	3.9759e-12	down	1.79011	-1.79011	-0.84005
Superpathway of Inositol Phosphate Compounds	1.49	0.0979	NaN	PTPRJ	protein tyrosine phosphatase, receptor type J	Plasma Membrane	phosphatase	2.36348e-08	7.10764e-10	down	1.70435	-1.70435	-0.769223
Superpathway of Inositol Phosphate Compounds	1.49	0.0979	NaN	PPP1R7	protein phosphatase 1 regulatory subunit 7	Nucleus	phosphatase	1.91811e-08	5.46051e-10	up	1.51893	1.51893	0.603057
Superpathway of Inositol Phosphate Compounds	1.49	0.0979	NaN	PPM1H	protein phosphatase, Mg2+/Mn2+ dependent 1H	Nucleus	phosphatase	8.71728e-07	6.16089e-08	up	1.64629	1.64629	0.719217
Superpathway of Inositol Phosphate Compounds	1.49	0.0979	NaN	PRUNE1	prune exopolyphosphatase 1	Nucleus	enzyme	9.36801e-09	2.16165e-10	down	1.64782	-1.64782	-0.720557
Superpathway of Inositol Phosphate Compounds	1.49	0.0979	NaN	DUSP12	dual specificity phosphatase 12	Nucleus	phosphatase	4.80782e-09	9.25921e-11	down	1.52957	-1.52957	-0.613127
Superpathway of Inositol Phosphate Compounds	1.49	0.0979	NaN	PPIP5K2	diphosphoinositol pentakisphosphate kinase 2	Cytoplasm	kinase	1.47187e-08	3.87934e-10	up	1.76262	1.76262	0.817723
Superpathway of Inositol Phosphate Compounds	1.49	0.0979	NaN	PIP4K2C	phosphatidylinositol-5-phosphate 4-kinase type 2 gamma	Cytoplasm	kinase	1.35592e-09	1.82482e-11	down	1.8346	-1.8346	-0.875467
Superpathway of Inositol Phosphate Compounds	1.49	0.0979	NaN	EGFR	epidermal growth factor receptor	Plasma Membrane	kinase	7.80544e-08	3.18516e-09	down	1.65723	-1.65723	-0.728773
Superpathway of Inositol Phosphate Compounds	1.49	0.0979	NaN	CDC25A	cell division cycle 25A	Nucleus	phosphatase	2.09251e-08	6.0688e-10	down	1.72289	-1.72289	-0.784827
Virus Entry via Endocytic Pathways	1.49	0.118	NaN	DNM1	dynamin 1	Cytoplasm	enzyme	1.12992e-06	8.45705e-08	up	1.6039	1.6039	0.681587
Virus Entry via Endocytic Pathways	1.49	0.118	NaN	PIK3R3	phosphoinositide-3-kinase regulatory subunit 3	Cytoplasm	kinase	8.33611e-08	3.4717e-09	down	1.6323	-1.6323	-0.706907
Virus Entry via Endocytic Pathways	1.49	0.118	NaN	PIK3C2A	phosphatidylinositol-4-phosphate 3-kinase catalytic subunit type 2 alpha	Cytoplasm	kinase	2.82584e-06	2.52843e-07	down	1.59286	-1.59286	-0.671617
Virus Entry via Endocytic Pathways	1.49	0.118	NaN	CDC42	cell division cycle 42	Cytoplasm	enzyme	7.68247e-08	3.11153e-09	up	1.53845	1.53845	0.621477
Virus Entry via Endocytic Pathways	1.49	0.118	NaN	FGFR1	fibroblast growth factor receptor 1	Plasma Membrane	kinase	0.000247191	4.8071e-05	up	1.50868	1.50868	0.59329
Virus Entry via Endocytic Pathways	1.49	0.118	NaN	ITGA2	integrin subunit alpha 2	Plasma Membrane	transmembrane receptor	1.38403e-07	6.53158e-09	up	1.86016	1.86016	0.895423
Virus Entry via Endocytic Pathways	1.49	0.118	NaN	ITGA6	integrin subunit alpha 6	Plasma Membrane	transmembrane receptor	4.16708e-10	3.60446e-12	down	1.9976	-1.9976	-0.99827
Virus Entry via Endocytic Pathways	1.49	0.118	NaN	ITGA5	integrin subunit alpha 5	Plasma Membrane	transmembrane receptor	2.35836e-10	1.66796e-12	down	2.56143	-2.56143	-1.35695
Virus Entry via Endocytic Pathways	1.49	0.118	NaN	TFRC	transferrin receptor	Plasma Membrane	transporter	2.39847e-09	3.90522e-11	up	1.9765	1.9765	0.98295
Virus Entry via Endocytic Pathways	1.49	0.118	NaN	PRKCE	protein kinase C epsilon	Cytoplasm	kinase	5.22833e-10	4.84166e-12	down	2.01678	-2.01678	-1.01205
Virus Entry via Endocytic Pathways	1.49	0.118	NaN	CXADR	coxsackie virus and adenovirus receptor	Plasma Membrane	transmembrane receptor	2.90359e-06	2.61203e-07	up	1.52243	1.52243	0.606377
Virus Entry via Endocytic Pathways	1.49	0.118	NaN	ITGB3	integrin subunit beta 3	Plasma Membrane	transmembrane receptor	2.10739e-06	1.77301e-07	down	1.98681	-1.98681	-0.990453
Leukocyte Extravasation Signaling	1.47	0.0995	-1.213	CLDN11	claudin 11	Plasma Membrane	other	1.77638e-07	8.9255e-09	down	1.5812	-1.5812	-0.661023
Leukocyte Extravasation Signaling	1.47	0.0995	-1.213	MMP3	matrix metallopeptidase 3	Extracellular Space	peptidase	4.25291e-06	4.11366e-07	down	2.59578	-2.59578	-1.37617
Leukocyte Extravasation Signaling	1.47	0.0995	-1.213	PIK3C2A	phosphatidylinositol-4-phosphate 3-kinase catalytic subunit type 2 alpha	Cytoplasm	kinase	2.82584e-06	2.52843e-07	down	1.59286	-1.59286	-0.671617
Leukocyte Extravasation Signaling	1.47	0.0995	-1.213	MMP14	matrix metallopeptidase 14	Extracellular Space	peptidase	5.54164e-06	5.6478e-07	down	1.52475	-1.52475	-0.608573
Leukocyte Extravasation Signaling	1.47	0.0995	-1.213	FGFR1	fibroblast growth factor receptor 1	Plasma Membrane	kinase	0.000247191	4.8071e-05	up	1.50868	1.50868	0.59329
Leukocyte Extravasation Signaling	1.47	0.0995	-1.213	ITGA2	integrin subunit alpha 2	Plasma Membrane	transmembrane receptor	1.38403e-07	6.53158e-09	up	1.86016	1.86016	0.895423
Leukocyte Extravasation Signaling	1.47	0.0995	-1.213	WASL	Wiskott-Aldrich syndrome like	Cytoplasm	other	9.38587e-08	4.01634e-09	up	1.60073	1.60073	0.678733
Leukocyte Extravasation Signaling	1.47	0.0995	-1.213	ITGA6	integrin subunit alpha 6	Plasma Membrane	transmembrane receptor	4.16708e-10	3.60446e-12	down	1.9976	-1.9976	-0.99827
Leukocyte Extravasation Signaling	1.47	0.0995	-1.213	ITGA5	integrin subunit alpha 5	Plasma Membrane	transmembrane receptor	2.35836e-10	1.66796e-12	down	2.56143	-2.56143	-1.35695
Leukocyte Extravasation Signaling	1.47	0.0995	-1.213	CRK	CRK proto-oncogene, adaptor protein	Cytoplasm	other	2.44547e-11	7.27911e-14	down	1.87964	-1.87964	-0.91046
Leukocyte Extravasation Signaling	1.47	0.0995	-1.213	RAP1A	RAP1A, member of RAS oncogene family	Cytoplasm	enzyme	1.35837e-14	3.45579e-19	down	2.46964	-2.46964	-1.3043
Leukocyte Extravasation Signaling	1.47	0.0995	-1.213	ITGB3	integrin subunit beta 3	Plasma Membrane	transmembrane receptor	2.10739e-06	1.77301e-07	down	1.98681	-1.98681	-0.990453
Leukocyte Extravasation Signaling	1.47	0.0995	-1.213	PIK3R3	phosphoinositide-3-kinase regulatory subunit 3	Cytoplasm	kinase	8.33611e-08	3.4717e-09	down	1.6323	-1.6323	-0.706907
Leukocyte Extravasation Signaling	1.47	0.0995	-1.213	ARHGAP5	Rho GTPase activating protein 5	Cytoplasm	enzyme	8.12764e-09	1.82994e-10	down	1.66015	-1.66015	-0.73131
Leukocyte Extravasation Signaling	1.47	0.0995	-1.213	GNAI3	G protein subunit alpha i3	Cytoplasm	enzyme	1.09582e-07	4.92056e-09	down	1.51852	-1.51852	-0.602667
Leukocyte Extravasation Signaling	1.47	0.0995	-1.213	CLDN4	claudin 4	Plasma Membrane	transmembrane receptor	5.18744e-05	7.82861e-06	down	1.78455	-1.78455	-0.83556
Leukocyte Extravasation Signaling	1.47	0.0995	-1.213	CDC42	cell division cycle 42	Cytoplasm	enzyme	7.68247e-08	3.11153e-09	up	1.53845	1.53845	0.621477
Leukocyte Extravasation Signaling	1.47	0.0995	-1.213	CLDN1	claudin 1	Plasma Membrane	other	1.77171e-09	2.60526e-11	down	1.6058	-1.6058	-0.683297
Leukocyte Extravasation Signaling	1.47	0.0995	-1.213	PRKCE	protein kinase C epsilon	Cytoplasm	kinase	5.22833e-10	4.84166e-12	down	2.01678	-2.01678	-1.01205
Leukocyte Extravasation Signaling	1.47	0.0995	-1.213	VCL	vinculin	Plasma Membrane	enzyme	7.70988e-11	3.72676e-13	down	1.50646	-1.50646	-0.591167
Leukocyte Extravasation Signaling	1.47	0.0995	-1.213	TIMP2	TIMP metallopeptidase inhibitor 2	Extracellular Space	other	2.37898e-11	6.85533e-14	down	2.47653	-2.47653	-1.30832
Role of BRCA1 in DNA Damage Response	1.47	0.125	NaN	SMARCA2	SWI/SNF related, matrix associated, actin dependent regulator of chromatin, subfamily a, member 2	Nucleus	transcription regulator	1.06045e-07	4.71855e-09	down	1.55412	-1.55412	-0.636097
Role of BRCA1 in DNA Damage Response	1.47	0.125	NaN	MRE11	MRE11 homolog, double strand break repair nuclease	Nucleus	enzyme	1.56027e-05	1.92558e-06	down	1.56939	-1.56939	-0.650207
Role of BRCA1 in DNA Damage Response	1.47	0.125	NaN	BARD1	BRCA1 associated RING domain 1	Nucleus	transcription regulator	9.61707e-09	2.2338e-10	down	1.60671	-1.60671	-0.684113
Role of BRCA1 in DNA Damage Response	1.47	0.125	NaN	SMARCE1	SWI/SNF related, matrix associated, actin dependent regulator of chromatin, subfamily e, member 1	Nucleus	transcription regulator	1.8058e-09	2.67377e-11	up	2.03758	2.03758	1.02685
Role of BRCA1 in DNA Damage Response	1.47	0.125	NaN	SMARCC1	SWI/SNF related, matrix associated, actin dependent regulator of chromatin subfamily c member 1	Nucleus	transcription regulator	1.14545e-10	6.41563e-13	up	2.12213	2.12213	1.08551
Role of BRCA1 in DNA Damage Response	1.47	0.125	NaN	RFC5	replication factor C subunit 5	Nucleus	enzyme	7.82776e-12	1.31435e-14	down	2.7852	-2.7852	-1.47778
Role of BRCA1 in DNA Damage Response	1.47	0.125	NaN	BRCA1	BRCA1, DNA repair associated	Nucleus	transcription regulator	2.40849e-06	2.07963e-07	down	1.52917	-1.52917	-0.612753
Role of BRCA1 in DNA Damage Response	1.47	0.125	NaN	FANCA	Fanconi anemia complementation group A	Nucleus	other	1.5187e-07	7.37191e-09	down	1.60665	-1.60665	-0.68406
Role of BRCA1 in DNA Damage Response	1.47	0.125	NaN	PHF10	PHD finger protein 10	Nucleus	other	1.25289e-09	1.64154e-11	up	2.33051	2.33051	1.22064
Role of BRCA1 in DNA Damage Response	1.47	0.125	NaN	RFC3	replication factor C subunit 3	Nucleus	enzyme	1.72716e-08	4.78508e-10	down	1.51502	-1.51502	-0.599333
Glioblastoma Multiforme Signaling	1.47	0.105	-1.291	WNT3	Wnt family member 3	Extracellular Space	other	1.4617e-05	1.78124e-06	down	1.50754	-1.50754	-0.5922
Glioblastoma Multiforme Signaling	1.47	0.105	-1.291	PIK3C2A	phosphatidylinositol-4-phosphate 3-kinase catalytic subunit type 2 alpha	Cytoplasm	kinase	2.82584e-06	2.52843e-07	down	1.59286	-1.59286	-0.671617
Glioblastoma Multiforme Signaling	1.47	0.105	-1.291	FGFR1	fibroblast growth factor receptor 1	Plasma Membrane	kinase	0.000247191	4.8071e-05	up	1.50868	1.50868	0.59329
Glioblastoma Multiforme Signaling	1.47	0.105	-1.291	CDK6	cyclin dependent kinase 6	Nucleus	kinase	1.75382e-10	1.12439e-12	down	1.96768	-1.96768	-0.976497
Glioblastoma Multiforme Signaling	1.47	0.105	-1.291	CCND1	cyclin D1	Nucleus	transcription regulator	6.00024e-10	5.95338e-12	down	2.30478	-2.30478	-1.20463
Glioblastoma Multiforme Signaling	1.47	0.105	-1.291	PDGFB	platelet derived growth factor subunit B	Extracellular Space	growth factor	7.58112e-09	1.67989e-10	down	1.56623	-1.56623	-0.647293
Glioblastoma Multiforme Signaling	1.47	0.105	-1.291	PTEN	phosphatase and tensin homolog	Cytoplasm	phosphatase	4.30522e-08	1.52354e-09	down	2.05755	-2.05755	-1.04093
Glioblastoma Multiforme Signaling	1.47	0.105	-1.291	PIK3R3	phosphoinositide-3-kinase regulatory subunit 3	Cytoplasm	kinase	8.33611e-08	3.4717e-09	down	1.6323	-1.6323	-0.706907
Glioblastoma Multiforme Signaling	1.47	0.105	-1.291	MTOR	mechanistic target of rapamycin	Nucleus	kinase	2.15174e-08	6.28984e-10	up	1.65752	1.65752	0.729023
Glioblastoma Multiforme Signaling	1.47	0.105	-1.291	FOXO1	forkhead box O1	Nucleus	transcription regulator	1.76954e-08	4.93401e-10	down	1.83353	-1.83353	-0.87462
Glioblastoma Multiforme Signaling	1.47	0.105	-1.291	CDC42	cell division cycle 42	Cytoplasm	enzyme	7.68247e-08	3.11153e-09	up	1.53845	1.53845	0.621477
Glioblastoma Multiforme Signaling	1.47	0.105	-1.291	MAPK3	mitogen-activated protein kinase 3	Cytoplasm	kinase	4.35448e-07	2.63697e-08	down	1.70674	-1.70674	-0.77124
Glioblastoma Multiforme Signaling	1.47	0.105	-1.291	AKT3	AKT serine/threonine kinase 3	Cytoplasm	kinase	6.87797e-06	7.27745e-07	down	1.6577	-1.6577	-0.72918
Glioblastoma Multiforme Signaling	1.47	0.105	-1.291	GSK3B	glycogen synthase kinase 3 beta	Nucleus	kinase	2.55367e-07	1.38835e-08	up	1.64288	1.64288	0.71623
Glioblastoma Multiforme Signaling	1.47	0.105	-1.291	FNBP1	formin binding protein 1	Nucleus	enzyme	1.3572e-06	1.05504e-07	up	1.82302	1.82302	0.866333
Glioblastoma Multiforme Signaling	1.47	0.105	-1.291	EGFR	epidermal growth factor receptor	Plasma Membrane	kinase	7.80544e-08	3.18516e-09	down	1.65723	-1.65723	-0.728773
Glioblastoma Multiforme Signaling	1.47	0.105	-1.291	WNT5A	Wnt family member 5A	Extracellular Space	cytokine	1.19558e-06	9.04282e-08	down	1.68529	-1.68529	-0.752993
Serine Biosynthesis	1.43	0.4	NaN	PSAT1	phosphoserine aminotransferase 1	Cytoplasm	enzyme	5.4597e-10	5.2226e-12	down	1.62843	-1.62843	-0.70348
Serine Biosynthesis	1.43	0.4	NaN	PHGDH	phosphoglycerate dehydrogenase	Cytoplasm	enzyme	8.11063e-10	9.09299e-12	down	1.79984	-1.79984	-0.84787
2-oxobutanoate Degradation I	1.43	0.4	NaN	PCCA	propionyl-CoA carboxylase alpha subunit	Cytoplasm	enzyme	2.85792e-07	1.58212e-08	up	1.69272	1.69272	0.759347
2-oxobutanoate Degradation I	1.43	0.4	NaN	DLD	dihydrolipoamide dehydrogenase	Cytoplasm	enzyme	1.4059e-05	1.69823e-06	down	1.51035	-1.51035	-0.59488
dTMP De Novo Biosynthesis	1.43	0.4	NaN	SHMT1	serine hydroxymethyltransferase 1	Cytoplasm	enzyme	4.34743e-10	3.78259e-12	up	1.72148	1.72148	0.783653
dTMP De Novo Biosynthesis	1.43	0.4	NaN	DHFR2	dihydrofolate reductase 2	Cytoplasm	enzyme	9.63661e-06	1.08779e-06	down	1.74146	-1.74146	-0.800297
Cancer Drug Resistance By Drug Efflux	1.43	0.143	NaN	PIK3R3	phosphoinositide-3-kinase regulatory subunit 3	Cytoplasm	kinase	8.33611e-08	3.4717e-09	down	1.6323	-1.6323	-0.706907
Cancer Drug Resistance By Drug Efflux	1.43	0.143	NaN	FOXO1	forkhead box O1	Nucleus	transcription regulator	1.76954e-08	4.93401e-10	down	1.83353	-1.83353	-0.87462
Cancer Drug Resistance By Drug Efflux	1.43	0.143	NaN	MAPK3	mitogen-activated protein kinase 3	Cytoplasm	kinase	4.35448e-07	2.63697e-08	down	1.70674	-1.70674	-0.77124
Cancer Drug Resistance By Drug Efflux	1.43	0.143	NaN	FOXO3	forkhead box O3	Nucleus	transcription regulator	6.36945e-09	1.34477e-10	down	1.57783	-1.57783	-0.657943
Cancer Drug Resistance By Drug Efflux	1.43	0.143	NaN	AKT3	AKT serine/threonine kinase 3	Cytoplasm	kinase	6.87797e-06	7.27745e-07	down	1.6577	-1.6577	-0.72918
Cancer Drug Resistance By Drug Efflux	1.43	0.143	NaN	PTGS2	prostaglandin-endoperoxide synthase 2	Cytoplasm	enzyme	7.99585e-06	8.7125e-07	down	1.80716	-1.80716	-0.853727
Cancer Drug Resistance By Drug Efflux	1.43	0.143	NaN	PTEN	phosphatase and tensin homolog	Cytoplasm	phosphatase	4.30522e-08	1.52354e-09	down	2.05755	-2.05755	-1.04093
Type II Diabetes Mellitus Signaling	1.42	0.109	-0.577	PIK3C2A	phosphatidylinositol-4-phosphate 3-kinase catalytic subunit type 2 alpha	Cytoplasm	kinase	2.82584e-06	2.52843e-07	down	1.59286	-1.59286	-0.671617
Type II Diabetes Mellitus Signaling	1.42	0.109	-0.577	SLC27A2	solute carrier family 27 member 2	Cytoplasm	transporter	0.000164905	3.00972e-05	up	1.50683	1.50683	0.591517
Type II Diabetes Mellitus Signaling	1.42	0.109	-0.577	FGFR1	fibroblast growth factor receptor 1	Plasma Membrane	kinase	0.000247191	4.8071e-05	up	1.50868	1.50868	0.59329
Type II Diabetes Mellitus Signaling	1.42	0.109	-0.577	PDPK1	3-phosphoinositide dependent protein kinase 1	Cytoplasm	kinase	1.1086e-07	4.99204e-09	up	1.65403	1.65403	0.725987
Type II Diabetes Mellitus Signaling	1.42	0.109	-0.577	ADIPOR1	adiponectin receptor 1	Plasma Membrane	transmembrane receptor	6.33052e-10	6.44213e-12	down	2.15938	-2.15938	-1.11062
Type II Diabetes Mellitus Signaling	1.42	0.109	-0.577	PIK3R3	phosphoinositide-3-kinase regulatory subunit 3	Cytoplasm	kinase	8.33611e-08	3.4717e-09	down	1.6323	-1.6323	-0.706907
Type II Diabetes Mellitus Signaling	1.42	0.109	-0.577	TRADD	TNFRSF1A associated via death domain	Cytoplasm	other	3.76213e-11	1.25382e-13	up	2.17641	2.17641	1.12195
Type II Diabetes Mellitus Signaling	1.42	0.109	-0.577	MTOR	mechanistic target of rapamycin	Nucleus	kinase	2.15174e-08	6.28984e-10	up	1.65752	1.65752	0.729023
Type II Diabetes Mellitus Signaling	1.42	0.109	-0.577	MAPK3	mitogen-activated protein kinase 3	Cytoplasm	kinase	4.35448e-07	2.63697e-08	down	1.70674	-1.70674	-0.77124
Type II Diabetes Mellitus Signaling	1.42	0.109	-0.577	PRKAA2	protein kinase AMP-activated catalytic subunit alpha 2	Cytoplasm	kinase	2.10783e-08	6.11859e-10	up	2.56896	2.56896	1.36119
Type II Diabetes Mellitus Signaling	1.42	0.109	-0.577	PRKCE	protein kinase C epsilon	Cytoplasm	kinase	5.22833e-10	4.84166e-12	down	2.01678	-2.01678	-1.01205
Type II Diabetes Mellitus Signaling	1.42	0.109	-0.577	AKT3	AKT serine/threonine kinase 3	Cytoplasm	kinase	6.87797e-06	7.27745e-07	down	1.6577	-1.6577	-0.72918
Type II Diabetes Mellitus Signaling	1.42	0.109	-0.577	ACSL4	acyl-CoA synthetase long-chain family member 4	Cytoplasm	enzyme	5.39526e-05	8.19302e-06	up	1.50719	1.50719	0.591857
Type II Diabetes Mellitus Signaling	1.42	0.109	-0.577	ADIPOR2	adiponectin receptor 2	Plasma Membrane	transmembrane receptor	1.58145e-11	4.02333e-14	up	2.13019	2.13019	1.09098
Acute Myeloid Leukemia Signaling	1.42	0.118	-1	PIK3R3	phosphoinositide-3-kinase regulatory subunit 3	Cytoplasm	kinase	8.33611e-08	3.4717e-09	down	1.6323	-1.6323	-0.706907
Acute Myeloid Leukemia Signaling	1.42	0.118	-1	MTOR	mechanistic target of rapamycin	Nucleus	kinase	2.15174e-08	6.28984e-10	up	1.65752	1.65752	0.729023
Acute Myeloid Leukemia Signaling	1.42	0.118	-1	BAD	BCL2 associated agonist of cell death	Cytoplasm	other	1.34915e-08	3.45293e-10	up	1.5081	1.5081	0.59273
Acute Myeloid Leukemia Signaling	1.42	0.118	-1	PIK3C2A	phosphatidylinositol-4-phosphate 3-kinase catalytic subunit type 2 alpha	Cytoplasm	kinase	2.82584e-06	2.52843e-07	down	1.59286	-1.59286	-0.671617
Acute Myeloid Leukemia Signaling	1.42	0.118	-1	PIM1	Pim-1 proto-oncogene, serine/threonine kinase	Cytoplasm	kinase	1.93218e-08	5.51564e-10	down	2.57313	-2.57313	-1.36352
Acute Myeloid Leukemia Signaling	1.42	0.118	-1	MAPK3	mitogen-activated protein kinase 3	Cytoplasm	kinase	4.35448e-07	2.63697e-08	down	1.70674	-1.70674	-0.77124
Acute Myeloid Leukemia Signaling	1.42	0.118	-1	FGFR1	fibroblast growth factor receptor 1	Plasma Membrane	kinase	0.000247191	4.8071e-05	up	1.50868	1.50868	0.59329
Acute Myeloid Leukemia Signaling	1.42	0.118	-1	AKT3	AKT serine/threonine kinase 3	Cytoplasm	kinase	6.87797e-06	7.27745e-07	down	1.6577	-1.6577	-0.72918
Acute Myeloid Leukemia Signaling	1.42	0.118	-1	CCND1	cyclin D1	Nucleus	transcription regulator	6.00024e-10	5.95338e-12	down	2.30478	-2.30478	-1.20463
Acute Myeloid Leukemia Signaling	1.42	0.118	-1	MAP2K5	mitogen-activated protein kinase kinase 5	Cytoplasm	kinase	6.66854e-05	1.04964e-05	up	1.62147	1.62147	0.697307
Acute Myeloid Leukemia Signaling	1.42	0.118	-1	IDH1	isocitrate dehydrogenase (NADP(+)) 1, cytosolic	Cytoplasm	enzyme	1.51973e-08	4.04029e-10	up	1.50523	1.50523	0.589983
Netrin Signaling	1.42	0.154	NaN	PRKACB	protein kinase cAMP-activated catalytic subunit beta	Cytoplasm	kinase	3.85749e-08	1.31897e-09	down	2.07728	-2.07728	-1.0547
Netrin Signaling	1.42	0.154	NaN	PRKAR2B	protein kinase cAMP-dependent type II regulatory subunit beta	Cytoplasm	kinase	1.11727e-05	1.29359e-06	up	1.57564	1.57564	0.655937
Netrin Signaling	1.42	0.154	NaN	NFATC3	nuclear factor of activated T-cells 3	Nucleus	transcription regulator	2.44288e-06	2.1143e-07	down	1.71021	-1.71021	-0.77417
Netrin Signaling	1.42	0.154	NaN	PRKAR2A	protein kinase cAMP-dependent type II regulatory subunit alpha	Cytoplasm	kinase	1.6572e-09	2.35652e-11	up	1.61798	1.61798	0.694197
Netrin Signaling	1.42	0.154	NaN	NFATC2	nuclear factor of activated T-cells 2	Nucleus	transcription regulator	2.81161e-08	8.90543e-10	down	1.87801	-1.87801	-0.909203
Netrin Signaling	1.42	0.154	NaN	ENAH	enabled homolog (Drosophila)	Plasma Membrane	other	5.62723e-06	5.74791e-07	down	1.70464	-1.70464	-0.76947
Signaling by Rho Family GTPases	1.42	0.0952	-0.243	GNG4	G protein subunit gamma 4	Plasma Membrane	enzyme	2.89549e-05	3.96899e-06	down	1.50766	-1.50766	-0.592307
Signaling by Rho Family GTPases	1.42	0.0952	-0.243	ACTR2	ARP2 actin related protein 2 homolog	Plasma Membrane	other	4.47975e-11	1.56137e-13	down	2.38126	-2.38126	-1.25172
Signaling by Rho Family GTPases	1.42	0.0952	-0.243	NEDD4	neural precursor cell expressed, developmentally down-regulated 4, E3 ubiquitin protein ligase	Cytoplasm	enzyme	9.05081e-09	2.07464e-10	up	1.72618	1.72618	0.78758
Signaling by Rho Family GTPases	1.42	0.0952	-0.243	PIK3C2A	phosphatidylinositol-4-phosphate 3-kinase catalytic subunit type 2 alpha	Cytoplasm	kinase	2.82584e-06	2.52843e-07	down	1.59286	-1.59286	-0.671617
Signaling by Rho Family GTPases	1.42	0.0952	-0.243	FGFR1	fibroblast growth factor receptor 1	Plasma Membrane	kinase	0.000247191	4.8071e-05	up	1.50868	1.50868	0.59329
Signaling by Rho Family GTPases	1.42	0.0952	-0.243	GNA11	G protein subunit alpha 11	Plasma Membrane	enzyme	4.84133e-08	1.76622e-09	up	1.59017	1.59017	0.669177
Signaling by Rho Family GTPases	1.42	0.0952	-0.243	ITGA2	integrin subunit alpha 2	Plasma Membrane	transmembrane receptor	1.38403e-07	6.53158e-09	up	1.86016	1.86016	0.895423
Signaling by Rho Family GTPases	1.42	0.0952	-0.243	WASL	Wiskott-Aldrich syndrome like	Cytoplasm	other	9.38587e-08	4.01634e-09	up	1.60073	1.60073	0.678733
Signaling by Rho Family GTPases	1.42	0.0952	-0.243	GNB5	G protein subunit beta 5	Plasma Membrane	enzyme	3.71155e-06	3.49654e-07	down	1.5287	-1.5287	-0.612307
Signaling by Rho Family GTPases	1.42	0.0952	-0.243	ITGA5	integrin subunit alpha 5	Plasma Membrane	transmembrane receptor	2.35836e-10	1.66796e-12	down	2.56143	-2.56143	-1.35695
Signaling by Rho Family GTPases	1.42	0.0952	-0.243	PIP4K2B	phosphatidylinositol-5-phosphate 4-kinase type 2 beta	Cytoplasm	kinase	4.19788e-08	1.47519e-09	down	1.58895	-1.58895	-0.668073
Signaling by Rho Family GTPases	1.42	0.0952	-0.243	CLIP1	CAP-Gly domain containing linker protein 1	Cytoplasm	other	1.93793e-07	9.87033e-09	up	1.55926	1.55926	0.640863
Signaling by Rho Family GTPases	1.42	0.0952	-0.243	PIK3R3	phosphoinositide-3-kinase regulatory subunit 3	Cytoplasm	kinase	8.33611e-08	3.4717e-09	down	1.6323	-1.6323	-0.706907
Signaling by Rho Family GTPases	1.42	0.0952	-0.243	GNAI3	G protein subunit alpha i3	Cytoplasm	enzyme	1.09582e-07	4.92056e-09	down	1.51852	-1.51852	-0.602667
Signaling by Rho Family GTPases	1.42	0.0952	-0.243	GNB4	G protein subunit beta 4	Plasma Membrane	enzyme	2.91359e-06	2.6225e-07	down	1.9306	-1.9306	-0.949047
Signaling by Rho Family GTPases	1.42	0.0952	-0.243	CFL2	cofilin 2	Extracellular Space	other	1.08471e-11	2.31805e-14	down	2.63909	-2.63909	-1.40004
Signaling by Rho Family GTPases	1.42	0.0952	-0.243	CYFIP1	cytoplasmic FMR1 interacting protein 1	Cytoplasm	other	1.75788e-09	2.56425e-11	down	1.71894	-1.71894	-0.781523
Signaling by Rho Family GTPases	1.42	0.0952	-0.243	CDC42	cell division cycle 42	Cytoplasm	enzyme	7.68247e-08	3.11153e-09	up	1.53845	1.53845	0.621477
Signaling by Rho Family GTPases	1.42	0.0952	-0.243	MAPK3	mitogen-activated protein kinase 3	Cytoplasm	kinase	4.35448e-07	2.63697e-08	down	1.70674	-1.70674	-0.77124
Signaling by Rho Family GTPases	1.42	0.0952	-0.243	MAP3K20	mitogen-activated protein kinase kinase kinase 20	Cytoplasm	kinase	2.35875e-05	3.11204e-06	down	2.05369	-2.05369	-1.03822
Signaling by Rho Family GTPases	1.42	0.0952	-0.243	ARHGEF18	Rho/Rac guanine nucleotide exchange factor 18	Cytoplasm	other	4.17575e-08	1.46391e-09	up	1.55466	1.55466	0.6366
Signaling by Rho Family GTPases	1.42	0.0952	-0.243	FNBP1	formin binding protein 1	Nucleus	enzyme	1.3572e-06	1.05504e-07	up	1.82302	1.82302	0.866333
Signaling by Rho Family GTPases	1.42	0.0952	-0.243	PIP4K2C	phosphatidylinositol-5-phosphate 4-kinase type 2 gamma	Cytoplasm	kinase	1.35592e-09	1.82482e-11	down	1.8346	-1.8346	-0.875467
Signaling by Rho Family GTPases	1.42	0.0952	-0.243	SEPT2	septin 2	Cytoplasm	enzyme	2.09008e-11	5.63635e-14	up	2.29873	2.29873	1.20084
Phospholipase C Signaling	1.39	0.0954	-0.943	GNG4	G protein subunit gamma 4	Plasma Membrane	enzyme	2.89549e-05	3.96899e-06	down	1.50766	-1.50766	-0.592307
Phospholipase C Signaling	1.39	0.0954	-0.943	HDAC9	histone deacetylase 9	Nucleus	transcription regulator	5.91691e-05	9.14022e-06	up	1.76391	1.76391	0.818777
Phospholipase C Signaling	1.39	0.0954	-0.943	NAPEPLD	N-acyl phosphatidylethanolamine phospholipase D	Cytoplasm	enzyme	4.04913e-07	2.41565e-08	down	1.70998	-1.70998	-0.773983
Phospholipase C Signaling	1.39	0.0954	-0.943	HDAC4	histone deacetylase 4	Nucleus	transcription regulator	3.86368e-06	3.6767e-07	down	1.71516	-1.71516	-0.778347
Phospholipase C Signaling	1.39	0.0954	-0.943	HDAC8	histone deacetylase 8	Nucleus	transcription regulator	7.9917e-07	5.57286e-08	down	1.8522	-1.8522	-0.889243
Phospholipase C Signaling	1.39	0.0954	-0.943	NFATC3	nuclear factor of activated T-cells 3	Nucleus	transcription regulator	2.44288e-06	2.1143e-07	down	1.71021	-1.71021	-0.77417
Phospholipase C Signaling	1.39	0.0954	-0.943	ITGA2	integrin subunit alpha 2	Plasma Membrane	transmembrane receptor	1.38403e-07	6.53158e-09	up	1.86016	1.86016	0.895423
Phospholipase C Signaling	1.39	0.0954	-0.943	RALB	RAS like proto-oncogene B	Cytoplasm	enzyme	3.99931e-10	3.36778e-12	up	1.79067	1.79067	0.840503
Phospholipase C Signaling	1.39	0.0954	-0.943	GNB5	G protein subunit beta 5	Plasma Membrane	enzyme	3.71155e-06	3.49654e-07	down	1.5287	-1.5287	-0.612307
Phospholipase C Signaling	1.39	0.0954	-0.943	ITGA5	integrin subunit alpha 5	Plasma Membrane	transmembrane receptor	2.35836e-10	1.66796e-12	down	2.56143	-2.56143	-1.35695
Phospholipase C Signaling	1.39	0.0954	-0.943	CREB5	cAMP responsive element binding protein 5	Nucleus	transcription regulator	7.24769e-06	7.75162e-07	down	1.82782	-1.82782	-0.870123
Phospholipase C Signaling	1.39	0.0954	-0.943	RAP1A	RAP1A, member of RAS oncogene family	Cytoplasm	enzyme	1.35837e-14	3.45579e-19	down	2.46964	-2.46964	-1.3043
Phospholipase C Signaling	1.39	0.0954	-0.943	TGM2	transglutaminase 2	Cytoplasm	enzyme	5.62508e-10	5.40942e-12	up	1.61112	1.61112	0.688067
Phospholipase C Signaling	1.39	0.0954	-0.943	PLA2G4A	phospholipase A2 group IVA	Cytoplasm	enzyme	3.53697e-06	3.30328e-07	up	1.62024	1.62024	0.69621
Phospholipase C Signaling	1.39	0.0954	-0.943	GNB4	G protein subunit beta 4	Plasma Membrane	enzyme	2.91359e-06	2.6225e-07	down	1.9306	-1.9306	-0.949047
Phospholipase C Signaling	1.39	0.0954	-0.943	AHNAK	AHNAK nucleoprotein	Nucleus	other	5.49789e-08	2.06729e-09	down	1.82695	-1.82695	-0.869437
Phospholipase C Signaling	1.39	0.0954	-0.943	MAPK3	mitogen-activated protein kinase 3	Cytoplasm	kinase	4.35448e-07	2.63697e-08	down	1.70674	-1.70674	-0.77124
Phospholipase C Signaling	1.39	0.0954	-0.943	HDAC11	histone deacetylase 11	Nucleus	transcription regulator	2.48377e-07	1.3396e-08	up	1.67911	1.67911	0.7477
Phospholipase C Signaling	1.39	0.0954	-0.943	PRKCE	protein kinase C epsilon	Cytoplasm	kinase	5.22833e-10	4.84166e-12	down	2.01678	-2.01678	-1.01205
Phospholipase C Signaling	1.39	0.0954	-0.943	NFATC2	nuclear factor of activated T-cells 2	Nucleus	transcription regulator	2.81161e-08	8.90543e-10	down	1.87801	-1.87801	-0.909203
Phospholipase C Signaling	1.39	0.0954	-0.943	ARHGEF18	Rho/Rac guanine nucleotide exchange factor 18	Cytoplasm	other	4.17575e-08	1.46391e-09	up	1.55466	1.55466	0.6366
Phospholipase C Signaling	1.39	0.0954	-0.943	FNBP1	formin binding protein 1	Nucleus	enzyme	1.3572e-06	1.05504e-07	up	1.82302	1.82302	0.866333
Phospholipase C Signaling	1.39	0.0954	-0.943	PLA2G12A	phospholipase A2 group XIIA	Other	enzyme	9.14457e-06	1.02317e-06	up	1.60747	1.60747	0.68479
B Cell Receptor Signaling	1.38	0.0995	-1.147	ETS1	ETS proto-oncogene 1, transcription factor	Nucleus	transcription regulator	7.6565e-11	3.63023e-13	down	1.5292	-1.5292	-0.612773
B Cell Receptor Signaling	1.38	0.0995	-1.147	PIK3C2A	phosphatidylinositol-4-phosphate 3-kinase catalytic subunit type 2 alpha	Cytoplasm	kinase	2.82584e-06	2.52843e-07	down	1.59286	-1.59286	-0.671617
B Cell Receptor Signaling	1.38	0.0995	-1.147	BAD	BCL2 associated agonist of cell death	Cytoplasm	other	1.34915e-08	3.45293e-10	up	1.5081	1.5081	0.59273
B Cell Receptor Signaling	1.38	0.0995	-1.147	NFATC3	nuclear factor of activated T-cells 3	Nucleus	transcription regulator	2.44288e-06	2.1143e-07	down	1.71021	-1.71021	-0.77417
B Cell Receptor Signaling	1.38	0.0995	-1.147	FGFR1	fibroblast growth factor receptor 1	Plasma Membrane	kinase	0.000247191	4.8071e-05	up	1.50868	1.50868	0.59329
B Cell Receptor Signaling	1.38	0.0995	-1.147	PDPK1	3-phosphoinositide dependent protein kinase 1	Cytoplasm	kinase	1.1086e-07	4.99204e-09	up	1.65403	1.65403	0.725987
B Cell Receptor Signaling	1.38	0.0995	-1.147	CREB5	cAMP responsive element binding protein 5	Nucleus	transcription regulator	7.24769e-06	7.75162e-07	down	1.82782	-1.82782	-0.870123
B Cell Receptor Signaling	1.38	0.0995	-1.147	RAP1A	RAP1A, member of RAS oncogene family	Cytoplasm	enzyme	1.35837e-14	3.45579e-19	down	2.46964	-2.46964	-1.3043
B Cell Receptor Signaling	1.38	0.0995	-1.147	PTEN	phosphatase and tensin homolog	Cytoplasm	phosphatase	4.30522e-08	1.52354e-09	down	2.05755	-2.05755	-1.04093
B Cell Receptor Signaling	1.38	0.0995	-1.147	PIK3R3	phosphoinositide-3-kinase regulatory subunit 3	Cytoplasm	kinase	8.33611e-08	3.4717e-09	down	1.6323	-1.6323	-0.706907
B Cell Receptor Signaling	1.38	0.0995	-1.147	MTOR	mechanistic target of rapamycin	Nucleus	kinase	2.15174e-08	6.28984e-10	up	1.65752	1.65752	0.729023
B Cell Receptor Signaling	1.38	0.0995	-1.147	FOXO1	forkhead box O1	Nucleus	transcription regulator	1.76954e-08	4.93401e-10	down	1.83353	-1.83353	-0.87462
B Cell Receptor Signaling	1.38	0.0995	-1.147	CFL2	cofilin 2	Extracellular Space	other	1.08471e-11	2.31805e-14	down	2.63909	-2.63909	-1.40004
B Cell Receptor Signaling	1.38	0.0995	-1.147	CDC42	cell division cycle 42	Cytoplasm	enzyme	7.68247e-08	3.11153e-09	up	1.53845	1.53845	0.621477
B Cell Receptor Signaling	1.38	0.0995	-1.147	MAPK3	mitogen-activated protein kinase 3	Cytoplasm	kinase	4.35448e-07	2.63697e-08	down	1.70674	-1.70674	-0.77124
B Cell Receptor Signaling	1.38	0.0995	-1.147	PAG1	phosphoprotein membrane anchor with glycosphingolipid microdomains 1	Plasma Membrane	other	6.61035e-08	2.58481e-09	down	2.05496	-2.05496	-1.03911
B Cell Receptor Signaling	1.38	0.0995	-1.147	AKT3	AKT serine/threonine kinase 3	Cytoplasm	kinase	6.87797e-06	7.27745e-07	down	1.6577	-1.6577	-0.72918
B Cell Receptor Signaling	1.38	0.0995	-1.147	NFATC2	nuclear factor of activated T-cells 2	Nucleus	transcription regulator	2.81161e-08	8.90543e-10	down	1.87801	-1.87801	-0.909203
B Cell Receptor Signaling	1.38	0.0995	-1.147	GSK3B	glycogen synthase kinase 3 beta	Nucleus	kinase	2.55367e-07	1.38835e-08	up	1.64288	1.64288	0.71623
Sonic Hedgehog Signaling	1.38	0.167	-1.342	PRKACB	protein kinase cAMP-activated catalytic subunit beta	Cytoplasm	kinase	3.85749e-08	1.31897e-09	down	2.07728	-2.07728	-1.0547
Sonic Hedgehog Signaling	1.38	0.167	-1.342	GLI2	GLI family zinc finger 2	Nucleus	transcription regulator	1.94255e-05	2.48385e-06	down	1.5497	-1.5497	-0.631987
Sonic Hedgehog Signaling	1.38	0.167	-1.342	PRKAR2B	protein kinase cAMP-dependent type II regulatory subunit beta	Cytoplasm	kinase	1.11727e-05	1.29359e-06	up	1.57564	1.57564	0.655937
Sonic Hedgehog Signaling	1.38	0.167	-1.342	PRKAR2A	protein kinase cAMP-dependent type II regulatory subunit alpha	Cytoplasm	kinase	1.6572e-09	2.35652e-11	up	1.61798	1.61798	0.694197
Sonic Hedgehog Signaling	1.38	0.167	-1.342	GSK3B	glycogen synthase kinase 3 beta	Nucleus	kinase	2.55367e-07	1.38835e-08	up	1.64288	1.64288	0.71623
HIF1α Signaling	1.37	0.11	NaN	PIK3C2A	phosphatidylinositol-4-phosphate 3-kinase catalytic subunit type 2 alpha	Cytoplasm	kinase	2.82584e-06	2.52843e-07	down	1.59286	-1.59286	-0.671617
HIF1α Signaling	1.37	0.11	NaN	MMP3	matrix metallopeptidase 3	Extracellular Space	peptidase	4.25291e-06	4.11366e-07	down	2.59578	-2.59578	-1.37617
HIF1α Signaling	1.37	0.11	NaN	MMP14	matrix metallopeptidase 14	Extracellular Space	peptidase	5.54164e-06	5.6478e-07	down	1.52475	-1.52475	-0.608573
HIF1α Signaling	1.37	0.11	NaN	FGFR1	fibroblast growth factor receptor 1	Plasma Membrane	kinase	0.000247191	4.8071e-05	up	1.50868	1.50868	0.59329
HIF1α Signaling	1.37	0.11	NaN	MAPK6	mitogen-activated protein kinase 6	Cytoplasm	kinase	4.52212e-06	4.40282e-07	down	1.51355	-1.51355	-0.59794
HIF1α Signaling	1.37	0.11	NaN	VEGFC	vascular endothelial growth factor C	Extracellular Space	growth factor	3.58259e-08	1.19581e-09	down	1.61553	-1.61553	-0.692007
HIF1α Signaling	1.37	0.11	NaN	PIK3R3	phosphoinositide-3-kinase regulatory subunit 3	Cytoplasm	kinase	8.33611e-08	3.4717e-09	down	1.6323	-1.6323	-0.706907
HIF1α Signaling	1.37	0.11	NaN	EDN1	endothelin 1	Extracellular Space	cytokine	2.19861e-07	1.1584e-08	up	1.88989	1.88989	0.918303
HIF1α Signaling	1.37	0.11	NaN	SLC2A14	solute carrier family 2 member 14	Nucleus	transporter	8.52501e-09	1.93893e-10	down	2.58756	-2.58756	-1.37159
HIF1α Signaling	1.37	0.11	NaN	MAPK3	mitogen-activated protein kinase 3	Cytoplasm	kinase	4.35448e-07	2.63697e-08	down	1.70674	-1.70674	-0.77124
HIF1α Signaling	1.37	0.11	NaN	AKT3	AKT serine/threonine kinase 3	Cytoplasm	kinase	6.87797e-06	7.27745e-07	down	1.6577	-1.6577	-0.72918
HIF1α Signaling	1.37	0.11	NaN	HSP90AA1	heat shock protein 90 alpha family class A member 1	Cytoplasm	enzyme	7.40107e-10	7.894e-12	up	1.62731	1.62731	0.70249
HIF1α Signaling	1.37	0.11	NaN	VHL	von Hippel-Lindau tumor suppressor	Nucleus	transcription regulator	4.07837e-09	7.54312e-11	down	1.58979	-1.58979	-0.668833
Salvage Pathways of Pyrimidine Ribonucleotides	1.36	0.116	NaN	PIM1	Pim-1 proto-oncogene, serine/threonine kinase	Cytoplasm	kinase	1.93218e-08	5.51564e-10	down	2.57313	-2.57313	-1.36352
Salvage Pathways of Pyrimidine Ribonucleotides	1.36	0.116	NaN	MAPK3	mitogen-activated protein kinase 3	Cytoplasm	kinase	4.35448e-07	2.63697e-08	down	1.70674	-1.70674	-0.77124
Salvage Pathways of Pyrimidine Ribonucleotides	1.36	0.116	NaN	UPP1	uridine phosphorylase 1	Cytoplasm	enzyme	2.47349e-07	1.333e-08	down	1.64617	-1.64617	-0.719113
Salvage Pathways of Pyrimidine Ribonucleotides	1.36	0.116	NaN	NME2	NME/NM23 nucleoside diphosphate kinase 2	Nucleus	kinase	7.92947e-13	3.22771e-16	down	2.11244	-2.11244	-1.07891
Salvage Pathways of Pyrimidine Ribonucleotides	1.36	0.116	NaN	MAPK6	mitogen-activated protein kinase 6	Cytoplasm	kinase	4.52212e-06	4.40282e-07	down	1.51355	-1.51355	-0.59794
Salvage Pathways of Pyrimidine Ribonucleotides	1.36	0.116	NaN	CDK6	cyclin dependent kinase 6	Nucleus	kinase	1.75382e-10	1.12439e-12	down	1.96768	-1.96768	-0.976497
Salvage Pathways of Pyrimidine Ribonucleotides	1.36	0.116	NaN	PRKAA2	protein kinase AMP-activated catalytic subunit alpha 2	Cytoplasm	kinase	2.10783e-08	6.11859e-10	up	2.56896	2.56896	1.36119
Salvage Pathways of Pyrimidine Ribonucleotides	1.36	0.116	NaN	AK4	adenylate kinase 4	Cytoplasm	kinase	9.22241e-09	2.12336e-10	down	1.52524	-1.52524	-0.60904
Salvage Pathways of Pyrimidine Ribonucleotides	1.36	0.116	NaN	PRKCE	protein kinase C epsilon	Cytoplasm	kinase	5.22833e-10	4.84166e-12	down	2.01678	-2.01678	-1.01205
Salvage Pathways of Pyrimidine Ribonucleotides	1.36	0.116	NaN	ACVR2A	activin A receptor type 2A	Plasma Membrane	kinase	3.43638e-05	4.83717e-06	down	1.60096	-1.60096	-0.678933
Salvage Pathways of Pyrimidine Ribonucleotides	1.36	0.116	NaN	IRAK1	interleukin 1 receptor associated kinase 1	Plasma Membrane	kinase	8.27246e-10	9.38641e-12	up	1.94638	1.94638	0.960793
Breast Cancer Regulation by Stathmin1	1.35	0.0976	NaN	GNG4	G protein subunit gamma 4	Plasma Membrane	enzyme	2.89549e-05	3.96899e-06	down	1.50766	-1.50766	-0.592307
Breast Cancer Regulation by Stathmin1	1.35	0.0976	NaN	PRKACB	protein kinase cAMP-activated catalytic subunit beta	Cytoplasm	kinase	3.85749e-08	1.31897e-09	down	2.07728	-2.07728	-1.0547
Breast Cancer Regulation by Stathmin1	1.35	0.0976	NaN	CCNE2	cyclin E2	Nucleus	other	2.45101e-09	4.01569e-11	down	1.80926	-1.80926	-0.855403
Breast Cancer Regulation by Stathmin1	1.35	0.0976	NaN	PIK3C2A	phosphatidylinositol-4-phosphate 3-kinase catalytic subunit type 2 alpha	Cytoplasm	kinase	2.82584e-06	2.52843e-07	down	1.59286	-1.59286	-0.671617
Breast Cancer Regulation by Stathmin1	1.35	0.0976	NaN	FGFR1	fibroblast growth factor receptor 1	Plasma Membrane	kinase	0.000247191	4.8071e-05	up	1.50868	1.50868	0.59329
Breast Cancer Regulation by Stathmin1	1.35	0.0976	NaN	PRKAR2A	protein kinase cAMP-dependent type II regulatory subunit alpha	Cytoplasm	kinase	1.6572e-09	2.35652e-11	up	1.61798	1.61798	0.694197
Breast Cancer Regulation by Stathmin1	1.35	0.0976	NaN	GNB5	G protein subunit beta 5	Plasma Membrane	enzyme	3.71155e-06	3.49654e-07	down	1.5287	-1.5287	-0.612307
Breast Cancer Regulation by Stathmin1	1.35	0.0976	NaN	TSG101	tumor susceptibility 101	Cytoplasm	transcription regulator	7.41641e-09	1.63962e-10	down	1.56909	-1.56909	-0.649927
Breast Cancer Regulation by Stathmin1	1.35	0.0976	NaN	PPP2R5A	protein phosphatase 2 regulatory subunit B'alpha	Cytoplasm	phosphatase	4.36257e-10	3.81011e-12	up	1.99923	1.99923	0.999443
Breast Cancer Regulation by Stathmin1	1.35	0.0976	NaN	PIK3R3	phosphoinositide-3-kinase regulatory subunit 3	Cytoplasm	kinase	8.33611e-08	3.4717e-09	down	1.6323	-1.6323	-0.706907
Breast Cancer Regulation by Stathmin1	1.35	0.0976	NaN	GNB4	G protein subunit beta 4	Plasma Membrane	enzyme	2.91359e-06	2.6225e-07	down	1.9306	-1.9306	-0.949047
Breast Cancer Regulation by Stathmin1	1.35	0.0976	NaN	GNAI3	G protein subunit alpha i3	Cytoplasm	enzyme	1.09582e-07	4.92056e-09	down	1.51852	-1.51852	-0.602667
Breast Cancer Regulation by Stathmin1	1.35	0.0976	NaN	TUBA1A	tubulin alpha 1a	Cytoplasm	other	5.82833e-09	1.18918e-10	up	1.53405	1.53405	0.617343
Breast Cancer Regulation by Stathmin1	1.35	0.0976	NaN	PRKAR2B	protein kinase cAMP-dependent type II regulatory subunit beta	Cytoplasm	kinase	1.11727e-05	1.29359e-06	up	1.57564	1.57564	0.655937
Breast Cancer Regulation by Stathmin1	1.35	0.0976	NaN	CDC42	cell division cycle 42	Cytoplasm	enzyme	7.68247e-08	3.11153e-09	up	1.53845	1.53845	0.621477
Breast Cancer Regulation by Stathmin1	1.35	0.0976	NaN	PPP1R7	protein phosphatase 1 regulatory subunit 7	Nucleus	phosphatase	1.91811e-08	5.46051e-10	up	1.51893	1.51893	0.603057
Breast Cancer Regulation by Stathmin1	1.35	0.0976	NaN	MAPK3	mitogen-activated protein kinase 3	Cytoplasm	kinase	4.35448e-07	2.63697e-08	down	1.70674	-1.70674	-0.77124
Breast Cancer Regulation by Stathmin1	1.35	0.0976	NaN	PRKCE	protein kinase C epsilon	Cytoplasm	kinase	5.22833e-10	4.84166e-12	down	2.01678	-2.01678	-1.01205
Breast Cancer Regulation by Stathmin1	1.35	0.0976	NaN	ARHGEF18	Rho/Rac guanine nucleotide exchange factor 18	Cytoplasm	other	4.17575e-08	1.46391e-09	up	1.55466	1.55466	0.6366
Breast Cancer Regulation by Stathmin1	1.35	0.0976	NaN	PPP2R1B	protein phosphatase 2 scaffold subunit Abeta	Plasma Membrane	phosphatase	1.07505e-10	5.86427e-13	down	3.55737	-3.55737	-1.83081
Human Embryonic Stem Cell Pluripotency	1.35	0.105	NaN	SMAD2	SMAD family member 2	Nucleus	transcription regulator	1.4095e-06	1.10481e-07	up	1.52286	1.52286	0.606787
Human Embryonic Stem Cell Pluripotency	1.35	0.105	NaN	WNT3	Wnt family member 3	Extracellular Space	other	1.4617e-05	1.78124e-06	down	1.50754	-1.50754	-0.5922
Human Embryonic Stem Cell Pluripotency	1.35	0.105	NaN	PIK3C2A	phosphatidylinositol-4-phosphate 3-kinase catalytic subunit type 2 alpha	Cytoplasm	kinase	2.82584e-06	2.52843e-07	down	1.59286	-1.59286	-0.671617
Human Embryonic Stem Cell Pluripotency	1.35	0.105	NaN	FGFR1	fibroblast growth factor receptor 1	Plasma Membrane	kinase	0.000247191	4.8071e-05	up	1.50868	1.50868	0.59329
Human Embryonic Stem Cell Pluripotency	1.35	0.105	NaN	SMAD6	SMAD family member 6	Nucleus	transcription regulator	0.000169527	3.1083e-05	down	1.53174	-1.53174	-0.615173
Human Embryonic Stem Cell Pluripotency	1.35	0.105	NaN	PDPK1	3-phosphoinositide dependent protein kinase 1	Cytoplasm	kinase	1.1086e-07	4.99204e-09	up	1.65403	1.65403	0.725987
Human Embryonic Stem Cell Pluripotency	1.35	0.105	NaN	SMAD5	SMAD family member 5	Nucleus	transcription regulator	2.78306e-08	8.78668e-10	down	1.68691	-1.68691	-0.754387
Human Embryonic Stem Cell Pluripotency	1.35	0.105	NaN	NGF	nerve growth factor	Extracellular Space	growth factor	3.4574e-09	6.13073e-11	down	2.06288	-2.06288	-1.04466
Human Embryonic Stem Cell Pluripotency	1.35	0.105	NaN	PDGFB	platelet derived growth factor subunit B	Extracellular Space	growth factor	7.58112e-09	1.67989e-10	down	1.56623	-1.56623	-0.647293
Human Embryonic Stem Cell Pluripotency	1.35	0.105	NaN	INHBA	inhibin beta A subunit	Extracellular Space	growth factor	2.45367e-06	2.12503e-07	up	1.56266	1.56266	0.644
Human Embryonic Stem Cell Pluripotency	1.35	0.105	NaN	PIK3R3	phosphoinositide-3-kinase regulatory subunit 3	Cytoplasm	kinase	8.33611e-08	3.4717e-09	down	1.6323	-1.6323	-0.706907
Human Embryonic Stem Cell Pluripotency	1.35	0.105	NaN	FOXO1	forkhead box O1	Nucleus	transcription regulator	1.76954e-08	4.93401e-10	down	1.83353	-1.83353	-0.87462
Human Embryonic Stem Cell Pluripotency	1.35	0.105	NaN	AKT3	AKT serine/threonine kinase 3	Cytoplasm	kinase	6.87797e-06	7.27745e-07	down	1.6577	-1.6577	-0.72918
Human Embryonic Stem Cell Pluripotency	1.35	0.105	NaN	GSK3B	glycogen synthase kinase 3 beta	Nucleus	kinase	2.55367e-07	1.38835e-08	up	1.64288	1.64288	0.71623
Human Embryonic Stem Cell Pluripotency	1.35	0.105	NaN	WNT5A	Wnt family member 5A	Extracellular Space	cytokine	1.19558e-06	9.04282e-08	down	1.68529	-1.68529	-0.752993
Calcium Signaling	1.35	0.1	-1.667	PRKACB	protein kinase cAMP-activated catalytic subunit beta	Cytoplasm	kinase	3.85749e-08	1.31897e-09	down	2.07728	-2.07728	-1.0547
Calcium Signaling	1.35	0.1	-1.667	HDAC9	histone deacetylase 9	Nucleus	transcription regulator	5.91691e-05	9.14022e-06	up	1.76391	1.76391	0.818777
Calcium Signaling	1.35	0.1	-1.667	HDAC4	histone deacetylase 4	Nucleus	transcription regulator	3.86368e-06	3.6767e-07	down	1.71516	-1.71516	-0.778347
Calcium Signaling	1.35	0.1	-1.667	HDAC8	histone deacetylase 8	Nucleus	transcription regulator	7.9917e-07	5.57286e-08	down	1.8522	-1.8522	-0.889243
Calcium Signaling	1.35	0.1	-1.667	ATP2B1	ATPase plasma membrane Ca2+ transporting 1	Plasma Membrane	transporter	0.000119681	2.07166e-05	down	1.50822	-1.50822	-0.592843
Calcium Signaling	1.35	0.1	-1.667	NFATC3	nuclear factor of activated T-cells 3	Nucleus	transcription regulator	2.44288e-06	2.1143e-07	down	1.71021	-1.71021	-0.77417
Calcium Signaling	1.35	0.1	-1.667	PRKAR2A	protein kinase cAMP-dependent type II regulatory subunit alpha	Cytoplasm	kinase	1.6572e-09	2.35652e-11	up	1.61798	1.61798	0.694197
Calcium Signaling	1.35	0.1	-1.667	TPM3	tropomyosin 3	Cytoplasm	other	3.61729e-08	1.21015e-09	down	1.86058	-1.86058	-0.895753
Calcium Signaling	1.35	0.1	-1.667	TPM1	tropomyosin 1 (alpha)	Cytoplasm	other	9.70066e-10	1.14758e-11	down	1.9323	-1.9323	-0.95032
Calcium Signaling	1.35	0.1	-1.667	CREB5	cAMP responsive element binding protein 5	Nucleus	transcription regulator	7.24769e-06	7.75162e-07	down	1.82782	-1.82782	-0.870123
Calcium Signaling	1.35	0.1	-1.667	RAP1A	RAP1A, member of RAS oncogene family	Cytoplasm	enzyme	1.35837e-14	3.45579e-19	down	2.46964	-2.46964	-1.3043
Calcium Signaling	1.35	0.1	-1.667	PRKAR2B	protein kinase cAMP-dependent type II regulatory subunit beta	Cytoplasm	kinase	1.11727e-05	1.29359e-06	up	1.57564	1.57564	0.655937
Calcium Signaling	1.35	0.1	-1.667	MAPK3	mitogen-activated protein kinase 3	Cytoplasm	kinase	4.35448e-07	2.63697e-08	down	1.70674	-1.70674	-0.77124
Calcium Signaling	1.35	0.1	-1.667	HDAC11	histone deacetylase 11	Nucleus	transcription regulator	2.48377e-07	1.3396e-08	up	1.67911	1.67911	0.7477
Calcium Signaling	1.35	0.1	-1.667	NFATC2	nuclear factor of activated T-cells 2	Nucleus	transcription regulator	2.81161e-08	8.90543e-10	down	1.87801	-1.87801	-0.909203
Calcium Signaling	1.35	0.1	-1.667	ASPH	aspartate beta-hydroxylase	Cytoplasm	enzyme	1.16003e-07	5.2679e-09	up	1.61509	1.61509	0.691613
Calcium Signaling	1.35	0.1	-1.667	TPM4	tropomyosin 4	Cytoplasm	other	5.1765e-10	4.78049e-12	down	3.37685	-3.37685	-1.75568
Calcium Signaling	1.35	0.1	-1.667	SLC8A1	solute carrier family 8 member A1	Plasma Membrane	transporter	2.04622e-08	5.91891e-10	down	2.18154	-2.18154	-1.12535
Aldosterone Signaling in Epithelial Cells	1.34	0.101	-1.265	NEDD4	neural precursor cell expressed, developmentally down-regulated 4, E3 ubiquitin protein ligase	Cytoplasm	enzyme	9.05081e-09	2.07464e-10	up	1.72618	1.72618	0.78758
Aldosterone Signaling in Epithelial Cells	1.34	0.101	-1.265	PIK3C2A	phosphatidylinositol-4-phosphate 3-kinase catalytic subunit type 2 alpha	Cytoplasm	kinase	2.82584e-06	2.52843e-07	down	1.59286	-1.59286	-0.671617
Aldosterone Signaling in Epithelial Cells	1.34	0.101	-1.265	FGFR1	fibroblast growth factor receptor 1	Plasma Membrane	kinase	0.000247191	4.8071e-05	up	1.50868	1.50868	0.59329
Aldosterone Signaling in Epithelial Cells	1.34	0.101	-1.265	DNAJC27	DnaJ heat shock protein family (Hsp40) member C27	Cytoplasm	enzyme	2.60749e-07	1.42358e-08	down	2.22876	-2.22876	-1.15624
Aldosterone Signaling in Epithelial Cells	1.34	0.101	-1.265	DNAJC19	DnaJ heat shock protein family (Hsp40) member C19	Cytoplasm	other	8.70191e-06	9.6609e-07	down	1.58634	-1.58634	-0.6657
Aldosterone Signaling in Epithelial Cells	1.34	0.101	-1.265	PIP4K2B	phosphatidylinositol-5-phosphate 4-kinase type 2 beta	Cytoplasm	kinase	4.19788e-08	1.47519e-09	down	1.58895	-1.58895	-0.668073
Aldosterone Signaling in Epithelial Cells	1.34	0.101	-1.265	PDPK1	3-phosphoinositide dependent protein kinase 1	Cytoplasm	kinase	1.1086e-07	4.99204e-09	up	1.65403	1.65403	0.725987
Aldosterone Signaling in Epithelial Cells	1.34	0.101	-1.265	DNAJC15	DnaJ heat shock protein family (Hsp40) member C15	Cytoplasm	other	1.47641e-06	1.16992e-07	down	1.78116	-1.78116	-0.832813
Aldosterone Signaling in Epithelial Cells	1.34	0.101	-1.265	DNAJB9	DnaJ heat shock protein family (Hsp40) member B9	Nucleus	other	6.39291e-08	2.4884e-09	down	1.85901	-1.85901	-0.894533
Aldosterone Signaling in Epithelial Cells	1.34	0.101	-1.265	PIK3R3	phosphoinositide-3-kinase regulatory subunit 3	Cytoplasm	kinase	8.33611e-08	3.4717e-09	down	1.6323	-1.6323	-0.706907
Aldosterone Signaling in Epithelial Cells	1.34	0.101	-1.265	HSPA4	heat shock protein family A (Hsp70) member 4	Cytoplasm	other	9.11694e-08	3.87343e-09	down	1.56611	-1.56611	-0.64719
Aldosterone Signaling in Epithelial Cells	1.34	0.101	-1.265	MAPK3	mitogen-activated protein kinase 3	Cytoplasm	kinase	4.35448e-07	2.63697e-08	down	1.70674	-1.70674	-0.77124
Aldosterone Signaling in Epithelial Cells	1.34	0.101	-1.265	ASIC1	acid sensing ion channel subunit 1	Plasma Membrane	ion channel	8.52179e-08	3.57071e-09	up	1.69357	1.69357	0.760067
Aldosterone Signaling in Epithelial Cells	1.34	0.101	-1.265	HSPA13	heat shock protein family A (Hsp70) member 13	Cytoplasm	other	6.08138e-06	6.29535e-07	down	1.57355	-1.57355	-0.65402
Aldosterone Signaling in Epithelial Cells	1.34	0.101	-1.265	HSP90AA1	heat shock protein 90 alpha family class A member 1	Cytoplasm	enzyme	7.40107e-10	7.894e-12	up	1.62731	1.62731	0.70249
Aldosterone Signaling in Epithelial Cells	1.34	0.101	-1.265	PRKCE	protein kinase C epsilon	Cytoplasm	kinase	5.22833e-10	4.84166e-12	down	2.01678	-2.01678	-1.01205
Aldosterone Signaling in Epithelial Cells	1.34	0.101	-1.265	PIP4K2C	phosphatidylinositol-5-phosphate 4-kinase type 2 gamma	Cytoplasm	kinase	1.35592e-09	1.82482e-11	down	1.8346	-1.8346	-0.875467
Ephrin B Signaling	1.34	0.123	0	GNG4	G protein subunit gamma 4	Plasma Membrane	enzyme	2.89549e-05	3.96899e-06	down	1.50766	-1.50766	-0.592307
Ephrin B Signaling	1.34	0.123	0	GNAI3	G protein subunit alpha i3	Cytoplasm	enzyme	1.09582e-07	4.92056e-09	down	1.51852	-1.51852	-0.602667
Ephrin B Signaling	1.34	0.123	0	GNB4	G protein subunit beta 4	Plasma Membrane	enzyme	2.91359e-06	2.6225e-07	down	1.9306	-1.9306	-0.949047
Ephrin B Signaling	1.34	0.123	0	CFL2	cofilin 2	Extracellular Space	other	1.08471e-11	2.31805e-14	down	2.63909	-2.63909	-1.40004
Ephrin B Signaling	1.34	0.123	0	CDC42	cell division cycle 42	Cytoplasm	enzyme	7.68247e-08	3.11153e-09	up	1.53845	1.53845	0.621477
Ephrin B Signaling	1.34	0.123	0	MAPK3	mitogen-activated protein kinase 3	Cytoplasm	kinase	4.35448e-07	2.63697e-08	down	1.70674	-1.70674	-0.77124
Ephrin B Signaling	1.34	0.123	0	GNA11	G protein subunit alpha 11	Plasma Membrane	enzyme	4.84133e-08	1.76622e-09	up	1.59017	1.59017	0.669177
Ephrin B Signaling	1.34	0.123	0	GNB5	G protein subunit beta 5	Plasma Membrane	enzyme	3.71155e-06	3.49654e-07	down	1.5287	-1.5287	-0.612307
Ephrin B Signaling	1.34	0.123	0	ITSN2	intersectin 2	Cytoplasm	other	5.02527e-08	1.85633e-09	down	1.70897	-1.70897	-0.77313
GM-CSF Signaling	1.34	0.123	-1.667	ETS1	ETS proto-oncogene 1, transcription factor	Nucleus	transcription regulator	7.6565e-11	3.63023e-13	down	1.5292	-1.5292	-0.612773
GM-CSF Signaling	1.34	0.123	-1.667	PIK3R3	phosphoinositide-3-kinase regulatory subunit 3	Cytoplasm	kinase	8.33611e-08	3.4717e-09	down	1.6323	-1.6323	-0.706907
GM-CSF Signaling	1.34	0.123	-1.667	PIK3C2A	phosphatidylinositol-4-phosphate 3-kinase catalytic subunit type 2 alpha	Cytoplasm	kinase	2.82584e-06	2.52843e-07	down	1.59286	-1.59286	-0.671617
GM-CSF Signaling	1.34	0.123	-1.667	PIM1	Pim-1 proto-oncogene, serine/threonine kinase	Cytoplasm	kinase	1.93218e-08	5.51564e-10	down	2.57313	-2.57313	-1.36352
GM-CSF Signaling	1.34	0.123	-1.667	MAPK3	mitogen-activated protein kinase 3	Cytoplasm	kinase	4.35448e-07	2.63697e-08	down	1.70674	-1.70674	-0.77124
GM-CSF Signaling	1.34	0.123	-1.667	FGFR1	fibroblast growth factor receptor 1	Plasma Membrane	kinase	0.000247191	4.8071e-05	up	1.50868	1.50868	0.59329
GM-CSF Signaling	1.34	0.123	-1.667	AKT3	AKT serine/threonine kinase 3	Cytoplasm	kinase	6.87797e-06	7.27745e-07	down	1.6577	-1.6577	-0.72918
GM-CSF Signaling	1.34	0.123	-1.667	CSF2	colony stimulating factor 2	Extracellular Space	cytokine	7.85927e-07	5.44653e-08	down	1.51009	-1.51009	-0.594633
GM-CSF Signaling	1.34	0.123	-1.667	CCND1	cyclin D1	Nucleus	transcription regulator	6.00024e-10	5.95338e-12	down	2.30478	-2.30478	-1.20463
Glycogen Degradation II	1.32	0.231	NaN	PGM2L1	phosphoglucomutase 2 like 1	Cytoplasm	enzyme	7.3361e-12	1.14345e-14	down	4.30155	-4.30155	-2.10486
Glycogen Degradation II	1.32	0.231	NaN	PYGL	glycogen phosphorylase L	Cytoplasm	enzyme	2.65184e-08	8.23747e-10	up	1.50451	1.50451	0.589293
Glycogen Degradation II	1.32	0.231	NaN	MTAP	methylthioadenosine phosphorylase	Nucleus	enzyme	1.20471e-07	5.51062e-09	down	1.59083	-1.59083	-0.66978
Relaxin Signaling	1.31	0.102	-0.632	GNG4	G protein subunit gamma 4	Plasma Membrane	enzyme	2.89549e-05	3.96899e-06	down	1.50766	-1.50766	-0.592307
Relaxin Signaling	1.31	0.102	-0.632	PRKACB	protein kinase cAMP-activated catalytic subunit beta	Cytoplasm	kinase	3.85749e-08	1.31897e-09	down	2.07728	-2.07728	-1.0547
Relaxin Signaling	1.31	0.102	-0.632	NAPEPLD	N-acyl phosphatidylethanolamine phospholipase D	Cytoplasm	enzyme	4.04913e-07	2.41565e-08	down	1.70998	-1.70998	-0.773983
Relaxin Signaling	1.31	0.102	-0.632	PIK3C2A	phosphatidylinositol-4-phosphate 3-kinase catalytic subunit type 2 alpha	Cytoplasm	kinase	2.82584e-06	2.52843e-07	down	1.59286	-1.59286	-0.671617
Relaxin Signaling	1.31	0.102	-0.632	FGFR1	fibroblast growth factor receptor 1	Plasma Membrane	kinase	0.000247191	4.8071e-05	up	1.50868	1.50868	0.59329
Relaxin Signaling	1.31	0.102	-0.632	GNA11	G protein subunit alpha 11	Plasma Membrane	enzyme	4.84133e-08	1.76622e-09	up	1.59017	1.59017	0.669177
Relaxin Signaling	1.31	0.102	-0.632	PRKAR2A	protein kinase cAMP-dependent type II regulatory subunit alpha	Cytoplasm	kinase	1.6572e-09	2.35652e-11	up	1.61798	1.61798	0.694197
Relaxin Signaling	1.31	0.102	-0.632	GNB5	G protein subunit beta 5	Plasma Membrane	enzyme	3.71155e-06	3.49654e-07	down	1.5287	-1.5287	-0.612307
Relaxin Signaling	1.31	0.102	-0.632	RAP1A	RAP1A, member of RAS oncogene family	Cytoplasm	enzyme	1.35837e-14	3.45579e-19	down	2.46964	-2.46964	-1.3043
Relaxin Signaling	1.31	0.102	-0.632	PIK3R3	phosphoinositide-3-kinase regulatory subunit 3	Cytoplasm	kinase	8.33611e-08	3.4717e-09	down	1.6323	-1.6323	-0.706907
Relaxin Signaling	1.31	0.102	-0.632	GNB4	G protein subunit beta 4	Plasma Membrane	enzyme	2.91359e-06	2.6225e-07	down	1.9306	-1.9306	-0.949047
Relaxin Signaling	1.31	0.102	-0.632	GNAI3	G protein subunit alpha i3	Cytoplasm	enzyme	1.09582e-07	4.92056e-09	down	1.51852	-1.51852	-0.602667
Relaxin Signaling	1.31	0.102	-0.632	PRKAR2B	protein kinase cAMP-dependent type II regulatory subunit beta	Cytoplasm	kinase	1.11727e-05	1.29359e-06	up	1.57564	1.57564	0.655937
Relaxin Signaling	1.31	0.102	-0.632	NPR3	natriuretic peptide receptor 3	Plasma Membrane	G-protein coupled receptor	1.84754e-05	2.34497e-06	up	1.51002	1.51002	0.594563
Relaxin Signaling	1.31	0.102	-0.632	MAPK3	mitogen-activated protein kinase 3	Cytoplasm	kinase	4.35448e-07	2.63697e-08	down	1.70674	-1.70674	-0.77124
Relaxin Signaling	1.31	0.102	-0.632	AKT3	AKT serine/threonine kinase 3	Cytoplasm	kinase	6.87797e-06	7.27745e-07	down	1.6577	-1.6577	-0.72918
STAT3 Pathway	1.31	0.122	-1.667	GHR	growth hormone receptor	Plasma Membrane	transmembrane receptor	8.7072e-06	9.66925e-07	down	1.55949	-1.55949	-0.641077
STAT3 Pathway	1.31	0.122	-1.667	PTPN2	protein tyrosine phosphatase, non-receptor type 2	Cytoplasm	phosphatase	1.86738e-07	9.44925e-09	down	1.88027	-1.88027	-0.910937
STAT3 Pathway	1.31	0.122	-1.667	PIM1	Pim-1 proto-oncogene, serine/threonine kinase	Cytoplasm	kinase	1.93218e-08	5.51564e-10	down	2.57313	-2.57313	-1.36352
STAT3 Pathway	1.31	0.122	-1.667	MAPK3	mitogen-activated protein kinase 3	Cytoplasm	kinase	4.35448e-07	2.63697e-08	down	1.70674	-1.70674	-0.77124
STAT3 Pathway	1.31	0.122	-1.667	FGFR1	fibroblast growth factor receptor 1	Plasma Membrane	kinase	0.000247191	4.8071e-05	up	1.50868	1.50868	0.59329
STAT3 Pathway	1.31	0.122	-1.667	MAP3K20	mitogen-activated protein kinase kinase kinase 20	Cytoplasm	kinase	2.35875e-05	3.11204e-06	down	2.05369	-2.05369	-1.03822
STAT3 Pathway	1.31	0.122	-1.667	IGF2R	insulin like growth factor 2 receptor	Plasma Membrane	transmembrane receptor	1.6572e-09	2.36166e-11	down	1.92668	-1.92668	-0.946113
STAT3 Pathway	1.31	0.122	-1.667	CDC25A	cell division cycle 25A	Nucleus	phosphatase	2.09251e-08	6.0688e-10	down	1.72289	-1.72289	-0.784827
STAT3 Pathway	1.31	0.122	-1.667	EGFR	epidermal growth factor receptor	Plasma Membrane	kinase	7.80544e-08	3.18516e-09	down	1.65723	-1.65723	-0.728773
CNTF Signaling	1.3	0.127	-1.414	IL6ST	interleukin 6 signal transducer	Plasma Membrane	transmembrane receptor	6.03046e-08	2.32431e-09	down	1.62111	-1.62111	-0.696983
CNTF Signaling	1.3	0.127	-1.414	PIK3R3	phosphoinositide-3-kinase regulatory subunit 3	Cytoplasm	kinase	8.33611e-08	3.4717e-09	down	1.6323	-1.6323	-0.706907
CNTF Signaling	1.3	0.127	-1.414	MTOR	mechanistic target of rapamycin	Nucleus	kinase	2.15174e-08	6.28984e-10	up	1.65752	1.65752	0.729023
CNTF Signaling	1.3	0.127	-1.414	JAK1	Janus kinase 1	Cytoplasm	kinase	1.06066e-06	7.81996e-08	down	1.54581	-1.54581	-0.62836
CNTF Signaling	1.3	0.127	-1.414	PIK3C2A	phosphatidylinositol-4-phosphate 3-kinase catalytic subunit type 2 alpha	Cytoplasm	kinase	2.82584e-06	2.52843e-07	down	1.59286	-1.59286	-0.671617
CNTF Signaling	1.3	0.127	-1.414	MAPK3	mitogen-activated protein kinase 3	Cytoplasm	kinase	4.35448e-07	2.63697e-08	down	1.70674	-1.70674	-0.77124
CNTF Signaling	1.3	0.127	-1.414	FGFR1	fibroblast growth factor receptor 1	Plasma Membrane	kinase	0.000247191	4.8071e-05	up	1.50868	1.50868	0.59329
CNTF Signaling	1.3	0.127	-1.414	RPS6KA1	ribosomal protein S6 kinase A1	Cytoplasm	kinase	3.83157e-08	1.30677e-09	down	1.61813	-1.61813	-0.694327
Leptin Signaling in Obesity	1.29	0.116	-0.378	PRKACB	protein kinase cAMP-activated catalytic subunit beta	Cytoplasm	kinase	3.85749e-08	1.31897e-09	down	2.07728	-2.07728	-1.0547
Leptin Signaling in Obesity	1.29	0.116	-0.378	PIK3R3	phosphoinositide-3-kinase regulatory subunit 3	Cytoplasm	kinase	8.33611e-08	3.4717e-09	down	1.6323	-1.6323	-0.706907
Leptin Signaling in Obesity	1.29	0.116	-0.378	PRKAR2B	protein kinase cAMP-dependent type II regulatory subunit beta	Cytoplasm	kinase	1.11727e-05	1.29359e-06	up	1.57564	1.57564	0.655937
Leptin Signaling in Obesity	1.29	0.116	-0.378	FOXO1	forkhead box O1	Nucleus	transcription regulator	1.76954e-08	4.93401e-10	down	1.83353	-1.83353	-0.87462
Leptin Signaling in Obesity	1.29	0.116	-0.378	PIK3C2A	phosphatidylinositol-4-phosphate 3-kinase catalytic subunit type 2 alpha	Cytoplasm	kinase	2.82584e-06	2.52843e-07	down	1.59286	-1.59286	-0.671617
Leptin Signaling in Obesity	1.29	0.116	-0.378	LEPR	leptin receptor	Plasma Membrane	transmembrane receptor	2.11852e-10	1.46061e-12	up	2.59538	2.59538	1.37595
Leptin Signaling in Obesity	1.29	0.116	-0.378	MAPK3	mitogen-activated protein kinase 3	Cytoplasm	kinase	4.35448e-07	2.63697e-08	down	1.70674	-1.70674	-0.77124
Leptin Signaling in Obesity	1.29	0.116	-0.378	FGFR1	fibroblast growth factor receptor 1	Plasma Membrane	kinase	0.000247191	4.8071e-05	up	1.50868	1.50868	0.59329
Leptin Signaling in Obesity	1.29	0.116	-0.378	PRKAR2A	protein kinase cAMP-dependent type II regulatory subunit alpha	Cytoplasm	kinase	1.6572e-09	2.35652e-11	up	1.61798	1.61798	0.694197
Leptin Signaling in Obesity	1.29	0.116	-0.378	AKT3	AKT serine/threonine kinase 3	Cytoplasm	kinase	6.87797e-06	7.27745e-07	down	1.6577	-1.6577	-0.72918
NF-κB Activation by Viruses	1.26	0.115	-1.897	PIK3R3	phosphoinositide-3-kinase regulatory subunit 3	Cytoplasm	kinase	8.33611e-08	3.4717e-09	down	1.6323	-1.6323	-0.706907
NF-κB Activation by Viruses	1.26	0.115	-1.897	PIK3C2A	phosphatidylinositol-4-phosphate 3-kinase catalytic subunit type 2 alpha	Cytoplasm	kinase	2.82584e-06	2.52843e-07	down	1.59286	-1.59286	-0.671617
NF-κB Activation by Viruses	1.26	0.115	-1.897	MAPK3	mitogen-activated protein kinase 3	Cytoplasm	kinase	4.35448e-07	2.63697e-08	down	1.70674	-1.70674	-0.77124
NF-κB Activation by Viruses	1.26	0.115	-1.897	FGFR1	fibroblast growth factor receptor 1	Plasma Membrane	kinase	0.000247191	4.8071e-05	up	1.50868	1.50868	0.59329
NF-κB Activation by Viruses	1.26	0.115	-1.897	ITGA2	integrin subunit alpha 2	Plasma Membrane	transmembrane receptor	1.38403e-07	6.53158e-09	up	1.86016	1.86016	0.895423
NF-κB Activation by Viruses	1.26	0.115	-1.897	ITGA6	integrin subunit alpha 6	Plasma Membrane	transmembrane receptor	4.16708e-10	3.60446e-12	down	1.9976	-1.9976	-0.99827
NF-κB Activation by Viruses	1.26	0.115	-1.897	ITGA5	integrin subunit alpha 5	Plasma Membrane	transmembrane receptor	2.35836e-10	1.66796e-12	down	2.56143	-2.56143	-1.35695
NF-κB Activation by Viruses	1.26	0.115	-1.897	AKT3	AKT serine/threonine kinase 3	Cytoplasm	kinase	6.87797e-06	7.27745e-07	down	1.6577	-1.6577	-0.72918
NF-κB Activation by Viruses	1.26	0.115	-1.897	PRKCE	protein kinase C epsilon	Cytoplasm	kinase	5.22833e-10	4.84166e-12	down	2.01678	-2.01678	-1.01205
NF-κB Activation by Viruses	1.26	0.115	-1.897	ITGB3	integrin subunit beta 3	Plasma Membrane	transmembrane receptor	2.10739e-06	1.77301e-07	down	1.98681	-1.98681	-0.990453
HIPPO signaling	1.26	0.115	1.633	SMAD2	SMAD family member 2	Nucleus	transcription regulator	1.4095e-06	1.10481e-07	up	1.52286	1.52286	0.606787
HIPPO signaling	1.26	0.115	1.633	TJP2	tight junction protein 2	Plasma Membrane	kinase	1.97025e-08	5.6641e-10	up	1.58858	1.58858	0.667733
HIPPO signaling	1.26	0.115	1.633	YWHAG	tyrosine 3-monooxygenase/tryptophan 5-monooxygenase activation protein gamma	Cytoplasm	other	3.50366e-08	1.1649e-09	down	1.75089	-1.75089	-0.808087
HIPPO signaling	1.26	0.115	1.633	PPP1R7	protein phosphatase 1 regulatory subunit 7	Nucleus	phosphatase	1.91811e-08	5.46051e-10	up	1.51893	1.51893	0.603057
HIPPO signaling	1.26	0.115	1.633	YWHAZ	tyrosine 3-monooxygenase/tryptophan 5-monooxygenase activation protein zeta	Cytoplasm	enzyme	2.82601e-10	2.16809e-12	down	1.5975	-1.5975	-0.67582
HIPPO signaling	1.26	0.115	1.633	SCRIB	scribbled planar cell polarity protein	Cytoplasm	other	1.04228e-07	4.61121e-09	up	1.51043	1.51043	0.594963
HIPPO signaling	1.26	0.115	1.633	SMAD5	SMAD family member 5	Nucleus	transcription regulator	2.78306e-08	8.78668e-10	down	1.68691	-1.68691	-0.754387
HIPPO signaling	1.26	0.115	1.633	PPP2R1B	protein phosphatase 2 scaffold subunit Abeta	Plasma Membrane	phosphatase	1.07505e-10	5.86427e-13	down	3.55737	-3.55737	-1.83081
HIPPO signaling	1.26	0.115	1.633	PPP2R5A	protein phosphatase 2 regulatory subunit B'alpha	Cytoplasm	phosphatase	4.36257e-10	3.81011e-12	up	1.99923	1.99923	0.999443
HIPPO signaling	1.26	0.115	1.633	SKP2	S-phase kinase associated protein 2	Nucleus	enzyme	5.42465e-07	3.47364e-08	down	1.88081	-1.88081	-0.911357
TGF-β Signaling	1.26	0.115	-0.632	SMAD2	SMAD family member 2	Nucleus	transcription regulator	1.4095e-06	1.10481e-07	up	1.52286	1.52286	0.606787
TGF-β Signaling	1.26	0.115	-0.632	RUNX2	runt related transcription factor 2	Nucleus	transcription regulator	2.44957e-06	2.12071e-07	down	1.71705	-1.71705	-0.77993
TGF-β Signaling	1.26	0.115	-0.632	CDC42	cell division cycle 42	Cytoplasm	enzyme	7.68247e-08	3.11153e-09	up	1.53845	1.53845	0.621477
TGF-β Signaling	1.26	0.115	-0.632	MAPK3	mitogen-activated protein kinase 3	Cytoplasm	kinase	4.35448e-07	2.63697e-08	down	1.70674	-1.70674	-0.77124
TGF-β Signaling	1.26	0.115	-0.632	SMAD6	SMAD family member 6	Nucleus	transcription regulator	0.000169527	3.1083e-05	down	1.53174	-1.53174	-0.615173
TGF-β Signaling	1.26	0.115	-0.632	SMURF2	SMAD specific E3 ubiquitin protein ligase 2	Cytoplasm	enzyme	7.88387e-10	8.76498e-12	up	1.82871	1.82871	0.870823
TGF-β Signaling	1.26	0.115	-0.632	SMAD5	SMAD family member 5	Nucleus	transcription regulator	2.78306e-08	8.78668e-10	down	1.68691	-1.68691	-0.754387
TGF-β Signaling	1.26	0.115	-0.632	INHBB	inhibin beta B subunit	Extracellular Space	growth factor	0.000168002	3.07676e-05	down	1.51544	-1.51544	-0.599737
TGF-β Signaling	1.26	0.115	-0.632	ACVR2A	activin A receptor type 2A	Plasma Membrane	kinase	3.43638e-05	4.83717e-06	down	1.60096	-1.60096	-0.678933
TGF-β Signaling	1.26	0.115	-0.632	INHBA	inhibin beta A subunit	Extracellular Space	growth factor	2.45367e-06	2.12503e-07	up	1.56266	1.56266	0.644
CDK5 Signaling	1.25	0.111	0.333	PRKACB	protein kinase cAMP-activated catalytic subunit beta	Cytoplasm	kinase	3.85749e-08	1.31897e-09	down	2.07728	-2.07728	-1.0547
CDK5 Signaling	1.25	0.111	0.333	PRKAR2B	protein kinase cAMP-dependent type II regulatory subunit beta	Cytoplasm	kinase	1.11727e-05	1.29359e-06	up	1.57564	1.57564	0.655937
CDK5 Signaling	1.25	0.111	0.333	PPP1R7	protein phosphatase 1 regulatory subunit 7	Nucleus	phosphatase	1.91811e-08	5.46051e-10	up	1.51893	1.51893	0.603057
CDK5 Signaling	1.25	0.111	0.333	MAPK3	mitogen-activated protein kinase 3	Cytoplasm	kinase	4.35448e-07	2.63697e-08	down	1.70674	-1.70674	-0.77124
CDK5 Signaling	1.25	0.111	0.333	ITGA2	integrin subunit alpha 2	Plasma Membrane	transmembrane receptor	1.38403e-07	6.53158e-09	up	1.86016	1.86016	0.895423
CDK5 Signaling	1.25	0.111	0.333	PRKAR2A	protein kinase cAMP-dependent type II regulatory subunit alpha	Cytoplasm	kinase	1.6572e-09	2.35652e-11	up	1.61798	1.61798	0.694197
CDK5 Signaling	1.25	0.111	0.333	MAPK6	mitogen-activated protein kinase 6	Cytoplasm	kinase	4.52212e-06	4.40282e-07	down	1.51355	-1.51355	-0.59794
CDK5 Signaling	1.25	0.111	0.333	ITGA6	integrin subunit alpha 6	Plasma Membrane	transmembrane receptor	4.16708e-10	3.60446e-12	down	1.9976	-1.9976	-0.99827
CDK5 Signaling	1.25	0.111	0.333	NGF	nerve growth factor	Extracellular Space	growth factor	3.4574e-09	6.13073e-11	down	2.06288	-2.06288	-1.04466
CDK5 Signaling	1.25	0.111	0.333	PPP2R1B	protein phosphatase 2 scaffold subunit Abeta	Plasma Membrane	phosphatase	1.07505e-10	5.86427e-13	down	3.55737	-3.55737	-1.83081
CDK5 Signaling	1.25	0.111	0.333	PPP2R5A	protein phosphatase 2 regulatory subunit B'alpha	Cytoplasm	phosphatase	4.36257e-10	3.81011e-12	up	1.99923	1.99923	0.999443
fMLP Signaling in Neutrophils	1.25	0.106	-1.897	GNG4	G protein subunit gamma 4	Plasma Membrane	enzyme	2.89549e-05	3.96899e-06	down	1.50766	-1.50766	-0.592307
fMLP Signaling in Neutrophils	1.25	0.106	-1.897	ACTR2	ARP2 actin related protein 2 homolog	Plasma Membrane	other	4.47975e-11	1.56137e-13	down	2.38126	-2.38126	-1.25172
fMLP Signaling in Neutrophils	1.25	0.106	-1.897	PIK3C2A	phosphatidylinositol-4-phosphate 3-kinase catalytic subunit type 2 alpha	Cytoplasm	kinase	2.82584e-06	2.52843e-07	down	1.59286	-1.59286	-0.671617
fMLP Signaling in Neutrophils	1.25	0.106	-1.897	NFATC3	nuclear factor of activated T-cells 3	Nucleus	transcription regulator	2.44288e-06	2.1143e-07	down	1.71021	-1.71021	-0.77417
fMLP Signaling in Neutrophils	1.25	0.106	-1.897	FGFR1	fibroblast growth factor receptor 1	Plasma Membrane	kinase	0.000247191	4.8071e-05	up	1.50868	1.50868	0.59329
fMLP Signaling in Neutrophils	1.25	0.106	-1.897	GNB5	G protein subunit beta 5	Plasma Membrane	enzyme	3.71155e-06	3.49654e-07	down	1.5287	-1.5287	-0.612307
fMLP Signaling in Neutrophils	1.25	0.106	-1.897	PIK3R3	phosphoinositide-3-kinase regulatory subunit 3	Cytoplasm	kinase	8.33611e-08	3.4717e-09	down	1.6323	-1.6323	-0.706907
fMLP Signaling in Neutrophils	1.25	0.106	-1.897	GNB4	G protein subunit beta 4	Plasma Membrane	enzyme	2.91359e-06	2.6225e-07	down	1.9306	-1.9306	-0.949047
fMLP Signaling in Neutrophils	1.25	0.106	-1.897	GNAI3	G protein subunit alpha i3	Cytoplasm	enzyme	1.09582e-07	4.92056e-09	down	1.51852	-1.51852	-0.602667
fMLP Signaling in Neutrophils	1.25	0.106	-1.897	CDC42	cell division cycle 42	Cytoplasm	enzyme	7.68247e-08	3.11153e-09	up	1.53845	1.53845	0.621477
fMLP Signaling in Neutrophils	1.25	0.106	-1.897	MAPK3	mitogen-activated protein kinase 3	Cytoplasm	kinase	4.35448e-07	2.63697e-08	down	1.70674	-1.70674	-0.77124
fMLP Signaling in Neutrophils	1.25	0.106	-1.897	PRKCE	protein kinase C epsilon	Cytoplasm	kinase	5.22833e-10	4.84166e-12	down	2.01678	-2.01678	-1.01205
fMLP Signaling in Neutrophils	1.25	0.106	-1.897	NFATC2	nuclear factor of activated T-cells 2	Nucleus	transcription regulator	2.81161e-08	8.90543e-10	down	1.87801	-1.87801	-0.909203
DNA Double-Strand Break Repair by Homologous Recombination	1.24	0.214	NaN	GEN1	GEN1, Holliday junction 5' flap endonuclease	Cytoplasm	enzyme	0.0002968	5.91984e-05	down	1.6782	-1.6782	-0.746913
DNA Double-Strand Break Repair by Homologous Recombination	1.24	0.214	NaN	MRE11	MRE11 homolog, double strand break repair nuclease	Nucleus	enzyme	1.56027e-05	1.92558e-06	down	1.56939	-1.56939	-0.650207
DNA Double-Strand Break Repair by Homologous Recombination	1.24	0.214	NaN	BRCA1	BRCA1, DNA repair associated	Nucleus	transcription regulator	2.40849e-06	2.07963e-07	down	1.52917	-1.52917	-0.612753
DNA Double-Strand Break Repair by Non-Homologous End Joining	1.24	0.214	NaN	WRN	Werner syndrome RecQ like helicase	Nucleus	enzyme	2.66649e-06	2.35568e-07	down	1.5509	-1.5509	-0.633107
DNA Double-Strand Break Repair by Non-Homologous End Joining	1.24	0.214	NaN	MRE11	MRE11 homolog, double strand break repair nuclease	Nucleus	enzyme	1.56027e-05	1.92558e-06	down	1.56939	-1.56939	-0.650207
DNA Double-Strand Break Repair by Non-Homologous End Joining	1.24	0.214	NaN	XRCC4	X-ray repair cross complementing 4	Nucleus	other	2.84039e-06	2.54506e-07	down	1.53413	-1.53413	-0.617423
Isoleucine Degradation I	1.24	0.214	NaN	BCAT1	branched chain amino acid transaminase 1	Cytoplasm	enzyme	9.96008e-10	1.18588e-11	down	1.69074	-1.69074	-0.757657
Isoleucine Degradation I	1.24	0.214	NaN	AUH	AU RNA binding methylglutaconyl-CoA hydratase	Cytoplasm	enzyme	3.16775e-07	1.8036e-08	down	1.60631	-1.60631	-0.683753
Isoleucine Degradation I	1.24	0.214	NaN	DLD	dihydrolipoamide dehydrogenase	Cytoplasm	enzyme	1.4059e-05	1.69823e-06	down	1.51035	-1.51035	-0.59488
CREB Signaling in Neurons	1.24	0.0968	-1.732	POLR2I	RNA polymerase II subunit I	Nucleus	transcription regulator	5.00112e-11	1.85759e-13	up	1.70927	1.70927	0.77338
CREB Signaling in Neurons	1.24	0.0968	-1.732	GNG4	G protein subunit gamma 4	Plasma Membrane	enzyme	2.89549e-05	3.96899e-06	down	1.50766	-1.50766	-0.592307
CREB Signaling in Neurons	1.24	0.0968	-1.732	PRKACB	protein kinase cAMP-activated catalytic subunit beta	Cytoplasm	kinase	3.85749e-08	1.31897e-09	down	2.07728	-2.07728	-1.0547
CREB Signaling in Neurons	1.24	0.0968	-1.732	PIK3C2A	phosphatidylinositol-4-phosphate 3-kinase catalytic subunit type 2 alpha	Cytoplasm	kinase	2.82584e-06	2.52843e-07	down	1.59286	-1.59286	-0.671617
CREB Signaling in Neurons	1.24	0.0968	-1.732	FGFR1	fibroblast growth factor receptor 1	Plasma Membrane	kinase	0.000247191	4.8071e-05	up	1.50868	1.50868	0.59329
CREB Signaling in Neurons	1.24	0.0968	-1.732	GNA11	G protein subunit alpha 11	Plasma Membrane	enzyme	4.84133e-08	1.76622e-09	up	1.59017	1.59017	0.669177
CREB Signaling in Neurons	1.24	0.0968	-1.732	PRKAR2A	protein kinase cAMP-dependent type II regulatory subunit alpha	Cytoplasm	kinase	1.6572e-09	2.35652e-11	up	1.61798	1.61798	0.694197
CREB Signaling in Neurons	1.24	0.0968	-1.732	GNB5	G protein subunit beta 5	Plasma Membrane	enzyme	3.71155e-06	3.49654e-07	down	1.5287	-1.5287	-0.612307
CREB Signaling in Neurons	1.24	0.0968	-1.732	CREB5	cAMP responsive element binding protein 5	Nucleus	transcription regulator	7.24769e-06	7.75162e-07	down	1.82782	-1.82782	-0.870123
CREB Signaling in Neurons	1.24	0.0968	-1.732	PIK3R3	phosphoinositide-3-kinase regulatory subunit 3	Cytoplasm	kinase	8.33611e-08	3.4717e-09	down	1.6323	-1.6323	-0.706907
CREB Signaling in Neurons	1.24	0.0968	-1.732	GNB4	G protein subunit beta 4	Plasma Membrane	enzyme	2.91359e-06	2.6225e-07	down	1.9306	-1.9306	-0.949047
CREB Signaling in Neurons	1.24	0.0968	-1.732	GNAI3	G protein subunit alpha i3	Cytoplasm	enzyme	1.09582e-07	4.92056e-09	down	1.51852	-1.51852	-0.602667
CREB Signaling in Neurons	1.24	0.0968	-1.732	PRKAR2B	protein kinase cAMP-dependent type II regulatory subunit beta	Cytoplasm	kinase	1.11727e-05	1.29359e-06	up	1.57564	1.57564	0.655937
CREB Signaling in Neurons	1.24	0.0968	-1.732	MAPK3	mitogen-activated protein kinase 3	Cytoplasm	kinase	4.35448e-07	2.63697e-08	down	1.70674	-1.70674	-0.77124
CREB Signaling in Neurons	1.24	0.0968	-1.732	PRKCE	protein kinase C epsilon	Cytoplasm	kinase	5.22833e-10	4.84166e-12	down	2.01678	-2.01678	-1.01205
CREB Signaling in Neurons	1.24	0.0968	-1.732	AKT3	AKT serine/threonine kinase 3	Cytoplasm	kinase	6.87797e-06	7.27745e-07	down	1.6577	-1.6577	-0.72918
CREB Signaling in Neurons	1.24	0.0968	-1.732	RPS6KA1	ribosomal protein S6 kinase A1	Cytoplasm	kinase	3.83157e-08	1.30677e-09	down	1.61813	-1.61813	-0.694327
CREB Signaling in Neurons	1.24	0.0968	-1.732	POLR2L	RNA polymerase II subunit L	Nucleus	enzyme	3.57128e-10	2.89831e-12	up	1.50329	1.50329	0.58812
Pyridoxal 5'-phosphate Salvage Pathway	1.23	0.123	NaN	PIM1	Pim-1 proto-oncogene, serine/threonine kinase	Cytoplasm	kinase	1.93218e-08	5.51564e-10	down	2.57313	-2.57313	-1.36352
Pyridoxal 5'-phosphate Salvage Pathway	1.23	0.123	NaN	MAPK3	mitogen-activated protein kinase 3	Cytoplasm	kinase	4.35448e-07	2.63697e-08	down	1.70674	-1.70674	-0.77124
Pyridoxal 5'-phosphate Salvage Pathway	1.23	0.123	NaN	MAPK6	mitogen-activated protein kinase 6	Cytoplasm	kinase	4.52212e-06	4.40282e-07	down	1.51355	-1.51355	-0.59794
Pyridoxal 5'-phosphate Salvage Pathway	1.23	0.123	NaN	CDK6	cyclin dependent kinase 6	Nucleus	kinase	1.75382e-10	1.12439e-12	down	1.96768	-1.96768	-0.976497
Pyridoxal 5'-phosphate Salvage Pathway	1.23	0.123	NaN	PRKAA2	protein kinase AMP-activated catalytic subunit alpha 2	Cytoplasm	kinase	2.10783e-08	6.11859e-10	up	2.56896	2.56896	1.36119
Pyridoxal 5'-phosphate Salvage Pathway	1.23	0.123	NaN	PRKCE	protein kinase C epsilon	Cytoplasm	kinase	5.22833e-10	4.84166e-12	down	2.01678	-2.01678	-1.01205
Pyridoxal 5'-phosphate Salvage Pathway	1.23	0.123	NaN	ACVR2A	activin A receptor type 2A	Plasma Membrane	kinase	3.43638e-05	4.83717e-06	down	1.60096	-1.60096	-0.678933
Pyridoxal 5'-phosphate Salvage Pathway	1.23	0.123	NaN	IRAK1	interleukin 1 receptor associated kinase 1	Plasma Membrane	kinase	8.27246e-10	9.38641e-12	up	1.94638	1.94638	0.960793
VEGF Family Ligand-Receptor Interactions	1.23	0.114	-1	PIK3R3	phosphoinositide-3-kinase regulatory subunit 3	Cytoplasm	kinase	8.33611e-08	3.4717e-09	down	1.6323	-1.6323	-0.706907
VEGF Family Ligand-Receptor Interactions	1.23	0.114	-1	PLA2G4A	phospholipase A2 group IVA	Cytoplasm	enzyme	3.53697e-06	3.30328e-07	up	1.62024	1.62024	0.69621
VEGF Family Ligand-Receptor Interactions	1.23	0.114	-1	PIK3C2A	phosphatidylinositol-4-phosphate 3-kinase catalytic subunit type 2 alpha	Cytoplasm	kinase	2.82584e-06	2.52843e-07	down	1.59286	-1.59286	-0.671617
VEGF Family Ligand-Receptor Interactions	1.23	0.114	-1	MAPK3	mitogen-activated protein kinase 3	Cytoplasm	kinase	4.35448e-07	2.63697e-08	down	1.70674	-1.70674	-0.77124
VEGF Family Ligand-Receptor Interactions	1.23	0.114	-1	FGFR1	fibroblast growth factor receptor 1	Plasma Membrane	kinase	0.000247191	4.8071e-05	up	1.50868	1.50868	0.59329
VEGF Family Ligand-Receptor Interactions	1.23	0.114	-1	VEGFC	vascular endothelial growth factor C	Extracellular Space	growth factor	3.58259e-08	1.19581e-09	down	1.61553	-1.61553	-0.692007
VEGF Family Ligand-Receptor Interactions	1.23	0.114	-1	AKT3	AKT serine/threonine kinase 3	Cytoplasm	kinase	6.87797e-06	7.27745e-07	down	1.6577	-1.6577	-0.72918
VEGF Family Ligand-Receptor Interactions	1.23	0.114	-1	PRKCE	protein kinase C epsilon	Cytoplasm	kinase	5.22833e-10	4.84166e-12	down	2.01678	-2.01678	-1.01205
VEGF Family Ligand-Receptor Interactions	1.23	0.114	-1	PLA2G12A	phospholipase A2 group XIIA	Other	enzyme	9.14457e-06	1.02317e-06	up	1.60747	1.60747	0.68479
VEGF Family Ligand-Receptor Interactions	1.23	0.114	-1	NRP1	neuropilin 1	Plasma Membrane	transmembrane receptor	2.55591e-08	7.86792e-10	down	2.34357	-2.34357	-1.22871
Gαq Signaling	1.23	0.0994	-1.387	GNG4	G protein subunit gamma 4	Plasma Membrane	enzyme	2.89549e-05	3.96899e-06	down	1.50766	-1.50766	-0.592307
Gαq Signaling	1.23	0.0994	-1.387	RGS2	regulator of G protein signaling 2	Nucleus	other	6.66872e-08	2.6212e-09	up	1.5646	1.5646	0.64579
Gαq Signaling	1.23	0.0994	-1.387	NAPEPLD	N-acyl phosphatidylethanolamine phospholipase D	Cytoplasm	enzyme	4.04913e-07	2.41565e-08	down	1.70998	-1.70998	-0.773983
Gαq Signaling	1.23	0.0994	-1.387	PIK3C2A	phosphatidylinositol-4-phosphate 3-kinase catalytic subunit type 2 alpha	Cytoplasm	kinase	2.82584e-06	2.52843e-07	down	1.59286	-1.59286	-0.671617
Gαq Signaling	1.23	0.0994	-1.387	NFATC3	nuclear factor of activated T-cells 3	Nucleus	transcription regulator	2.44288e-06	2.1143e-07	down	1.71021	-1.71021	-0.77417
Gαq Signaling	1.23	0.0994	-1.387	FGFR1	fibroblast growth factor receptor 1	Plasma Membrane	kinase	0.000247191	4.8071e-05	up	1.50868	1.50868	0.59329
Gαq Signaling	1.23	0.0994	-1.387	GNA11	G protein subunit alpha 11	Plasma Membrane	enzyme	4.84133e-08	1.76622e-09	up	1.59017	1.59017	0.669177
Gαq Signaling	1.23	0.0994	-1.387	GNB5	G protein subunit beta 5	Plasma Membrane	enzyme	3.71155e-06	3.49654e-07	down	1.5287	-1.5287	-0.612307
Gαq Signaling	1.23	0.0994	-1.387	PIK3R3	phosphoinositide-3-kinase regulatory subunit 3	Cytoplasm	kinase	8.33611e-08	3.4717e-09	down	1.6323	-1.6323	-0.706907
Gαq Signaling	1.23	0.0994	-1.387	GNB4	G protein subunit beta 4	Plasma Membrane	enzyme	2.91359e-06	2.6225e-07	down	1.9306	-1.9306	-0.949047
Gαq Signaling	1.23	0.0994	-1.387	MAPK3	mitogen-activated protein kinase 3	Cytoplasm	kinase	4.35448e-07	2.63697e-08	down	1.70674	-1.70674	-0.77124
Gαq Signaling	1.23	0.0994	-1.387	PRKCE	protein kinase C epsilon	Cytoplasm	kinase	5.22833e-10	4.84166e-12	down	2.01678	-2.01678	-1.01205
Gαq Signaling	1.23	0.0994	-1.387	AKT3	AKT serine/threonine kinase 3	Cytoplasm	kinase	6.87797e-06	7.27745e-07	down	1.6577	-1.6577	-0.72918
Gαq Signaling	1.23	0.0994	-1.387	NFATC2	nuclear factor of activated T-cells 2	Nucleus	transcription regulator	2.81161e-08	8.90543e-10	down	1.87801	-1.87801	-0.909203
Gαq Signaling	1.23	0.0994	-1.387	GSK3B	glycogen synthase kinase 3 beta	Nucleus	kinase	2.55367e-07	1.38835e-08	up	1.64288	1.64288	0.71623
Gαq Signaling	1.23	0.0994	-1.387	FNBP1	formin binding protein 1	Nucleus	enzyme	1.3572e-06	1.05504e-07	up	1.82302	1.82302	0.866333
D-myo-inositol-5-phosphate Metabolism	1.21	0.0988	NaN	CDC25C	cell division cycle 25C	Nucleus	phosphatase	1.99828e-07	1.02438e-08	down	1.53353	-1.53353	-0.616857
D-myo-inositol-5-phosphate Metabolism	1.21	0.0988	NaN	MTMR9	myotubularin related protein 9	Cytoplasm	phosphatase	1.22625e-08	3.0604e-10	down	2.25266	-2.25266	-1.17163
D-myo-inositol-5-phosphate Metabolism	1.21	0.0988	NaN	PTPN2	protein tyrosine phosphatase, non-receptor type 2	Cytoplasm	phosphatase	1.86738e-07	9.44925e-09	down	1.88027	-1.88027	-0.910937
D-myo-inositol-5-phosphate Metabolism	1.21	0.0988	NaN	PIP4K2B	phosphatidylinositol-5-phosphate 4-kinase type 2 beta	Cytoplasm	kinase	4.19788e-08	1.47519e-09	down	1.58895	-1.58895	-0.668073
D-myo-inositol-5-phosphate Metabolism	1.21	0.0988	NaN	PXYLP1	2-phosphoxylose phosphatase 1	Cytoplasm	phosphatase	1.81024e-09	2.68494e-11	down	1.85496	-1.85496	-0.89139
D-myo-inositol-5-phosphate Metabolism	1.21	0.0988	NaN	PTPRF	protein tyrosine phosphatase, receptor type F	Plasma Membrane	phosphatase	7.40141e-10	7.98532e-12	down	1.71825	-1.71825	-0.780943
D-myo-inositol-5-phosphate Metabolism	1.21	0.0988	NaN	PPP2R5A	protein phosphatase 2 regulatory subunit B'alpha	Cytoplasm	phosphatase	4.36257e-10	3.81011e-12	up	1.99923	1.99923	0.999443
D-myo-inositol-5-phosphate Metabolism	1.21	0.0988	NaN	PTEN	phosphatase and tensin homolog	Cytoplasm	phosphatase	4.30522e-08	1.52354e-09	down	2.05755	-2.05755	-1.04093
D-myo-inositol-5-phosphate Metabolism	1.21	0.0988	NaN	DUSP5	dual specificity phosphatase 5	Nucleus	phosphatase	4.51678e-10	3.9759e-12	down	1.79011	-1.79011	-0.84005
D-myo-inositol-5-phosphate Metabolism	1.21	0.0988	NaN	PTPRJ	protein tyrosine phosphatase, receptor type J	Plasma Membrane	phosphatase	2.36348e-08	7.10764e-10	down	1.70435	-1.70435	-0.769223
D-myo-inositol-5-phosphate Metabolism	1.21	0.0988	NaN	PPP1R7	protein phosphatase 1 regulatory subunit 7	Nucleus	phosphatase	1.91811e-08	5.46051e-10	up	1.51893	1.51893	0.603057
D-myo-inositol-5-phosphate Metabolism	1.21	0.0988	NaN	PPM1H	protein phosphatase, Mg2+/Mn2+ dependent 1H	Nucleus	phosphatase	8.71728e-07	6.16089e-08	up	1.64629	1.64629	0.719217
D-myo-inositol-5-phosphate Metabolism	1.21	0.0988	NaN	PRUNE1	prune exopolyphosphatase 1	Nucleus	enzyme	9.36801e-09	2.16165e-10	down	1.64782	-1.64782	-0.720557
D-myo-inositol-5-phosphate Metabolism	1.21	0.0988	NaN	DUSP12	dual specificity phosphatase 12	Nucleus	phosphatase	4.80782e-09	9.25921e-11	down	1.52957	-1.52957	-0.613127
D-myo-inositol-5-phosphate Metabolism	1.21	0.0988	NaN	PIP4K2C	phosphatidylinositol-5-phosphate 4-kinase type 2 gamma	Cytoplasm	kinase	1.35592e-09	1.82482e-11	down	1.8346	-1.8346	-0.875467
D-myo-inositol-5-phosphate Metabolism	1.21	0.0988	NaN	CDC25A	cell division cycle 25A	Nucleus	phosphatase	2.09251e-08	6.0688e-10	down	1.72289	-1.72289	-0.784827
Nitric Oxide Signaling in the Cardiovascular System	1.2	0.106	-0.905	PRKACB	protein kinase cAMP-activated catalytic subunit beta	Cytoplasm	kinase	3.85749e-08	1.31897e-09	down	2.07728	-2.07728	-1.0547
Nitric Oxide Signaling in the Cardiovascular System	1.2	0.106	-0.905	PIK3R3	phosphoinositide-3-kinase regulatory subunit 3	Cytoplasm	kinase	8.33611e-08	3.4717e-09	down	1.6323	-1.6323	-0.706907
Nitric Oxide Signaling in the Cardiovascular System	1.2	0.106	-0.905	PRKAR2B	protein kinase cAMP-dependent type II regulatory subunit beta	Cytoplasm	kinase	1.11727e-05	1.29359e-06	up	1.57564	1.57564	0.655937
Nitric Oxide Signaling in the Cardiovascular System	1.2	0.106	-0.905	PIK3C2A	phosphatidylinositol-4-phosphate 3-kinase catalytic subunit type 2 alpha	Cytoplasm	kinase	2.82584e-06	2.52843e-07	down	1.59286	-1.59286	-0.671617
Nitric Oxide Signaling in the Cardiovascular System	1.2	0.106	-0.905	MAPK3	mitogen-activated protein kinase 3	Cytoplasm	kinase	4.35448e-07	2.63697e-08	down	1.70674	-1.70674	-0.77124
Nitric Oxide Signaling in the Cardiovascular System	1.2	0.106	-0.905	FGFR1	fibroblast growth factor receptor 1	Plasma Membrane	kinase	0.000247191	4.8071e-05	up	1.50868	1.50868	0.59329
Nitric Oxide Signaling in the Cardiovascular System	1.2	0.106	-0.905	PRKAR2A	protein kinase cAMP-dependent type II regulatory subunit alpha	Cytoplasm	kinase	1.6572e-09	2.35652e-11	up	1.61798	1.61798	0.694197
Nitric Oxide Signaling in the Cardiovascular System	1.2	0.106	-0.905	VEGFC	vascular endothelial growth factor C	Extracellular Space	growth factor	3.58259e-08	1.19581e-09	down	1.61553	-1.61553	-0.692007
Nitric Oxide Signaling in the Cardiovascular System	1.2	0.106	-0.905	HSP90AA1	heat shock protein 90 alpha family class A member 1	Cytoplasm	enzyme	7.40107e-10	7.894e-12	up	1.62731	1.62731	0.70249
Nitric Oxide Signaling in the Cardiovascular System	1.2	0.106	-0.905	SLC7A1	solute carrier family 7 member 1	Plasma Membrane	transporter	3.61986e-10	2.94694e-12	down	1.86997	-1.86997	-0.903013
Nitric Oxide Signaling in the Cardiovascular System	1.2	0.106	-0.905	AKT3	AKT serine/threonine kinase 3	Cytoplasm	kinase	6.87797e-06	7.27745e-07	down	1.6577	-1.6577	-0.72918
Nitric Oxide Signaling in the Cardiovascular System	1.2	0.106	-0.905	PRKCE	protein kinase C epsilon	Cytoplasm	kinase	5.22833e-10	4.84166e-12	down	2.01678	-2.01678	-1.01205
PAK Signaling	1.2	0.109	0	PIK3R3	phosphoinositide-3-kinase regulatory subunit 3	Cytoplasm	kinase	8.33611e-08	3.4717e-09	down	1.6323	-1.6323	-0.706907
PAK Signaling	1.2	0.109	0	CFL2	cofilin 2	Extracellular Space	other	1.08471e-11	2.31805e-14	down	2.63909	-2.63909	-1.40004
PAK Signaling	1.2	0.109	0	PIK3C2A	phosphatidylinositol-4-phosphate 3-kinase catalytic subunit type 2 alpha	Cytoplasm	kinase	2.82584e-06	2.52843e-07	down	1.59286	-1.59286	-0.671617
PAK Signaling	1.2	0.109	0	CDC42	cell division cycle 42	Cytoplasm	enzyme	7.68247e-08	3.11153e-09	up	1.53845	1.53845	0.621477
PAK Signaling	1.2	0.109	0	MAPK3	mitogen-activated protein kinase 3	Cytoplasm	kinase	4.35448e-07	2.63697e-08	down	1.70674	-1.70674	-0.77124
PAK Signaling	1.2	0.109	0	PAK1IP1	PAK1 interacting protein 1	Nucleus	other	3.51409e-09	6.2402e-11	down	1.78701	-1.78701	-0.83755
PAK Signaling	1.2	0.109	0	FGFR1	fibroblast growth factor receptor 1	Plasma Membrane	kinase	0.000247191	4.8071e-05	up	1.50868	1.50868	0.59329
PAK Signaling	1.2	0.109	0	WASL	Wiskott-Aldrich syndrome like	Cytoplasm	other	9.38587e-08	4.01634e-09	up	1.60073	1.60073	0.678733
PAK Signaling	1.2	0.109	0	ITGA2	integrin subunit alpha 2	Plasma Membrane	transmembrane receptor	1.38403e-07	6.53158e-09	up	1.86016	1.86016	0.895423
PAK Signaling	1.2	0.109	0	ITGA5	integrin subunit alpha 5	Plasma Membrane	transmembrane receptor	2.35836e-10	1.66796e-12	down	2.56143	-2.56143	-1.35695
PAK Signaling	1.2	0.109	0	PDGFB	platelet derived growth factor subunit B	Extracellular Space	growth factor	7.58112e-09	1.67989e-10	down	1.56623	-1.56623	-0.647293
[truncated: 1,528 more rows]
