# Supplementary material for: In leukemia, knock-down of the death inducer-obliterator gene would inhibit the proliferation of endothelial cells by inhibiting the expression of CDK6 and CCND1
Source: PeerJ. 2022 Feb 1;10:e12832. doi: 10.7717/peerj.12832 (PMC8815367; doi:10.7717/peerj.12832)
Supplement: Supplemental Information 9 [file peerj-10-12832-s009.xlsx]

## Sheet: Sheet
Symbol	Synonym(s)	Entrez Gene Name	Affymetrix	Expr Fold Change	Location	Family	Drugs	Expr shDIDO/shCtrl in qRT-PCR
ATF3	activating transcription factor 3, AIT3, LRF-1, LRFI, LRG-21	activating transcription factor 3	11719344_a_at	-2.02902	Nucleus	transcription regulator		0.42
BTG2	AA959598, Agl, An, an-1, APRO1, B cell translocation gene 2, anti-proliferative, BTG anti-proliferation factor 2, PC3, TIS21	BTG anti-proliferation factor 2	11715615_at	-1.8118	Nucleus	transcription regulator		0.419
CCND1	AI327039, B-CELL CLL/LYMPHOMA 1, BCL1, cD1, CycD1, CYCLIN D1, Cyl-1, D11S287E, G1/S-Specific Cyclin D1, PRAD1, U21B31	cyclin D1	11721257_at	-2.30478	Nucleus	transcription regulator	arsenic trioxide/tretinoin, arsenic trioxide/daunorubicin/tretinoin, arsenic trioxide/gemtuzumab ozogamicin/tretinoin, arsenic trioxide/idarubicin/tretinoin, arsenic trioxide	0.364
CDK6	5830411I20, AI504062, Crk2, cyclin-dependent kinase 6, FLJ31360, MCPH12, PLSTIRE	cyclin dependent kinase 6	11723244_at	-1.96768	Nucleus	kinase	palbociclib, ribociclib, abemaciclib, letrozole/palbociclib, FLX925, fulvestrant/palbociclib, trilaciclib, G1T38, letrozole/ribociclib, abemaciclib/fulvestrant, alvocidib	0.404
CSF2	colony stimulating factor 2, colony stimulating factor 2 (granulocyte-macrophage), CSF, Csfgm, GMCSF, MGI-IGM, NIF	colony stimulating factor 2	11728876_at	-1.51009	Extracellular Space	cytokine		0.558
DIDO1	6720461J16Rik, BYE1, C20ORF158, D130048F08Rik, DATF-1, death inducer-obliterator 1, dido, DIO-1, dJ885L7.8	death inducer-obliterator 1	11752276_a_at	-2.96029	Nucleus	other		0.297
EED	COGIS, embryonic ectoderm development, ENSMUSG00000039373, HEED, l(7)5Rn, l7Rn5, lusk, WAIT1	embryonic ectoderm development	11761834_at	-1.57088	Nucleus	transcription regulator
EEF1A1	CCS-3, EE1A1, EEF-1, Eef1a2, EEF1A, Eef1a2l1, eEf1alpha, EF-1, EF-1-alpha-1, EF-1-α-1, EF-Tu, EF1A, EF1A-LIKE, Eif1a1, ELONGATION FACTOR 1 alpha, ELONGATION FACTOR 1 α, Elongation factor Tu, eukaryotic elongation factor 1 α 1, eukaryotic translation elongation factor 1 alpha 1, eukaryotic translation elongation factor 1 α 1, GRAF-1EF, HNGC:16303, LENG7, prostate tumour inducing gene-1, PTI1, SI, …	eukaryotic translation elongation factor 1 alpha 1	11749754_a_at	-1.5491	Cytoplasm	translation regulator		0.978
EGFR	9030024J15RIK, AI552599, C-ERBB, EGF receptor, EGF-TK, EGFR1, EGFR vIII, epidermal growth factor receptor, ERBB1, ERBB, Errb1, Errp, HER1, HER-1 (EGFR), MENA, NISBD2, PIG61, Wa5, wa-2	epidermal growth factor receptor	11725102_at	-1.65723	Plasma Membrane	kinase	cetuximab, AEE 788, panitumumab, BMS-599626, varlitinib, tesevatinib, BMS-690514, bevacizumab/erlotinib, afatinib, nimotuzumab, necitumumab, BIBX 1382BS, icotinib, MP 412, sapitinib, cetuximab/irinotecan, lapatinib/pazopanib, irinotecan/panitumumab, erlotinib/vismodegib, erlotinib/gemcitabine, JNJ-26483327, lapatinib/letrozole, capecitabine/lapatinib, bevacizumab/panitumumab, bevacizumab/cetuxima…	0.56
EIF4E	AUTS19, CAP-binding, CBP, EG668879, EIF4E1, Eif4e-ps, EIF4EL1, EIF4F, eukaryotic translation initiation factor 4E, If4e	eukaryotic translation initiation factor 4E	11758512_s_at	-2.9448	Cytoplasm	translation regulator		0.428
EPHA2	ARCC2, AW545284, CTPA, CTPP1, CTRCT6, ECK, EPH receptor A2, Epha2 predicted, Myk2, Sek-2	EPH receptor A2	11717619_at	-1.5003	Plasma Membrane	kinase	dasatinib, MEDI-547, regorafenib, ephA2-targeting DOPC-encapsulated siRNA, dasatinib/dexamethasone	0.661
FOXM1	AA408308, AW554517, BB238854, D1Mgi56, Fkh16, FKHL16, FOCM1, forkhead box M1, FOXM1B, HFH-11, HFH-11B, HNF-3, INS-1, MPHOSPH2, MPM2, MPP-2, PIG29, TRIDENT, WIN	forkhead box M1	11725442_a_at	-1.53348	Nucleus	transcription regulator		0.657
FOXO3	1110048B16RIK, 2010203A17RIK, AF6q21, C76856, Fkhr2, FKHRL1, FKHRL1P2, forkhead box O3, FOXO2, FOXO3A	forkhead box O3	11718891_s_at	-1.57783	Nucleus	transcription regulator		0.58
HMGB1	Ac2-008, high mobility group box 1, HMG3, HMG-1, p30, SBP-1	high mobility group box 1	11739026_x_at	-1.80664	Nucleus	transcription regulator		0.856
JAG1	ABE2, AGS1, AGS, AHD, AWS, CD339, Gsfabe2, HJ1, Htu, Jagged1, JAGL1, Ozz, Ser-1	jagged 1	11720825_s_at	-1.86525	Extracellular Space	growth factor		0.575
MET	AI838057, AUTS9, c-Met, DFNB97, HGF, HGF Binding, HGFR, LOC360378, met proto-oncogene, MET proto-oncogene, receptor tyrosine kinase, MetR, PAR4, RCCP2	MET proto-oncogene, receptor tyrosine kinase	11754144_a_at	-1.5292	Plasma Membrane	kinase	crizotinib, tivantinib, cabozantinib, amuvatinib, AMG 208, PF-4217903, foretinib, golvatinib, SGX523, BMS 777607, MK2461, capmatinib, JNJ-38877605, onartuzumab, MGCD-265, cabozantinib/erlotinib, tepotinib, AMG 337, LY2875358, ARGX-111, SAR125844, volitinib, LY3164530, altiratinib, MGCD516, merestinib, EMD 1204831, MK8033, bozitinib, SAIT301, HS-10241, c-MET inhibitor	0.673
MKI67	antigen identified by monoclonal antibody Ki 67, D630048A14Rik, Ki-67, KIA, marker of proliferation Ki-67, MIB-1, MIB-, MIKI67A, MKI67A, PPP1R105	marker of proliferation Ki-67	11721144_a_at	-1.97998	Nucleus	other		0.74
NGF	2.5S NGF, Beta-NGF, HSAN5, nerve growth factor, Nerve growth factor, β, Ngf beta, Ngf β, NGFB, β-nerve growth factor, β-NGF	nerve growth factor	11729937_at	-2.06288	Extracellular Space	growth factor		0.396
NR4A2	HZF-3, NOT, nuclear receptor subfamily 4 group A member 2, nuclear receptor subfamily 4, group A, member 2, NURR1, Nurr2, RNR-1, TINOR, TINUR	nuclear receptor subfamily 4 group A member 2	11725632_at	-1.50483	Nucleus	ligand-dependent nuclear receptor		0.477
NRG1	6030402G23RIK, ARIA, D230005F13Rik, GGF, GGFII, GP30, Heregulin, HGL, HRG1, HRG, Hrg α, HRGA, HRGalpha, MST131, MSTP131, NAF, Ndf44, NDF, Neuregulin 1, Nrg alpha, Nrg alpha 2c, Nrg beta, Nrg α, Nrg α 2c, Nrg β, Nrg1 alpha 2c, Nrg1 isoform 7, NRG1 SECRETED, Nrg1 α 2c, NRG1-IT2, Nrg1a 44 kda isoform, NRG1B1, SMDF	neuregulin 1	11727215_a_at	-1.97673	Plasma Membrane	growth factor		0.67
PIM1	PIM, Pim-1 proto-oncogene, serine/threonine kinase, proviral integration site 1	Pim-1 proto-oncogene, serine/threonine kinase	11717256_at	-2.57313	Cytoplasm	kinase	SGI 1776, AZD-1208, LGH447	0.308
PRKCE	5830406C15RIK, nPKC-epsilon, nPKC-ε, PKC ε, PKC[e], PKCE, PKCepsilon, protein kinase C epsilon, protein kinase C ε, protein kinase C, epsilon, protein kinase C, ε, R75156	protein kinase C epsilon	11736257_at	-2.01678	Cytoplasm	kinase	protein kinase C-epsilon activator, ingenol mebutate	0.338
PTGS2	Cox, COX-2, CYCLO-OXYGENASE 2, GRIPGHS, hCox-2, INDUCIBLE CYCLOOXYGENASE, MTCO2, PES-2, PGG/HS, PGH synthase 2, PGHS-2, Pgi2 synthase, Pgs2, Pgsi, PHS II, PHS-2, Prostaglandin endoperoxide synthase 2, TIS10	prostaglandin-endoperoxide synthase 2	11724037_at	-1.80716	Cytoplasm	enzyme	acetaminophen/pentazocine, acetaminophen/clemastine/pseudoephedrine, aspirin/butalbital/caffeine, acetaminophen/caffeine/dihydrocodeine, aspirin/hydrocodone, aspirin/oxycodone, acetaminophen/aspirin/caffeine, aspirin/pravastatin, acetaminophen/dexbrompheniramine/pseudoephedrine, aspirin/meprobamate, aspirin/caffeine/propoxyphene, aspirin/butalbital/caffeine/codeine, aspirin/caffeine/dihydrocodein…	0.396
RPS6KA1	HU-1, MAPKAP kinase 1, MAPKAP Kinase 1 Alpha, MAPKAP Kinase 1 α, MAPKAPK1A, p90-RSK 1, p90Rsk, p90S6K, ribosomal protein S6 kinase A1, RIBOSOMAL protein S6 KINASE A, ribosomal protein S6 kinase polypeptide 1, RSK1, RSK, S6K-alpha-1, S6K-α-1	ribosomal protein S6 kinase A1	11741035_a_at	-1.61813	Cytoplasm	kinase		0.573
RUNX2	AML3, Cbf, CBF-alpha 1, CBF-α 1, CBFA1, CCD1, CCD, CLCD, LS3, OSF-2, PEA2-alpha A, PEA2-α A, PEA2aA, Pebp2 α A, PEBP2A1, PEBP2A, PEBP2aA, Pebpa2a, runt-related transcription factor 2, RUNX2 MRIPV, Runx2-ii, RUNX2C	runt related transcription factor 2	11725180_a_at	-1.71705	Nucleus	transcription regulator		0.486
SKP2	4930500A04Rik, cyclin A-associated kinase, F-box protein Skp2, FBL1, FBXL1, FLB1, FWD1, p45, p45Skp2, RGD1562456, S-PHASE KINASE-ASSOCIATED protein 2, S-phase kinase-associated protein 2 (p45)	S-phase kinase associated protein 2	11760241_a_at	-1.88081	Nucleus	enzyme		0.563
SRPK2	AW226533, AW492537, AW547358, mSRPK2, serine/arginine-rich protein specific kinase 2, SFRSK2, Srpk2 predicted, SRSF protein kinase 2, WBP6	SRSF protein kinase 2	11721820_a_at	-2.82792	Nucleus	kinase		0.371
SRSF1	1110054N12Rik, 5730507C05RIK, 6330415C05Rik, AI482334, ASF, ASF/SF2, AW491331, FLJ44342, LOC688114, serine and arginine rich splicing factor 1, serine/arginine-rich splicing factor 1, SF2, SF2/ASF, SF2p33, SFRS1, SRp30a	serine and arginine rich splicing factor 1	11758600_s_at	-1.52581	Nucleus	other
TLR2	CD282, Ly105, TIL4, toll-like receptor 2	toll like receptor 2	11754833_a_at	-1.89028	Plasma Membrane	transmembrane receptor	OM 174 lipid	0.53
VEGFC	AW228853, Flt4 ligand, Flt4-L, LMPH1D, vascular endothelial growth factor C, VRP	vascular endothelial growth factor C	11720163_at	-1.61553	Extracellular Space	growth factor		0.563
WNT5A	8030457G12Rik, hWNT5A, LOC102724616, wingless-type MMTV integration site family, member 5A, Wnt family member 5A	Wnt family member 5A	11727186_a_at	-1.68529	Extracellular Space	cytokine		0.425
WWP2	1300010O06Rik, AA690238, AIP2, AW554328, WW domain containing E3 ubiquitin protein ligase 2, WWp2-like	WW domain containing E3 ubiquitin protein ligase 2	11718924_a_at	1.60245	Cytoplasm	enzyme
YWHAZ	14-3-3 delta, 14-3-3 ZETA/delta, 14-3-3 δ, 14-3-3 ζ/δ, 14-3-3-zeta, 14-3-3-ζ, 14-3-3z, 1110013I11RIK, AI596267, AL022924, AU020854, HEL4, HEL-S-3, HEL-S-93, KCIP-1, Protein kinase c inhibitor 1 beta/alpha, Protein kinase c inhibitor 1 β/α, Protein kinase C inhibitor protein 1 zeta/delta, Protein kinase C inhibitor protein 1 ζ/δ, Tyr mono, Tyrosine 3-Monooxygenase ζ Polypeptide, tyrosine 3-monooxy…	tyrosine 3-monooxygenase/tryptophan 5-monooxygenase activation protein zeta	11756181_x_at	-1.5975	Cytoplasm	enzyme		0.586
