# Supplementary material for: In leukemia, knock-down of the death inducer-obliterator gene would inhibit the proliferation of endothelial cells by inhibiting the expression of CDK6 and CCND1
Source: PeerJ. 2022 Feb 1;10:e12832. doi: 10.7717/peerj.12832 (PMC8815367; doi:10.7717/peerj.12832)
Supplement: Supplemental Information 10 [file peerj-10-12832-s010.xlsx]

## Sheet: RT-PCR 验证
Relative mRNA level (Gene / GAPDH)
	Average (2-ΔΔCt)		STDEV		P value
Sample	shCtrl	shDIDO1	shCtrl	shDIDO1
NRG1	1.00169	0.670037	0.0721712	0.0463323	0.00258487
MKI67	1.00105	0.740431	0.0564397	0.0845203	0.0113202
PRKCE	1.00123	0.337864	0.0614575	0.0332967	8.01874e-05
ATF3	1.00718	0.419793	0.151064	0.0520839	0.00312011
NGF	1.00603	0.396094	0.132522	0.0355499	0.00153097
CCND1	1.00255	0.364139	0.0868738	0.0503595	0.000386539
PIM1	1.00436	0.308452	0.1145	0.024969	0.000503956
SRPK2	1.00278	0.371222	0.0919812	0.031932	0.000357525
EIF4E	1.00231	0.427805	0.0831058	0.0431668	0.000444137
DIDO1	1.0009	0.29705	0.0521438	0.0309907	3.61744e-05
EGFR	1.0062	0.560023	0.133044	0.0475278	0.00543405
WNT5A	1.00272	0.424919	0.0906624	0.0267125	0.000450215
RUNX2	1.00325	0.486377	0.097261	0.00849838	0.0111355
HMGB1	1.00269	0.856349	0.088785	0.0659412	0.0836771
PTGS2	1.00483	0.396447	0.122773	0.0410014	0.00123872
BTG2	1.0013	0.418891	0.0619348	0.0216687	0.00010444
JAG1	1.002	0.574802	0.0764462	0.0546166	0.0014051
SKP2	1.0004	0.562742	0.034666	0.067975	0.000576473
TLR2	1.00175	0.530421	0.0733372	0.0335137	0.000535673
CDK6	1.00152	0.404302	0.0681512	0.0339153	0.000169798
EPHA2	1.00078	0.660811	0.0485441	0.0457764	0.00090981
NR4A2	1.00276	0.476927	0.0897876	0.0297713	0.000650684
CSF2	1.0002	0.558153	0.0243037	0.0583149	0.000265959
MET	1.00292	0.672849	0.0936048	0.0402248	0.00495553
FOXM1	1.00201	0.657283	0.0769804	0.0629577	0.00387305
EEF1A1	1.00194	0.978084	0.0761796	0.124651	0.791331
FOXO3	1.00179	0.580037	0.0729237	0.0534934	0.00127644
YWHAZ	1.01142	0.58609	0.190485	0.042907	0.0195546
VEGFC	1.0057	0.563221	0.128943	0.0571801	0.00556751
RPS6KA1	1.01047	0.573193	0.175928	0.0498536	0.0143532
