# Supplementary material for: In leukemia, knock-down of the death inducer-obliterator gene would inhibit the proliferation of endothelial cells by inhibiting the expression of CDK6 and CCND1
Source: PeerJ. 2022 Feb 1;10:e12832. doi: 10.7717/peerj.12832 (PMC8815367; doi:10.7717/peerj.12832)
Supplement: Supplemental Information 13 [file peerj-10-12832-s013.xlsx]

## Sheet: Figure1A 
The original data of Figure 1A
CURVES
三、data analysis（2-∆∆Ct）
	Group	Data analysis								Dev
		GAPDH	DIDO1	∆Ct	-∆∆Ct	2-∆∆Ct	expression abundance	STDEV.	p value	GAPDH	DIDO1	knock
	shCtrl	12.49	23.08	10.59	0.09	1.06437	1.00186	0.0739753		0.07	0.14
		12.44	23.09	10.65	0.03	1.02101
		12.42	23.22	10.8	-0.12	0.920188
	shDIDO1	13.23	27.95	14.72	-4.04	0.0607909	0.0485269	0.010625	0.001671	0.28	0.33	0.951473
		13.03	28.28	15.25	-4.57	0.042101
		12.95	28.18	15.23	-4.55	0.0426888
Melt curve
RT 763	GAPDH
GAPDH溶解曲线图
RT1639	DIDO1
GENE溶解曲线图

## Sheet: Figure1D
The original data of Figure 1D
cell count
	shCtrl			AVERAGE	STDEV			shDIDO1			AVERAGE	STDEV
day1	954	998	954	968	25		day1	615	608	633	618	12
day2	1635	1658	1611	1634	23		day2	785	845	856	828	38
day3	3982	4144	3972	4032	96		day3	1740	1894	1822	1818	77
day4	7632	7918	7431	7660	244		day4	2739	2833	2735	2769	55
day5	11639	11607	10752	11332	503		day5	4003	3739	3609	3783	200
change fold/1st day
	shCtrl			AVERAGE	STDEV			shDIDO1			AVERAGE	STDEV
day1	1	1	1	1	0		day1	1	1	1	1	0
day2	1.71	1.66	1.69	1.69	0.03		day2	1.28	1.39	1.35	1.34	0.06
day3	4.17	4.15	4.16	4.16	0.01		day3	2.83	3.12	2.88	2.94	0.15
day4	8	7.93	7.79	7.91	0.11		day4	4.45	4.66	4.32	4.48	0.17
day5	12.2	11.63	11.27	11.7	0.47		day5	6.51	6.15	5.7	6.12	0.4
day 4 fold T-Test
compare				p value
shCtrl vs shDIDO1				7.98226e-06
day 5 fold T-Test
compare				p value
shCtrl vs shDIDO1				9.89834e-05
																	shRNA慢病毒感染HUV-EC-C [HUVEC]细胞，3天后，shDIDO1组与对照组（shCtrl）细胞数量的变化倍数随时间变化的对比

## Sheet: Figure 1E
The original data of Figure 1E
	Time(day)	shCtrl					shDIDO1
OD490	1	0.178	0.177	0.183	0.178	0.183	0.162	0.166	0.162	0.161	0.164
	2	0.365	0.363	0.37	0.352	0.359	0.216	0.225	0.208	0.221	0.211
	3	0.68	0.671	0.675	0.67	0.679	0.27	0.27	0.273	0.276	0.267
	4	1.109	1.103	1.096	1.094	1.11	0.363	0.371	0.363	0.361	0.365
	5	1.566	1.567	1.57	1.584	1.573	0.375	0.375	0.372	0.384	0.385
	Time(day)	shCtrl					shDIDO1
OD490/fold	1	0.989	0.983	1.02	0.993	1.016	0.991	1.021	0.997	0.984	1.008
	2	2.031	2.018	2.057	1.958	1.995	1.327	1.378	1.279	1.353	1.296
	3	3.781	3.733	3.755	3.73	3.78	1.657	1.655	1.672	1.696	1.639
	4	6.167	6.137	6.098	6.088	6.174	2.225	2.274	2.226	2.217	2.238
	5	8.711	8.718	8.738	8.813	8.752	2.301	2.297	2.279	2.358	2.36
table1	time(day)	shCtrl	shDIDO1
AVERAGE	1	0.18	0.163
	2	0.362	0.216
	3	0.675	0.271
	4	1.102	0.365
	5	1.572	0.378
STDEV	1	0.003	0.0023
	2	0.0068	0.0066
	3	0.0044	0.0035
	4	0.0071	0.0037
	5	0.0073	0.0061
table2	time(day)	shCtrl	shDIDO1
AVERAGE	1	1	1
	2	2.012	1.327
	3	3.756	1.664
	4	6.133	2.236
	5	8.746	2.319
STDEV	1	0.0168	0.0144
	2	0.0377	0.0406
	3	0.0245	0.0215
	4	0.0394	0.0224
	5	0.0407	0.0372
day4 MTT T-Test ：
compare				p value
shCtrl vs shDIDO1				5.98311e-16
day5 MTT T-Test ：
compare				p value
shCtrl vs shDIDO1				5.24865e-17

## Sheet: Figure 1F
The original data of Figure 1F
Total Tube Area
	Rep 1	Rep 2	Rep3	AVEREGE	STDEV
shCtrl	0.67192	0.667287	0.672237	0.670481	0.00277076
shDIDO1	0.529072	0.514337	0.584272	0.54256	0.036867
T-Test (P value)	shCtrl vs shDIDO1			0.0260299

## Sheet: Figure1G
The original data of Figure 1G
	M1	M	ALL
shCtrl	2.56	97.44	100
	2.42	97.58	100
	2.51	97.49	100
shDIDO1	12.66	87.34	100
	13.14	86.86	100
	13.34	86.66	100
	Apoptosis (%)
shCtrl	2.56
	2.42
	2.51
shDIDO1	12.66
	13.14
	13.34
	AVERAGE	STDEV
shCtrl	2.5	0.0713
shDIDO1	13.05	0.3478
T-test Analysis		P-value
shCtrl vs shDIDO1		8.52318e-07

## Sheet: Figure 1H
The original data of Figure 1H
Caspase3/7
	group	Luminescence
	Blank	3794
		3769
		3847
	shCtrl	41650
		41398
		41740
	shDIDO1	80641
		80171
		80257
Caspase3/7
	group	Luminescence
	shCtrl	37846.7
		37594.7
		37936.7
	shDIDO1	76837.7
		76367.7
		76453.7
	group	Average	STDEV.
	shCtrl	37792.7	177.279
	shDIDO1	76553	250.251
Caspase3/7 T-Test ：
comapre				p value
shCtrl vs shDIDO1				2.61244e-09
备注 1.TTest分析简要说明： t 检验是用t分布理论来推论差异发生的概率，从而比较两个平均数的差异是否显著。 本报告t检验分析的具体做法为： - 将需要进行分析的两组先进行F检验（即方差齐性检验）， - 如果F检验值>0.05，则按等方差双样本检验得到TTest值，如果F检验值<0.05，则按异方差双样本检验得到TTest值。 - TTest值<0.05，表明两个实验组统计学有显著性差异，TTest值>0.05，表明两个实验组统计学无显著性差异。 2.数据判断标准（仅供参考）： - 实验组与对照组相比，P>0.05，判断为阴性结果； - 实验组与对照组相比，P<0.05，且测定值差异>50%，判断为强阳性结果； - 实验组与对照组相比，P<0.05，且测定值差异为20%~50%，判断为阳性结果； - 实验组与对照组相比，P<0.05，但测定值差异<20%，不建议判断为阳性结果。

## Sheet: Figure2E
The original data of Figure 2E
CDK6		GROUP	DATA							Dev
			GAPDH	CDK6	∆Ct	-∆∆Ct	2-∆∆Ct	Relative expression	knock	GAPDH	CDK6
		NC	12.6	21.57	8.97	0.106667	1.07674	1.00152		0.28	0.1
			12.48	21.58	9.1	-0.0233333	0.983957
			12.32	21.48	9.16	-0.0833333	0.943874
		KD	12.33	22.64	10.31	-1.23333	0.425334	0.404302	0.595698	0.23	0.04
			12.1	22.63	10.53	-1.45333	0.365177
			12.28	22.6	10.32	-1.24333	0.422396
GAPDH
CDK6
CCND1		GROUP	DATA							Dev
			GAPDH	CCND1	∆Ct	-∆∆Ct	2-∆∆Ct	Relative expression	knock	GAPDH	CCND1
		NC	12.6	17.31	4.71	0.0233333	1.0163	1.00255		0.28	0.21
			12.48	17.1	4.62	0.113333	1.08172
			12.32	17.19	4.87	-0.136667	0.909618
		KD	12.33	18.33	6	-1.26667	0.415619	0.364139	0.635861	0.23	0.17
			12.1	18.5	6.4	-1.66667	0.31498
			12.28	18.48	6.2	-1.46667	0.361817
GAPDH
CCND1
