# Supplementary material for: In leukemia, knock-down of the death inducer-obliterator gene would inhibit the proliferation of endothelial cells by inhibiting the expression of CDK6 and CCND1
Source: PeerJ. 2022 Feb 1;10:e12832. doi: 10.7717/peerj.12832 (PMC8815367; doi:10.7717/peerj.12832)
Supplement: Supplemental Information 15 [file peerj-10-12832-s015.xlsx]

## Sheet: 1-10
一、扩增曲线
1组
2组
3组
4组
5组
6组
7组
8组
9组
10组
二、原始数据
1组
	Include	Color	Pos	Name	Cp	Concentration	Standard	Status		Include	Color	Pos	Name	Tm1	Tm2	Status
	TRUE	255	A1	1	12.6		0			TRUE	255	A1	1	85.49
	TRUE	255	A2	1	12.48		0			TRUE	255	A2	1	85.47
	TRUE	255	A3	1	12.32		0			TRUE	255	A3	1	85.45
	TRUE	255	B1	2	12.33		0			TRUE	255	B1	2	85.46
	TRUE	255	B2	2	12.1		0			TRUE	255	B2	2	85.44
	TRUE	255	B3	2	12.28		0			TRUE	255	B3	2	85.43
	TRUE	255	C1	3	19.89		0			TRUE	255	C1	3	84.38
	TRUE	255	C2	3	19.84		0			TRUE	255	C2	3	84.41
	TRUE	255	C3	3	19.75		0			TRUE	255	C3	3	84.36
	TRUE	255	D1	4	20.29		0			TRUE	255	D1	4	84.42
	TRUE	255	D2	4	20.16		0			TRUE	255	D2	4	84.37
	TRUE	255	D3	4	20.14		0			TRUE	255	D3	4	84.34
2组
	Include	Color	Pos	Name	Cp	Concentration	Standard	Status		Include	Color	Pos	Name	Tm1	Tm2	Status
	TRUE	255	A1	1	12.6		0			TRUE	255	A1	1	85.49
	TRUE	255	A2	1	12.48		0			TRUE	255	A2	1	85.47
	TRUE	255	A3	1	12.32		0			TRUE	255	A3	1	85.45
	TRUE	255	B1	2	12.33		0			TRUE	255	B1	2	85.46
	TRUE	255	B2	2	12.1		0			TRUE	255	B2	2	85.44
	TRUE	255	B3	2	12.28		0			TRUE	255	B3	2	85.43
	TRUE	255	E1	5	24.63		0			TRUE	255	E1	5	86.28
	TRUE	255	E2	5	24.46		0			TRUE	255	E2	5	86.22
	TRUE	255	E3	5	24.55		0			TRUE	255	E3	5	86.18
	TRUE	255	F1	6	25.51		0			TRUE	255	F1	6	86.25
	TRUE	255	F2	6	25.32		0			TRUE	255	F2	6	86.21
	TRUE	255	F3	6	25.33		0			TRUE	255	F3	6	86.17
3组
	Include	Color	Pos	Name	Cp	Concentration	Standard	Status		Include	Color	Pos	Name	Tm1	Tm2	Status
	TRUE	255	A1	1	12.6		0			TRUE	255	A1	1	85.49
	TRUE	255	A2	1	12.48		0			TRUE	255	A2	1	85.47
	TRUE	255	A3	1	12.32		0			TRUE	255	A3	1	85.45
	TRUE	255	B1	2	12.33		0			TRUE	255	B1	2	85.46
	TRUE	255	B2	2	12.1		0			TRUE	255	B2	2	85.44
	TRUE	255	B3	2	12.28		0			TRUE	255	B3	2	85.43
	TRUE	255	G1	7	19.7		0			TRUE	255	G1	7	80.4
	TRUE	255	G2	7	19.55		0			TRUE	255	G2	7	80.42
	TRUE	255	G3	7	19.46		0			TRUE	255	G3	7	80.34
	TRUE	255	H1	8	20.24		0			TRUE	255	H1	8	80.38
	TRUE	255	H2	8	20.22		0			TRUE	255	H2	8	80.41
	TRUE	255	H3	8	20.1		0			TRUE	255	H3	8	80.38
4组
	Include	Color	Pos	Name	Cp	Concentration	Standard	Status		Include	Color	Pos	Name	Tm1	Tm2	Status
	TRUE	255	A1	1	12.6		0			TRUE	255	A1	1	85.49
	TRUE	255	A2	1	12.48		0			TRUE	255	A2	1	85.47
	TRUE	255	A3	1	12.32		0			TRUE	255	A3	1	85.45
	TRUE	255	B1	2	12.33		0			TRUE	255	B1	2	85.46
	TRUE	255	B2	2	12.1		0			TRUE	255	B2	2	85.44
	TRUE	255	B3	2	12.28		0			TRUE	255	B3	2	85.43
	TRUE	255	I1	9	19.15		0			TRUE	255	I1	9	82.34
	TRUE	255	I2	9	18.9		0			TRUE	255	I2	9	82.32
	TRUE	255	I3	9	19.01		0			TRUE	255	I3	9	82.31
	TRUE	255	J1	10	19.49		0			TRUE	255	J1	10	82.32
	TRUE	255	J2	10	19.29		0			TRUE	255	J2	10	82.31
	TRUE	255	J3	10	19.31		0			TRUE	255	J3	10	82.28
5组
	Include	Color	Pos	Name	Cp	Concentration	Standard	Status		Include	Color	Pos	Name	Tm1	Tm2	Status
	TRUE	255	A1	1	12.6		0			TRUE	255	A1	1	85.49
	TRUE	255	A2	1	12.48		0			TRUE	255	A2	1	85.47
	TRUE	255	A3	1	12.32		0			TRUE	255	A3	1	85.45
	TRUE	255	B1	2	12.33		0			TRUE	255	B1	2	85.46
	TRUE	255	B2	2	12.1		0			TRUE	255	B2	2	85.44
	TRUE	255	B3	2	12.28		0			TRUE	255	B3	2	85.43
	TRUE	255	K1	11	18.92		0			TRUE	255	K1	11	85.58
	TRUE	255	K2	11	18.87		0			TRUE	255	K2	11	85.61
	TRUE	255	K3	11	18.86		0			TRUE	255	K3	11	85.57
	TRUE	255	L1	12	19.29		0			TRUE	255	L1	12	85.59
	TRUE	255	L2	12	19.29		0			TRUE	255	L2	12	85.59
	TRUE	255	L3	12	19.21		0			TRUE	255	L3	12	85.59
6组
	Include	Color	Pos	Name	Cp	Concentration	Standard	Status		Include	Color	Pos	Name	Tm1	Tm2	Status
	TRUE	255	A1	1	12.6		0			TRUE	255	A1	1	85.49
	TRUE	255	A2	1	12.48		0			TRUE	255	A2	1	85.47
	TRUE	255	A3	1	12.32		0			TRUE	255	A3	1	85.45
	TRUE	255	B1	2	12.33		0			TRUE	255	B1	2	85.46
	TRUE	255	B2	2	12.1		0			TRUE	255	B2	2	85.44
	TRUE	255	B3	2	12.28		0			TRUE	255	B3	2	85.43
	TRUE	255	M1	13	12.77		0			TRUE	255	M1	13	81.03
	TRUE	255	M2	13	12.55		0			TRUE	255	M2	13	81.01
	TRUE	255	M3	13	12.61		0			TRUE	255	M3	13	80.96
	TRUE	255	N1	14	12.51		0			TRUE	255	N1	14	81.02
	TRUE	255	N2	14	12.52		0			TRUE	255	N2	14	81.01
	TRUE	255	N3	14	12.33		0			TRUE	255	N3	14	80.98
7组
	Include	Color	Pos	Name	Cp	Concentration	Standard	Status		Include	Color	Pos	Name	Tm1	Tm2	Status
	TRUE	255	A1	1	12.6		0			TRUE	255	A1	1	85.49
	TRUE	255	A2	1	12.48		0			TRUE	255	A2	1	85.47
	TRUE	255	A3	1	12.32		0			TRUE	255	A3	1	85.45
	TRUE	255	B1	2	12.33		0			TRUE	255	B1	2	85.46
	TRUE	255	B2	2	12.1		0			TRUE	255	B2	2	85.44
	TRUE	255	B3	2	12.28		0			TRUE	255	B3	2	85.43
	TRUE	255	O1	15	20.3		0			TRUE	255	O1	15	82.89
	TRUE	255	O2	15	20.1		0			TRUE	255	O2	15	82.93
	TRUE	255	O3	15	20.15		0			TRUE	255	O3	15	82.87
	TRUE	255	P1	16	20.79		0			TRUE	255	P1	16	82.86
	TRUE	255	P2	16	20.76		0			TRUE	255	P2	16	82.85
	TRUE	255	P3	16	20.68		0			TRUE	255	P3	16	82.85
8组
	Include	Color	Pos	Name	Cp	Concentration	Standard	Status		Include	Color	Pos	Name	Tm1	Tm2	Status
	TRUE	255	A1	1	12.6		0			TRUE	255	A1	1	85.49
	TRUE	255	A2	1	12.48		0			TRUE	255	A2	1	85.47
	TRUE	255	A3	1	12.32		0			TRUE	255	A3	1	85.45
	TRUE	255	B1	2	12.33		0			TRUE	255	B1	2	85.46
	TRUE	255	B2	2	12.1		0			TRUE	255	B2	2	85.44
	TRUE	255	B3	2	12.28		0			TRUE	255	B3	2	85.43
	TRUE	255	A4	17	15.94		0			TRUE	255	A4	17	81.62
	TRUE	255	A5	17	16.19		0			TRUE	255	A5	17	81.63
	TRUE	255	A6	17	16.17		0			TRUE	255	A6	17	81.6
	TRUE	255	B4	18	16.62		0			TRUE	255	B4	18	81.52
	TRUE	255	B5	18	16.59		0			TRUE	255	B5	18	81.51
	TRUE	255	B6	18	16.72		0			TRUE	255	B6	18	81.51
9组
	Include	Color	Pos	Name	Cp	Concentration	Standard	Status		Include	Color	Pos	Name	Tm1	Tm2	Status
	TRUE	255	A1	1	12.6		0			TRUE	255	A1	1	85.49
	TRUE	255	A2	1	12.48		0			TRUE	255	A2	1	85.47
	TRUE	255	A3	1	12.32		0			TRUE	255	A3	1	85.45
	TRUE	255	B1	2	12.33		0			TRUE	255	B1	2	85.46
	TRUE	255	B2	2	12.1		0			TRUE	255	B2	2	85.44
	TRUE	255	B3	2	12.28		0			TRUE	255	B3	2	85.43
	TRUE	255	C4	19	20.89		0			TRUE	255	C4	19	81.12
	TRUE	255	C5	19	20.88		0			TRUE	255	C5	19	81.1
	TRUE	255	C6	19	20.98		0			TRUE	255	C6	19	81.13
	TRUE	255	D4	20	21.49		0			TRUE	255	D4	20	81.08
	TRUE	255	D5	20	21.55		0			TRUE	255	D5	20	81.07
	TRUE	255	D6	20	21.52		0			TRUE	255	D6	20	81.08
10组
	Include	Color	Pos	Name	Cp	Concentration	Standard	Status		Include	Color	Pos	Name	Tm1	Tm2	Status
	TRUE	255	A1	1	12.6		0			TRUE	255	A1	1	85.49
	TRUE	255	A2	1	12.48		0			TRUE	255	A2	1	85.47
	TRUE	255	A3	1	12.32		0			TRUE	255	A3	1	85.45
	TRUE	255	B1	2	12.33		0			TRUE	255	B1	2	85.46
	TRUE	255	B2	2	12.1		0			TRUE	255	B2	2	85.44
	TRUE	255	B3	2	12.28		0			TRUE	255	B3	2	85.43
	TRUE	255	E4	21	19.93		0			TRUE	255	E4	21	87.5
	TRUE	255	E5	21	20.01		0			TRUE	255	E5	21	87.51
	TRUE	255	E6	21	20.16		0			TRUE	255	E6	21	87.51
	TRUE	255	F4	22	20.61		0			TRUE	255	F4	22	87.52
	TRUE	255	F5	22	20.62		0			TRUE	255	F5	22	87.5
	TRUE	255	F6	22	20.6		0			TRUE	255	F6	22	87.51
三、数据分析（2-∆∆Ct法）
1组
	样品NO.	分组标记	数据分析							复孔差异
			GAPDH	EPHA2	∆Ct	-∆∆Ct	2-∆∆Ct	表达丰度	敲减效率	内参基因	目的基因
	4892	NC	12.6	19.89	7.29	0.07	1.04972	1.00078		0.28	0.14
			12.48	19.84	7.36	0	1
			12.32	19.75	7.43	-0.07	0.952638
	4893	KD	12.33	20.29	7.96	-0.6	0.659754	0.660811	0.339189	0.23	0.15
			12.1	20.16	8.06	-0.7	0.615572
			12.28	20.14	7.86	-0.5	0.707107
2组
	样品NO.	分组标记	数据分析							复孔差异
			GAPDH	NR4A2	∆Ct	-∆∆Ct	2-∆∆Ct	表达丰度	敲减效率	内参基因	目的基因
	4892	NC	12.6	24.63	12.03	0.05	1.03526	1.00276		0.28	0.17
			12.48	24.46	11.98	0.1	1.07177
			12.32	24.55	12.23	-0.15	0.90125
	4893	KD	12.33	25.51	13.18	-1.1	0.466516	0.476927	0.523073	0.23	0.19
			12.1	25.32	13.22	-1.14	0.45376
			12.28	25.33	13.05	-0.97	0.510506
3组
	样品NO.	分组标记	数据分析							复孔差异
			GAPDH	CSF2	∆Ct	-∆∆Ct	2-∆∆Ct	表达丰度	敲减效率	内参基因	目的基因
	4892	NC	12.6	19.7	7.1	0.00333333	1.00231	1.0002		0.28	0.24
			12.48	19.55	7.07	0.0333333	1.02337
			12.32	19.46	7.14	-0.0366667	0.974905
	4893	KD	12.33	20.24	7.91	-0.806667	0.571701	0.558153	0.441847	0.23	0.14
			12.1	20.22	8.12	-1.01667	0.494257
			12.28	20.1	7.82	-0.716667	0.608502
4组
	样品NO.	分组标记	数据分析							复孔差异
			GAPDH	MET	∆Ct	-∆∆Ct	2-∆∆Ct	表达丰度	敲减效率	内参基因	目的基因
	4892	NC	12.6	19.15	6.55	0.00333333	1.00231	1.00292		0.28	0.25
			12.48	18.9	6.42	0.133333	1.09682
			12.32	19.01	6.69	-0.136667	0.909618
	4893	KD	12.33	19.49	7.16	-0.606667	0.656712	0.672849	0.327151	0.23	0.2
			12.1	19.29	7.19	-0.636667	0.643197
			12.28	19.31	7.03	-0.476667	0.718636
5组
	样品NO.	分组标记	数据分析							复孔差异
			GAPDH	FOXM1	∆Ct	-∆∆Ct	2-∆∆Ct	表达丰度	敲减效率	内参基因	目的基因
	4892	NC	12.6	18.92	6.32	0.0966667	1.0693	1.00201		0.28	0.06
			12.48	18.87	6.39	0.0266667	1.01866
			12.32	18.86	6.54	-0.123333	0.918064
	4893	KD	12.33	19.29	6.96	-0.543333	0.686184	0.657283	0.342717	0.23	0.08
			12.1	19.29	7.19	-0.773333	0.585064
			12.28	19.21	6.93	-0.513333	0.700602
6组
	样品NO.	分组标记	数据分析							复孔差异
			GAPDH	EEF1A1	∆Ct	-∆∆Ct	2-∆∆Ct	表达丰度	敲减效率	内参基因	目的基因
	4892	NC	12.6	12.77	0.17	0.00666667	1.00463	1.00194		0.28	0.22
			12.48	12.55	0.07	0.106667	1.07674
			12.32	12.61	0.29	-0.113333	0.92445
	4893	KD	12.33	12.51	0.18	-0.00333333	0.997692	0.978084	0.0219161	0.23	0.19
			12.1	12.52	0.42	-0.243333	0.844791
			12.28	12.33	0.05	0.126667	1.09177
7组
	样品NO.	分组标记	数据分析							复孔差异
			GAPDH	FOXO3	∆Ct	-∆∆Ct	2-∆∆Ct	表达丰度	敲减效率	内参基因	目的基因
	4892	NC	12.6	20.3	7.7	0.0166667	1.01162	1.00179		0.28	0.2
			12.48	20.1	7.62	0.0966667	1.0693
			12.32	20.15	7.83	-0.113333	0.92445
	4893	KD	12.33	20.79	8.46	-0.743333	0.597358	0.580037	0.419963	0.23	0.11
			12.1	20.76	8.66	-0.943333	0.52003
			12.28	20.68	8.4	-0.683333	0.622725
8组
	样品NO.	分组标记	数据分析							复孔差异
			GAPDH	YWHAZ	∆Ct	-∆∆Ct	2-∆∆Ct	表达丰度	敲减效率	内参基因	目的基因
	4892	NC	12.6	15.94	3.34	0.293333	1.22547	1.01142		0.28	0.25
			12.48	16.19	3.71	-0.0766667	0.948246
			12.32	16.17	3.85	-0.216667	0.860551
	4893	KD	12.33	16.62	4.29	-0.656667	0.634342	0.58609	0.41391	0.23	0.13
			12.1	16.59	4.49	-0.856667	0.552227
			12.28	16.72	4.44	-0.806667	0.571701
9组
	样品NO.	分组标记	数据分析							复孔差异
			GAPDH	VEGFC	∆Ct	-∆∆Ct	2-∆∆Ct	表达丰度	敲减效率	内参基因	目的基因
	4892	NC	12.6	20.89	8.29	0.16	1.11729	1.0057		0.28	0.1
			12.48	20.88	8.4	0.05	1.03526
			12.32	20.98	8.66	-0.21	0.864537
	4893	KD	12.33	21.49	9.16	-0.71	0.61132	0.563221	0.436779	0.23	0.06
			12.1	21.55	9.45	-1	0.5
			12.28	21.52	9.24	-0.79	0.578344
10组
	样品NO.	分组标记	数据分析							复孔差异
			GAPDH	RPS6KA1	∆Ct	-∆∆Ct	2-∆∆Ct	表达丰度	敲减效率	内参基因	目的基因
	4892	NC	12.6	19.93	7.33	0.236667	1.17827	1.01047		0.28	0.23
			12.48	20.01	7.53	0.0366667	1.02574
			12.32	20.16	7.84	-0.273333	0.827406
	4893	KD	12.33	20.61	8.28	-0.713333	0.609909	0.573193	0.426807	0.23	0.02
			12.1	20.62	8.52	-0.953333	0.516438
			12.28	20.6	8.32	-0.753333	0.593231
四、熔解曲线
										RT763	GAPDH
GAPDH溶解曲线图
										RT3389	EPHA2
GENE溶解曲线图
										RT3224	NR4A2
										RT2947	CSF2
										RT1362	MET
										RT6062	FOXM1
										RT1600	EEF1A1
										RT680	FOXO3
										RT12371	YWHAZ
										RT687	VEGFC
										RT14134	RPS6KA1

## Sheet: 11-20
一、扩增曲线
1组
2组
3组
4组
5组
6组
7组
8组
9组
10组
二、原始数据
1组
	Include	Color	Pos	Name	Cp	Concentration	Standard	Status		Include	Color	Pos	Name	Tm1	Tm2	Status
	TRUE	255	A1	1	12.6		0			TRUE	255	A1	1	85.49
	TRUE	255	A2	1	12.48		0			TRUE	255	A2	1	85.47
	TRUE	255	A3	1	12.32		0			TRUE	255	A3	1	85.45
	TRUE	255	B1	2	12.33		0			TRUE	255	B1	2	85.46
	TRUE	255	B2	2	12.1		0			TRUE	255	B2	2	85.44
	TRUE	255	B3	2	12.28		0			TRUE	255	B3	2	85.43
	TRUE	255	G4	23	17.03		0			TRUE	255	G4	23	85.6
	TRUE	255	G5	23	16.9		0			TRUE	255	G5	23	85.58
	TRUE	255	G6	23	17.09		0			TRUE	255	G6	23	85.59
	TRUE	255	H4	24	17.61		0			TRUE	255	H4	24	85.61
	TRUE	255	H5	24	17.62		0			TRUE	255	H5	24	85.63
	TRUE	255	H6	24	17.62		0			TRUE	255	H6	24	85.59
2组
	Include	Color	Pos	Name	Cp	Concentration	Standard	Status		Include	Color	Pos	Name	Tm1	Tm2	Status
	TRUE	255	A1	1	12.6		0			TRUE	255	A1	1	85.49
	TRUE	255	A2	1	12.48		0			TRUE	255	A2	1	85.47
	TRUE	255	A3	1	12.32		0			TRUE	255	A3	1	85.45
	TRUE	255	B1	2	12.33		0			TRUE	255	B1	2	85.46
	TRUE	255	B2	2	12.1		0			TRUE	255	B2	2	85.44
	TRUE	255	B3	2	12.28		0			TRUE	255	B3	2	85.43
	TRUE	255	I4	25	26.48		0			TRUE	255	I4	25	87.51
	TRUE	255	I5	25	26.5		0			TRUE	255	I5	25	87.51
	TRUE	255	I6	25	26.46		0			TRUE	255	I6	25	87.51
	TRUE	255	J4	26	27.5		0			TRUE	255	J4	26	87.51
	TRUE	255	J5	26	27.45		0			TRUE	255	J5	26	87.51
	TRUE	255	J6	26	27.51		0			TRUE	255	J6	26	87.51
3组
	Include	Color	Pos	Name	Cp	Concentration	Standard	Status		Include	Color	Pos	Name	Tm1	Tm2	Status
	TRUE	255	A1	1	12.6		0			TRUE	255	A1	1	85.49
	TRUE	255	A2	1	12.48		0			TRUE	255	A2	1	85.47
	TRUE	255	A3	1	12.32		0			TRUE	255	A3	1	85.45
	TRUE	255	B1	2	12.33		0			TRUE	255	B1	2	85.46
	TRUE	255	B2	2	12.1		0			TRUE	255	B2	2	85.44
	TRUE	255	B3	2	12.28		0			TRUE	255	B3	2	85.43
	TRUE	255	K4	27	26.26		0			TRUE	255	K4	27	82.82
	TRUE	255	K5	27	26.19		0			TRUE	255	K5	27	82.82
	TRUE	255	K6	27	26.25		0			TRUE	255	K6	27	82.83
	TRUE	255	L4	28	27.11		0			TRUE	255	L4	28	82.81
	TRUE	255	L5	28	26.91		0			TRUE	255	L5	28	82.81
	TRUE	255	L6	28	27.11		0			TRUE	255	L6	28	82.82
4组
	Include	Color	Pos	Name	Cp	Concentration	Standard	Status		Include	Color	Pos	Name	Tm1	Tm2	Status
	TRUE	255	A1	1	12.6		0			TRUE	255	A1	1	85.49
	TRUE	255	A2	1	12.48		0			TRUE	255	A2	1	85.47
	TRUE	255	A3	1	12.32		0			TRUE	255	A3	1	85.45
	TRUE	255	B1	2	12.33		0			TRUE	255	B1	2	85.46
	TRUE	255	B2	2	12.1		0			TRUE	255	B2	2	85.44
	TRUE	255	B3	2	12.28		0			TRUE	255	B3	2	85.43
	TRUE	255	M4	29	16.89		0			TRUE	255	M4	29	83.95
	TRUE	255	M5	29	16.83		0			TRUE	255	M5	29	83.94
	TRUE	255	M6	29	16.86		0			TRUE	255	M6	29	83.94
	TRUE	255	N4	30	16.87		0			TRUE	255	N4	30	83.97
	TRUE	255	N5	30	16.85		0			TRUE	255	N5	30	83.96
	TRUE	255	N6	30	16.85		0			TRUE	255	N6	30	83.96
5组
	Include	Color	Pos	Name	Cp	Concentration	Standard	Status		Include	Color	Pos	Name	Tm1	Tm2	Status
	TRUE	255	A1	1	12.6		0			TRUE	255	A1	1	85.49
	TRUE	255	A2	1	12.48		0			TRUE	255	A2	1	85.47
	TRUE	255	A3	1	12.32		0			TRUE	255	A3	1	85.45
	TRUE	255	B1	2	12.33		0			TRUE	255	B1	2	85.46
	TRUE	255	B2	2	12.1		0			TRUE	255	B2	2	85.44
	TRUE	255	B3	2	12.28		0			TRUE	255	B3	2	85.43
	TRUE	255	O4	31	25.43		0			TRUE	255	O4	31	83.89
	TRUE	255	O5	31	25.56		0			TRUE	255	O5	31	83.89
	TRUE	255	O6	31	25.48		0			TRUE	255	O6	31	83.88
	TRUE	255	P4	32	26.68		0			TRUE	255	P4	32	84.13
	TRUE	255	P5	32	26.62		0			TRUE	255	P5	32	84.04
	TRUE	255	P6	32	26.5		0			TRUE	255	P6	32	83.93
6组
	Include	Color	Pos	Name	Cp	Concentration	Standard	Status		Include	Color	Pos	Name	Tm1	Tm2	Status
	TRUE	255	A1	1	12.6		0			TRUE	255	A1	1	85.49
	TRUE	255	A2	1	12.48		0			TRUE	255	A2	1	85.47
	TRUE	255	A3	1	12.32		0			TRUE	255	A3	1	85.45
	TRUE	255	B1	2	12.33		0			TRUE	255	B1	2	85.46
	TRUE	255	B2	2	12.1		0			TRUE	255	B2	2	85.44
	TRUE	255	B3	2	12.28		0			TRUE	255	B3	2	85.43
	TRUE	255	A7	33	23.46		0			TRUE	255	A7	33	90.09
	TRUE	255	A8	33	23.2		0			TRUE	255	A8	33	90.11
	TRUE	255	A9	33	23.01		0			TRUE	255	A9	33	90.15
	TRUE	255	B7	34	24.29		0			TRUE	255	B7	34	90.02
	TRUE	255	B8	34	24.2		0			TRUE	255	B8	34	90.11
	TRUE	255	B9	34	24.26		0			TRUE	255	B9	34	90.03
7组
	Include	Color	Pos	Name	Cp	Concentration	Standard	Status		Include	Color	Pos	Name	Tm1	Tm2	Status
	TRUE	255	A1	1	12.6		0			TRUE	255	A1	1	85.49
	TRUE	255	A2	1	12.48		0			TRUE	255	A2	1	85.47
	TRUE	255	A3	1	12.32		0			TRUE	255	A3	1	85.45
	TRUE	255	B1	2	12.33		0			TRUE	255	B1	2	85.46
	TRUE	255	B2	2	12.1		0			TRUE	255	B2	2	85.44
	TRUE	255	B3	2	12.28		0			TRUE	255	B3	2	85.43
	TRUE	255	C7	35	24.57		0			TRUE	255	C7	35	89.6
	TRUE	255	C8	35	24.44		0			TRUE	255	C8	35	89.62
	TRUE	255	C9	35	24.48		0			TRUE	255	C9	35	89.62
	TRUE	255	D7	36	25.12		0			TRUE	255	D7	36	89.56
	TRUE	255	D8	36	25.09		0			TRUE	255	D8	36	89.61
	TRUE	255	D9	36	25		0			TRUE	255	D9	36	89.6
8组
	Include	Color	Pos	Name	Cp	Concentration	Standard	Status		Include	Color	Pos	Name	Tm1	Tm2	Status
	TRUE	255	A1	1	12.6		0			TRUE	255	A1	1	85.49
	TRUE	255	A2	1	12.48		0			TRUE	255	A2	1	85.47
	TRUE	255	A3	1	12.32		0			TRUE	255	A3	1	85.45
	TRUE	255	B1	2	12.33		0			TRUE	255	B1	2	85.46
	TRUE	255	B2	2	12.1		0			TRUE	255	B2	2	85.44
	TRUE	255	B3	2	12.28		0			TRUE	255	B3	2	85.43
	TRUE	255	E7	37	20.19		0			TRUE	255	E7	37	86.46
	TRUE	255	E8	37	20.12		0			TRUE	255	E8	37	86.5
	TRUE	255	E9	37	20.01		0			TRUE	255	E9	37	86.5
	TRUE	255	F7	38	20.77		0			TRUE	255	F7	38	86.45
	TRUE	255	F8	38	20.77		0			TRUE	255	F8	38	86.51
	TRUE	255	F9	38	20.6		0			TRUE	255	F9	38	86.48
9组
	Include	Color	Pos	Name	Cp	Concentration	Standard	Status		Include	Color	Pos	Name	Tm1	Tm2	Status
	TRUE	255	A1	1	12.6		0			TRUE	255	A1	1	85.49
	TRUE	255	A2	1	12.48		0			TRUE	255	A2	1	85.47
	TRUE	255	A3	1	12.32		0			TRUE	255	A3	1	85.45
	TRUE	255	B1	2	12.33		0			TRUE	255	B1	2	85.46
	TRUE	255	B2	2	12.1		0			TRUE	255	B2	2	85.44
	TRUE	255	B3	2	12.28		0			TRUE	255	B3	2	85.43
	TRUE	255	G7	39	22.68		0			TRUE	255	G7	39	83.52
	TRUE	255	G8	39	22.71		0			TRUE	255	G8	39	83.54
	TRUE	255	G9	39	22.6		0			TRUE	255	G9	39	83.53
	TRUE	255	H7	40	23.49		0			TRUE	255	H7	40	83.55
	TRUE	255	H8	40	23.27		0			TRUE	255	H8	40	83.55
	TRUE	255	H9	40	23.29		0			TRUE	255	H9	40	83.53
10组
	Include	Color	Pos	Name	Cp	Concentration	Standard	Status		Include	Color	Pos	Name	Tm1	Tm2	Status
	TRUE	255	A1	1	12.6		0			TRUE	255	A1	1	85.49
	TRUE	255	A2	1	12.48		0			TRUE	255	A2	1	85.47
	TRUE	255	A3	1	12.32		0			TRUE	255	A3	1	85.45
	TRUE	255	B1	2	12.33		0			TRUE	255	B1	2	85.46
	TRUE	255	B2	2	12.1		0			TRUE	255	B2	2	85.44
	TRUE	255	B3	2	12.28		0			TRUE	255	B3	2	85.43
	TRUE	255	I7	41	21.57		0			TRUE	255	I7	41	84.41
	TRUE	255	I8	41	21.58		0			TRUE	255	I8	41	84.44
	TRUE	255	I9	41	21.48		0			TRUE	255	I9	41	84.38
	TRUE	255	J7	42	22.64		0			TRUE	255	J7	42	84.38
	TRUE	255	J8	42	22.63		0			TRUE	255	J8	42	84.41
	TRUE	255	J9	42	22.6		0			TRUE	255	J9	42	84.41
三、数据分析（2-∆∆Ct法）
1组
	样品NO.	分组标记	数据分析							复孔差异
			GAPDH	EGFR	∆Ct	-∆∆Ct	2-∆∆Ct	表达丰度	敲减效率	内参基因	目的基因
	4892	NC	12.6	17.03	4.43	0.11	1.07923	1.0062		0.28	0.19
			12.48	16.9	4.42	0.12	1.08673
			12.32	17.09	4.77	-0.23	0.852635
	4893	KD	12.33	17.61	5.28	-0.74	0.598739	0.560023	0.439977	0.23	0.01
			12.1	17.62	5.52	-0.98	0.50698
			12.28	17.62	5.34	-0.8	0.574349
2组
	样品NO.	分组标记	数据分析							复孔差异
			GAPDH	WNT5A	∆Ct	-∆∆Ct	2-∆∆Ct	表达丰度	敲减效率	内参基因	目的基因
	4892	NC	12.6	26.48	13.88	0.133333	1.09682	1.00272		0.28	0.04
			12.48	26.5	14.02	-0.00666667	0.99539
			12.32	26.46	14.14	-0.126667	0.915945
	4893	KD	12.33	27.5	15.17	-1.15667	0.448548	0.424919	0.575081	0.23	0.06
			12.1	27.45	15.35	-1.33667	0.395934
			12.28	27.51	15.23	-1.21667	0.430276
3组
	样品NO.	分组标记	数据分析							复孔差异
			GAPDH	RUNX2	∆Ct	-∆∆Ct	2-∆∆Ct	表达丰度	敲减效率	内参基因	目的基因
	4892	NC	12.6	26.26	13.66	0.106667	1.07674	1.00325		0.28	0.07
			12.48	26.19	13.71	0.0566667	1.04006
			12.32	26.25	13.93	-0.163333	0.89296
	4893	KD	12.33	27.11	14.78	-1.01333	0.4954	0.486377	0.513623	0.23	0.2
			12.1	26.91	14.81	-1.04333	0.485205
			12.28	27.11	14.83	-1.06333	0.478525
4组
	样品NO.	分组标记	数据分析							复孔差异
			GAPDH	HMGB1	∆Ct	-∆∆Ct	2-∆∆Ct	表达丰度	敲减效率	内参基因	目的基因
	4892	NC	12.6	16.89	4.29	0.103333	1.07425	1.00269		0.28	0.06
			12.48	16.83	4.35	0.0433333	1.03049
			12.32	16.86	4.54	-0.146667	0.903335
	4893	KD	12.33	16.87	4.54	-0.146667	0.903335	0.856349	0.143651	0.23	0.02
			12.1	16.85	4.75	-0.356667	0.780967
			12.28	16.85	4.57	-0.176667	0.884745
5组
	样品NO.	分组标记	数据分析							复孔差异
			GAPDH	PTGS2	∆Ct	-∆∆Ct	2-∆∆Ct	表达丰度	敲减效率	内参基因	目的基因
	4892	NC	12.6	25.43	12.83	0.193333	1.1434	1.00483		0.28	0.13
			12.48	25.56	13.08	-0.0566667	0.961483
			12.32	25.48	13.16	-0.136667	0.909618
	4893	KD	12.33	26.68	14.35	-1.32667	0.398688	0.396447	0.603553	0.23	0.18
			12.1	26.62	14.52	-1.49667	0.354371
			12.28	26.5	14.22	-1.19667	0.436282
6组
	样品NO.	分组标记	数据分析							复孔差异
			GAPDH	BTG2	∆Ct	-∆∆Ct	2-∆∆Ct	表达丰度	敲减效率	内参基因	目的基因
	4892	NC	12.6	23.46	10.86	-0.103333	0.93088	1.0013		0.28	0.45
			12.48	23.2	10.72	0.0366667	1.02574
			12.32	23.01	10.69	0.0666667	1.04729
	4893	KD	12.33	24.29	11.96	-1.20333	0.434271	0.418891	0.581109	0.23	0.09
			12.1	24.2	12.1	-1.34333	0.394109
			12.28	24.26	11.98	-1.22333	0.428292
7组
	样品NO.	分组标记	数据分析							复孔差异
			GAPDH	JAG1	∆Ct	-∆∆Ct	2-∆∆Ct	表达丰度	敲减效率	内参基因	目的基因
	4892	NC	12.6	24.57	11.97	0.06	1.04247	1.002		0.28	0.13
			12.48	24.44	11.96	0.07	1.04972
			12.32	24.48	12.16	-0.13	0.913831
	4893	KD	12.33	25.12	12.79	-0.76	0.590496	0.574802	0.425198	0.23	0.12
			12.1	25.09	12.99	-0.96	0.514057
			12.28	25	12.72	-0.69	0.619854
8组
	样品NO.	分组标记	数据分析							复孔差异
			GAPDH	SKP2	∆Ct	-∆∆Ct	2-∆∆Ct	表达丰度	敲减效率	内参基因	目的基因
	4892	NC	12.6	20.19	7.59	0.05	1.03526	1.0004		0.28	0.18
			12.48	20.12	7.64	0	1
			12.32	20.01	7.69	-0.05	0.965936
	4893	KD	12.33	20.77	8.44	-0.8	0.574349	0.562742	0.437258	0.23	0.17
			12.1	20.77	8.67	-1.03	0.48971
			12.28	20.6	8.32	-0.68	0.624165
9组
	样品NO.	分组标记	数据分析							复孔差异
			GAPDH	TLR2	∆Ct	-∆∆Ct	2-∆∆Ct	表达丰度	敲减效率	内参基因	目的基因
	4892	NC	12.6	22.68	10.08	0.116667	1.08423	1.00175		0.28	0.11
			12.48	22.71	10.23	-0.0333333	0.97716
			12.32	22.6	10.28	-0.0833333	0.943874
	4893	KD	12.33	23.49	11.16	-0.963333	0.512871	0.530421	0.469579	0.23	0.22
			12.1	23.27	11.17	-0.973333	0.509328
			12.28	23.29	11.01	-0.813333	0.569066
10组
	样品NO.	分组标记	数据分析							复孔差异
			GAPDH	CDK6	∆Ct	-∆∆Ct	2-∆∆Ct	表达丰度	敲减效率	内参基因	目的基因
	4892	NC	12.6	21.57	8.97	0.106667	1.07674	1.00152		0.28	0.1
			12.48	21.58	9.1	-0.0233333	0.983957
			12.32	21.48	9.16	-0.0833333	0.943874
	4893	KD	12.33	22.64	10.31	-1.23333	0.425334	0.404302	0.595698	0.23	0.04
			12.1	22.63	10.53	-1.45333	0.365177
			12.28	22.6	10.32	-1.24333	0.422396
四、熔解曲线
										RT763	GAPDH
GAPDH溶解曲线图
										RT1931	EGFR
GENE溶解曲线图
										RT5415	WNT5A
										RT1152	RUNX2
										RT3141	HMGB1
										RT1308	PTGS2
										RT6058	BTG2
										RT8756	JAG1
										RT16591	SKP2
										RT434	TLR2
										RT1809	CDK6

## Sheet: 21-30
一、扩增曲线
1组
2组
3组
4组
5组
6组
7组
8组
9组
10组
二、原始数据
1组
	Include	Color	Pos	Name	Cp	Concentration	Standard	Status		Include	Color	Pos	Name	Tm1	Tm2	Status
	TRUE	255	A1	1	12.6		0			TRUE	255	A1	1	85.49
	TRUE	255	A2	1	12.48		0			TRUE	255	A2	1	85.47
	TRUE	255	A3	1	12.32		0			TRUE	255	A3	1	85.45
	TRUE	255	B1	2	12.33		0			TRUE	255	B1	2	85.46
	TRUE	255	B2	2	12.1		0			TRUE	255	B2	2	85.44
	TRUE	255	B3	2	12.28		0			TRUE	255	B3	2	85.43
	TRUE	255	K7	43	20.44		0			TRUE	255	K7	43	85.65
	TRUE	255	K8	43	20.13		0			TRUE	255	K8	43	85.68
	TRUE	255	K9	43	20.13		0			TRUE	255	K9	43	85.69
	TRUE	255	L7	44	20.67		0			TRUE	255	L7	44	85.66
	TRUE	255	L8	44	20.55		0			TRUE	255	L8	44	85.68
	TRUE	255	L9	44	20.53		0			TRUE	255	L9	44	85.68
2组
	Include	Color	Pos	Name	Cp	Concentration	Standard	Status		Include	Color	Pos	Name	Tm1	Tm2	Status
	TRUE	255	A1	1	12.6		0			TRUE	255	A1	1	85.49
	TRUE	255	A2	1	12.48		0			TRUE	255	A2	1	85.47
	TRUE	255	A3	1	12.32		0			TRUE	255	A3	1	85.45
	TRUE	255	B1	2	12.33		0			TRUE	255	B1	2	85.46
	TRUE	255	B2	2	12.1		0			TRUE	255	B2	2	85.44
	TRUE	255	B3	2	12.28		0			TRUE	255	B3	2	85.43
	TRUE	255	M7	45	22.09		0			TRUE	255	M7	45	84.97
	TRUE	255	M8	45	21.87		0			TRUE	255	M8	45	84.96
	TRUE	255	M9	45	21.87		0			TRUE	255	M9	45	84.99
	TRUE	255	N7	46	22.21		0			TRUE	255	N7	46	84.95
	TRUE	255	N8	46	22.2		0			TRUE	255	N8	46	84.98
	TRUE	255	N9	46	22.05		0			TRUE	255	N9	46	84.98
3组
	Include	Color	Pos	Name	Cp	Concentration	Standard	Status		Include	Color	Pos	Name	Tm1	Tm2	Status
	TRUE	255	A1	1	12.6		0			TRUE	255	A1	1	85.49
	TRUE	255	A2	1	12.48		0			TRUE	255	A2	1	85.47
	TRUE	255	A3	1	12.32		0			TRUE	255	A3	1	85.45
	TRUE	255	B1	2	12.33		0			TRUE	255	B1	2	85.46
	TRUE	255	B2	2	12.1		0			TRUE	255	B2	2	85.44
	TRUE	255	B3	2	12.28		0			TRUE	255	B3	2	85.43
	TRUE	255	O7	47	22.15		0			TRUE	255	O7	47	85.67
	TRUE	255	O8	47	21.89		0			TRUE	255	O8	47	85.71
	TRUE	255	O9	47	21.89		0			TRUE	255	O9	47	85.72
	TRUE	255	P7	48	23.49		0			TRUE	255	P7	48	85.61
	TRUE	255	P8	48	23.26		0			TRUE	255	P8	48	85.65
	TRUE	255	P9	48	23.2		0			TRUE	255	P9	48	85.71
4组
	Include	Color	Pos	Name	Cp	Concentration	Standard	Status		Include	Color	Pos	Name	Tm1	Tm2	Status
	TRUE	255	A1	1	12.6		0			TRUE	255	A1	1	85.49
	TRUE	255	A2	1	12.48		0			TRUE	255	A2	1	85.47
	TRUE	255	A3	1	12.32		0			TRUE	255	A3	1	85.45
	TRUE	255	B1	2	12.33		0			TRUE	255	B1	2	85.46
	TRUE	255	B2	2	12.1		0			TRUE	255	B2	2	85.44
	TRUE	255	B3	2	12.28		0			TRUE	255	B3	2	85.43
	TRUE	255	A10	49	22.09		0			TRUE	255	A10	49	86.82
	TRUE	255	A11	49	22.31		0			TRUE	255	A11	49	86.78
	TRUE	255	A12	49	22.19		0			TRUE	255	A12	49	86.84
	TRUE	255	B10	50	23.18		0			TRUE	255	B10	50	86.72
	TRUE	255	B11	50	23.3		0			TRUE	255	B11	50	86.73
	TRUE	255	B12	50	23.2		0			TRUE	255	B12	50	86.74
5组
	Include	Color	Pos	Name	Cp	Concentration	Standard	Status		Include	Color	Pos	Name	Tm1	Tm2	Status
	TRUE	255	A1	1	12.6		0			TRUE	255	A1	1	85.49
	TRUE	255	A2	1	12.48		0			TRUE	255	A2	1	85.47
	TRUE	255	A3	1	12.32		0			TRUE	255	A3	1	85.45
	TRUE	255	B1	2	12.33		0			TRUE	255	B1	2	85.46
	TRUE	255	B2	2	12.1		0			TRUE	255	B2	2	85.44
	TRUE	255	B3	2	12.28		0			TRUE	255	B3	2	85.43
	TRUE	255	C10	51	20.35		0			TRUE	255	C10	51	84.92
	TRUE	255	C11	51	20.34		0			TRUE	255	C11	51	84.89
	TRUE	255	C12	51	20.45		0			TRUE	255	C12	51	84.96
	TRUE	255	D10	52	21.46		0			TRUE	255	D10	52	84.87
	TRUE	255	D11	52	21.49		0			TRUE	255	D11	52	84.89
	TRUE	255	D12	52	21.52		0			TRUE	255	D12	52	84.9
6组
	Include	Color	Pos	Name	Cp	Concentration	Standard	Status		Include	Color	Pos	Name	Tm1	Tm2	Status
	TRUE	255	A1	1	12.6		0			TRUE	255	A1	1	85.49
	TRUE	255	A2	1	12.48		0			TRUE	255	A2	1	85.47
	TRUE	255	A3	1	12.32		0			TRUE	255	A3	1	85.45
	TRUE	255	B1	2	12.33		0			TRUE	255	B1	2	85.46
	TRUE	255	B2	2	12.1		0			TRUE	255	B2	2	85.44
	TRUE	255	B3	2	12.28		0			TRUE	255	B3	2	85.43
	TRUE	255	E10	53	17.31		0			TRUE	255	E10	53	89.39
	TRUE	255	E11	53	17.1		0			TRUE	255	E11	53	89.36
	TRUE	255	E12	53	17.19		0			TRUE	255	E12	53	89.37
	TRUE	255	F10	54	18.33		0			TRUE	255	F10	54	89.37
	TRUE	255	F11	54	18.5		0			TRUE	255	F11	54	89.36
	TRUE	255	F12	54	18.48		0			TRUE	255	F12	54	89.37
7组
	Include	Color	Pos	Name	Cp	Concentration	Standard	Status		Include	Color	Pos	Name	Tm1	Tm2	Status
	TRUE	255	A1	1	12.6		0			TRUE	255	A1	1	85.49
	TRUE	255	A2	1	12.48		0			TRUE	255	A2	1	85.47
	TRUE	255	A3	1	12.32		0			TRUE	255	A3	1	85.45
	TRUE	255	B1	2	12.33		0			TRUE	255	B1	2	85.46
	TRUE	255	B2	2	12.1		0			TRUE	255	B2	2	85.44
	TRUE	255	B3	2	12.28		0			TRUE	255	B3	2	85.43
	TRUE	255	G10	55	22.03		0			TRUE	255	G10	55	84.62
	TRUE	255	G11	55	22.07		0			TRUE	255	G11	55	84.61
	TRUE	255	G12	55	22.08		0			TRUE	255	G12	55	84.65
	TRUE	255	H10	56	23.5		0			TRUE	255	H10	56	84.65
	TRUE	255	H11	56	23.5		0			TRUE	255	H11	56	84.62
	TRUE	255	H12	56	23.59		0			TRUE	255	H12	56	84.68
8组
	Include	Color	Pos	Name	Cp	Concentration	Standard	Status		Include	Color	Pos	Name	Tm1	Tm2	Status
	TRUE	255	A1	1	12.6		0			TRUE	255	A1	1	85.49
	TRUE	255	A2	1	12.48		0			TRUE	255	A2	1	85.47
	TRUE	255	A3	1	12.32		0			TRUE	255	A3	1	85.45
	TRUE	255	B1	2	12.33		0			TRUE	255	B1	2	85.46
	TRUE	255	B2	2	12.1		0			TRUE	255	B2	2	85.44
	TRUE	255	B3	2	12.28		0			TRUE	255	B3	2	85.43
	TRUE	255	I10	57	20.97		0			TRUE	255	I10	57	84.42
	TRUE	255	I11	57	21.01		0			TRUE	255	I11	57	84.42
	TRUE	255	I12	57	20.95		0			TRUE	255	I12	57	84.4
	TRUE	255	J10	58	22.19		0			TRUE	255	J10	58	84.4
	TRUE	255	J11	58	22.19		0			TRUE	255	J11	58	84.39
	TRUE	255	J12	58	22.16		0			TRUE	255	J12	58	84.42
9组
	Include	Color	Pos	Name	Cp	Concentration	Standard	Status		Include	Color	Pos	Name	Tm1	Tm2	Status
	TRUE	255	A1	1	12.6		0			TRUE	255	A1	1	85.49
	TRUE	255	A2	1	12.48		0			TRUE	255	A2	1	85.47
	TRUE	255	A3	1	12.32		0			TRUE	255	A3	1	85.45
	TRUE	255	B1	2	12.33		0			TRUE	255	B1	2	85.46
	TRUE	255	B2	2	12.1		0			TRUE	255	B2	2	85.44
	TRUE	255	B3	2	12.28		0			TRUE	255	B3	2	85.43
	TRUE	255	K10	59	19.06		0			TRUE	255	K10	59	80.84
	TRUE	255	K11	59	19.05		0			TRUE	255	K11	59	80.79
	TRUE	255	K12	59	19.02		0			TRUE	255	K12	59	80.81
	TRUE	255	L10	60	20.01		0			TRUE	255	L10	60	80.82
	TRUE	255	L11	60	20.07		0			TRUE	255	L11	60	80.8
	TRUE	255	L12	60	20.05		0			TRUE	255	L12	60	80.81
10组
	Include	Color	Pos	Name	Cp	Concentration	Standard	Status		Include	Color	Pos	Name	Tm1	Tm2	Status
	TRUE	255	A1	1	12.6		0			TRUE	255	A1	1	85.49
	TRUE	255	A2	1	12.48		0			TRUE	255	A2	1	85.47
	TRUE	255	A3	1	12.32		0			TRUE	255	A3	1	85.45
	TRUE	255	B1	2	12.33		0			TRUE	255	B1	2	85.46
	TRUE	255	B2	2	12.1		0			TRUE	255	B2	2	85.44
	TRUE	255	B3	2	12.28		0			TRUE	255	B3	2	85.43
	TRUE	255	M10	61	19.92		0			TRUE	255	M10	61	84.85
	TRUE	255	M11	61	19.88		0			TRUE	255	M11	61	84.82
	TRUE	255	M12	61	19.79		0			TRUE	255	M12	61	84.81
	TRUE	255	N10	62	21.42		0			TRUE	255	N10	62	84.84
	TRUE	255	N11	62	21.43		0			TRUE	255	N11	62	84.88
	TRUE	255	N12	62	21.32		0			TRUE	255	N12	62	84.9
三、数据分析（2-∆∆Ct法）
1组
	样品NO.	分组标记	数据分析							复孔差异
			GAPDH	NRG1	∆Ct	-∆∆Ct	2-∆∆Ct	表达丰度	敲减效率	内参基因	目的基因
	4892	NC	12.6	20.44	7.84	-0.0733333	0.950439	1.00169		0.28	0.31
			12.48	20.13	7.65	0.116667	1.08423
			12.32	20.13	7.81	-0.0433333	0.97041
	4893	KD	12.33	20.67	8.34	-0.573333	0.672062	0.670037	0.329963	0.23	0.14
			12.1	20.55	8.45	-0.683333	0.622725
			12.28	20.53	8.25	-0.483333	0.715323
2组
	样品NO.	分组标记	数据分析							复孔差异
			GAPDH	MKI67	∆Ct	-∆∆Ct	2-∆∆Ct	表达丰度	敲减效率	内参基因	目的基因
	4892	NC	12.6	22.09	9.49	-0.0133333	0.990801	1.00105		0.28	0.22
			12.48	21.87	9.39	0.0866667	1.06191
			12.32	21.87	9.55	-0.0733333	0.950439
	4893	KD	12.33	22.21	9.88	-0.403333	0.756109	0.740431	0.259569	0.23	0.16
			12.1	22.2	10.1	-0.623333	0.649169
			12.28	22.05	9.77	-0.293333	0.816014
3组
	样品NO.	分组标记	数据分析							复孔差异
			GAPDH	PRKCE	∆Ct	-∆∆Ct	2-∆∆Ct	表达丰度	敲减效率	内参基因	目的基因
	4892	NC	12.6	22.15	9.55	-0.04	0.972655	1.00123		0.28	0.26
			12.48	21.89	9.41	0.1	1.07177
			12.32	21.89	9.57	-0.06	0.959264
	4893	KD	12.33	23.49	11.16	-1.65	0.31864	0.337864	0.662136	0.23	0.29
			12.1	23.26	11.16	-1.65	0.31864
			12.28	23.2	10.92	-1.41	0.376312
4组
	样品NO.	分组标记	数据分析							复孔差异
			GAPDH	ATF3	∆Ct	-∆∆Ct	2-∆∆Ct	表达丰度	敲减效率	内参基因	目的基因
	4892	NC	12.6	22.09	9.49	0.24	1.18099	1.00718		0.28	0.22
			12.48	22.31	9.83	-0.1	0.933033
			12.32	22.19	9.87	-0.14	0.907519
	4893	KD	12.33	23.18	10.85	-1.12	0.460094	0.419793	0.580207	0.23	0.12
			12.1	23.3	11.2	-1.47	0.360982
			12.28	23.2	10.92	-1.19	0.438303
5组
	样品NO.	分组标记	数据分析							复孔差异
			GAPDH	NGF	∆Ct	-∆∆Ct	2-∆∆Ct	表达丰度	敲减效率	内参基因	目的基因
	4892	NC	12.6	20.35	7.75	0.163333	1.11987	1.00603		0.28	0.11
			12.48	20.34	7.86	0.0533333	1.03766
			12.32	20.45	8.13	-0.216667	0.860551
	4893	KD	12.33	21.46	9.13	-1.21667	0.430276	0.396094	0.603906	0.23	0.06
			12.1	21.49	9.39	-1.47667	0.359318
			12.28	21.52	9.24	-1.32667	0.398688
6组
	样品NO.	分组标记	数据分析							复孔差异
			GAPDH	CCND1	∆Ct	-∆∆Ct	2-∆∆Ct	表达丰度	敲减效率	内参基因	目的基因
	4892	NC	12.6	17.31	4.71	0.0233333	1.0163	1.00255		0.28	0.21
			12.48	17.1	4.62	0.113333	1.08172
			12.32	17.19	4.87	-0.136667	0.909618
	4893	KD	12.33	18.33	6	-1.26667	0.415619	0.364139	0.635861	0.23	0.17
			12.1	18.5	6.4	-1.66667	0.31498
			12.28	18.48	6.2	-1.46667	0.361817
7组
	样品NO.	分组标记	数据分析							复孔差异
			GAPDH	PIM1	∆Ct	-∆∆Ct	2-∆∆Ct	表达丰度	敲减效率	内参基因	目的基因
	4892	NC	12.6	22.03	9.43	0.163333	1.11987	1.00436		0.28	0.05
			12.48	22.07	9.59	0.00333333	1.00231
			12.32	22.08	9.76	-0.166667	0.890899
	4893	KD	12.33	23.5	11.17	-1.57667	0.335256	0.308452	0.691548	0.23	0.09
			12.1	23.5	11.4	-1.80667	0.285851
			12.28	23.59	11.31	-1.71667	0.304251
8组
	样品NO.	分组标记	数据分析							复孔差异
			GAPDH	SRPK2	∆Ct	-∆∆Ct	2-∆∆Ct	表达丰度	敲减效率	内参基因	目的基因
	4892	NC	12.6	20.97	8.37	0.14	1.10191	1.00278		0.28	0.06
			12.48	21.01	8.53	-0.02	0.986233
			12.32	20.95	8.63	-0.12	0.920188
	4893	KD	12.33	22.19	9.86	-1.35	0.392292	0.371222	0.628778	0.23	0.03
			12.1	22.19	10.09	-1.58	0.334482
			12.28	22.16	9.88	-1.37	0.386891
9组
	样品NO.	分组标记	数据分析							复孔差异
			GAPDH	EIF4E	∆Ct	-∆∆Ct	2-∆∆Ct	表达丰度	敲减效率	内参基因	目的基因
	4892	NC	12.6	19.06	6.46	0.116667	1.08423	1.00231		0.28	0.04
			12.48	19.05	6.57	0.00666667	1.00463
			12.32	19.02	6.7	-0.123333	0.918064
	4893	KD	12.33	20.01	7.68	-1.10333	0.46544	0.427805	0.572195	0.23	0.06
			12.1	20.07	7.97	-1.39333	0.380684
			12.28	20.05	7.77	-1.19333	0.437291
10组
	样品NO.	分组标记	数据分析							复孔差异
			GAPDH	DIDO1	∆Ct	-∆∆Ct	2-∆∆Ct	表达丰度	敲减效率	内参基因	目的基因
	4892	NC	12.6	19.92	7.32	0.0766667	1.05458	1.0009		0.28	0.13
			12.48	19.88	7.4	-0.00333333	0.997692
			12.32	19.79	7.47	-0.0733333	0.950439
	4893	KD	12.33	21.42	9.09	-1.69333	0.309212	0.29705	0.70295	0.23	0.11
			12.1	21.43	9.33	-1.93333	0.261824
			12.28	21.32	9.04	-1.64333	0.320116
四、熔解曲线
										RT763	GAPDH
GAPDH溶解曲线图
										RT3226	NRG1
GENE溶解曲线图
										RT1614	MKI67
										RT16193	PRKCE
										RT3411	ATF3
										RT1304	NGF
										RT220	CCND1
										RT18150	PIM1
										RT20709	SRPK2
										RT1515	EIF4E
										RT1639	DIDO1
